# Supplementary material for: Indoline hemiaminals: a platform for accessing anthranilic acid derivatives through oxidative deformylation
Source: Royal Society of Chemistry journal article supplement (doi:10.1039/d4ob01218f), 2024-01-01

## **Indoline Hemiaminals: A Platform for Accessing Anthranilic Acid Derivatives through Oxidative Deformylation**

Keisuke Tokushige,<sup>a</sup> Yuito Kobori,<sup>a</sup> Shota Asai<sup>b</sup> and Takumi Abe\*<sup>a</sup>

<sup>a</sup>Graduate School of Medicine, Dentistry and Pharmaceutical Sciences,  
Okayama University, 1-1-1, Tsushima-naka, Kita-ku, Okayama 7008530, Japan

E-mail: t-abe@okayama-u.ac.jp

<sup>b</sup>School of Pharmacy,  
Shujitsu University, 1-6-1, Nishigawara, Naka-ku, Okayama 7038516, Japan

### Supporting Information

|                                                                      |          |
|----------------------------------------------------------------------|----------|
| General methods .....                                                | S2       |
| Optimization of reaction conditions (Table S1) .....                 | S3       |
| Experimental procedures and spectra data for obtained products ..... | S4–S36   |
| References .....                                                     | S37      |
| <sup>1</sup> H and <sup>13</sup> C NMR spectra .....                 | S38–S135 |

**General methods.** Column chromatography was carried out using silica gel (WAKO Gel 75–150 mesh, WAKO Co., Ltd.). Preparative thin-layer chromatography was performed with silica gel plates (60F-254). Melting points (mp) were recorded with a Yamato melting point apparatus model MP-21 and are uncorrected. IR spectra were measured with a HORIBA fourier transform infrared spectrometer FT-720, and absorbance frequencies are reported in reciprocal centimeters ( $\text{cm}^{-1}$ ). NMR experiments were performed with JEOL JNM-ECZ600R ( $^1\text{H}$  NMR: 600 MHz,  $^{13}\text{C}$  NMR: 151 MHz) spectrometer. Chemical shifts are expressed in  $\delta$  (parts per million, ppm) values, and coupling constants are expressed in hertz (Hz).  $^1\text{H}$  NMR spectra were referenced to a solvent signal ( $\text{CDCl}_3$ : 7.26 ppm,  $\text{DMSO}-d_6$ : 2.50 ppm).  $^{13}\text{C}$  NMR spectra were referenced to a solvent signal ( $\text{CDCl}_3$ : 77.1 ppm,  $\text{DMSO}-d_6$ : 39.5). Signal multiplicities are abbreviated as follows: singlet (s), doublet (d), triplet (t), quartet (q), multiplet (m), doublet of doublets (dd), doublet of doublet of doublets (ddd) septet (sept), broad (br). High-resolution MS spectra were recorded with a Bruker microTOF mass spectrometers (ESI-TOF-MS). Reactions were monitored by thin layer chromatography (TLC) carried out on a silica gel plates (60F-254) and visualized under UV illumination at 254 or 365 nm depending on the compounds.

**Table S1.** Optimization of reaction conditions<sup>a [1]</sup>

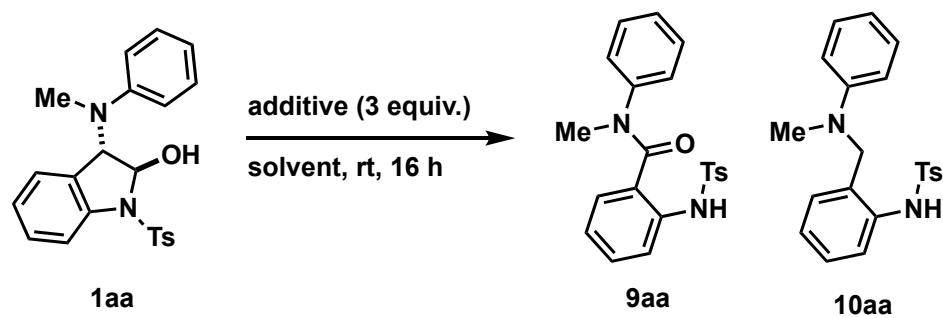

| Entry           | Additive                       | solvent                         | Yield (%) of <b>9aa</b> <sup>b</sup> | Yield (%) of <b>10aa</b> <sup>b</sup> |
|-----------------|--------------------------------|---------------------------------|--------------------------------------|---------------------------------------|
| 1               | <b><i>tert</i>-BuOK</b>        | <b>THF</b>                      | <b>81</b>                            | <b>3</b>                              |
| 2               | <i>tert</i> -BuOK              | toluene                         | 75                                   | 1                                     |
| 3               | <i>tert</i> -BuOK              | MeCN                            | 66                                   | 5                                     |
| 4               | <i>tert</i> -BuOK              | MeOH                            | 65                                   | 0                                     |
| 5               | <i>tert</i> -BuOK              | CH <sub>2</sub> Cl <sub>2</sub> | 71                                   | 0                                     |
| 6               | <i>tert</i> -BuOK              | DMF                             | 76                                   | 4                                     |
| 7               | <b><i>tert</i>-BuOK</b>        | <b>DMSO</b>                     | <b>81</b>                            | <b>3</b>                              |
| 8 <sup>c</sup>  | <i>tert</i> -BuOK              | DMSO                            | 61                                   | 3                                     |
| 9 <sup>d</sup>  | <i>tert</i> -BuOK              | DMSO                            | 72                                   | 2                                     |
| 10 <sup>e</sup> | <i>tert</i> -BuOK              | DMSO                            | 49                                   | 0                                     |
| 11 <sup>f</sup> | <i>tert</i> -BuOK              | DMSO                            | 1                                    | 0                                     |
| 12 <sup>g</sup> | <i>tert</i> -BuOK              | DMSO                            | trace                                | 0                                     |
| 13 <sup>h</sup> | <i>tert</i> -BuOK              | DMSO                            | 80                                   | 0                                     |
| 14              | <i>tert</i> -BuONa             | DMSO                            | 79                                   | 0                                     |
| 15              | <i>tert</i> -BuOLi             | DMSO                            | 60                                   | 0                                     |
| 16              | NaOH                           | DMSO                            | 80                                   | 0                                     |
| 17              | KOH                            | DMSO                            | 77                                   | 0                                     |
| 18              | K <sub>2</sub> CO <sub>3</sub> | DMSO                            | 24                                   | 4                                     |
| 19              | CsCO <sub>3</sub>              | DMSO                            | 74                                   | 0                                     |
| 20              | Et <sub>3</sub> N              | CH <sub>2</sub> Cl <sub>2</sub> | trace                                | -                                     |
| 21              | none                           | DMSO                            | 0                                    | 0                                     |

<sup>a</sup> Reaction condition: 1aa (1.0 mmol) and additive in solvent (5 mL, 0.2 M) under Air. <sup>b</sup> Isolated yield. <sup>c</sup> Using 5 equiv. of *tert*-BuOK. <sup>d</sup> Using 2 equiv. of *tert*-BuOK. <sup>e</sup> Using 1 equiv. of *tert*-BuOK. <sup>f</sup> Under argon. <sup>g</sup> The reaction was performed in DMSO with FTP cycling under argon. <sup>h</sup> Under O<sub>2</sub> (1 atm).

## Synthesis of *N*-protected indoles **S1**

The *N*-protected indoles **S1** as *N*-tosylindoles (**S1a**, **S1e–S1k**), *N*-benzenesulfonylindole (**S1b**), *N*-(4-methoxybenzenesulfonyl)indole (**S1c**), *N*-mesylindole (**S1d**) and *N*-(4-phenylbenzenesulfonyl)indole (**S1l**) were prepared by reported method.<sup>[2]</sup> All substrates were used as received from commercial suppliers (Sigma-Aldrich, Kanto Chemical, TCI, Wako and Nacalai tesque) and all reagents were weighed and handled in air at room temperature. Analytical data are in accordance with the literature values.<sup>[2]</sup>

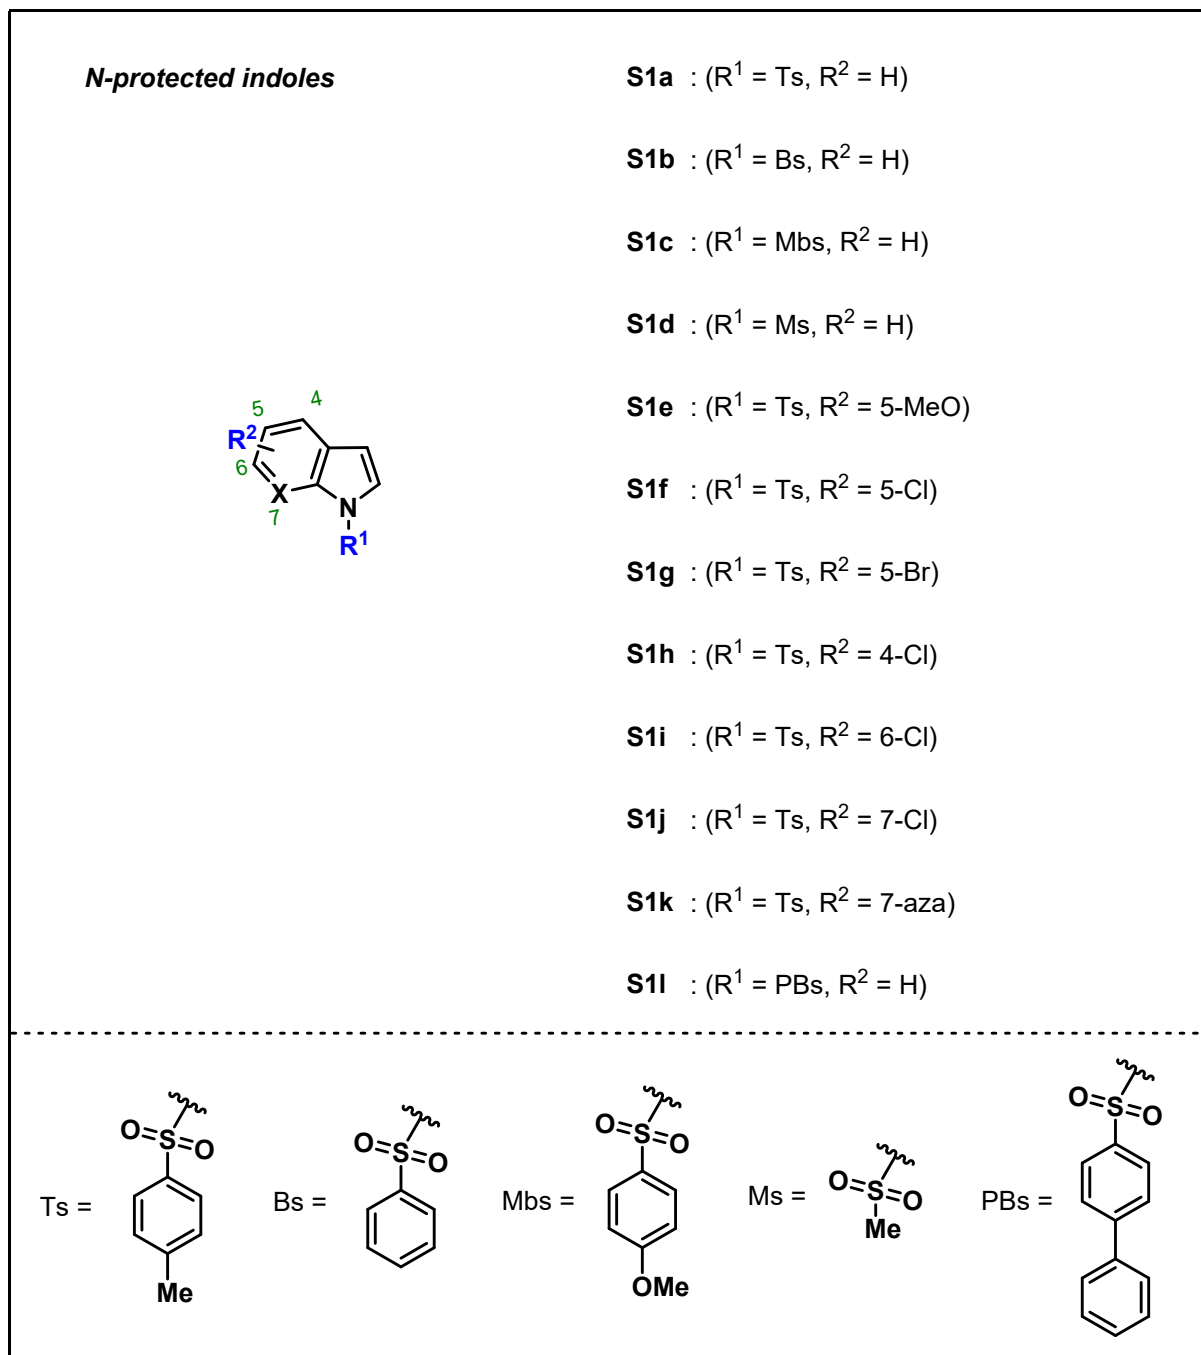

Figure S1.

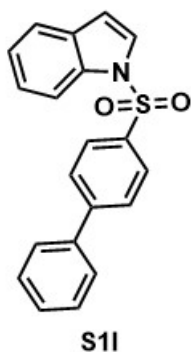

**1-([1,1'-Biphenyl]-4-ylsulfonyl)-1H-indole (S11).**<sup>[2]</sup> To a solution of indole (1.17 g, 10 mmol) and tetrabutylammonium bromide (161 mg, 0.05 equiv., 0.5 mmol) in toluene (10 mL, 0.1 M) were added NaOH (4.00 g, 10equiv., 0.10 mol) and H<sub>2</sub>O (8.0 mL). The solution was stirred at room temperature for 15 minutes, biphenyl sulfonyl chloride (2.78 g, 1.1 equiv., 11 mmol) was added to the solution. After the solution was stirred further 12 h, H<sub>2</sub>O (50 mL) was added to the mixture. The whole was extracted with AcOEt (3 x 50 mL). The combined organic layer was washed with brine (50 mL), dried over Na<sub>2</sub>SO<sub>4</sub>, filtered, and concentrated *in vacuo*. The residue was purified by silica gel column chromatography using hexane/AcOEt (5/1 v/v) to give **S11**.

White solid (2.07 g, 62% yield; mp 105–108 °C). IR (KBr)  $\nu$ : 3392, 3369, 1361, 1166, 761 cm<sup>-1</sup>. <sup>1</sup>H NMR (600 MHz, CDCl<sub>3</sub>)  $\delta$  8.04 (d, *J* = 8.4 Hz, 1H), 7.94 (d, *J* = 8.4 Hz, 2H), 7.62 (d, *J* = 8.4 Hz, 2H), 7.61 (d, *J* = 4.2 Hz, 1H), 7.55 (d, *J* = 7.8 Hz, 1H), 7.50 (d, *J* = 7.2 Hz, 2H), 7.43 (dd, *J* = 7.2, 7.2 Hz, 2H), 7.39 (dd, *J* = 7.8, 7.8 Hz, 1H), 7.34 (ddd, *J* = 7.8, 7.8, 0.6 Hz, 1H), 7.24 (ddd, *J* = 7.8, 7.8, 0.6 Hz, 1H), 6.69 (dd, *J* = 3.6, 0.6 Hz, 1H); <sup>13</sup>C{<sup>1</sup>H} NMR (151 MHz, CDCl<sub>3</sub>)  $\delta$  146.9, 139.0, 136.8, 135.0, 130.9, 129.2, 128.8, 128.0, 127.45, 127.45, 126.5, 124.8, 123.5, 121.6, 113.7, 109.4. HRMS (ESI) *m/z*: [M+Na]<sup>+</sup> Calcd for C<sub>20</sub>H<sub>15</sub>NO<sub>2</sub>SNa 356.0721; Found 356.0720.

## Synthesis of *trans*-2-hydroxyindoline-3-trirethylammonium bromide (HITAB) S2

The *trans*-2-hydroxyindoline-3-triethylammonium bromides (HITAB) S2 were prepared by reported method.<sup>[3]</sup> All reagents were weighed and handled in air at room temperature. Analytical data are in accordance with the literature values (S2a<sup>[3a]</sup>, S2b, S2g, S2i<sup>[3b]</sup>, S2c, S2d<sup>[3c]</sup>, S2e, S2f<sup>[3d]</sup>).

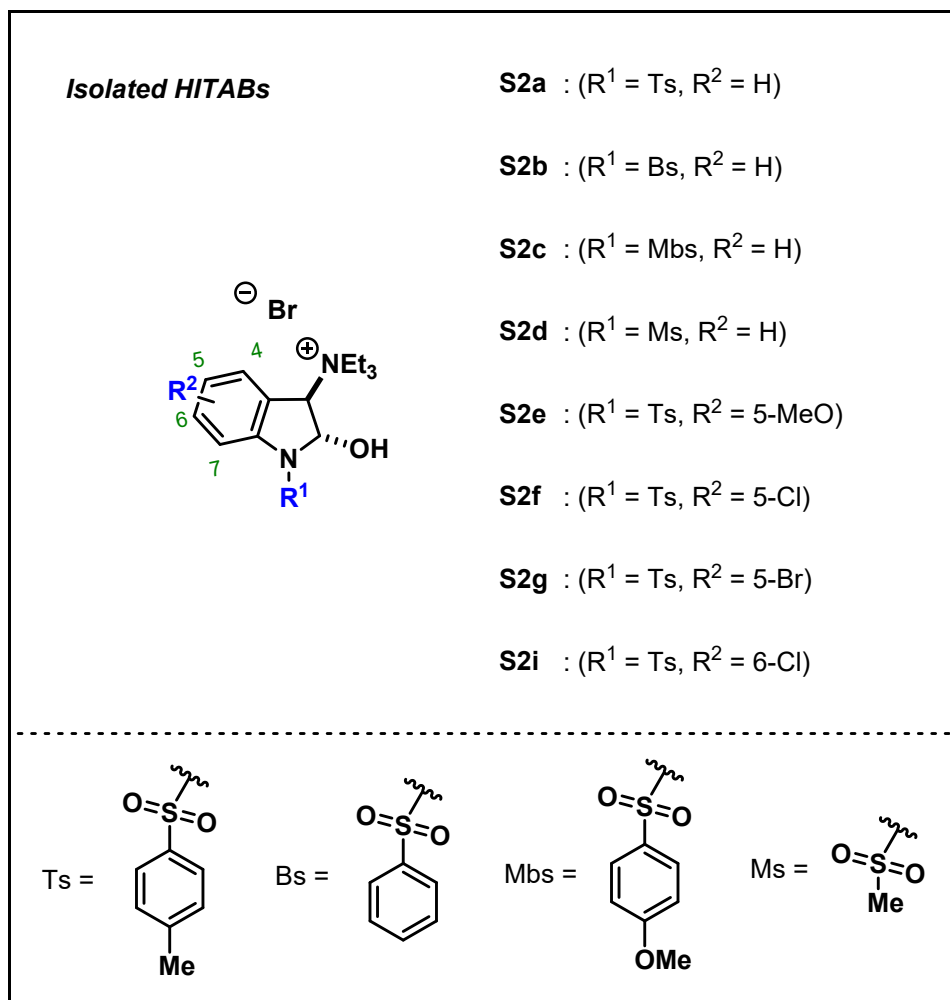

Figure S2.

## Synthesis of indoline hemiaminals **8**

The indoline hemiaminals **8** were prepared by reported method.<sup>[1b, 3, 4]</sup> All reagents were weighed and handled in air at 80 °C. Analytical data are in accordance with the literature values. (8aa<sup>[3a]</sup>, 8ba–8ga, 8ia, 8ka<sup>[3c]</sup>, 8ab, 8ac, 8ae, 8ah–8al, 8ar, 8as<sup>[1b]</sup>, 8ag<sup>[4]</sup>)

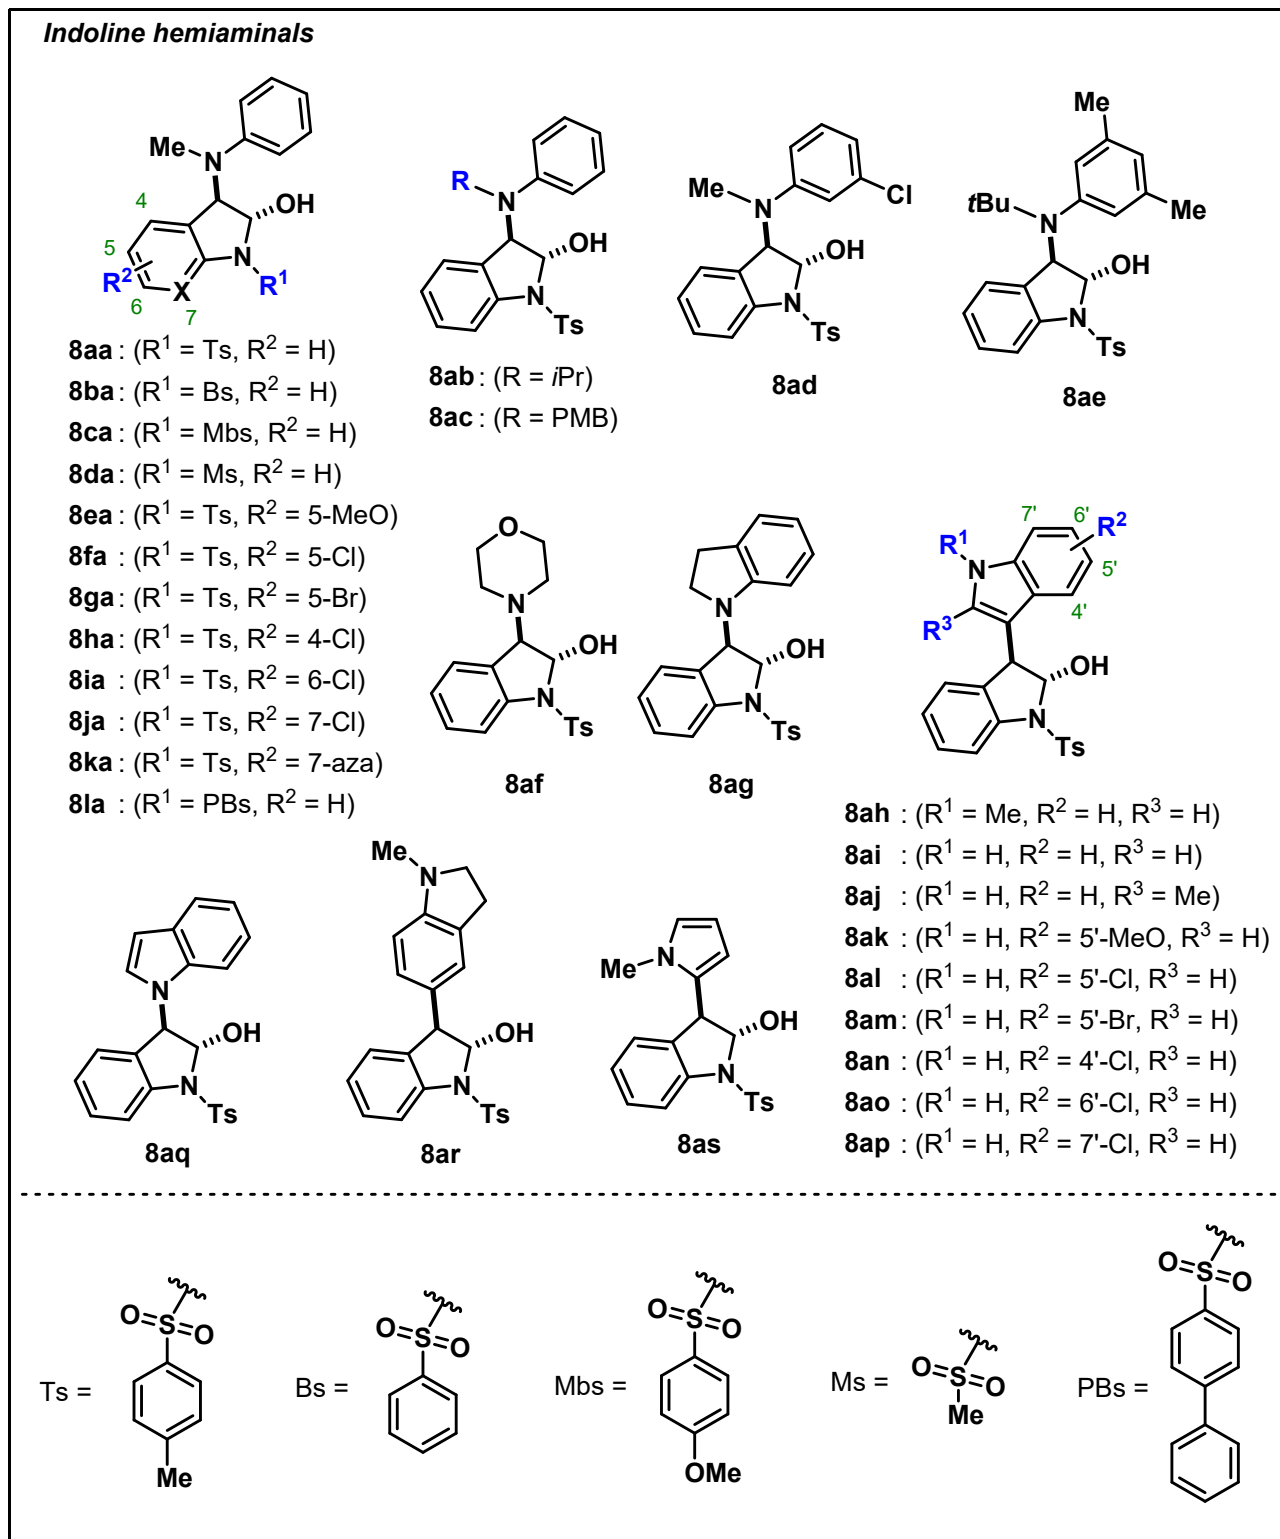

Figure S3.

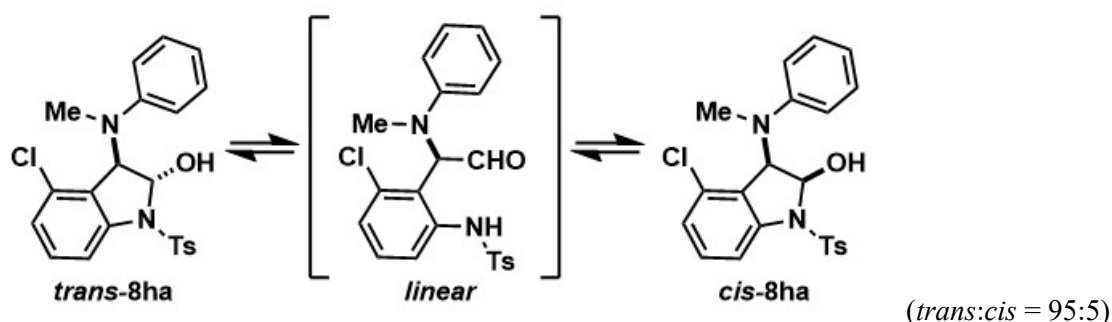

**(rac)-trans-4-Chloro-3-(methyl(phenyl)amino)-1-tosylindolin-2-ol (8ha).**<sup>[4]</sup> To a solution of **S1h** (1.22 mg, 2 equiv., 10 mmol) and H<sub>2</sub>O (1.8 mL, 20 equiv., 0.1 mol) in acetone (50 mL, 0.2 M) was added NBS (1.98 g, 2.2 equiv., 11 mmol). The mixture was stirred at room temperature for 15 h. Then Et<sub>3</sub>N (1.54 mL, 2.2 equiv., 11 mmol) was added to the mixture and stirred further 1 h. The mixture was concentrated *in vacuo*. The residue was dissolved in AcOEt (50 mL, 0.1 M) and added *N*-methylaniline (0.54 mL, 5.0 mmol) and Et<sub>3</sub>N (1.39 mL, 2.0 equiv., 10 mmol). The mixture was stirred at 80 °C in oil bath for 23 hours. After the whole was cooled to room temperature, H<sub>2</sub>O (50 mL) was added to the mixture. The whole was extracted with AcOEt (3 x 50 mL). The combined organic layer was washed with brine (50 mL), dried over Na<sub>2</sub>SO<sub>4</sub>, filtered, and concentrated *in vacuo*. The residue was purified by silica gel column chromatography using hexane/AcOEt (3/1 v/v) to give **8ha**.

Blue solid (2.14 g, quant.; mp 154–156 °C). IR (KBr)  $\nu$ : 3482, 3093, 3058, 3025, 2948, 2827, 1598, 1450, 1342, 1157, 754 cm<sup>-1</sup>. <sup>1</sup>H NMR (600 MHz, CDCl<sub>3</sub>)  $\delta$  7.75 (d, *J* = 8.4 Hz, 2H), 7.57 (d, *J* = 7.8 Hz, 1H), 7.31 (dd, *J* = 8.4, 8.4 Hz, 1H), 7.27–7.24 (m, 4H), 7.05 (d, *J* = 8.4 Hz, 1H), 6.85 (d, *J* = 8.4 Hz, 2H), 6.80 (dd, *J* = 7.2, 7.2 Hz, 1H), 5.59 (d, *J* = 1.2 Hz, 1H), 5.14 (d, *J* = 1.2 Hz, 1H), 3.62 (br s, 1H), 2.39 (s, 3H), 1.94 (s, 3H); <sup>13</sup>C{<sup>1</sup>H} NMR (151 MHz, CDCl<sub>3</sub>)  $\delta$  148.9, 145.1, 142.4, 135.4, 133.0, 131.5, 130.2, 129.3, 127.1, 125.8, 124.8, 118.0, 113.5, 112.8, 91.0, 67.1, 32.1, 21.7. HRMS (ESI) *m/z*: [M+Na]<sup>+</sup> Calcd for C<sub>22</sub>H<sub>21</sub>N<sub>2</sub>O<sub>3</sub>SNa 451.0859, 453.0830; Found 451.0855, 453.0828.

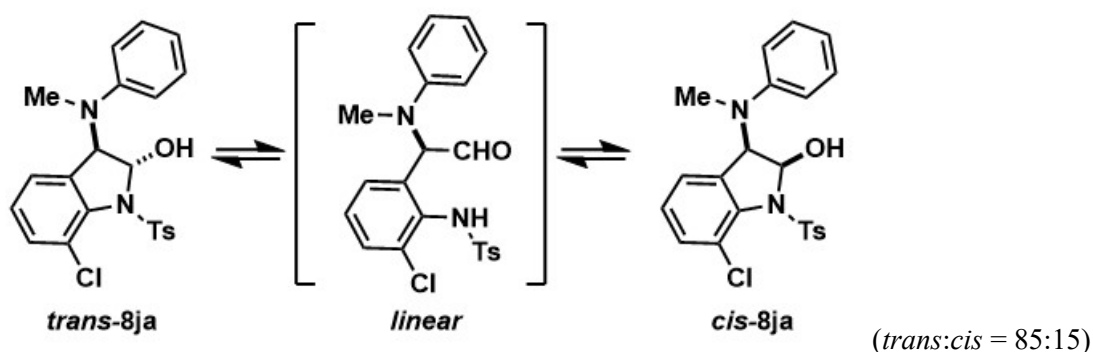

**(rac)-trans-7-Chloro-3-(methyl(phenyl)amino)-1-tosylindolin-2-ol (8ja).**<sup>[4]</sup> To a solution of **S1j** (917 mg, 2 equiv., 3 mmol) and H<sub>2</sub>O (0.54 mL, 20 equiv., 30 mmol) in acetone (15 mL, 0.2 M) was added NBS (587 mg, 2.2 equiv., 3.3 mmol). The mixture was stirred at room temperature for 9 h. Then Et<sub>3</sub>N (0.46 mL, 2.2 equiv., 3.3 mmol) was added to the mixture and stirred further 1 h. The mixture was concentrated *in vacuo*. The residue was dissolved in AcOEt (15 mL, 0.1 M) and added *N*-methylaniline (161 mg, 1.5 mmol) and Et<sub>3</sub>N (0.42 mL,



2.0 equiv., 3 mmol). The mixture was stirred at 80 °C in oil bath for 6 hours. After the whole was cooled to room temperature, H<sub>2</sub>O (20 mL) was added to the mixture. The whole was extracted with AcOEt (3 x 20 mL). The combined organic layer was washed with brine (20 mL), dried over Na<sub>2</sub>SO<sub>4</sub>, filtered, and concentrated *in vacuo*. The residue was purified by silica gel column chromatography using hexane/AcOEt (3/1 v/v) to give **8ja**.

White solid (391 mg, 61% yield; mp 134–136 °C). IR (KBr)  $\nu$ : 3423, 3064, 2979, 2923, 2813, 1600, 1506, 1461, 1328, 1147, 775 cm<sup>-1</sup>. <sup>1</sup>H NMR (600 MHz, CDCl<sub>3</sub>)  $\delta$  7.89 (d, *J* = 8.4 Hz, 1.7H), 7.74 (d, *J* = 7.8 Hz, 0.30H), 7.34–7.25 (m, 5H), 7.19 (d, *J* = 7.2 Hz, 0.85H), 7.14 (dd, *J* = 7.8, 7.8 Hz, 0.15H), 7.08 (dd, *J* = 7.8, 7.8 Hz, 0.85H), 7.01 (d, *J* = 8.4 Hz, 1.85H), 6.87 (dd, *J* = 7.2, 7.2 Hz, 0.85H), 6.81 (dd, *J* = 7.2, 7.2 Hz, 0.15H), 6.64 (d, *J* = 8.4 Hz, 0.30H), 6.21 (s, 0.85H), 6.12 (d, *J* = 5.4 Hz, 0.15H), 5.09 (s, 0.85H), 5.03 (d, *J* = 6.0 Hz, 0.15H), 3.63 (br s, 0.85H), 3.22 (br s, 0.15H), 2.80 (s, 0.45H), 2.61 (s, 2.55H), 2.44 (s, 0.45H), 2.43 (2.55H); <sup>13</sup>C{<sup>1</sup>H} NMR (151 MHz, CDCl<sub>3</sub>)  $\delta$  149.5, 149.4, 144.7, 143.84, 143.84, 139.2, 138.9, 137.9, 136.9, 136.0, 133.0, 132.2, 131.2, 129.9, 129.61, 129.57, 129.50, 127.2, 127.0, 126.1, 126.0, 125.1, 123.9, 122.4, 118.7, 118.0, 114.3, 112.7, 90.6, 88.9, 67.3, 63.6, 36.0, 33.5, 21.8, 21.7. HRMS (ESI) *m/z*: [M+Na]<sup>+</sup> Calcd for C<sub>22</sub>H<sub>21</sub>N<sub>2</sub>O<sub>3</sub>SNa 451.0859, 453.0830; Found 451.0855, 453.0830.

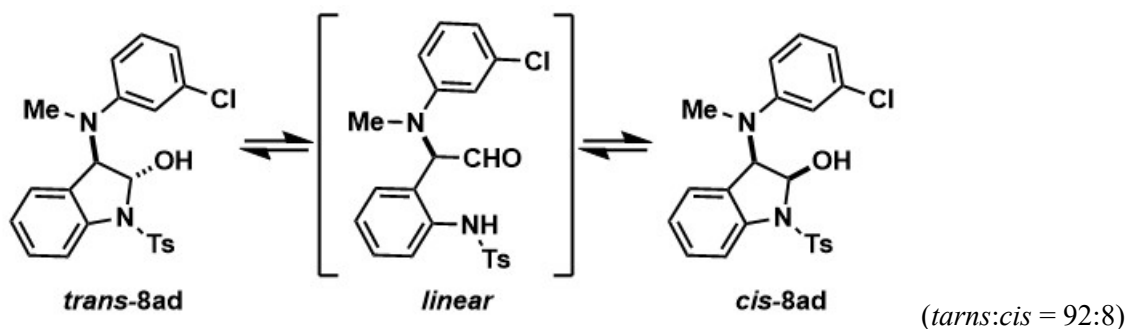

(*rac*)-*trans*-3-((3-Chlorophenyl)(methyl)amino)-1-tosylindolin-2-ol (**8ad**).<sup>[3a]</sup> To a suspension of **S2a** (582 mg, 1.2 equiv., 1.2 mmol) in AcOEt (10 mL, 0.1 M) were added *m*-chloro-*N*-methylaniline (142 mg, 1.0 mmol) and Et<sub>3</sub>N (0.26 mL, 2 equiv., 2.0 mmol). The suspension was stirred at 80 °C in oil bath for 2 h. After the whole was cooled to room temperature, H<sub>2</sub>O (10 mL) was added to the mixture. The whole was extracted with AcOEt (3 x 10 mL). The combined organic layer was washed with brine (10 mL), dried over Na<sub>2</sub>SO<sub>4</sub>, filtered, and concentrated *in vacuo*. The residue was purified by silica gel column chromatography using hexane/AcOEt (2/1 v/v) to give **8ad**.

Purple oil (368 mg, 86% yield; mp 180 °C). IR (KBr)  $\nu$ : 3471, 3064, 2948, 2900, 2817, 1592, 1496, 1346, 1160, 759 cm<sup>-1</sup>. <sup>1</sup>H NMR (600 MHz, CDCl<sub>3</sub>)  $\delta$  7.74 (d, *J* = 8.4 Hz, 2H), 7.65 (d, *J* = 7.2 Hz, 1H), 7.36 (ddd, *J* = 7.8, 7.8, 1.2 Hz, 1H), 7.25 (d, *J* = 8.4 Hz, 2H), 7.14 (dd, *J* = 8.4, 8.4 Hz, 1H), 7.11 (d, *J* = 7.2 Hz, 1H), 7.08 (dd, *J* = 7.8, 7.8 Hz, 1H), 6.84 (dd, *J* = 2.4, 2.4 Hz, 1H), 6.80 (dd, *J* = 8.4, 2.4 Hz, 1H), 6.77 (dd, *J* = 8.4, 1.2 Hz, 1H), 5.54 (d, *J* = 3.0 Hz, 1H), 5.15 (d, *J* = 2.4 Hz, 1H), 3.87 (br s, 1H), 2.38 (s, 3H), 1.91 (s, 3H); <sup>13</sup>C{<sup>1</sup>H} NMR (151 MHz, CDCl<sub>3</sub>)  $\delta$  150.5, 144.9, 140.9, 135.3, 135.2, 130.3, 130.3, 130.1, 127.4, 127.1, 126.3, 124.5, 118.2, 114.5, 113.9, 112.1, 90.2, 67.3, 33.0, 21.7. HRMS (ESI) *m/z*: [M+Na]<sup>+</sup> Calcd for C<sub>22</sub>H<sub>21</sub>ClN<sub>2</sub>O<sub>3</sub>SNa 451.0859, 453.0830; Found 451.0860, 453.0835.

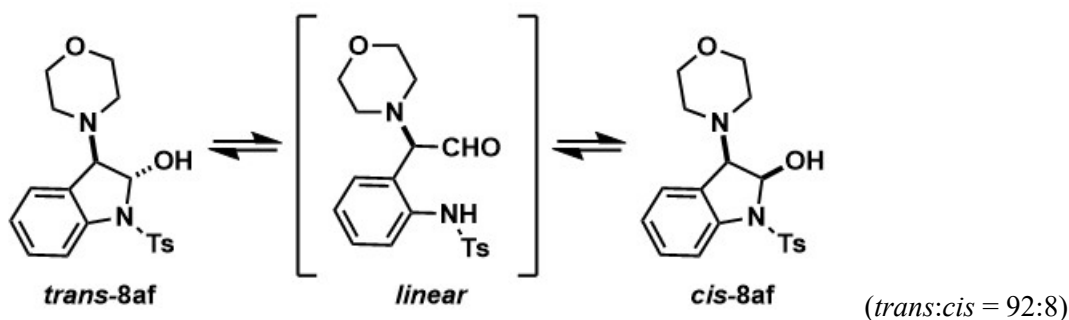

**(rac)-trans-3-Morpholino-1-tosylindolin-2-ol (8af).**<sup>[3a]</sup> To a suspension of **S2a** (582 mg, 1.2 equiv., 1.2 mmol) in AcOEt (10 mL, 0.1 M) were added morpholine (87 mg, 1.0 mmol) and Et<sub>3</sub>N (0.26 mL, 2 equiv., 2.0 mmol). The suspension was stirred at 80 °C in oil bath for 2 h. After the whole was cooled to room temperature, H<sub>2</sub>O (10 mL) was added to the mixture. The whole was extracted with AcOEt (3 x 10 mL). The combined organic layer was washed with brine (10 mL), dried over Na<sub>2</sub>SO<sub>4</sub>, filtered, and concentrated *in vacuo*. The residue was purified by silica gel column chromatography using hexane/AcOEt (2/1 v/v) to give **8af**.

White solid (276 mg, 74% yield; mp 164 °C). IR (KBr)  $\nu$ : 3336, 2969, 2921, 2871, 2819, 1596, 1463, 1353, 1174, 1106, 765 cm<sup>-1</sup>. <sup>1</sup>H NMR (600 MHz, CDCl<sub>3</sub>)  $\delta$  7.75 (d, *J* = 7.8 Hz, 2H), 7.57 (d, *J* = 8.4 Hz, 1H), 7.29 (dd, *J* = 7.8, 7.8 Hz, 1H), 7.26 (d, *J* = 7.8 Hz, 1H), 7.23 (d, *J* = 7.8 Hz, 2H), 7.05 (ddd, *J* = 7.2, 7.2, 0.6 Hz, 1H), 5.68 (d, *J* = 2.4 Hz, 1H), 4.07 (br s, 1H), 4.03 (d, *J* = 1.8 Hz, 1H), 3.49–3.46 (m, 2H), 3.44–3.40 (m, 2H), 2.34 (s, 3H), 2.15 (br s, 2H), 2.01 (br s, 2H); <sup>13</sup>C{<sup>1</sup>H} NMR (151 MHz, CDCl<sub>3</sub>)  $\delta$  1144.7, 140.9, 135.4, 129.95, 129.85, 127.6, 127.1, 126.8, 124.0, 114.1, 85.5, 72.9, 67.0, 48.8, 21.6. HRMS (ESI) *m/z*: [M+Na]<sup>+</sup> Calcd for C<sub>19</sub>H<sub>22</sub>N<sub>2</sub>O<sub>4</sub>SNa 397.1198; Found 397.1197.

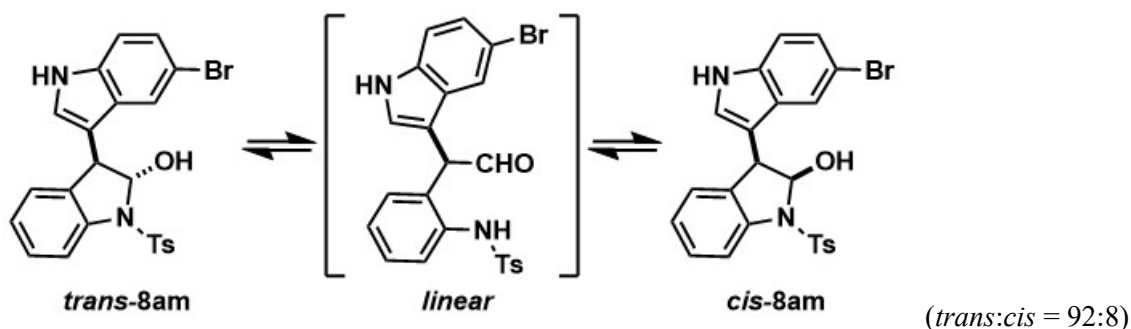

**(rac)-trans-3-(5-Bromo-1H-indol-3-yl)-1-tosylindolin-2-ol (8am).**<sup>[3a]</sup> To a suspension of **S2a** (1.65 g, 1.2 equiv., 3.6 mmol) in AcOEt (30 mL, 0.1 M) were added 5-bromoindole (595 mg, 3.0 mmol) and Et<sub>3</sub>N (0.83 mL, 2 equiv., 6.0 mmol). The suspension was stirred at 80 °C in oil bath for 2 h. After the whole was cooled to room temperature, H<sub>2</sub>O (10 mL) was added to the mixture. The whole was extracted with AcOEt (3 x 10 mL). The combined organic layer was washed with brine (10 mL), dried over Na<sub>2</sub>SO<sub>4</sub>, filtered, and concentrated *in vacuo*. The residue was purified by silica gel column chromatography using hexane/AcOEt (1/1 v/v) to give **8am**.

Brown oil (1.02 g, 70% yield). IR (KBr)  $\nu$ : 3062, 2967, 2923, 1457, 1338, 1164, 750, 576 cm<sup>-1</sup>. <sup>1</sup>H NMR (600 MHz, CDCl<sub>3</sub>)  $\delta$  8.13 (br s, 1H), 7.59 (d, *J* = 7.8 Hz, 1H), 7.56 (d, *J* = 7.8 Hz, 2H), 7.28 (dd, *J* = 7.8, 7.8 Hz,

1H), 7.23 (dd,  $J = 9.0, 1.8$  Hz, 1H), 7.18–7.17 (m, 2H), 7.07 (d,  $J = 8.4$  Hz, 2H), 7.04 (d,  $J = 7.8$  Hz, 1H), 7.01 (dd,  $J = 7.2, 7.2$  Hz, 1H), 6.34 (s, 1H), 5.75 (dd,  $J = 3.0, 3.0$  Hz, 1H), 4.52 (d,  $J = 1.8$  Hz, 1H), 3.94 (d,  $J = 3.0$  Hz, 1H), 2.33 ();  $^{13}\text{C}\{^1\text{H}\}$  NMR (151 MHz,  $\text{CDCl}_3$ )  $\delta$  144.5, 140.0, 135.3, 134.5, 131.0, 129.8, 128.7, 127.6, 127.1, 125.9, 125.s,3H4, 124.3, 124.0, 121.4, 114.6, 114.3, 113.1, 112.9, 93.0, 47.1, 21.8. HRMS (ESI)  $m/z$ :  $[\text{M}+\text{Na}]^+$  Calcd for  $\text{C}_{23}\text{H}_{19}\text{BrN}_2\text{O}_3\text{SNa}$  505.0198, 507.0177; Found 505.0200, 507.0181.

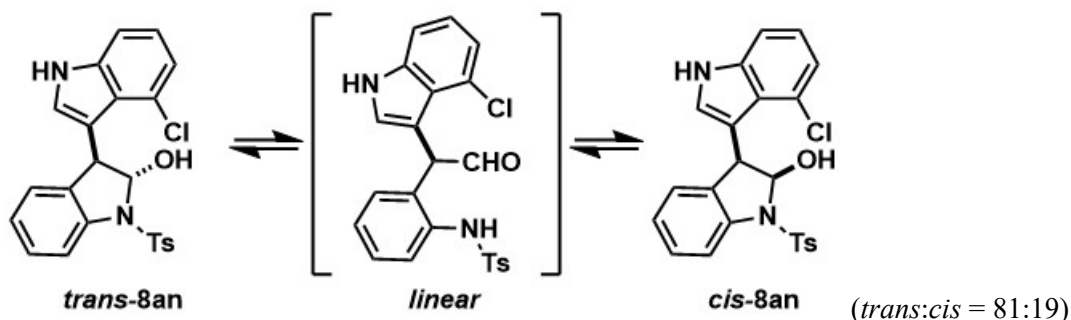

**(rac)-trans-3-(4-Chloro-1H-indol-3-yl)-1-tosylindolin-2-ol (8am)**.<sup>[3a]</sup> To a suspension of **S2a** (1.65 g, 1.2 equiv., 3.6 mmol) in AcOEt (30 mL, 0.1 M) were added 4-chloroindole (455 mg, 3.0 mmol) and  $\text{Et}_3\text{N}$  (0.83 mL, 2 equiv., 6.0 mmol). The suspension was stirred at 80 °C in oil bath for 2 h. After the whole was cooled to room temperature,  $\text{H}_2\text{O}$  (10 mL) was added to the mixture. The whole was extracted with AcOEt (3 x 10 mL). The combined organic layer was washed with brine (10 mL), dried over  $\text{Na}_2\text{SO}_4$ , filtered, and concentrated *in vacuo*. The residue was purified by silica gel column chromatography using hexane/AcOEt (1/1 v/v) to give **8am**.

Yellow oil (1.03 g, 78% yield). IR (KBr)  $\nu$ : 3029, 2967, 2925, 1475, 1340, 1166, 750  $\text{cm}^{-1}$ .  $^1\text{H}$  NMR (600 MHz,  $\text{CDCl}_3$ )  $\delta$  8.46 (br s, 0.2H), 7.86 (br s, 0.8H), 7.82 (d,  $J = 8.4$  Hz, 0.4H), 7.56 (d,  $J = 8.4$  Hz, 1.6H), 7.54–7.53 (m, 1H), 7.28–7.23 (m, 1.6H), 7.18 (d,  $J = 7.8$  Hz, 1.6H), 7.13–7.00 (m, 5H), 6.17 (dd,  $J = 6.6, 4.8$  Hz, 0.2H), 5.91 (s, 0.8H), 5.61 (br s, 0.8H), 5.45 (d,  $J = 6.6$  Hz, 0.2H), 5.05 (s, 0.8H), 3.39 (br s, 0.8H), 2.83 (d,  $J = 4.8$  Hz, 0.2H), 2.38 (s, 0.6H), 2.33 (s, 2.4H);  $^{13}\text{C}\{^1\text{H}\}$  NMR (151 MHz,  $\text{CDCl}_3$ )  $\delta$  144.4, 143.9, 140.4, 140.0, 138.0, 136.2, 135.5, 132.6, 132.2, 129.8, 129.4, 128.6, 128.4, 127.3, 126.8, 126.6, 126.0, 125.8, 125.7, 124.2, 124.1, 123.0, 122.9, 121.0, 120.8, 115.8, 114.8, 114.7, 110.8, 110.2, 108.7, 93.2, 87.7, 47.3, 44.8, 21.63, 21.57. HRMS (ESI)  $m/z$ :  $[\text{M}+\text{Na}]^+$  Calcd for  $\text{C}_{23}\text{H}_{19}\text{N}_2\text{O}_3\text{SNa}$  461.0703, 463.0673; Found 461.0702, 463.0669.

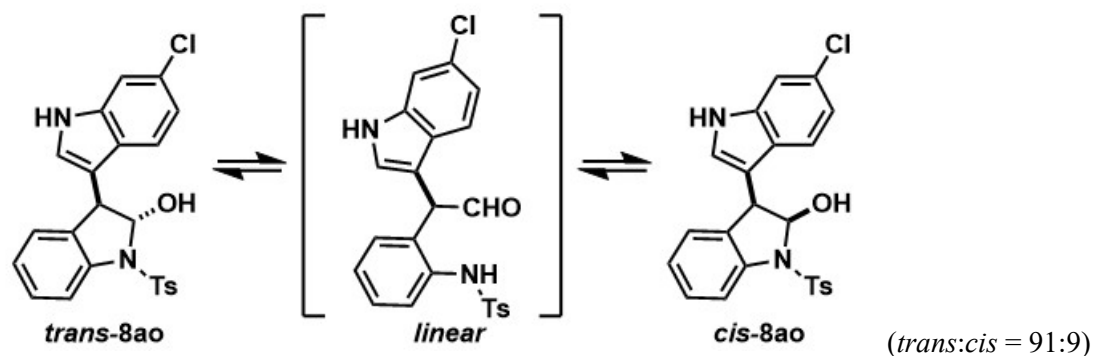

**(rac)-trans-3-(6-Chloro-1H-indol-3-yl)-1-tosylindolin-2-ol (8ao)**.<sup>[3a]</sup> To a suspension of **S2a** (1.65 g, 1.2 equiv., 3.6 mmol) in AcOEt (30 mL, 0.1 M) were added 6-chloroindole (455 mg, 3.0 mmol) and  $\text{Et}_3\text{N}$  (0.83 mL,

2 equiv., 6.0 mmol). The suspension was stirred at 80 °C in oil bath for 2 h. After the whole was cooled to room temperature, H<sub>2</sub>O (10 mL) was added to the mixture. The whole was extracted with AcOEt (3 x 10 mL). The combined organic layer was washed with brine (10 mL), dried over Na<sub>2</sub>SO<sub>4</sub>, filtered, and concentrated *in vacuo*. The residue was purified by silica gel column chromatography using hexane/AcOEt (1/1 v/v) to give **8ao**. Yellow oil (1.14 g, 86% yield). IR (KBr)  $\nu$ : 3384, 3064, 2965, 2877, 1596, 1459, 1340, 1166, 752, 578 cm<sup>-1</sup>. <sup>1</sup>H NMR (600 MHz, CDCl<sub>3</sub>)  $\delta$  8.01 (br s, 1H), 7.63 (d, *J* = 7.8 Hz, 1H), 7.60 (d, *J* = 8.4 Hz, 2H), 7.29–7.27 (m, 2H), 7.09 (d, *J* = 8.4 Hz, 2H), 7.03–6.98 (m, 2H), 6.74 (dd, *J* = 7.8, 1.8 Hz, 1H), 6.64 (d, *J* = 9.0 Hz, 1H), 6.48 (d, *J* = 2.4 Hz, 1H), 5.74 (d, *J* = 3.0 Hz, 1H), 4.53 (d, *J* = 3.0 Hz, 1H), 3.84 (br s, 1H), 2.37 (s, 3H); <sup>13</sup>C{<sup>1</sup>H} NMR (151 MHz, CDCl<sub>3</sub>)  $\delta$  144.6, 139.9, 137.1, 134.4, 131.3, 129.8, 128.7, 128.2, 127.2, 125.9, 124.34, 124.28, 123.6, 120.3, 119.6, 115.0, 114.2, 111.3, 92.9, 47.3, 21.7. HRMS (ESI) *m/z*: [M+Na]<sup>+</sup> Calcd for C<sub>23</sub>H<sub>19</sub>ClN<sub>2</sub>O<sub>3</sub>SNa 461.0703, 463.0673; Found 461.0700, 463.0674.

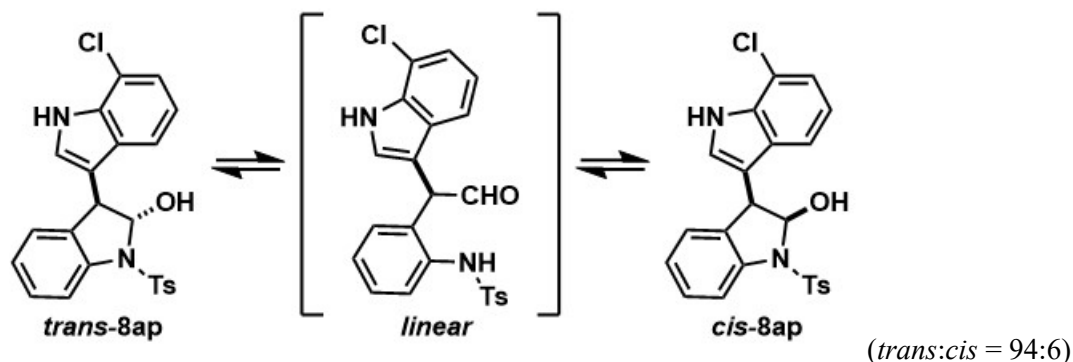

(*rac*)-*trans*-3-(7-Chloro-1*H*-indol-3-yl)-1-tosylindolin-2-ol (**8ap**).<sup>[4]</sup> To a suspension of **S2a** (1.65 g, 1.2 equiv., 3.6 mmol) in AcOEt (30 mL, 0.1 M) were added 7-chloroindole (455 mg, 3.0 mmol) and Et<sub>3</sub>N (0.83 mL, 2 equiv., 6.0 mmol). The suspension was stirred at 80 °C in oil bath for 2 h. After the whole was cooled to room temperature, H<sub>2</sub>O (10 mL) was added to the mixture. The whole was extracted with AcOEt (3 x 10 mL). The combined organic layer was washed with brine (10 mL), dried over Na<sub>2</sub>SO<sub>4</sub>, filtered, and concentrated *in vacuo*. The residue was purified by silica gel column chromatography using hexane/AcOEt (1/1 v/v) to give **8ap**. Pale-yellow oil (529 mg, 40% yield). IR (KBr)  $\nu$ : 3064, 2956, 2923, 1596, 1477, 1346, 1166, 754, 576 cm<sup>-1</sup>. <sup>1</sup>H NMR (600 MHz, CDCl<sub>3</sub>)  $\delta$  8.09 (br s, 1H), 7.66 (d, *J* = 8.4 Hz, 1H), 7.53 (d, *J* = 7.8 Hz, 2H), 7.30 (ddd, *J* = 7.8, 7.8, 0.6 Hz, 1H), 7.15 (dd, *J* = 7.2, 1.8 Hz, 1H), 7.05–7.01 (m, 4H), 6.78–6.76 (m, 2H), 6.43 (d, *J* = 2.4 Hz, 1H), 5.76 (dd, *J* = 3.0, 3.0 Hz, 1H), 4.54 (d, *J* = 3.0 Hz, 1H), 3.87 (d, *J* = 3.0 Hz, 1H), 2.37 (s, 3H); <sup>13</sup>C{<sup>1</sup>H} NMR (151 MHz, CDCl<sub>3</sub>)  $\delta$  144.4, 140.0, 134.6, 134.0, 131.3, 129.7, 128.7, 127.2, 127.1, 125.9, 124.4, 123.4, 121.8, 120.5, 117.6, 116.7, 116.3, 114.6, 92.8, 47.3, 21.7. HRMS (ESI) *m/z*: [M+Na]<sup>+</sup> Calcd for C<sub>23</sub>H<sub>19</sub>ClN<sub>2</sub>O<sub>3</sub>SNa 461.0703, 463.0673; Found 461.0698, 463.0678.

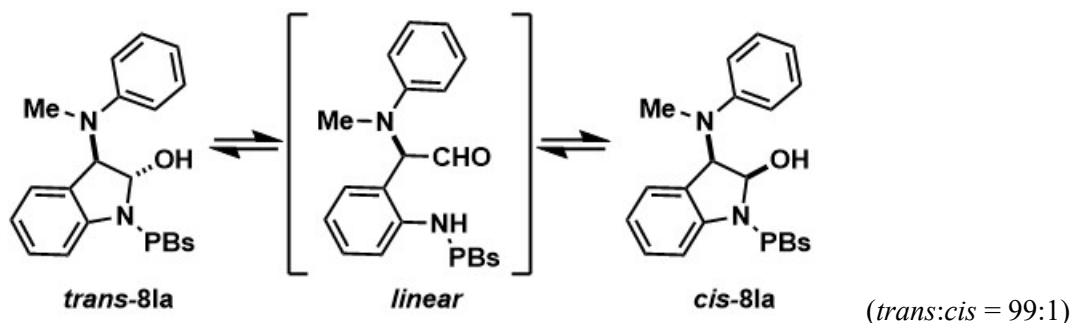

**(rac)-trans-1-([1,1'-Biphenyl]-4-ylsulfonyl)-3-(methyl(phenyl)amino)indolin-2-ol (8la).**<sup>[4]</sup> To a solution of **S11** (1.00 g, 2 equiv., 3 mmol) and H<sub>2</sub>O (0.54 mL, 20 equiv., 30 mmol) in acetone (15 mL, 0.2 M) was added NBS (587 mg, 2.2 equiv., 3.3 mmol). The mixture was stirred at room temperature for 21.5 h. Then Et<sub>3</sub>N (0.46 mL, 2.2 equiv., 3.3 mmol) was added to the mixture and stirred further 1 h. The mixture was concentrated *in vacuo*. The residue was dissolved in AcOEt (15 mL, 0.1 M) and added *N*-methylaniline (161 mg, 1.5 mmol) and Et<sub>3</sub>N (0.42 mL, 2.0 equiv., 3 mmol). The mixture was stirred at 80 °C in oil bath for 2 hours. After the whole was cooled to room temperature, H<sub>2</sub>O (20 mL) was added to the mixture. The whole was extracted with AcOEt (3 x 20 mL). The combined organic layer was washed with brine (20 mL), dried over Na<sub>2</sub>SO<sub>4</sub>, filtered, and concentrated *in vacuo*. The residue was purified by silica gel column chromatography using hexane/AcOEt (3/1 v/v) to give **8la**.

White solid (623 mg, 91% yield; mp 167–169 °C). IR (KBr)  $\nu$ : 3467, 3064, 3029, 2950, 2817, 1600, 1504, 1355, 1164, 765, 609 cm<sup>-1</sup>. <sup>1</sup>H NMR (600 MHz, CDCl<sub>3</sub>)  $\delta$  7.92 (d, *J* = 8.4 Hz, 2H), 7.71 (d, *J* = 8.4 Hz, 1H), 7.66 (d, *J* = 9.0 Hz, 2H), 7.54 (d, *J* = 6.6 Hz, 2H), 7.47 (dd, *J* = 7.2, 7.2 Hz, 2H), 7.42 (dd, *J* = 7.2, 7.2 Hz, 1H), 7.38 (dd, *J* = 7.8, 7.8 Hz, 1H), 7.25 (dd, *J* = 7.2, 7.2 Hz, 2H), 7.15 (d, *J* = 7.8 Hz, 1H), 7.10 (ddd, *J* = 7.2, 7.2, 0.6 Hz, 1H), 6.89 (d, *J* = 8.4 Hz, 2H), 6.81 (dd, *J* = 7.2, 7.2 Hz, 1H), 5.62 (dd, *J* = 2.4, 2.4 Hz, 1H), 5.22 (d, *J* = 1.8 Hz, 1H), 3.74 (d, *J* = 2.4 Hz, 1H), 1.96 (s, 3H); <sup>13</sup>C {<sup>1</sup>H} NMR (151 MHz, CDCl<sub>3</sub>)  $\delta$  149.3, 146.7, 140.8, 138.9, 136.8, 130.1, 129.5, 129.3, 128.9, 128.01, 128.01, 127.6, 127.4, 126.5, 124.5, 118.4, 114.5, 114.2, 90.2, 67.5, 33.1. HRMS (ESI) *m/z*: [M+Na]<sup>+</sup> Calcd for C<sub>27</sub>H<sub>24</sub>N<sub>2</sub>O<sub>3</sub>SNa 479.1405; Found 479.1403.

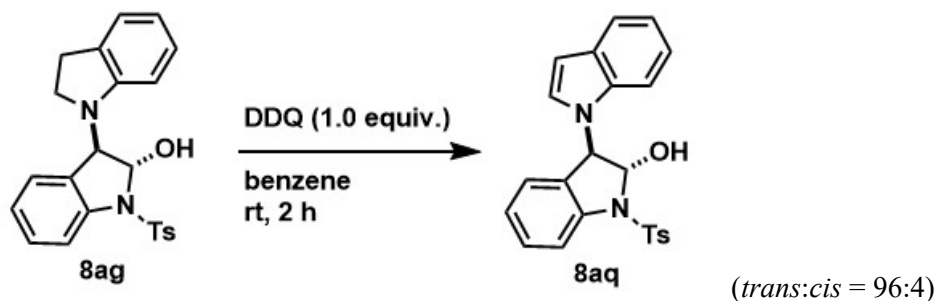

**(rac)-trans-3-(1*H*-indol-1-yl)-1-tosylindolin-2-ol (8aq).**<sup>[5]</sup> To a solution of **8ag** (582 mg, 1 mmol) in benzene (5 mL, 0.2 M) was added DDQ (227 mg, 1.0 equiv., 1 mmol). The mixture was stirred at room temperature for 2 h. After the whole was quenched with sat. NaHCO<sub>3</sub> (5 mL), the mixture was extracted with AcOEt (3 x 20 mL). The combined organic layer was washed with brine (20 mL), dried over Na<sub>2</sub>SO<sub>4</sub>, filtered, and concentrated

*in vacuo*. The residue was purified by silica gel column chromatography using hexane/AcOEt (3/1 v/v) to give **8aq**.

Pale-brown oil (406 mg, quant). IR (KBr)  $\nu$ : 3048, 2923, 1596, 1457, 1353, 1166, 742, 576  $\text{cm}^{-1}$ .  $^1\text{H}$  NMR (600 MHz,  $\text{CDCl}_3$ )  $\delta$  7.76 (d,  $J = 8.4$  Hz, 1H), 7.622–7.608 (m, 1H), 7.615 (d,  $J = 8.4$  Hz, 2H), 7.44 (dd,  $J = 7.8, 7.8$  Hz, 1H), 7.16–7.07 (m, 7H), 6.25 (d,  $J = 3.0$  Hz, 1H), 6.08 (br s, 1H), 5.77 (d,  $J = 1.8$  Hz, 1H), 5.65 (s, 1H), 4.03 (d,  $J = 2.4$  Hz, 1H), 2.42 (s, 3H);  $^{13}\text{C}\{^1\text{H}\}$  NMR (151 MHz,  $\text{CDCl}_3$ )  $\delta$  144.8, 141.3, 135.9, 134.8, 130.8, 130.1, 129.5, 127.1, 126.7, 126.6, 125.1, 124.7, 122.0, 121.2, 120.3, 115.0, 109.9, 102.4, 91.9, 64.1, 21.5. HRMS (ESI)  $m/z$ :  $[\text{M}+\text{Na}]^+$  Calcd for  $\text{C}_{23}\text{H}_{20}\text{N}_2\text{O}_3\text{SNa}$  427.1092; Found 427.1088.

### Scheme S1. C1 deletion reactions of indoline hemiaminals

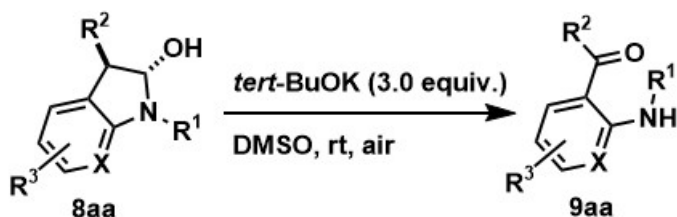

**General Procedure:** To a solution of **8** (0.5 mmol) in DMSO (2.5 mL, 0.2 M) was added *tert*-BuOK (168.3 mg, 1.5 mmol, 3.0 equiv.) under air condition. The mixture was stirred at room temperature until the complete disappearance of starting materials as indicated by TLC. After H<sub>2</sub>O (20 mL) was added to the mixture, the whole was extracted with AcOEt (3 x 20 mL) and washed with brine (5 x 20 mL). The combined organic layer was dried over Na<sub>2</sub>SO<sub>4</sub>, filtered, and concentrated *in vacuo*. The residue was purified by silica gel column chromatography using hexane/AcOEt solvent mixture as the eluent.

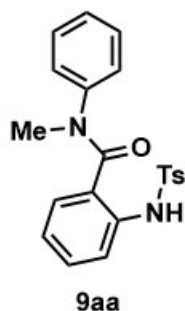

**N-Methyl-2-((4-methylphenyl)sulfonamido)-N-phenylbenzamide (9aa).** The reaction was performed according to the general procedure used 394.5 mg (1 mmol) of **8aa**. Purification by column chromatography on silica gel using hexane/AcOEt (2/1 v/v) to give **9aa**.

Pale-yellow solid (308 mg, 81% yield; mp 179–180 °C). IR (KBr)  $\nu$ : 3226, 3062, 2983, 2958, 2917, 1623, 1583, 1484, 1369, 1166, 1089, 765, 563 cm<sup>-1</sup>. <sup>1</sup>H NMR (600 MHz, CDCl<sub>3</sub>)  $\delta$  9.33 (br s, 1H), 7.80 (d, *J* = 8.4 Hz, 2H), 7.65 (d, *J* = 8.4 Hz, 1H), 7.27 (d, *J* = 7.8 Hz, 2H), 7.16 (dd, *J* = 7.8, 7.8, 1.2 Hz, 1H), 7.09–7.04 (m, 3H), 6.66 (d, *J* = 7.8 Hz, 1H), 6.62 (dd, *J* = 7.2, 7.2 Hz, 1H), 6.35 (d, *J* = 6.0 Hz, 2H), 3.40 (s, 3H), 2.35 (s, 3H); <sup>13</sup>C {<sup>1</sup>H} NMR (151 MHz, CDCl<sub>3</sub>)  $\delta$  169.3, 144.3, 144.0, 137.4, 137.3, 131.0, 130.1, 129.8, 129.2, 127.6, 126.8, 126.3, 124.6, 123.0, 122.4, 38.5, 21.6. HRMS (ESI) *m/z*: [M+Na]<sup>+</sup> Calcd for C<sub>21</sub>H<sub>20</sub>N<sub>2</sub>O<sub>3</sub>SNa 403.1092; Found 403.1091.

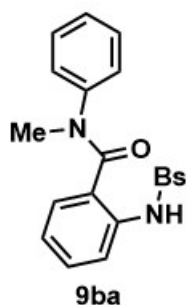

***N*-Methyl-*N*-phenyl-2-(phenylsulfonamido)benzamide (9ba).** The reaction was performed according to the general procedure used 190 mg (0.5 mmol) of **8ba**. Purification by column chromatography on silica gel using hexane/AcOEt (2/1 v/v) to give **9ba**.

White solid (160 mg, 87% yield; mp 140–142 °C). IR (KBr)  $\nu$ : 3235, 3058, 2942, 1629, 1590, 1488, 1376, 1168, 752, 582  $\text{cm}^{-1}$ .  $^1\text{H}$  NMR (600 MHz,  $\text{CDCl}_3$ )  $\delta$  9.42 (br s, 1H), 7.91 (d,  $J = 7.2$  Hz, 2H), 7.65 (dd,  $J = 8.4, 1.2$  Hz, 1H), 7.55–7.52 (m, 1H), 7.48 (dd,  $J = 7.8, 7.8$  Hz, 2H), 7.15 (dd,  $J = 7.8, 7.8$  Hz, 1H), 7.07–7.04 (m, 3H), 6.66 (d,  $J = 7.2$  Hz, 1H), 6.62 (dd,  $J = 7.2, 7.2$  Hz, 1H), 6.34 (br s, 2H), 3.38 (s, 3H);  $^{13}\text{C}$   $\{^1\text{H}\}$  NMR (151 MHz,  $\text{CDCl}_3$ )  $\delta$  169.2, 144.1, 140.3, 137.0, 133.2, 131.0, 130.1, 129.3, 129.2, 127.4, 126.8, 126.2, 124.6, 123.2, 122.5, 38.5. HRMS (ESI)  $m/z$ :  $[\text{M}+\text{Na}]^+$  Calcd for  $\text{C}_{20}\text{H}_{18}\text{N}_2\text{O}_3\text{SNa}$  389.0936; Found 389.0932.

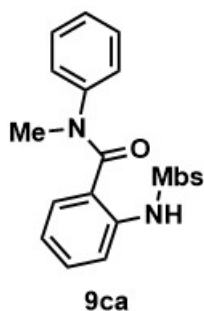

**2-((4-Methoxyphenyl)sulfonamido)-*N*-methyl-*N*-phenylbenzamide (9ca).** The reaction was performed according to the general procedure used 205 mg (0.5 mmol) of **8ca**. Purification by column chromatography on silica gel using hexane/AcOEt (2/1 v/v) to give **9ca**.

White solid (185 mg, 93% yield; mp 120–122 °C). IR (KBr)  $\nu$ : 3280, 3056, 3008, 2975, 2940, 2902, 2840, 1625, 1592, 1492, 1367, 1263, 1155, 755, 566  $\text{cm}^{-1}$ .  $^1\text{H}$  NMR (600 MHz,  $\text{CDCl}_3$ )  $\delta$  9.25 (br s, 1H), 7.84 (d,  $J = 7.8$  Hz, 2H), 7.63 (d,  $J = 8.4$  Hz, 1H), 7.14 (dd,  $J = 7.8, 7.8$  Hz, 1H), 7.084–7.078 (m, 3H), 6.93 (d,  $J = 8.4$  Hz, 2H), 6.68 (d,  $J = 7.8$  Hz, 1H), 6.62 (dd,  $J = 7.2, 7.2$  Hz, 1H), 6.46 (br s, 2H), 3.79 (s, 3H), 3.40 (s, 3H);  $^{13}\text{C}$   $\{^1\text{H}\}$  NMR (151 MHz,  $\text{CDCl}_3$ )  $\delta$  169.3, 163.3, 144.3, 137.4, 131.9, 131.0, 130.1, 129.6, 129.3, 126.8, 126.3, 124.5, 123.0, 122.2, 114.3, 55.7, 38.5. HRMS (ESI)  $m/z$ :  $[\text{M}+\text{Na}]^+$  Calcd for  $\text{C}_{21}\text{H}_{20}\text{N}_2\text{O}_4\text{SNa}$  419.1042; Found 419.1038.



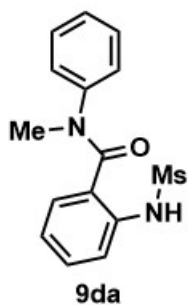

***N*-Methyl-2-(methanesulfonylamido)-*N*-phenylbenzamide (9da).** The reaction was performed according to the general procedure used 159 mg (0.5 mmol) of **8da**. Purification by column chromatography on silica gel using hexane/AcOEt (2/1 v/v) to give **9aa**.

Pale-yellow oil (65.7 mg, 43% yield). IR (KBr)  $\nu$ : 3262, 3064, 3029, 2931, 1627, 1592, 1494, 1330, 1155, 759, 700, 518  $\text{cm}^{-1}$ .  $^1\text{H}$  NMR (600 MHz,  $\text{CDCl}_3$ )  $\delta$  8.69 (br s, 1H), 7.55 (d,  $J = 8.4$  Hz, 1H), 7.24 (dd,  $J = 7.8, 7.8$  Hz, 2H), 7.21 (dd,  $J = 8.4, 8.4$  Hz, 1H), 7.16 (dd,  $J = 7.2, 7.2$  Hz, 1H), 7.03 (d,  $J = 7.8$  Hz, 2H), 6.87 (d,  $J = 7.8$  Hz, 1H), 6.72 (dd,  $J = 7.8, 7.8$  Hz, 1H), 3.49 (s, 3H), 3.13 (s, 3H);  $^{13}\text{C}\{^1\text{H}\}$  NMR (151 MHz,  $\text{CDCl}_3$ )  $\delta$  169.5, 144.3, 137.4, 131.1, 130.2, 129.6, 127.2, 126.5, 124.0, 122.7, 119.5, 40.4, 38.5. HRMS (ESI)  $m/z$ :  $[\text{M}+\text{Na}]^+$  Calcd for  $\text{C}_{15}\text{H}_{16}\text{N}_2\text{O}_3\text{SNa}$  327.0779; Found 327.0779.

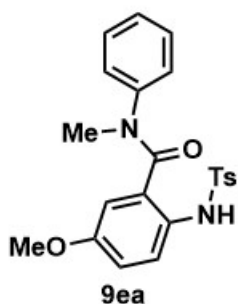

**5-Methoxy-*N*-methyl-2-((4-methylphenyl)sulfonylamido)-*N*-phenylbenzamide (9ea).** The reaction was performed according to the general procedure used 212 mg (0.5 mmol) of **8ea**. Purification by column chromatography on silica gel using hexane/AcOEt (2/1 v/v) to give **9ea**.

Pale-brown solid (134 mg, 60% yield; mp 116–118  $^{\circ}\text{C}$ ). IR (KBr)  $\nu$ : 3195, 3095, 3052, 3000, 2956, 2929, 2830, 1621, 1589, 1496, 1367, 1268, 1160, 765, 701, 541  $\text{cm}^{-1}$ .  $^1\text{H}$  NMR (600 MHz,  $\text{CDCl}_3$ )  $\delta$  9.09 (br s, 1H), 7.76 (d,  $J = 7.8$  Hz, 2H), 7.57 (d,  $J = 9.0$  Hz, 1H), 7.27 (d,  $J = 9.0$  Hz, 2H), 7.12–7.06 (m, 3H), 6.74 (dd,  $J = 9.0, 3.0$  Hz, 1H), 6.26 (br s, 2H), 6.13 (br s, 1H), 3.38 (s, 3H), 3.28 (s, 3H), 2.34 (s, 3H);  $^{13}\text{C}\{^1\text{H}\}$  NMR (151 MHz,  $\text{CDCl}_3$ )  $\delta$  168.7, 155.3, 144.4, 144.0, 137.5, 130.2, 129.7, 129.3, 127.7, 126.9, 126.3, 125.6, 117.9, 114.4, 55.3, 38.5, 21.6. HRMS (ESI)  $m/z$ :  $[\text{M}+\text{Na}]^+$  Calcd for  $\text{C}_{22}\text{H}_{22}\text{N}_2\text{O}_4\text{SNa}$  433.1195; Found 433.1198.

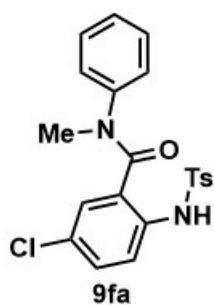

**5-Chloro-*N*-methyl-2-((4-methylphenyl)sulfonamido)-*N*-phenylbenzamide (9fa).** The reaction was performed according to the general procedure used 214 mg (0.5 mmol) of **8fa**. Purification by column chromatography on silica gel using hexane/AcOEt (2/1 v/v) to give **9fa**.

Pale-brown solid (156 mg, 75% yield; mp 163 °C). IR (KBr)  $\nu$ : 3266, 3056, 2927, 2877, 1631, 1589, 1492, 1375, 1166, 1091, 767, 700, 570  $\text{cm}^{-1}$ .  $^1\text{H}$  NMR (600 MHz,  $\text{CDCl}_3$ )  $\delta$  9.19 (br s, 1H), 7.79 (d,  $J = 8.4$  Hz, 2H), 7.60 (d,  $J = 8.4$  Hz, 1H), 7.29 (d,  $J = 7.8$  Hz, 2H), 7.16–7.10 (m, 4H), 6.61 (br s, 1H), 6.37 (br s, 2H), 3.40 (s, 3H), 2.37 (s, 3H);  $^{13}\text{C}$   $\{^1\text{H}\}$  NMR (151 MHz,  $\text{CDCl}_3$ )  $\delta$  167.9, 144.3, 143.8, 137.2, 135.9, 131.0, 129.94, 129.94, 129.5, 128.7, 127.6, 127.4, 126.3, 125.9, 123.8, 38.5, 21.7. HRMS (ESI)  $m/z$ :  $[\text{M}+\text{Na}]^+$  Calcd for  $\text{C}_{21}\text{H}_{19}\text{ClN}_2\text{O}_3\text{SNa}$  437.0703, 439.0673; Found 437.0701, 439.0678.

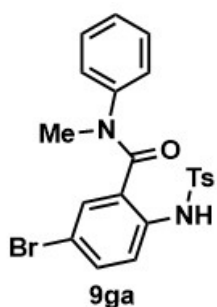

**5-Bromo-*N*-methyl-2-((4-methylphenyl)sulfonamido)-*N*-phenylbenzamide (9ga).** The reaction was performed according to the general procedure used 236 mg (0.5 mmol) of **8ga**. Purification by column chromatography on silica gel using hexane/AcOEt (2/1 v/v) to give **9ga**.

White solid (134 mg, 58% yield; mp 161–163 °C). IR (KBr)  $\nu$ : 3270, 3052, 3031, 2925, 2877, 1646, 1590, 1492, 1328, 1166, 1089, 763, 703, 578  $\text{cm}^{-1}$ .  $^1\text{H}$  NMR (600 MHz,  $\text{CDCl}_3$ )  $\delta$  9.20 (br s, 1H), 7.78 (d,  $J = 8.4$  Hz, 2H), 7.54 (d,  $J = 9.0$  Hz, 1H), 7.29 (d,  $J = 8.4$  Hz, 2H), 7.26–7.25 (m, 1H), 7.15 (dd,  $J = 7.8, 7.8$  Hz, 1H), 7.11 (dd,  $J = 7.2, 7.2$  Hz, 2H), 6.76 (br s, 1H), 6.38 (br s, 2H), 3.39 (s, 3H), 2.37 (s, 3H);  $^{13}\text{C}$   $\{^1\text{H}\}$  NMR (151 MHz,  $\text{CDCl}_3$ )  $\delta$  167.7, 144.3, 143.8, 137.1, 136.3, 133.8, 132.9, 129.9, 129.5, 127.6, 127.4, 126.3, 126.1, 123.9, 116.0, 38.5, 21.7. HRMS (ESI)  $m/z$ :  $[\text{M}+\text{Na}]^+$  Calcd for  $\text{C}_{21}\text{H}_{19}\text{BrN}_2\text{O}_3\text{SNa}$  481.0198, 483.0177; Found 481.0201, 483.0177.

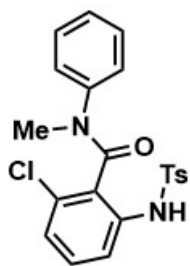

**9ha** (containing rotamer)

**4-Chloro-N-methyl-2-((4-methylphenyl)sulfonamido)-N-phenylbenzamide (9ha).** The reaction was performed according to the general procedure used 214 mg (0.5 mmol) of **8ha**. Purification by column chromatography on silica gel using hexane/AcOEt (2/1 v/v) to give **9ha**.

White solid (167 mg, 81% yield; mp 150–153 °C, containing rotamer). IR (KBr)  $\nu$ : 3280, 3116, 3052, 2954, 2923, 2877, 1639, 1592, 1492, 1369, 1168, 1091, 941, 769, 700, 543  $\text{cm}^{-1}$ .  $^1\text{H}$  NMR (600 MHz,  $\text{CDCl}_3$ )  $\delta$  7.86 (d,  $J = 9.0$  Hz, 1.5H), 7.77 (d,  $J = 9.0$  Hz, 0.50H), 7.68 (br s, 0.75H), 7.56 (d,  $J = 8.4$  Hz, 0.25H), 7.47 (dd,  $J = 7.2, 7.2$  Hz, 0.5H), 7.42 (br s, 0.25H), 7.35 (ddd,  $J = 7.2, 7.2, 1.2$  Hz, 0.25H), 7.31–7.28 (m, 3.5H), 7.20 (dd,  $J = 8.4, 1.2$  Hz, 0.25H), 7.12–7.07 (m, 2.25H), 6.99 (dd, 8.4, 8.4 Hz, 0.75H), 6.90 (d,  $J = 7.8$  Hz, 1.5H), 6.72 (d,  $J = 6.6$  Hz, 0.75H), 3.51 (s, 2.25H), 2.84 (s, 0.75H), 2.39 (s, 0.75H), 2.38 (s, 2.25H);  $^{13}\text{C}\{^1\text{H}\}$  NMR (151 MHz,  $\text{CDCl}_3$ )  $\delta$  166.4, 166.1, 144.6, 144.5, 142.1, 142.0, 137.2, 137.0, 136.4, 135.6, 131.1, 130.9, 130.7, 130.6, 130.1, 130.0, 129.6, 128.7, 128.5, 127.8, 127.5, 127.46, 127.46, 126.6, 126.2, 126.1, 125.9, 124.6, 121.6, 116.9, 39.0, 37.4, 21.71, 21.68. HRMS (ESI)  $m/z$ :  $[\text{M}+\text{Na}]^+$  Calcd for  $\text{C}_{21}\text{H}_{19}\text{ClN}_2\text{O}_3\text{SNa}$  437.0703, 439.0673; Found 437.0702, 439.0677.

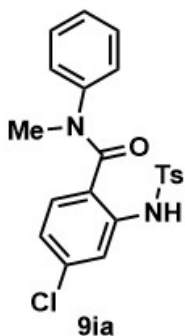

**9ia**

**6-Chloro-N-methyl-2-((4-methylphenyl)sulfonamido)-N-phenylbenzamide (9ia).** The reaction was performed according to the general procedure used 214 mg (0.5 mmol) of **8ia**. Purification by column chromatography on silica gel using hexane/AcOEt (2/1 v/v) to give **9ia**.

Pale-yellow solid (163 mg, 79% yield; mp 164 °C). IR (KBr)  $\nu$ : 3147, 3089, 2985, 2946, 2921, 1621, 1583, 1492, 1326, 1164, 935, 767, 713, 563  $\text{cm}^{-1}$ .  $^1\text{H}$  NMR (600 MHz,  $\text{CDCl}_3$ )  $\delta$  9.43 (br s, 1H), 7.82 (d,  $J = 7.8$  Hz, 2H), 7.69 (d,  $J = 1.8$  Hz, 1H), 7.31 (d,  $J = 8.4$  Hz, 2H), 7.12 (dd,  $J = 7.2, 7.2$  Hz, 1H), 7.09 (dd,  $J = 7.8, 7.8$  Hz, 2H), 6.59 (d,  $J = 8.4$  Hz, 1H), 6.56 (d,  $J = 8.4$  Hz, 1H), 6.37 (d,  $J = 7.2$  Hz, 1H), 3.4 (s, 3H), 2.38 (s, 3H);  $^{13}\text{C}\{^1\text{H}\}$  NMR (151 MHz,  $\text{CDCl}_3$ )  $\delta$  168.6, 144.4, 144.1, 138.8, 137.1, 137.0, 131.1, 130.0, 129.5, 127.6, 127.1, 126.3, 123.2, 122.5, 122.2, 38.6, 21.7. HRMS (ESI)  $m/z$ :  $[\text{M}+\text{Na}]^+$  Calcd for  $\text{C}_{21}\text{H}_{19}\text{ClN}_2\text{O}_3\text{SNa}$  437.0703,

439.0673; Found 437.0708, 439.0677.

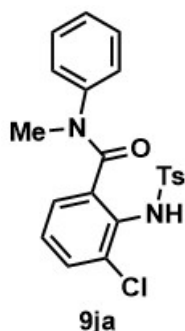

**7-Chloro-N-methyl-2-((4-methylphenyl)sulfonamido)-N-phenylbenzamide (9ja).** The reaction was performed according to the general procedure used 214 mg (0.5 mmol) of **8ja**. Purification by column chromatography on silica gel using hexane/AcOEt (2/1 v/v) to give **9ja**.

Pale-yellow oil (134 mg, 63% yield). IR (KBr)  $\nu$ : 3062, 3031, 2917, 2859, 2840, 1627, 1592, 1496, 1336, 1155, 1091, 935, 806, 703, 665, 499  $\text{cm}^{-1}$ .  $^1\text{H}$  NMR (600 MHz,  $\text{CDCl}_3$ )  $\delta$  7.77 (d,  $J = 8.4$  Hz, 2H), 7.45 (br s, 1H), 7.36–7.09 (m, 9H), 6.95 (dd,  $J = 7.2, 7.2$  Hz, 1H), 2.99 (s, 3H), 2.40 (s, 3H);  $^{13}\text{C}$   $\{^1\text{H}\}$  NMR (151 MHz,  $\text{CDCl}_3$ )  $\delta$  167.9, 144.03, 144.03, 143.8, 137.1, 135.3, 132.8, 131.43, 131.36, 129.5, 129.0, 128.9, 127.58, 127.58, 127.2, 126.7, 38.0, 21.6. HRMS (ESI)  $m/z$ :  $[\text{M}+\text{Na}]^+$  Calcd for  $\text{C}_{21}\text{H}_{19}\text{ClN}_2\text{O}_3\text{SNa}$  437.0703, 439.0673; Found 437.0704, 439.0678.

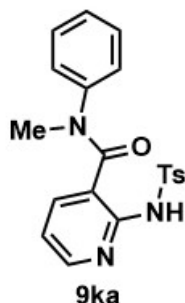

**N-Methyl-2-((4-methylphenyl)sulfonamido)-N-phenylnicotinamide (9ka).** The reaction was performed according to the general procedure used 197 mg (0.5 mmol) of **8ka**. Purification by column chromatography on silica gel using hexane/AcOEt (2/1 v/v) to give **9ka**.

Pale-brown oil (70.7 mg, 37% yield). IR (KBr)  $\nu$ : 3218, 3087, 3037, 2925, 1650, 1581, 1494, 1280, 1141, 1085, 773, 566  $\text{cm}^{-1}$ .  $^1\text{H}$  NMR (600 MHz,  $\text{CDCl}_3$ )  $\delta$  9.58 (br s, 1H), 8.06 (br s 1H), 8.04 (d,  $J = 6.6$  Hz, 2H), 7.27 (d,  $J = 7.8$  Hz, 2H), 7.26–7.23 (m, 2H), 7.19 (dd,  $J = 7.2, 7.2$  Hz, 1H), 7.004–6.992 (m, 1H), 6.998 (d,  $J = 7.2$  Hz, 2H), 6.48 (br s, 1H), 3.48 (s, 3H), 2.39 (s, 3H);  $^{13}\text{C}$   $\{^1\text{H}\}$  NMR (151 MHz,  $\text{CDCl}_3$ )  $\delta$  168.2, 150.6, 149.4, 144.0, 143.8, 138.3, 137.5, 129.8, 129.3, 128.5, 127.5, 126.7, 116.7, 116.1, 38.7, 21.7. HRMS (ESI)  $m/z$ :  $[\text{M}+\text{Na}]^+$  Calcd for  $\text{C}_{20}\text{H}_{19}\text{N}_3\text{O}_3\text{SNa}$  404.1045; Found 404.1043.

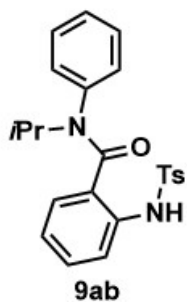

***N*-Isopropyl-2-((4-methylphenyl)sulfonamido)-*N*-phenylbenzamide (9ab).** The reaction was performed according to the general procedure used 211 mg (0.5 mmol) of **8ab**. Purification by column chromatography on silica gel using hexane/AcOEt (2/1 v/v) to give **9ab**.

Pale-yellow solid (187 mg, 92% yield; mp 120–123 °C). IR (KBr)  $\nu$ : 3218, 3062, 3029, 2969, 2933, 2877, 1617, 1589, 1488, 1376, 1159, 1093, 761, 705, 565  $\text{cm}^{-1}$ .  $^1\text{H}$  NMR (600 MHz,  $\text{CDCl}_3$ )  $\delta$  9.18 (br s, 1H), 7.77 (d,  $J$  = 8.4 Hz, 2H), 7.60 (dd,  $J$  = 8.4, 0.6 Hz, 1H), 7.27 (d,  $J$  = 8.4 Hz, 2H), 7.10 (dd,  $J$  = 7.8, 7.8 Hz, 1H), 7.06 (dd,  $J$  = 7.2, 7.2 Hz, 1H), 7.02 (dd,  $J$  = 7.8, 7.8 Hz, 2H), 6.67 (d,  $J$  = 6.0 Hz, 1H), 6.57 (dd,  $J$  = 7.2, 7.2 Hz, 1H), 6.31 (br s, 2H), 4.94 (br s, 1H), 2.37 (s, 3H), 1.13 (d,  $J$  = 7.2 Hz, 6H);  $^{13}\text{C}$   $\{^1\text{H}\}$  NMR (151 MHz,  $\text{CDCl}_3$ )  $\delta$  169.2, 143.9, 139.3, 137.7, 136.7, 130.4, 129.9, 129.7, 128.7, 127.6, 127.4, 125.7, 122.8, 121.7, 48.6, 21.6, 20.9. HRMS (ESI)  $m/z$ :  $[\text{M}+\text{Na}]^+$  Calcd for  $\text{C}_{23}\text{H}_{24}\text{N}_2\text{O}_3\text{SNa}$  431.1405; Found 431.1403.

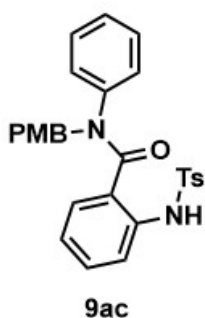

***N*-(4-Methoxybenzyl)-2-((4-methylphenyl)sulfonamido)-*N*-phenylbenzamide (9ac).** The reaction was performed according to the general procedure used 250 mg (0.5 mmol) of **8ac**. Purification by column chromatography on silica gel using hexane/AcOEt (2/1 v/v) to give **9ac**.

Pale-yellow solid (201 mg, 83% yield; mp 128–130 °C). IR (KBr)  $\nu$ : 3237, 3073, 3045, 2996, 2948, 2836, 1621, 1585, 1488, 1380, 1245, 1162, 1031, 910, 754, 703, 565  $\text{cm}^{-1}$ .  $^1\text{H}$  NMR (600 MHz,  $\text{CDCl}_3$ )  $\delta$  9.47 (br s, 1H), 7.72 (dd,  $J$  = 8.4, 0.6 Hz, 1H), 7.59 (d,  $J$  = 8.4 Hz, 2H), 7.14–7.11 (m, 3H), 7.04 (dd,  $J$  = 7.8, 7.8 Hz, 1H), 6.97 (d,  $J$  = 8.4 Hz, 2H), 6.94 (dd,  $J$  = 7.8, 7.8 Hz, 2H), 6.85 (d,  $J$  = 8.4 Hz, 2H), 6.69 (d,  $J$  = 7.2 Hz, 1H), 6.59 (dd,  $J$  = 7.2, 7.2 Hz, 1H), 6.04 (d,  $J$  = 7.2 Hz, 2H), 4.95 (s, 2H), 3.80 (s, 3H), 2.25 (s, 3H);  $^{13}\text{C}$   $\{^1\text{H}\}$  NMR (151 MHz,  $\text{CDCl}_3$ )  $\delta$  168.9, 159.2, 143.7, 142.5, 137.3, 137.1, 130.9, 130.5, 130.1, 129.7, 129.0, 128.6, 127.3, 127.2, 126.8, 124.7, 123.1, 122.6, 113.7, 55.3, 53.3, 21.4. HRMS (ESI)  $m/z$ :  $[\text{M}+\text{Na}]^+$  Calcd for  $\text{C}_{28}\text{H}_{26}\text{N}_2\text{O}_4\text{SNa}$  509.1511; Found 509.1511.

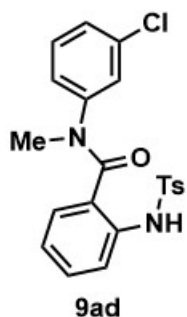

***N*-Chloro-2-((4-methylphenyl)sulfonamido)-*N*-phenylbenzamide (9ad).** The reaction was performed according to the general procedure used 214 mg (0.5 mmol) of **8ad**. Purification by column chromatography on silica gel using hexane/AcOEt (2/1 v/v) to give **9ad**.

Brown oil (126 mg, 50% yield). IR (KBr)  $\nu$ : 3208, 3079, 2956, 2913, 1627, 1585, 1486, 1361, 1166, 1089, 763, 715  $\text{cm}^{-1}$ .  $^1\text{H}$  NMR (600 MHz,  $\text{CDCl}_3$ )  $\delta$  9.27 (br s, 1H), 7.79 (d,  $J = 7.8$  Hz, 2H), 7.65 (d,  $J = 7.8$  Hz, 1H), 7.27 (d,  $J = 7.8$  Hz, 2H), 7.21 (dd,  $J = 7.8, 7.8$  Hz, 1H), 7.08 (d,  $J = 7.8$  Hz, 1H), 6.97 (dd,  $J = 8.4, 8.4$  Hz, 1H), 6.71–6.66 (m, 2H), 6.51 (s, 1H), 6.18 (d,  $J = 6.6$  Hz, 1H), 3.39 (s, 3H), 2.34 (s, 3H);  $^{13}\text{C}$   $\{^1\text{H}\}$  NMR (151 MHz,  $\text{CDCl}_3$ )  $\delta$  169.1, 145.4, 144.1, 137.32, 137.32, 134.7, 131.4, 129.96, 129.96, 130.0, 127.5, 127.1, 126.21, 126.21, 124.7, 123.3, 123.0, 38.6, 21.6. HRMS (ESI)  $m/z$ :  $[\text{M}+\text{Na}]^+$  Calcd for  $\text{C}_{21}\text{H}_{19}\text{ClN}_2\text{O}_3\text{SNa}$  437.0703, 439.0673; Found 437.0698, 439.0671.

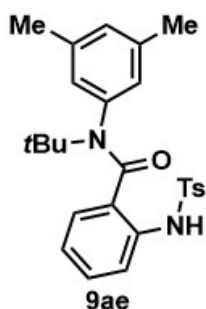

***N*-(*tert*-Butyl)-*N*-(3,5-dimethylphenyl)-2-((4-methylphenyl)sulfonamido)benzamide (9ae).** The reaction was performed according to the general procedure used 232 mg (0.5 mmol) of **8ae**. Purification by column chromatography on silica gel using hexane/AcOEt (2/1 v/v) to give **9ae**.

White solid (317 mg, 70% yield; mp 149  $^{\circ}\text{C}$ ). IR (KBr)  $\nu$ : 3166, 2979, 2960, 2921, 2863, 1617, 1587, 1486, 1367, 1267, 1160, 1093, 937, 759, 715  $\text{cm}^{-1}$ .  $^1\text{H}$  NMR (600 MHz,  $\text{CDCl}_3$ )  $\delta$  8.66 (br s, 1H), 7.85 (d,  $J = 8.4$  Hz, 2H), 7.29 (d,  $J = 8.4$  Hz, 2H), 7.28 (dd,  $J = 7.8, 0.6$  Hz, 1H), 6.94 (ddd,  $J = 7.8, 7.8, 1.2$  Hz, 1H), 6.79 (dd,  $J = 7.8, 1.2$  Hz, 1H), 6.72 (s, 1H), 6.58 (ddd,  $J = 7.2, 7.2, 0.6$  Hz, 1H), 6.42 (s, 2H), 2.40 (s, 3H), 2.12 (s, 6H), 1.49 (s, 9H);  $^{13}\text{C}$   $\{^1\text{H}\}$  NMR (151 MHz,  $\text{CDCl}_3$ )  $\delta$  170.4, 143.7, 140.9, 138.1, 137.8, 135.6, 129.9, 129.5, 129.4, 128.8, 128.1, 127.8, 127.4, 122.2, 119.5, 59.5, 29.2, 21.7, 21.1. HRMS (ESI)  $m/z$ :  $[\text{M}+\text{Na}]^+$  Calcd for  $\text{C}_{26}\text{H}_{30}\text{N}_2\text{O}_3\text{SNa}$  473.1875; Found 473.1877.

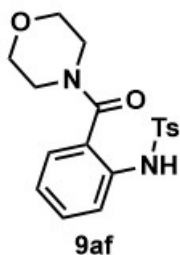

**4-Methyl-N-(2-(morpholine-4-carbonyl)phenyl)benzenesulfonamide (9af).** The reaction was performed according to the general procedure used 187 mg (0.5 mmol) of **8af**. Purification by column chromatography on silica gel using hexane/AcOEt (2/1 v/v) to give **9af**.

Pale-yellow oil (136 mg, 76% yield). IR (KBr)  $\nu$ : 3216, 3064, 2965, 2921, 2857, 1619, 1596, 1490, 1338, 1164, 763, 721, 565  $\text{cm}^{-1}$ .  $^1\text{H}$  NMR (600 MHz,  $\text{CDCl}_3$ )  $\delta$  8.51 (br s, 1H), 7.65 (d,  $J = 7.8$  Hz, 2H), 7.62 (dd,  $J = 8.4, 1.2$  Hz, 1H), 7.36 (dd,  $J = 7.2, 7.2$  Hz, 1H), 7.21 (d,  $J = 7.8$  Hz, 2H), 7.09–7.06 (m, 2H), 3.61–3.11 (m, 8H), 2.36 (s, 3H);  $^{13}\text{C}\{^1\text{H}\}$  NMR (151 MHz,  $\text{CDCl}_3$ )  $\delta$  168.4, 143.9, 137.0, 136.4, 131.3, 129.7, 127.8, 127.2, 125.0, 124.1, 123.7, 66.6, 48.3, 42.5, 21.5. HRMS (ESI)  $m/z$ :  $[\text{M}+\text{Na}]^+$  Calcd for  $\text{C}_{18}\text{H}_{20}\text{N}_2\text{O}_4\text{SNa}$  383.1042; Found 383.1042.

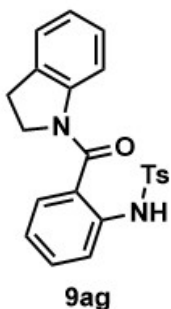

**N-(2-(Indoline-1-carbonyl)phenyl)-4-methylbenzenesulfonamide (9ag).** The reaction was performed according to the general procedure used 203 mg (0.5 mmol) of **8ag**. Purification by column chromatography on silica gel using hexane/AcOEt (2/1 v/v) to give **9ag**.

Colorless oil (128 mg, 65% yield). IR (KBr)  $\nu$ : 3251, 3064, 3031, 2958, 2923, 2857, 1625, 1589, 1482, 1338, 1164, 759, 563  $\text{cm}^{-1}$ .  $^1\text{H}$  NMR (600 MHz,  $\text{CDCl}_3$ )  $\delta$  8.67 (s, 1H), 8.16 (br s, 1H), 7.73 (d,  $J = 7.2$  Hz, 1H), 7.54 (d,  $J = 7.8$  Hz, 2H), 7.42 (dd,  $J = 7.8, 7.8$  Hz, 1H), 7.26–7.08 (m, 5H), 6.90 (d,  $J = 7.8$  Hz, 2H), 3.43 (br s, 2H), 2.87 (br s, 2H), 2.19 (br s, 3H);  $^{13}\text{C}\{^1\text{H}\}$  NMR (151 MHz,  $\text{CDCl}_3$ )  $\delta$  167.0, 143.6, 141.9, 136.6, 135.7, 131.9, 131.6, 129.44, 129.44, 127.1, 126.9, 125.6, 124.83, 124.83, 118.2, 115.5, 50.8, 28.1, 21.5. HRMS (ESI)  $m/z$ :  $[\text{M}+\text{Na}]^+$  Calcd for  $\text{C}_{22}\text{H}_{20}\text{N}_2\text{O}_3\text{SNa}$  415.1092; Found 415.1095.

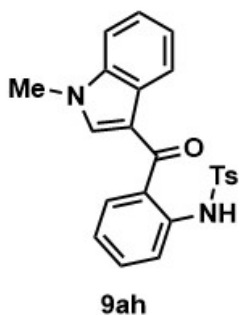

**4-Methyl-*N*-(2-(1-methyl-1*H*-indole-3-carbonyl)phenyl)benzenesulfonamide (9ah).** The reaction was performed according to the general procedure used 209 mg (0.5 mmol) of **8ah**. Purification by column chromatography on silica gel using hexane/AcOEt (2/1 v/v) to give **9ah**.

Pale-yellow oil (272 mg, 67% yield). IR (KBr)  $\nu$ : 3205, 3054, 3029, 2921, 1606, 1521, 1365, 1164, 754, 561  $\text{cm}^{-1}$ .  $^1\text{H}$  NMR (600 MHz,  $\text{CDCl}_3$ )  $\delta$  9.62 (br s, 1H), 8.20 (d,  $J = 7.8$  Hz, 1H), 7.72 (dd,  $J = 8.4, 1.2$  Hz, 1H), 7.53 (dd,  $J = 7.8, 1.8$  Hz, 1H), 7.48 (d,  $J = 8.4$  Hz, 2H), 7.45 (ddd,  $J = 7.8, 7.8, 1.8$  Hz, 1H), 7.37–7.32 (m, 3H), 7.16 (ddd,  $J = 7.8, 7.8, 1.2$  Hz, 1H), 7.09 (s, 1H), 6.79 (d,  $J = 7.8$  Hz, 2H), 3.80 (s, 3H), 2.04 (s, 3H);  $^{13}\text{C}\{^1\text{H}\}$  NMR (151 MHz,  $\text{CDCl}_3$ )  $\delta$  190.8, 143.1, 138.5, 137.4, 137.1, 136.2, 132.1, 130.6, 130.3, 129.2, 127.3, 127.0, 124.1, 124.03, 123.95, 123.1, 122.7, 115.8, 109.8, 33.7, 21.3. HRMS (ESI)  $m/z$ :  $[\text{M}+\text{Na}]^+$  Calcd for  $\text{C}_{23}\text{H}_{20}\text{N}_2\text{O}_3\text{SNa}$  427.1092; Found 417.1092.

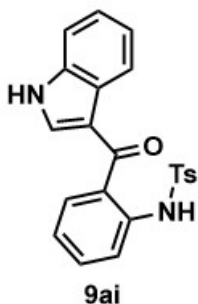

***N*-(2-(1*H*-Indole-3-carbonyl)phenyl)-4-methylbenzenesulfonamide (9ai).** The reaction was performed according to the general procedure used 202 mg (0.5 mmol) of **8ai**. Purification by column chromatography on silica gel using hexane/AcOEt (2/1 v/v) to give **9ai**.

Pale-brown (138 mg, 71% yield). IR (KBr)  $\nu$ : 3338, 3122, 3060, 2923, 2867, 1606, 1488, 1428, 1386, 1330, 1195, 1160, 923, 754, 719, 561  $\text{cm}^{-1}$ .  $^1\text{H}$  NMR (600 MHz,  $\text{CDCl}_3$ )  $\delta$  9.69 (s, 1H), 9.56 (br s, 1H), 8.22–8.20 (m, 1H), 7.71 (dd,  $J = 8.4, 1.2$  Hz, 1H), 7.53 (dd,  $J = 7.8, 1.8$  Hz, 1H), 7.47 (ddd,  $J = 7.8, 7.8, 1.2$  Hz, 1H), 7.444–7.430 (m, 1H), 7.437 (d,  $J = 8.4$  Hz, 2H), 7.31–7.29 (m, 2H), 7.17 (d,  $J = 3.0$  Hz, 1H), 7.16 (ddd,  $J = 7.8, 7.8, 0.6$  Hz, 1H), 6.74 (d,  $J = 7.8$  Hz, 2H), 2.03 (s, 3H);  $^{13}\text{C}\{^1\text{H}\}$  NMR (151 MHz,  $\text{CDCl}_3$ )  $\delta$  191.6, 143.8, 136.7, 136.4, 135.41, 135.37, 132.2, 130.8, 130.6, 129.5, 127.2, 126.1, 124.7, 124.27, 124.27, 123.1, 122.2, 116.8, 112.0, 21.3. HRMS (ESI)  $m/z$ :  $[\text{M}+\text{Na}]^+$  Calcd for  $\text{C}_{22}\text{H}_{18}\text{N}_2\text{O}_3\text{SNa}$  413.0936; Found 413.0936.



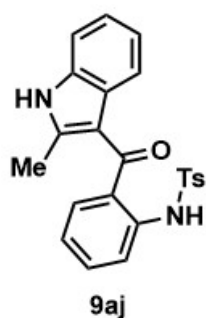

**4-Methyl-*N*-(2-(2-methyl-1*H*-indole-3-carbonyl)phenyl)benzenesulfonamide (9aj).** The reaction was performed according to the general procedure used 209 mg (0.5 mmol) of **8aj**. Purification by column chromatography on silica gel using hexane/AcOEt (2/1 v/v) to give **9aj**.

Pale-brown oil (55.1 mg, 50% yield). IR (KBr)  $\nu$ : 3336, 3056, 2921, 1606, 1486, 1378, 1159, 763, 561  $\text{cm}^{-1}$ .  $^1\text{H}$  NMR (600 MHz,  $\text{CDCl}_3$ )  $\delta$  10.00 (s, 1H), 8.90 (br s, 1H), 7.80 (dd,  $J=9.0, 1.2$  Hz, 1H), 7.57 (d,  $J=8.4$  Hz, 2H), 7.47 (ddd,  $J=7.8, 7.8, 1.2$  Hz, 1H), 7.46 (d,  $J=7.8$  Hz, 1H), 7.30 (d,  $J=8.4$  Hz, 1H), 7.14 (ddd,  $J=7.8, 7.8, 0.6$  Hz, 1H), 7.06 (ddd,  $J=7.2, 7.2, 1.2$  Hz, 1H), 6.95 (ddd,  $J=7.8, 7.8, 0.6$  Hz, 1H), 6.89 (d,  $J=8.4$  Hz, 2H), 6.76 (d,  $J=7.8$  Hz, 1H), 2.42 (s, 3H), 2.03 (s, 3H);  $^{13}\text{C}\{^1\text{H}\}$  NMR (151 MHz,  $\text{CDCl}_3$ )  $\delta$  193.4, 144.7, 143.8, 137.3, 135.9, 134.6, 132.9, 132.4, 130.0, 129.6, 127.2, 127.1, 124.2, 123.4, 122.7, 121.6, 120.9, 114.0, 110.9, 21.3, 14.6. HRMS (ESI)  $m/z$ :  $[\text{M}+\text{Na}]^+$  Calcd for  $\text{C}_{23}\text{H}_{20}\text{N}_2\text{O}_3\text{SNa}$  427.1092; Found 427.1089.

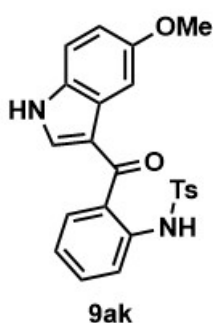

***N*-(2-(5-Methoxy-1*H*-indole-3-carbonyl)phenyl)-4-methylbenzenesulfonamide (9ak).** The reaction was performed according to the general procedure used 435 mg (0.5 mmol) of **8ak**. Purification by column chromatography on silica gel using hexane/AcOEt (2/1 v/v) to give **9ak**.

Brown oil (86.4 mg, 41% yield). IR (KBr)  $\nu$ : 3359, 3064, 2996, 2935, 2832, 1594, 1486, 1380, 1272, 1159, 1089, 811, 717, 561  $\text{cm}^{-1}$ .  $^1\text{H}$  NMR (600 MHz,  $\text{CDCl}_3$ )  $\delta$  9.60 (s, 1H), 8.95 (br s, 1H), 7.72 (s, 1H), 7.70 (d,  $J=7.8$  Hz, 1H), 7.52 (d,  $J=6.6$  Hz, 1H), 7.48 (d,  $J=7.2$  Hz, 2H), 7.45 (dd,  $J=7.2, 7.2$  Hz, 1H), 7.31 (d,  $J=7.8$  Hz, 1H), 7.18–7.14 (m, 2H), 6.95 (d,  $J=6.6$  Hz, 1H), 6.80 (d,  $J=7.2$  Hz, 2H), 3.90 (s, 3H), 2.07 (s, 3H);  $^{13}\text{C}\{^1\text{H}\}$  NMR (151 MHz,  $\text{CDCl}_3$ )  $\delta$  191.4, 156.7, 156.7, 143.5, 137.0, 135.9, 135.0, 132.1, 131.0, 130.6, 130.4, 129.4, 127.3, 127.1, 124.3, 124.0, 117.0, 114.8, 112.5, 103.7, 55.9, 21.4. HRMS (ESI)  $m/z$ :  $[\text{M}+\text{Na}]^+$  Calcd for  $\text{C}_{23}\text{H}_{20}\text{N}_2\text{O}_4\text{SNa}$  443.1042; Found 443.1039.

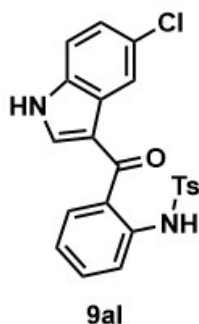

***N*-(2-(5-Chloro-1*H*-indole-3-carbonyl)phenyl)-4-methylbenzenesulfonamide (9al).** The reaction was performed according to the general procedure used 219 mg (0.5 mmol) of **8al**. Purification by column chromatography on silica gel using hexane/AcOEt (2/1 v/v) to give **9al**.

Brown oil (153 mg, 72% yield). IR (KBr)  $\nu$ : 3289, 3031, 2923, 1608, 1517, 1326, 1160, 883, 761, 561  $\text{cm}^{-1}$ .  $^1\text{H}$  NMR (600 MHz,  $\text{CDCl}_3$ )  $\delta$  9.635 (s, 1H), 9.635 (br s, 1H), 8.14 (d,  $J = 1.2$  Hz, 1H), 7.68 (d,  $J = 8.4$  Hz, 1H), 7.52 (d,  $J = 7.2$  Hz, 1H), 7.47 (dd,  $J = 7.8$  Hz, 1H), 7.44 (d,  $J = 7.8$  Hz, 2H), 7.36 (d,  $J = 8.4$  Hz, 1H), 7.23 (d,  $J = 7.8$  Hz, 1H), 7.21 (s, 1H), 7.17 (dd,  $J = 7.2, 7.2$  Hz, 1H), 6.79 (d,  $J = 7.8$  Hz, 2H), 2.04 (s, 3H);  $^{13}\text{C}\{^1\text{H}\}$  NMR (151 MHz,  $\text{CDCl}_3$ )  $\delta$  191.3, 143.9, 136.8, 136.0, 135.4, 134.7, 132.4, 130.7, 130.2, 129.5, 128.9, 127.2, 124.7, 124.6, 124.3, 121.77, 121.77, 116.4, 113.0, 21.3. HRMS (ESI)  $m/z$ :  $[\text{M}+\text{Na}]^+$  Calcd for  $\text{C}_{22}\text{H}_{17}\text{ClN}_2\text{O}_3\text{SNa}$  447.0546, 449.0517; Found 447.0551, 449.0514.

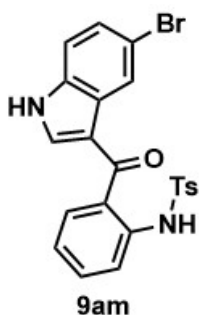

***N*-(2-(5-Bromo-1*H*-indole-3-carbonyl)phenyl)-4-methylbenzenesulfonamide (9am).** The reaction was performed according to the general procedure used 242 mg (0.5 mmol) of **8am**. Purification by column chromatography on silica gel using hexane/AcOEt (2/1 v/v) to give **9am**.

Brown oil (125 mg, 53% yield). IR (KBr)  $\nu$ : 3255, 3029, 2923, 2850, 1608, 1517, 1428, 1328, 1159, 761, 719, 559  $\text{cm}^{-1}$ .  $^1\text{H}$  NMR (600 MHz,  $\text{CDCl}_3$ )  $\delta$  9.61 (s, 1H), 8.86 (br s, 1H), 8.28 (s, 1H), 7.73 (d,  $J = 7.8$  Hz, 1H), 7.540–7.528 (m, 1H), 7.534 (d,  $J = 7.2$  Hz, 2H), 7.48 (dd,  $J = 7.2, 7.2$  Hz, 1H), 7.42 (d,  $J = 5.4$  Hz, 1H), 7.32–7.26 (m, 2H), 7.16 (dd,  $J = 6.0, 6.0$  Hz, 1H), 6.88 (d,  $J = 7.2$  Hz, 2H), 2.10 (s, 3H);  $^{13}\text{C}\{^1\text{H}\}$  NMR (151 MHz,  $\text{CDCl}_3$ )  $\delta$  191.3, 143.9, 136.9, 135.7, 135.5, 135.0, 132.5, 130.8, 130.1, 129.5, 127.7, 127.2, 124.86, 124.86, 124.6, 124.2, 116.6, 116.4, 113.4, 21.4. HRMS (ESI)  $m/z$ :  $[\text{M}+\text{Na}]^+$  Calcd for  $\text{C}_{22}\text{H}_{17}\text{BrN}_2\text{O}_3\text{SNa}$  491.0041, 493.0021; Found 491.0041, 493.0020.

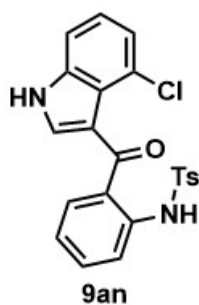

***N*-(2-(4-Chloro-1*H*-indole-3-carbonyl)phenyl)-4-methylbenzenesulfonamide (9an).** The reaction was performed according to the general procedure used 219 mg (0.5 mmol) of **8an**. Purification by column chromatography on silica gel using hexane/AcOEt (2/1 v/v) to give **9an**.

Brown oil (43.9 mg, 21% yield). IR (KBr)  $\nu$ : 3212, 3118, 3064, 3029, 2923, 2854, 1608, 1488, 1338, 1159, 1089, 734, 565  $\text{cm}^{-1}$ .  $^1\text{H}$  NMR (600 MHz,  $\text{CDCl}_3$ )  $\delta$  10.89 (s, 1H), 8.91 (br s, 1H), 7.76 (d,  $J = 8.4$  Hz, 1H), 7.72 (d,  $J = 7.8$  Hz, 2H), 7.55 (d,  $J = 7.2$  Hz, 1H), 7.45 (dd,  $J = 7.8, 7.8$  Hz, 1H), 7.36 (br s, 1H), 7.22–7.20 (m, 3H), 7.15 (d,  $J = 7.8$  Hz, 2H), 6.99 (dd,  $J = 7.8, 7.8$  Hz, 1H), 2.33 (s, 3H);  $^{13}\text{C}\{^1\text{H}\}$  NMR (151 MHz,  $\text{CDCl}_3$ )  $\delta$  193.3, 143.9, 139.5, 137.6, 136.7, 134.02, 133.99, 131.8, 129.8, 127.5, 126.9, 126.8, 124.7, 123.9, 123.5, 122.9, 120.5, 117.9, 110.6, 21.7. HRMS (ESI)  $m/z$ :  $[\text{M}+\text{Na}]^+$  Calcd for  $\text{C}_{22}\text{H}_{17}\text{ClN}_2\text{O}_3\text{SNa}$  447.0546, 449.0517; Found 447.0544, 449.0518.

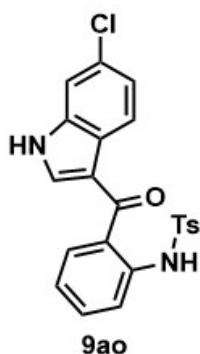

***N*-(2-(6-Chloro-1*H*-indole-3-carbonyl)phenyl)-4-methylbenzenesulfonamide (9ao).** The reaction was performed according to the general procedure used 219 mg (0.5 mmol) of **8ao**. Purification by column chromatography on silica gel using hexane/AcOEt (2/1 v/v) to give **9ao**.

Pale-brown oil (72.9 mg, 34% yield). IR (KBr)  $\nu$ : 3272, 3064, 2969, 2923, 2854, 1608, 1515, 1330, 1160, 1089, 879, 761, 727, 566  $\text{cm}^{-1}$ .  $^1\text{H}$  NMR (600 MHz,  $\text{CDCl}_3$ )  $\delta$  9.66 (s, 1H), 9.59 (br s, 1H), 8.09 (d,  $J = 8.4$  Hz, 1H), 7.68 (dd,  $J = 8.4, 1.2$  Hz, 1H), 7.52 (dd,  $J = 7.8, 1.2$  Hz, 1H), 7.47 (dd,  $J = 7.2, 7.2$  Hz, 1H), 7.45 (d,  $J = 8.4$  Hz, 2H), 7.37 (d,  $J = 1.2$  Hz, 1H), 7.24 (dd,  $J = 7.8, 1.8$  Hz, 1H), 7.18 (d,  $J = 2.4$  Hz, 1H), 7.16 (ddd,  $J = 7.8, 7.8, 1.2$  Hz, 1H), 6.80 (d,  $J = 8.4$  Hz, 2H), 2.06 (s, 3H);  $^{13}\text{C}\{^1\text{H}\}$  NMR (151 MHz,  $\text{CDCl}_3$ )  $\delta$  191.4, 143.9, 136.82, 136.75, 135.6, 135.4, 132.5, 130.8, 130.1, 130.0, 129.5, 127.2, 124.66, 124.66, 124.1, 123.7, 123.2, 116.7, 111.9, 21.3. HRMS (ESI)  $m/z$ :  $[\text{M}+\text{Na}]^+$  Calcd for  $\text{C}_{22}\text{H}_{17}\text{ClN}_2\text{O}_3\text{SNa}$  447.0546, 449.0517; Found 447.0544, 449.0522.

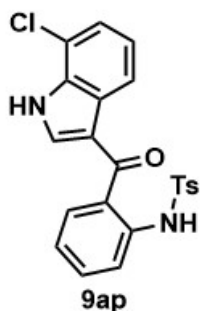

***N*-(2-(7-Chloro-1*H*-indole-3-carbonyl)phenyl)-4-methylbenzenesulfonamide (9ap).** The reaction was performed according to the general procedure used 219 mg (0.5 mmol) of **8ap**. Purification by column chromatography on silica gel using hexane/AcOEt (2/1 v/v) to give **9ap**.

Pale-yellow oil (99.8 mg, 47% yield). IR (KBr)  $\nu$ : 3261, 3060, 2921, 2856, 1614, 1587, 1430, 1386, 1166, 1083, 759, 547  $\text{cm}^{-1}$ .  $^1\text{H}$  NMR (600 MHz,  $\text{CDCl}_3$ )  $\delta$  9.50 (s, 1H), 9.06 (br s, 1H), 8.09 (d,  $J = 8.4$  Hz, 1H), 7.74 (d,  $J = 8.4$  Hz, 1H), 7.54 (d,  $J = 7.8$  Hz, 1H), 7.49 (dd,  $J = 7.8, 7.8$  Hz, 1H), 7.46 (d,  $J = 7.8$  Hz, 2H), 7.34 (d,  $J = 7.2$  Hz, 1H), 7.27–7.24 (m, 2H), 7.18 (dd,  $J = 7.2, 7.2$  Hz, 1H), 6.78 (d,  $J = 7.8$  Hz, 2H), 2.06 (s, 3H);  $^{13}\text{C}\{^1\text{H}\}$  NMR (151 MHz,  $\text{CDCl}_3$ )  $\delta$  191.4, 143.4, 137.1, 135.9, 134.6, 133.5, 132.5, 130.5, 130.2, 129.4, 127.6, 127.4, 124.6, 124.5, 124.0, 123.7, 121.2, 118.1, 117.0, 21.3. HRMS (ESI)  $m/z$ :  $[\text{M}+\text{Na}]^+$  Calcd for  $\text{C}_{22}\text{H}_{17}\text{ClN}_2\text{O}_3\text{SNa}$  447.0546, 449.0517; Found 447.0546, 449.0519.

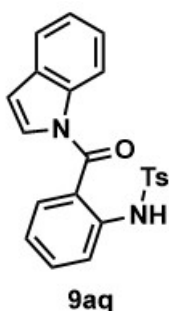

***N*-(2-(1*H*-Indole-1-carbonyl)phenyl)-4-methylbenzenesulfonamide (9aq).** The reaction was performed according to the general procedure used 202 mg (0.5 mmol) of **8aq**. Purification by column chromatography on silica gel using hexane/AcOEt (3/1 v/v) to give **9aq**.

Pale-yellow solid (121 mg, 62% yield). IR (KBr)  $\nu$ : 3278, 3151, 3110, 3064, 3050, 3029, 2973, 2917, 1652, 1600, 1452, 1338, 1162, 767, 559  $\text{cm}^{-1}$ .  $^1\text{H}$  NMR (600 MHz,  $\text{CDCl}_3$ )  $\delta$  8.54 (s, 1H), 8.20 (d,  $J = 8.4$  Hz, 1H), 7.82 (dd,  $J = 8.4, 1.2$  Hz, 1H), 7.58–7.56 (m, 2H), 7.45 (d,  $J = 8.4$  Hz, 2H), 7.38 (ddd,  $J = 7.8, 7.8, 1.2$  Hz, 1H), 7.35–7.32 (m, 2H), 7.24 (ddd,  $J = 7.8, 7.8, 1.2$  Hz, 1H), 6.77 (d,  $J = 7.8$  Hz, 2H), 6.63 (d,  $J = 3.6$  Hz, 1H), 6.46 (d,  $J = 3.0$  Hz, 1H), 2.05 (s, 3H);  $^{13}\text{C}\{^1\text{H}\}$  NMR (151 MHz,  $\text{CDCl}_3$ )  $\delta$  167.4, 144.0, 137.4, 135.74, 135.66, 133.1, 130.7, 130.3, 129.5, 127.4, 127.0, 126.6, 126.0, 125.4, 125.0, 124.6, 121.0, 116.6, 108.9, 21.4. HRMS (ESI)  $m/z$ :  $[\text{M}+\text{Na}]^+$  Calcd for  $\text{C}_{22}\text{H}_{18}\text{N}_2\text{O}_3\text{SNa}$  413.0936; Found 413.0937.

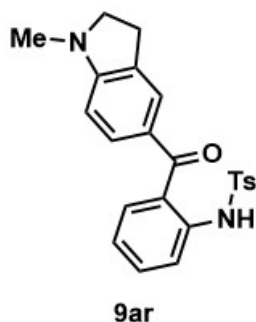

**4-Methyl-N-(2-(1-methylindoline-5-carbonyl)phenyl)benzenesulfonamide (9ar).** The reaction was performed according to the general procedure used 210 mg (0.5 mmol) of **8ar**. Purification by column chromatography on silica gel using hexane/AcOEt (1/1 v/v) to give **9ar**.

Pale-yellow oil (113 mg, 56% yield). IR (KBr)  $\nu$ : 3174, 3056, 2952, 2921, 2836, 1589, 1338, 1162  $\text{cm}^{-1}$ .  $^1\text{H}$  NMR (600 MHz,  $\text{CDCl}_3$ )  $\delta$  9.49 (s, 1H), 7.73 (dd,  $J = 8.4, 1.2$  Hz, 1H), 7.49 (d,  $J = 8.4$  Hz, 2H), 7.44 (ddd,  $J = 7.8, 7.8, 1.2$  Hz, 1H), 7.33 (dd,  $J = 7.8, 1.2$  Hz, 1H), 7.26 (s, 1H), 7.12–7.08 (m, 2H), 6.96 (d,  $J = 7.8$  Hz, 2H), 6.20 (d,  $J = 9.0$  Hz, 1H), 3.55 (t,  $J = 8.4$  Hz, 2H), 3.00 (t,  $J = 8.4$  Hz, 2H), 2.88 (s, 3H), 2.18 (s, 3H);  $^{13}\text{C}\{^1\text{H}\}$  NMR (151 MHz,  $\text{CDCl}_3$ )  $\delta$  195.3, 157.2, 143.3, 137.8, 136.0, 133.8, 132.2, 131.8, 129.6, 129.5, 129.3, 127.3, 126.5, 125.9, 124.1, 123.7, 103.8, 55.0, 34.2, 27.7, 21.5. HRMS (ESI)  $m/z$ :  $[\text{M}+\text{Na}]^+$  Calcd for  $\text{C}_{23}\text{H}_{22}\text{N}_2\text{O}_3\text{SNa}$  429.1249; Found 429.1246.

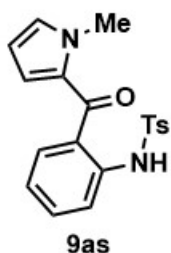

**4-Methyl-N-(2-(1-methyl-1H-pyrrole-2-carbonyl)phenyl)benzenesulfonamide (9as).** The reaction was performed according to the general procedure used 184 mg (0.5 mmol) of **8as**. Purification by column chromatography on silica gel using hexane/AcOEt (2/1 v/v) to give **9as**.

Pale-yellow oil (120 mg, 68% yield). IR (KBr)  $\nu$ : 3216, 3064, 2950, 2925, 1608, 1594, 1488, 1375, 1166, 754, 723, 541  $\text{cm}^{-1}$ .  $^1\text{H}$  NMR (600 MHz,  $\text{CDCl}_3$ )  $\delta$  9.46 (s, 1H), 7.69 (dd,  $J = 8.4, 0.6$  Hz, 1H), 7.53 (dd,  $J = 7.8, 1.8$  Hz, 1H), 7.48 (d,  $J = 8.4$  Hz, 2H), 7.45 (ddd,  $J = 7.8, 7.8, 1.2$  Hz, 1H), 7.11 (ddd,  $J = 7.8, 7.8, 1.2$  Hz, 1H), 6.95 (d,  $J = 8.4$  Hz, 2H), 6.88 (t,  $J = 1.8$  Hz, 1H), 6.18 (dd,  $J = 4.2, 1.8$  Hz, 1H), 6.04 (dd,  $J = 4.2, 2.4$  Hz, 1H), 3.94 (s, 3H), 2.20 (s, 3H);  $^{13}\text{C}\{^1\text{H}\}$  NMR (151 MHz,  $\text{CDCl}_3$ )  $\delta$  186.1, 143.6, 137.5, 135.9, 132.5, 132.3, 131.4, 130.3, 129.6, 129.4, 127.2, 124.2, 124.0, 123.9, 108.3, 37.7, 21.5. HRMS (ESI)  $m/z$ :  $[\text{M}+\text{Na}]^+$  Calcd for  $\text{C}_{19}\text{H}_{18}\text{N}_2\text{O}_3\text{SNa}$  377.0936; Found 377.0939.

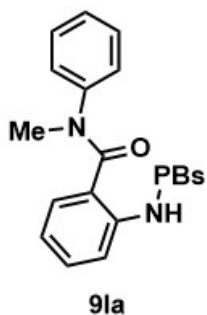

**2-([1,1'-Biphenyl]-4-sulfonamido)-*N*-methyl-*N*-phenylbenzamide (91a).** The reaction was performed according to the general procedure used 228 mg (0.5 mmol) of **81a**. Purification by column chromatography on silica gel using hexane/AcOEt (2/1 v/v) to give **91a**.

Pale-yellow solid (172 mg, 78% yield; mp 173–174 °C). IR (KBr)  $\nu$ : 3176, 3087, 3050, 2969, 2925, 1631, 1592, 1488, 1402, 1371, 1170, 1097, 761, 701, 566  $\text{cm}^{-1}$ .  $^1\text{H}$  NMR (600 MHz,  $\text{CDCl}_3$ )  $\delta$  9.43 (br s, 1H), 7.99 (d,  $J$  = 8.4 Hz, 2H), 7.70–7.68 (m, 3H), 7.50 (d,  $J$  = 6.6 Hz, 2H), 7.43 (dd,  $J$  = 7.8, 7.8 Hz, 2H), 7.39 (dd,  $J$  = 7.2, 7.2 Hz, 1H), 7.19 (dd,  $J$  = 7.8, 7.8 Hz, 1H), 7.03–7.02 (m, 3H), 6.68 (d,  $J$  = 6.6 Hz, 1H), 6.04 (dd,  $J$  = 7.2, 7.2 Hz, 1H), 6.45 (br s, 2H), 3.42 (s, 3H);  $^{13}\text{C}$  { $^1\text{H}$ } NMR (151 MHz,  $\text{CDCl}_3$ )  $\delta$  169.5, 146.2, 144.5, 139.4, 137.5, 131.04, 130.04, 130.1, 129.4, 129.2, 128.7, 128.1, 127.8, 127.4, 126.9, 126.4, 124.9, 123.1, 122.4, 38.6. HRMS (ESI)  $m/z$ :  $[\text{M}+\text{Na}]^+$  Calcd for  $\text{C}_{26}\text{H}_{22}\text{N}_2\text{O}_3\text{SNa}$  465.1249; Found 465.1254.

Scheme S3. Control experiments.

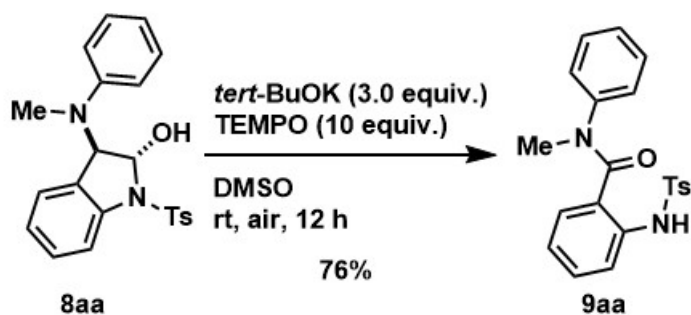

To a solution of **8aa** (1.0 mmol) in DMSO (5 mL, 0.2 M) were added *tert*-BuOK (337 mg, 3.0 mmol, 3.0 equiv.) and TEMPO (1.56 g, 10 mmol, 10 equiv.) under air condition. The mixture was stirred at room temperature until the complete disappearance of starting materials as indicated by TLC. After H<sub>2</sub>O (20 mL) was added to the mixture, the whole was extracted with AcOEt (3 x 20 mL) and washed with brine (5 x 20 mL). The combined organic layer was dried over Na<sub>2</sub>SO<sub>4</sub>, filtered, and concentrated *in vacuo*. The residue was purified by silica gel column chromatography using hexane/AcOEt (2/1 v/v) to give **9aa** (290 mg, 76%).

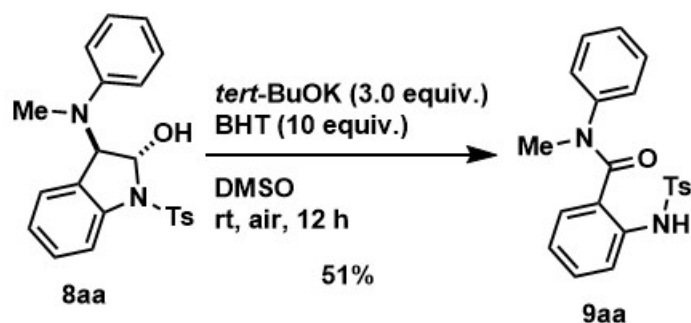

To a solution of **8aa** (1.0 mmol) in DMSO (5 mL, 0.2 M) were added *tert*-BuOK (337 mg, 3.0 mmol, 3.0 equiv.) and BHT (2.20 g, 10 mmol, 10 equiv.) under air condition. The mixture was stirred at room temperature until the complete disappearance of starting materials as indicated by TLC. After H<sub>2</sub>O (20 mL) was added to the mixture, the whole was extracted with AcOEt (3 x 20 mL) and washed with brine (5 x 20 mL). The combined organic layer was dried over Na<sub>2</sub>SO<sub>4</sub>, filtered, and concentrated *in vacuo*. The residue was purified by silica gel column chromatography using hexane/AcOEt (2/1 v/v) to give **9aa** (193 mg, 51%).

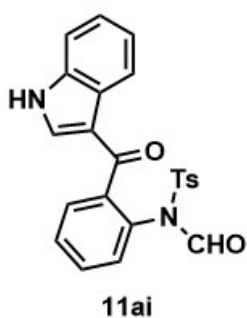

*N*-(2-(1*H*-Indole-3-carbonyl)phenyl)-*N*-tosylformamide (**11ai**).

Pale-yellow solid (12.6 mg, 6% yield). IR (KBr)  $\nu$ : 3342, 3185, 3056, 2923, 2852, 1610, 1436, 1340, 1159, 914, 750, 676, 565  $\text{cm}^{-1}$ .  $^1\text{H}$  NMR (600 MHz,  $\text{DMSO-}d_6$ )  $\delta$  12.40 (s, 1H), 10.63 (s, 1H), 8.22 (d,  $J = 3.0$  Hz, 1H), 8.17 (d,  $J = 7.2$  Hz, 1H), 7.69 (d,  $J = 7.8$  Hz, 1H), 7.64 (d,  $J = 8.4$  Hz, 2H), 7.57–7.54 (m, 2H), 7.37 (d,  $J = 7.8$  Hz, 2H), 7.33–7.25 (m, 3H), 7.11 (d,  $J = 8.4$  Hz, 1H), 2.36 (s, 3H);  $^{13}\text{C}\{^1\text{H}\}$  NMR (151 MHz,  $\text{CDCl}_3$ )  $\delta$  197.6, 187.0, 144.6, 141.7, 136.6, 136.34, 136.34, 135.9, 134.8, 130.1, 127.5, 127.3, 125.3, 124.9, 123.8, 122.7, 122.4, 118.6, 114.3, 112.0, 21.7. HRMS (ESI)  $m/z$ :  $[\text{M}+\text{Na}]^+$  Calcd for  $\text{C}_{23}\text{H}_{18}\text{N}_2\text{O}_4\text{SNa}$  441.0885; Found 441.0885.

**Scheme S4. Follow up chemistry.**

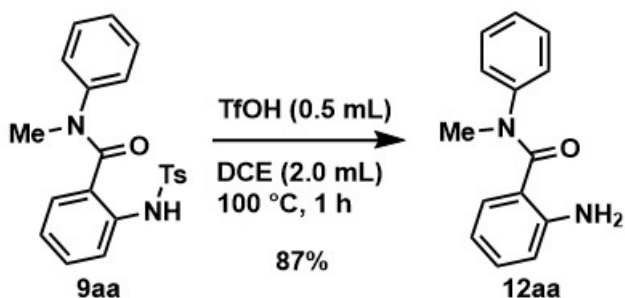

**2-Amino-N-methyl-N-phenylbenzamide (12aa)** <sup>[3c]</sup>. To a solution of **9aa** (38.1 mg, 0.1 mmol) in DCE (1 mL, 0.1 M) was added TfOH (0.5 mL). The mixture was stirred at 100 °C in oil bath for 1 h. After the whole was cooled to room temperature, the resulting mixture was quenched with sat.  $\text{NaHCO}_3$  (5 mL) and extracted with AcOEt (3 x 20 mL). The combined organic layer was washed with brine (20 mL), dried over  $\text{Na}_2\text{SO}_4$ , filtered, and concentrated *in vacuo*. The residue was purified by silica gel column chromatography using hexane/AcOEt (3/1 v/v) to give **12aa**.

Pale-yellow oil (19.7 mg, 87% yield). IR (KBr)  $\nu$ : 3434, 3367, 3062, 3035, 2925, 2854, 1619, 1585, 1492, 1371, 1159, 1027, 752, 700, 586  $\text{cm}^{-1}$ .  $^1\text{H}$  NMR (600 MHz,  $\text{CDCl}_3$ )  $\delta$  7.22 (dd,  $J = 7.8, 7.8$  Hz, 2H), 7.12 (dd,  $J = 7.8, 7.8$  Hz, 1H), 7.06 (d,  $J = 8.4$  Hz, 2H), 6.97 (ddd,  $J = 8.4, 7.2, 1.2$  Hz, 1H), 6.71 (dd,  $J = 7.8, 1.8$  Hz, 1H), 6.61 (dd,  $J = 8.4, 1.2$  Hz, 1H), 6.31 (ddd,  $J = 7.8, 7.8, 0.6$  Hz, 1H), 4.66 (br s, 2H), 3.48 (s, 3H);  $^{13}\text{C}\{^1\text{H}\}$  NMR (151 MHz,  $\text{CDCl}_3$ )  $\delta$  171.2, 147.0, 145.1, 130.6, 129.8, 129.2, 126.5, 126.4, 119.8, 116.7, 116.5, 38.1. HRMS (ESI)  $m/z$ :  $[\text{M}+\text{Na}]^+$  Calcd for  $\text{C}_{14}\text{H}_{14}\text{N}_2\text{OSNa}$  249.1004; Found 249.1004.

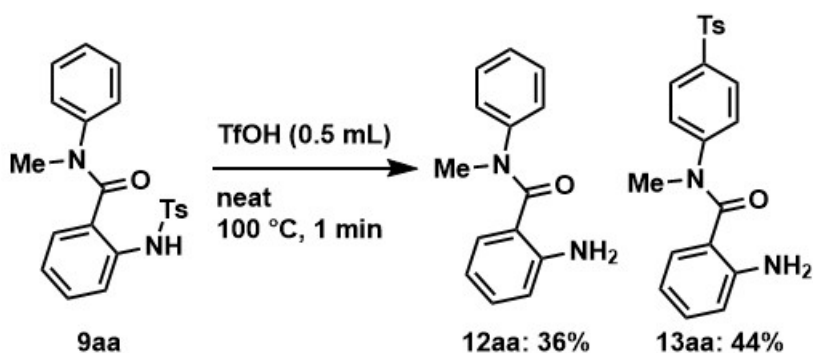

**2-Amino-N-methyl-N-(4-tosylphenyl)benzamide (13aa)** <sup>[3c]</sup>. **9aa** (38.1 mg, 0.1 mmol) was stirred at 100 °C in oil bath under solvent-free condition. Then, TfOH (0.5 mL) was added to **9aa** and the mixture was stirred for



1 minute. After the whole was cooled down to room temperature, the mixture was quenched with sat. NaHCO<sub>3</sub> (5 mL) and extracted with AcOEt (3 x 10 mL). The combined organic layer was washed with brine (10 mL), dried over Na<sub>2</sub>SO<sub>4</sub>, filtered, and concentrated *in vacuo*. The residue was purified by silica gel column chromatography using hexane/AcOEt (1/1 v/v) to give **12aa** (8.2 mg, 36%) and **13aa**.

Pale-yellow solid (16.8 mg, 44% yield; mp 162–164 °C). IR (KBr)  $\nu$ : 3467, 3369, 3089, 3062, 2975, 2923, 2854, 1635, 1616, 1583, 1490, 1355, 1153, 1099, 754, 588 cm<sup>-1</sup>. <sup>1</sup>H NMR (600 MHz, CDCl<sub>3</sub>)  $\delta$  7.77–7.75 (m, 4H), 7.28 (d, *J* = 7.8 Hz, 2H), 7.15 (d, *J* = 8.4 Hz, 2H), 7.01 (ddd, *J* = 7.8, 7.8, 1.2 Hz, 1H), 6.63 (dd, *J* = 7.8, 1.2 Hz, 2H), 6.30 (ddd, *J* = 7.8, 7.8, 0.6 Hz, 1H), 4.69 (br s, 2H), 3.45 (s, 3H), 2.40 (s, 3H); <sup>13</sup>C {<sup>1</sup>H} NMR (151 MHz, CDCl<sub>3</sub>)  $\delta$  171.4, 149.4, 147.3, 144.4, 138.9, 138.5, 131.4, 130.1, 129.7, 128.7, 127.7, 126.5, 118.5, 117.1, 116.8, 37.8, 21.7. HRMS (ESI) *m/z*: [M+Na]<sup>+</sup> Calcd for C<sub>21</sub>H<sub>20</sub>N<sub>2</sub>O<sub>3</sub>SNa 403.1092; Found 403.1097.

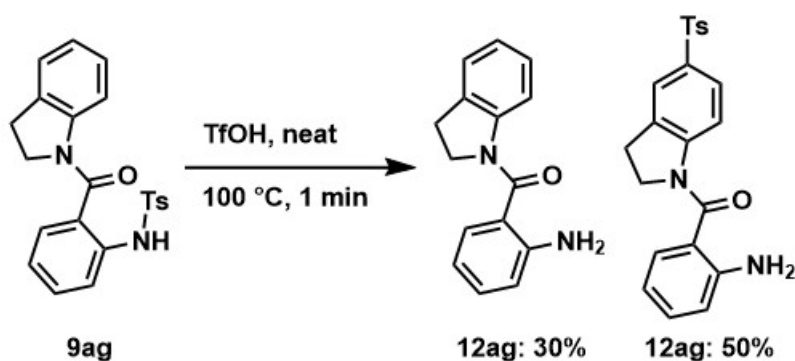

**9ag** (1.18 g, 3.0 mmol) was stirred at 100 °C in oil bath under solvent-free condition. Then, TfOH (1.5 mL) was added to **9ag** and the mixture was stirred for 1 minute. After the whole was cooled down to room temperature, the mixture was quenched with sat. NaHCO<sub>3</sub> (5 mL) and extracted with AcOEt (3 x 10 mL). The combined organic layer was washed with brine (10 mL), dried over Na<sub>2</sub>SO<sub>4</sub>, filtered, and concentrated *in vacuo*. The residue was purified by silica gel column chromatography using hexane/AcOEt (2/1 v/v) [3c].

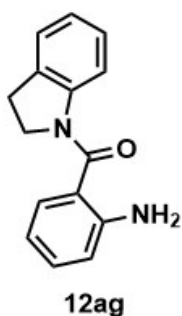

**(2-(2-(2-(2-(2-((1H-indol-1-ylidene)amino)ethyl)amino)ethyl)amino)ethyl)amino)benzamide (**12ag**).**

Pale-yellow solid (211 mg, 30% yield; 138–139 °C). IR (KBr)  $\nu$ : 3469, 3372, 3031, 2954, 2894, 2859, 1635, 1579, 1479, 1400, 763 cm<sup>-1</sup>. <sup>1</sup>H NMR (600 MHz, CDCl<sub>3</sub>)  $\delta$  7.56 (br s, 1H), 7.25–7.20 (m, 3H), 7.13 (dd, *J* = 7.8, 7.8 Hz, 1H), 7.02 (dd, *J* = 7.2, 7.2 Hz, 1H), 6.77 (d, *J* = 7.8 Hz, 1H), 6.73 (dd, *J* = 7.2, 7.2 Hz, 1H), 4.11 (t, *J* = 7.8 Hz, 2H), 3.51 (br s, 2H), 3.11 (t, *J* = 7.2 Hz, 2H); <sup>13</sup>C {<sup>1</sup>H} NMR (151 MHz, CDCl<sub>3</sub>)  $\delta$  169.0, 145.8, 142.7, 132.8, 131.5, 128.4, 127.4, 125.1, 124.1, 122.8, 120.6, 117.7, 117.2, 50.7, 28.3. HRMS (ESI) *m/z*:

[M+Na]<sup>+</sup> Calcd for C<sub>15</sub>H<sub>14</sub>N<sub>2</sub>O<sub>3</sub>Na 261.1004; Found 261.1008.

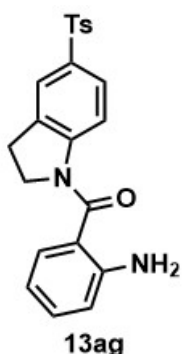

**(2-Aminophenyl)(5-tosylindolin-1-yl)methanone (13ag).**

Brown oil (590 mg, 50% yield). IR (KBr)  $\nu$ : 3467, 3367, 3062, 3025, 2958, 2921, 2854, 1619, 1585, 1479, 1375, 1145, 1087, 754, 661, 584 cm<sup>-1</sup>. <sup>1</sup>H NMR (600 MHz, CDCl<sub>3</sub>)  $\delta$  7.75 (d,  $J$  = 7.8 Hz, 2H), 7.68 (s, 1H), 7.66 (d,  $J$  = 9.0 Hz, 1H), 7.63 (d,  $J$  = 8.4 Hz, 1H), 7.23 (d,  $J$  = 7.8 Hz, 2H), 7.144 (dd,  $J$  = 7.8, 7.8 Hz, 1H), 7.138 (d,  $J$  = 7.2 Hz, 1H), 6.69 (d,  $J$  = 7.8 Hz, 1H), 6.64 (dd,  $J$  = 7.8, 7.8 Hz, 1H), 4.56 (br s, 2H), 4.05 (t,  $J$  = 8.4 Hz, 2H), 3.04 (t,  $J$  = 8.4 Hz, 2H), 2.33 (s, 3H); <sup>13</sup>C {<sup>1</sup>H} NMR (151 MHz, CDCl<sub>3</sub>)  $\delta$  169.6, 146.9, 146.2, 143.8, 138.9, 136.2, 134.0, 131.8, 129.8, 128.0, 127.6, 127.2, 124.0, 118.8, 117.1, 116.9, 116.8, 50.8, 27.5, 21.4. HRMS (ESI)  $m/z$ : [M+Na]<sup>+</sup> Calcd for C<sub>22</sub>H<sub>20</sub>N<sub>2</sub>O<sub>3</sub>SNa 415.1092; Found 415.1094.

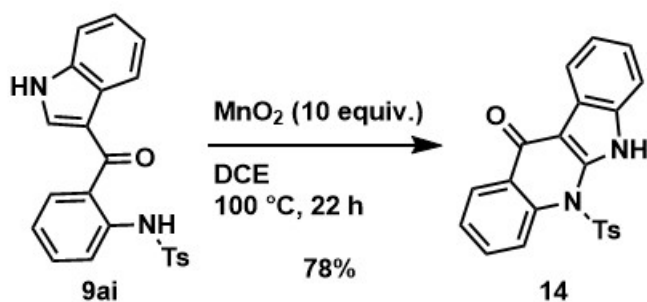

**5-Tosyl-5,6-dihydro-11H-indolo[2,3-*b*]quinolin-11-one (14)** <sup>[4]</sup>. To a solution of **9ai** (195 mg, 0.5 mmol) in DCE (5 mL, 0.1 M) was added MnO<sub>2</sub> (435 mg, 10 equiv., 5 mmol). The mixture was stirred at 100 °C in oil bath for 22 h. After the whole was cooled to room temperature, the mixture was filtered with celite pad and concentrated *in vacuo*. The residue was purified by silica gel column chromatography using hexane/AcOEt (2/1 v/v) to give **14**.

Pale-yellow solid (152 mg, 78% yield; 178–180 °C). IR (KBr)  $\nu$ : 3156, 3089, 2884, 1623, 1596, 1498, 1382, 1172, 779, 667 cm<sup>-1</sup>. <sup>1</sup>H NMR (600 MHz, CDCl<sub>3</sub>)  $\delta$  10.05 (br s, 1H), 8.49 (d,  $J$  = 8.4 Hz, 1H), 8.379 (d,  $J$  = 7.8 Hz, 1H), 8.376 (d,  $J$  = 7.8 Hz, 1H), 7.65 (ddd,  $J$  = 9.0, 7.2, 1.8 Hz, 1H), 7.55 (d,  $J$  = 7.8 Hz, 1H), 7.48 (dd,  $J$  = 7.8, 7.8 Hz, 1H), 7.39 (dd,  $J$  = 7.2, 7.2 Hz, 1H), 7.35 (dd,  $J$  = 7.8, 7.8 Hz, 1H), 7.23 (d,  $J$  = 8.4 Hz, 2H), 7.00 (d,  $J$  = 7.8 Hz, 2H), 2.24 (s, 3H); <sup>13</sup>C {<sup>1</sup>H} NMR (151 MHz, CDCl<sub>3</sub>)  $\delta$  175.0, 146.5, 141.6, 136.9, 133.6, 132.1, 131.6, 130.1, 128.0, 126.95, 126.85, 126.6, 124.7, 123.0, 122.7, 122.1, 121.9, 111.3, 107.0, 21.7. HRMS (ESI)  $m/z$ : [M+Na]<sup>+</sup> Calcd for C<sub>22</sub>H<sub>16</sub>N<sub>2</sub>O<sub>3</sub>SNa 411.0779; Found 411.0779.

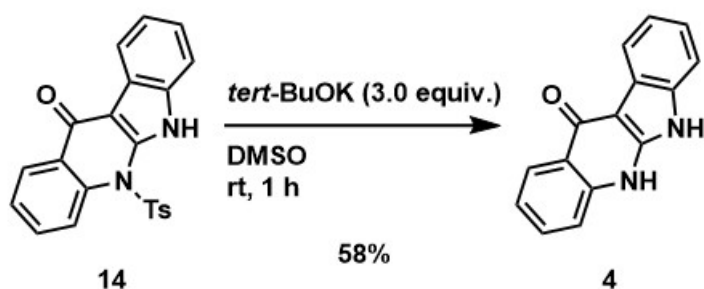

**5*H*,6*H*-Quinindolin-11-one (4)** <sup>[1a, 6]</sup>. To a solution of **14** (116.5 mg, 0.3 mmol) in DMSO (1.5 mL, 0.2 M) was added *t*BuOK (101 mg, 3.0 equiv., 0.9 mmol). The mixture was stirred at room temperature for 1 h. After the mixture was quenched with H<sub>2</sub>O (10 mL), the whole was extracted with AcOEt (3 x 10 mL) and washed with brine (10 mL). The combined organic layer was dried over Na<sub>2</sub>SO<sub>4</sub>, filtered, and concentrated *in vacuo*. The residue was purified by silica gel column chromatography using CHCl<sub>3</sub>/MeOH (6/1 v/v) to give **4**.

Pale-yellow solid (41 mg, 58% yield; mp > 300 °C). IR (KBr)  $\nu$ : 3274, 3095, 3048, 2965, 1617, 1411, 1197, 740 cm<sup>-1</sup>. <sup>1</sup>H NMR (600 MHz, DMSO-*d*<sub>6</sub>)  $\delta$  12.16 (br s, 1H), 11.53 (br s, 1H), 8.29 (d, *J* = 7.8 Hz, 1H), 8.18 (d, *J* = 7.2 Hz, 1H), 7.64–7.63 (m, 2H), 7.47 (d, *J* = 7.8 Hz, 1H), 7.31–7.29 (m, 1H), 7.24 (dd, *J* = 7.8, 7.8 Hz, 1H), 7.19 (dd, *J* = 7.2, 7.2 Hz, 1H); <sup>13</sup>C {<sup>1</sup>H} NMR (151 MHz, DMSO-*d*<sub>6</sub>)  $\delta$  172.3, 145.3, 138.3, 135.0, 130.8, 125.3, 123.8, 123.6, 122.7, 121.5, 120.9, 120.0, 117.5, 110.9, 101.8. HRMS (ESI) *m/z*: [M+Na]<sup>+</sup> Calcd for C<sub>15</sub>H<sub>10</sub>N<sub>2</sub>ONa 257.0691; Found 257.0694.

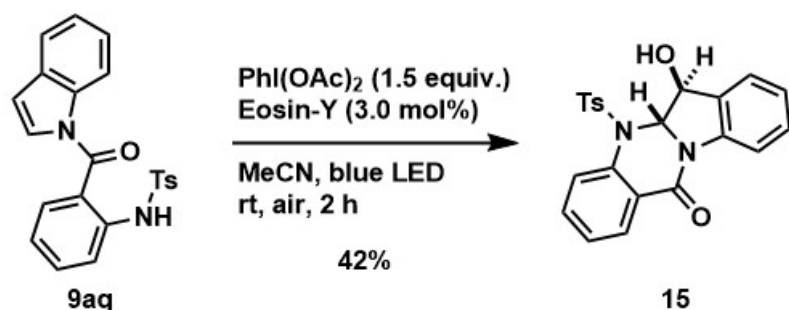

**trans-6-Hydroxy-5-tosyl-5a,6-dihydroindolo[2,1-*b*]quinazolin-12(5*H*)-one (15)** <sup>[7]</sup>. **9aq** (39.0 mg, 0.1 mmol), iodobenzene diacetate (48.3 mg, 1.5 equiv., 0.15 mmol) and eosin-Y (2.1 mg, 3.0 mol%) in MeCN (2 mL) was stirred at room temperature under the irradiation of 8 W blue LED (448 nm) for 2 h. After H<sub>2</sub>O (5 mL) was added to the mixture, the whole was extracted with AcOEt (3 x 10 mL). The combined organic layer was washed with brine (10 mL), dried over Na<sub>2</sub>SO<sub>4</sub>, filtered, and concentrated *in vacuo*. The residue was purified by silica gel column chromatography using hexane/AcOEt (3/1 v/v) to give **8la**.

Pale-yellow solid (16.9 mg, 42% yield). IR (KBr)  $\nu$ : 3361, 3064, 3048, 3029, 2960, 2927, 1644, 1484, 1427, 1359, 1168, 763, 674 cm<sup>-1</sup>. <sup>1</sup>H NMR (600 MHz, CDCl<sub>3</sub>)  $\delta$  7.98 (d, *J* = 7.8 Hz, 1H), 7.82 (d, *J* = 7.8 Hz, 1H), 7.69 (d, *J* = 7.8 Hz, 1H), 7.67 (dd, *J* = 8.4, 8.4 Hz, 1H), 7.51 (d, *J* = 8.4 Hz, 1H), 7.50 (d, *J* = 7.6 Hz, 1H), 7.29 (dd, *J* = 7.8, 7.8 Hz, 1H), 7.19 (dd, *J* = 7.2, 7.2 Hz, 1H), 6.86–6.83 (m, 5H), 5.50 (d, *J* = 4.8 Hz, 1H), 2.78 (br s, 1H), 2.25 (s, 3H); <sup>13</sup>C {<sup>1</sup>H} NMR (151 MHz, CDCl<sub>3</sub>)  $\delta$  159.2, 145.0, 140.5, 140.4, 134.2, 133.1, 130.3, 130.1,

129.5, 128.4, 128.2, 127.3, 127.0, 125.6, 125.2, 115.3, 84.4, 71.8, 21.6. HRMS (ESI)  $m/z$ :  $[M+Na]^+$  Calcd for  $C_{22}H_{18}N_2O_4SNa$  429.0885; Found 429.0887.

## Reference

- 1 (a) Heredia, M. D.; Guerra, W. D.; Barolo, S. M.; Fornasier, S. J.; Rossi, R. A.; Budén, M. E. *J. Org. Chem.* **2020**, *85*, 13481–13494. (b) Tokushige, K.; Abe, T. *J. Org. Chem.* **2024**, *89*, 10349–10354.
- 2 (a) Hodson, H. F.; Madge, D. J.; Slawin, A. N. Z.; Widdowson, D. A.; Williams, D. J. *Tetrahedron* **1994**, *50*, 1899–1906; (b) Arisawa, M.; Terada, Y.; Takahashi, K.; Nakagawa, M.; Nishida, A. *J. Org. Chem.* **2006**, *71*, 4255–4261; (c) Jayaraman, A.; Castro, L. C. M.; Fontaine, F.-G. *Org. Process Res. Dev.* **2018**, *22*, 1489–1499; (d) Sayyad, M.; Nanaji, Y.; Ghorai, M. K. *J. Org. Chem.* **2015**, *80*, 12659–12667; (e) Ramalingan, C.; Lee, I.-S.; Kwak, Y.-W. *Chem. Pharm. Bull.* **2009**, *57*, 591–596. ;(f) Keith, J. M. *J. Org. Chem.* **2010**, *75*, 2722–2725.
- 3 (a) Abe, T.; Suzuki, T.; Anada, M.; Matsunaga, S.; Yamada, K. *Org. Lett.* **2017**, *19*, 4275–4278; (b) Abe, T.; Hirao, S.; Yamashiro, T. *Chem. Commun.* **2020**, *56*, 10183–10186; (c) Abe, T.; Yamashiro, T.; Shimizu, K.; Sawada, D. *Chem. Eur. J.* **2022**, *28*, e202201113; (d) Abe, T.; Yamada, K. *Org. Lett.* **2018**, *20*, 1469–1472; (e) Yamada, K.; Mishima, N.; Saito, K.; Nishi, T. *Tetrahedron* **2021**, *97*, 132404.
- 4 Tokushige, K.; Abe, T. *Chem. Eur. J.* **2024**, *30*, e202302963.
- 5 Luca, O. R.; Wang, T.; Konezny, S. J.; Batista, V. S.; Crabtree, R. H. *New J. Chem.* **2011**, *35*, 998–999.
- 6 (a) Subbaraju, G. V.; Kavitha, J.; Rajasekhar, D.; Jimenez, J. I. *J. Nat. Prod.* **2004**, *67*, 461–462. (b) Wilkie, R. P.; Neal, A. R.; Johnson, C. A.; Voute, N.; Lancefield, C. S.; Stell, M. D.; Medda, F.; Makiyi, E. F.; Turner, E. M.; Ojo, O. S.; Slawin, A. M. Z.; Lebl, T.; Mullen, P.; Harrison, D. J.; Ireland, C. M.; Westwood, N. J. *Chem. Commun.* **2016**, *52*, 10747–10750.
- 7 Paul, A.; Sengupta, A.; Yadav, S. *J. Org. Chem.* **2023**, *88*, 9599–9614.

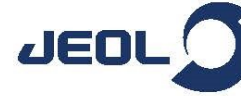

---- PROCESSING PARAMETERS ----  
sexp( 0.2[Hz], 0.0[s] )  
trapezoid( 0[Hz], 0[Hz], 80[Hz], 100[Hz] )  
zerofill( 1, TRUE )  
fft( 1, TRUE, TRUE )  
machinphase  
ppm  
reference( 7.24828[ppm], 7.26[ppm] )  
thresh( 2.33241[Hz], 1, )

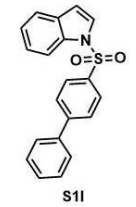

Filename = TW-6-052-1\_proton-1-2.jdf  
Author = delta  
Experiment = proton.jxp  
Sample\_id = TW-6-052-1  
Solvent = CHLOROFORM-D  
Actual\_Start\_Time = 22-MAR-2024 20:40:16  
Version\_Time = 23-MAR-2024 01:57:58  
Comment = single pulse  
Data\_Format = 1D COMPLEX  
Dim\_Size = 26214  
X\_Domain = Proton  
Dim\_Title = Proton  
Dim\_Units = [ppm]  
Dimensions = X  
Spectrometer = JNM-ECZ600R/S3  
Field\_Strength = 14.09636928(T) (600[MHz])  
X\_Acq\_Duration = 2.18103808[s]  
X\_Domain = Proton  
X\_Freq = 600.1723046[MHz]  
X\_Offset = 5[ppm]  
X\_Points = 32768  
X\_Prescans = 1  
X\_Resolution = 0.45849272[Hz]  
X\_Sweep = 15.02403846[kHz]  
X\_Sweep\_Clippped = 12.01823077[kHz]  
Irr\_Domain = Proton  
Irr\_Freq = 600.1723046[MHz]  
Irr\_Offset = 5[ppm]  
Tri\_Domain = Proton  
Tri\_Freq = 600.1723046[MHz]  
Tri\_Offset = 5[ppm]  
Blanking = 5.0[us]  
Clipped = FALSE  
Scans = 4  
Total\_Scans = 4  
Relaxation\_Delay = 1.5[s]  
Recvr\_Gain = 56  
Temp\_Set = 20.3[AC]  
X\_90\_Width = 9.9[us]  
X\_Acq\_Time = 2.18103808[s]  
X\_Angle = 45[deg]  
X\_Atn = 8.1[dB]  
X\_Pulse = 4.95[us]  
Irr\_Mode = Off  
Tri\_Mode = Off  
Dante\_Loop = 150  
Dante\_Preset = FALSE  
Decimation\_Rate = 0  
Initial\_Wait = 1[s]  
Phase = (0, 90, 270, 180, 180, 270, 90, 0)  
Preset\_Time = 1.5[s]  
Preset\_Time\_Play = FALSE  
Relaxation\_Delay\_Calc = 0[s]  
Relaxation\_Delay\_Temp = 1.5[s]  
Repetition\_Time = 3.68103808[s]

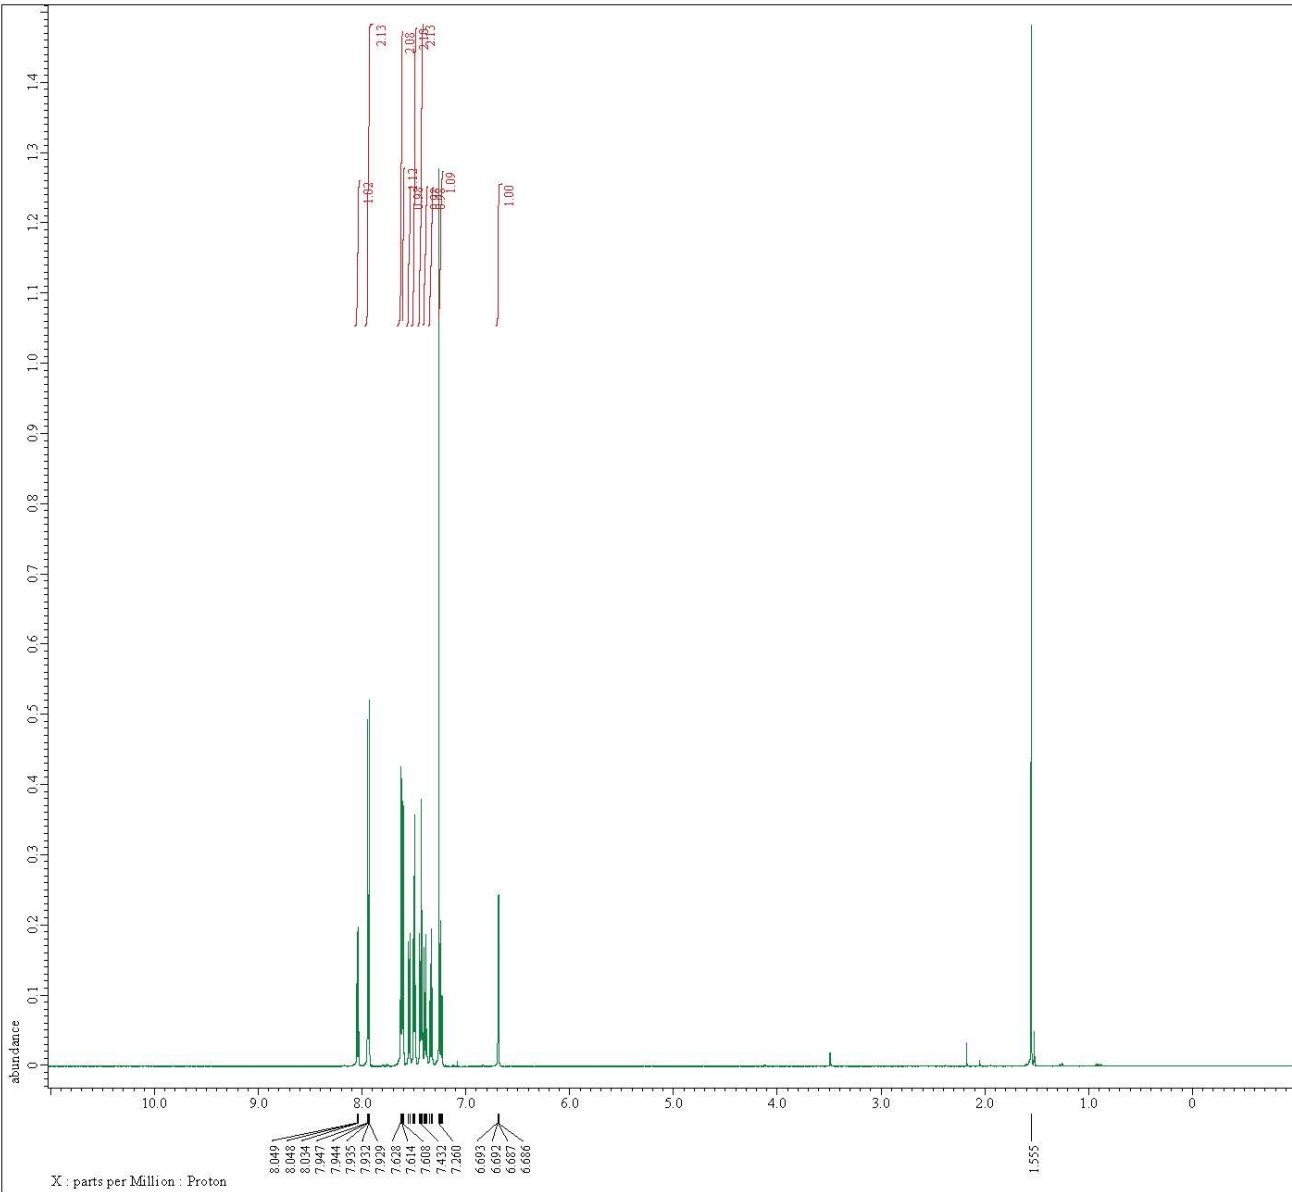

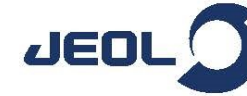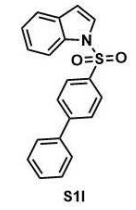

---- PROCESSING PARAMETERS ----  
blp.c16(16, 64, 1)  
sepf( 2.0[Hz], 0.0[s] )  
fft( 1, TRUE, TRUE )  
machinephase  
ppm

Filename = TK-6-052-1\_carbon-1-3.jdf  
Author = delta  
Experiment = carbon\_jsp  
Sample\_Id = TK-6-052-1  
Solvent = CHLOROFORM-D  
Actual\_Start\_Time = 22-MAR-2024 20:41:13  
Revision\_Time = 2-JUL-2024 19:39:41

Comment = single pulse decoupled gated NOE  
Data\_Format = 1D\_COMPLX  
Dir\_Size = 25214  
X\_Domain = Carbon13  
Dir\_Title = Carbon13  
Dir\_Units = [ppm]  
Dimensions = X  
Spectrometer = JNM-ECZ600R/S3

Field\_Strength = 14.09636928[T] (600 [MHz])  
X\_Acq\_Duration = 0.69206016[s]  
X\_Domain = Carbon13  
X\_Freq = 150.91343039[MHz]  
X\_Offset = 100[ppm]  
X\_Points = 32768  
X\_Prescans = 4  
X\_Resolution = 1.44496109[Hz]  
X\_Sweep = 47.34848485[kHz]  
X\_Sweep\_Clipped = 37.87878788[kHz]  
Irr\_Domain = proton  
Irr\_Freq = 600.1723046[MHz]  
Irr\_Offset = 5[ppm]  
Blanking = 15.0[us]  
Clipped = FALSE  
Scans = 256  
Total\_Scans = 256

Relaxation\_Delay = 2[s]  
Recvr\_Gain = 56  
Temp\_Det = 20.3[dC]  
X\_90\_Width = 8.1[us]  
X\_Acq\_Time = 0.69206016[s]  
X\_Angle = 30[deg]  
X\_Am = 11[dB]  
X\_Pulse = 2.7[us]  
Irr\_Am\_Dec = 25.803[dB]  
Irr\_Am\_Dec\_Calc = 25.803[dB]  
Irr\_Am\_Dec\_Default\_Calc = 25.803[dB]  
Irr\_Am\_Noise = 25.803[dB]  
Irr\_Dec\_Bandwidth\_Hz = 7.22684211[kHz]  
Irr\_Dec\_Bandwidth\_Ppm = 12.05794078[ppm]  
Irr\_Dec\_Freq = 600.1723046[MHz]  
Irr\_Dec\_Magic\_Factor = 2.4  
Irr\_Decoupling = TRUE  
Irr\_Noise = TRUE  
Irr\_Noise = SALTZ  
Irr\_Offset\_Default = 5[ppm]  
Irr\_Peakch = 76[us]  
Irr\_Peakch\_Default = 76[us]  
Irr\_Peakch\_Default\_Calc = 76[us]  
Irr\_Peakch\_Templ = 76[us]  
Irr\_Wurst = FALSE  
Decimation\_Rate = 0  
Initial\_Wait = 1[s]  
Noe\_Time = 2[s]  
Noe\_Time\_Flag = FALSE  
Relaxation\_Delay\_Calc = 0[s]  
Relaxation\_Delay\_Temp = 2[s]  
Repetition\_Time = 2.69206016[s]

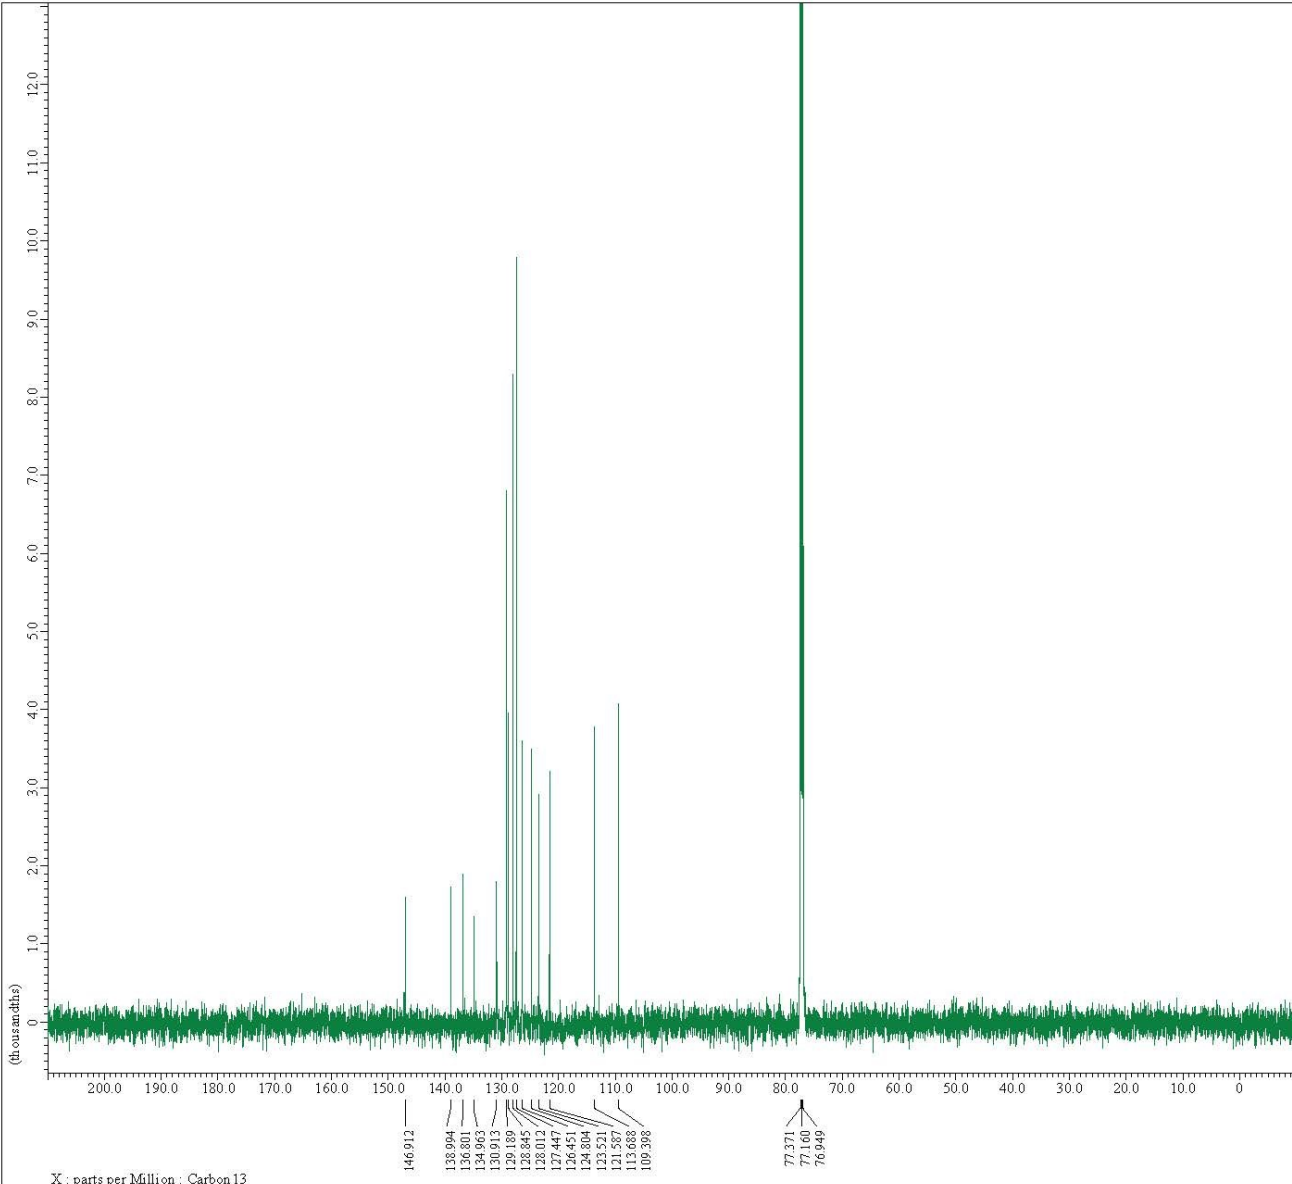

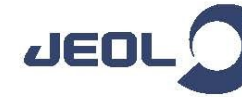

---- PROCESSING PARAMETERS ----  
sexp( 0.2[Hz], 0.0[s] )  
trapezoid( 0[Hz], 0[Hz], 80[Hz], 100[Hz] )  
zerofill( 1, TRUE )  
fft( 1, TRUE, TRUE )  
machinephase  
ppm  
reference( 7.24764[ppm], 7.26[ppm] )  
thresh( 2.67219[Hz], 1, )

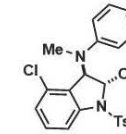

**trans-8ha**  
(trans:cis = 95:5)

Filename = KY-1-026-1-2\_proton-1-3.jdf  
Author = delta  
Experiment = proton.jsp  
Sample Id = KY-1-026-1-2  
Solvent = CHLOROFORM-D  
Actual\_Start\_Time = 26-JUN-2024 22:10:30  
Revision\_Time = 5-AUG-2024 11:15:01  
Data Format = 1D COMPLEX  
Dim Size = 26214  
X\_Domain = Proton  
Dim Title = Proton  
Dim Units = [ppm]  
Dimensions = X  
Spectrometer = JNM-EZ600R/S3  
Field Strength = 14.09636928[T] (600[MHz])  
X\_AcqDuration = 2.91110912[s]  
X\_Domain = Proton  
X\_Freq = 600.1723046[MHz]  
X\_Offset = 5[ppm]  
X\_Points = 32768  
X\_Prescans = 1  
X\_Resolution = 0.34351169[Hz]  
X\_Sweep = 11.2561909[kHz]  
X\_Sweep\_Clippped = 9.00495272[kHz]  
Ifr\_Domain = Proton  
Ifr\_Freq = 600.1723046[MHz]  
Ifr\_Offset = 5[ppm]  
Ifr\_Domain = Proton  
Tri\_Freq = 600.1723046[MHz]  
Tri\_Offset = 5[ppm]  
Blanking = 5.0[us]  
Clipped = FALSE  
Scans = 4  
Total\_Scans = 4  
Relaxation\_Delay = 2[s]  
Recvr Gain = 46  
Temp\_Dec = 21.1[degC]  
X\_90Pulse = 9.9[us]  
X\_Acq Time = 2.91110912[s]  
X\_Angle = 45[deg]  
X\_Atrn = 8.1[dB]  
X\_Pulse = 4.95[us]  
Ifr\_Mode = Off  
Tri\_Mode = Off  
Dante\_Loop = 200  
Dante\_Preset = FALSE  
Decimation\_Rate = 0  
Initial\_Wait = 1[s]  
Phase = (0, 90, 270, 180, 180, 270, 90, 0)  
Preset\_Time = 2[s]  
Preset\_Time\_Play = FALSE  
Relaxation\_Delay\_Calc = 0[s]  
Relaxation\_Delay\_Temp = 2[s]  
Repetition\_Time = 4.91110912[s]

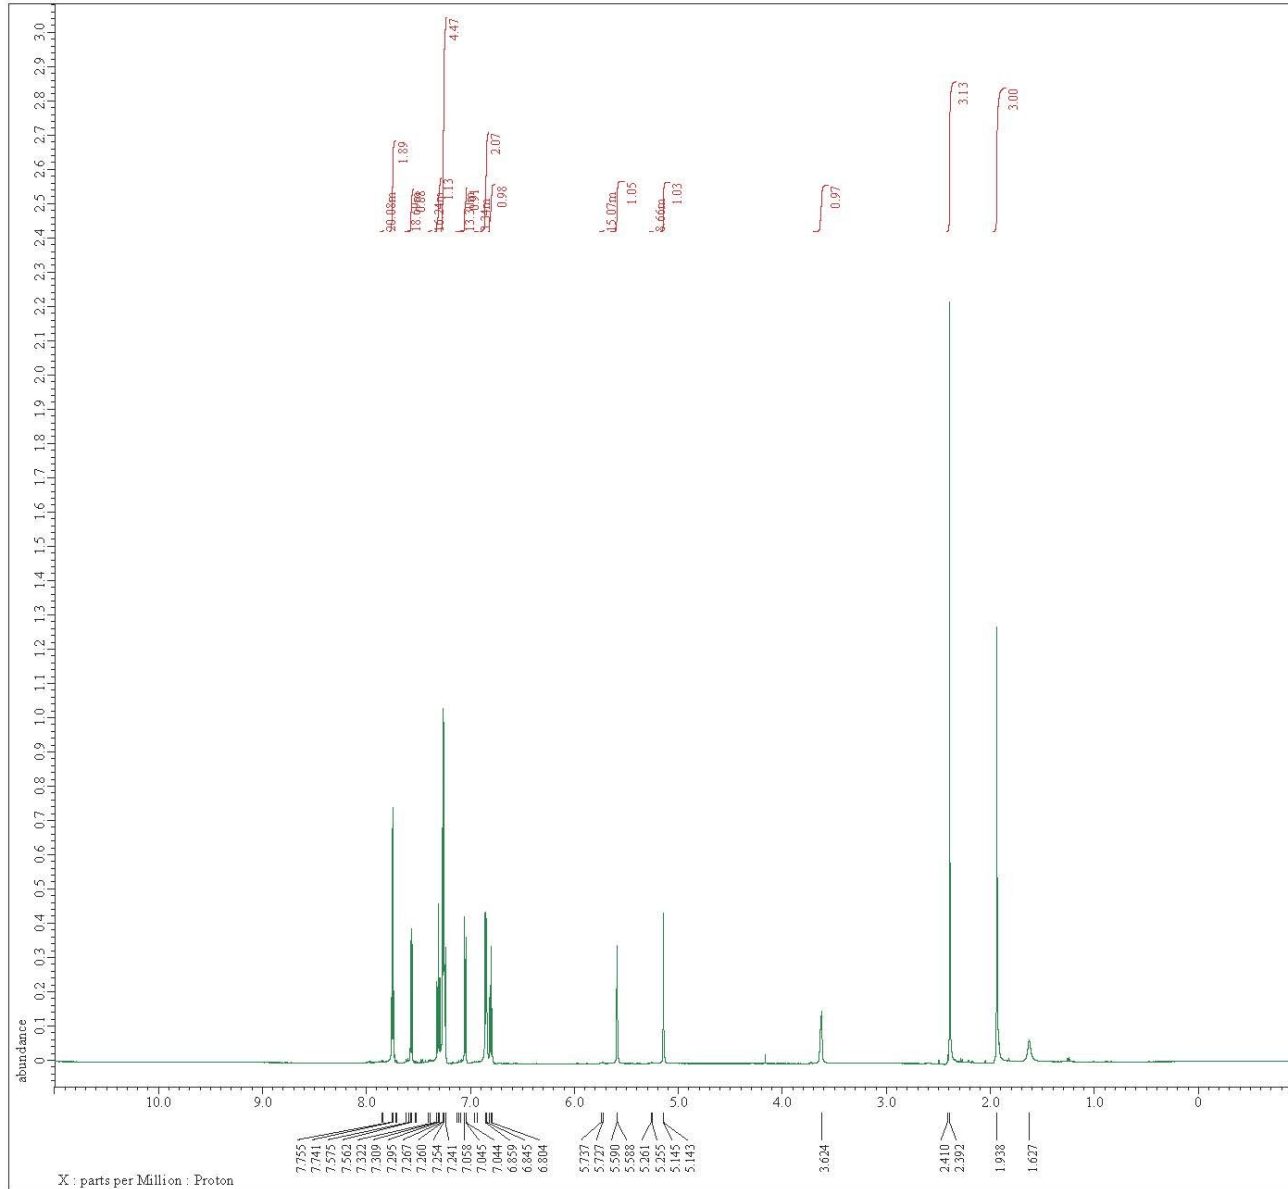



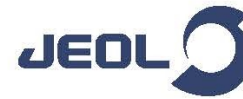

---- PROCESSING PARAMETERS ----  
blip\_cld( 16, 64, 1 )  
sexp( 2.0fHz, 0.0f )  
fft( 1, TRUE, TRUE )  
machinephase  
ppm

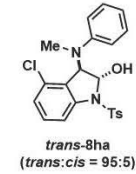

Filename = KY-1-026-1\_carbon-1-2.jdf  
Author = delta  
Experiment = carbon.jxp  
Sample Id = KY-1-026-1  
Solvent = CHLOROFORM-D  
Actual\_Start\_Time = 25-JUN-2024 22:12:49  
Revision\_Time = 25-JUN-2024 22:11:02

Data Format = 1D COMPLEX  
Dia\_Size = 26214  
X\_Domain = Carbon13  
Dia\_Title = Carbon13  
Dia\_Units = [ppm]  
Dimensions = X  
Spectrometer = JNM-ECZ600R/S3

Field\_Strength = 14.09636928[T] (600[MHz])  
X\_Acq\_Duration = 0.63206016[s]  
X\_Domain = Carbon13  
X\_Freq = 150.91343039[MHz]  
X\_Offset = 100[ppm]  
X\_Points = 32768  
X\_Prescans = 1  
X\_Resolution = 1.44496109[Hz]  
X\_Sweep = 47.3484848[kHz]  
X\_Sweep\_Clipped = 37.8787878[kHz]  
Irr\_Domain = Proton  
Irr\_Freq = 600.1723046[MHz]  
Irr\_Offset = 5[ppm]  
Blanking = 15.0[us]  
Clipped = FALSE  
Scans = 32  
Total\_Scans = 32

Relaxation\_Delay = 1[s]  
Recv\_Gain = 56  
Temp\_Gct = 20.8[dC]  
X\_90\_Width = 8.1[us]  
X\_Acq\_Time = 0.63206016[s]  
X\_Angle = 30[deg]  
X\_Atn = 11[dB]  
X\_Pulse = 2.7[us]  
Irr\_Atn\_Dec = 25.803[dB]  
Irr\_Atn\_Dec\_Calc = 25.803[dB]  
Irr\_Atn\_Dec\_Default\_Calc = 25.803[dB]  
Irr\_Dec\_Bandwidth\_Hz = 7.23664211[kHz]  
Irr\_Dec\_Bandwidth\_Ppm = 12.05794078[ppm]  
Irr\_Dec\_Freq = 600.1723046[MHz]  
Irr\_Dec\_Merit\_Factor = 2.2  
Irr\_Decoupling = TRUE  
Irr\_Noise = FALSE  
Irr\_Offset\_Default = 5[ppm]  
Irr\_Pwidth = 76[us]  
Irr\_Pwidth\_Default = 76[us]  
Irr\_Pwidth\_Default\_Calc = 76[us]  
Irr\_Pwidth\_Templ = 76[us]  
Irr\_Wurst = FALSE  
Decimation\_Rate = 0  
Initial\_Wait = 1[s]  
Noe\_Time = 1[s]  
Noe\_Time\_Flag = FALSE  
Relaxation\_Delay\_Calc = 0[s]  
Relaxation\_Delay\_Temp = 1[s]  
Repetition\_Time = 1.63206016[s]

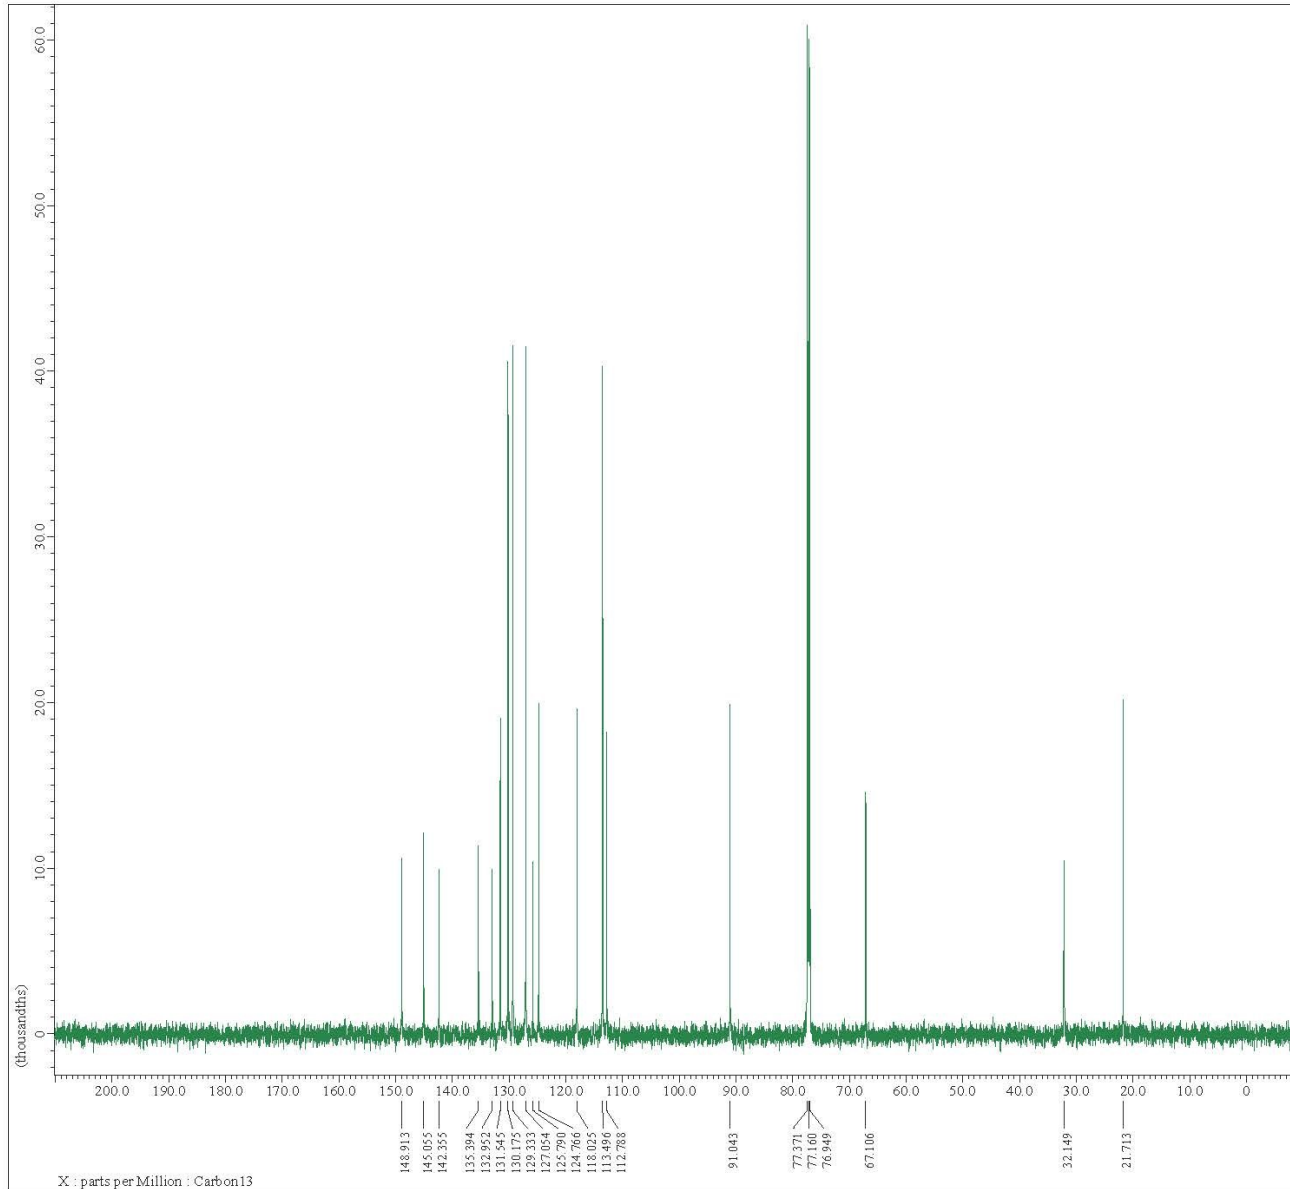

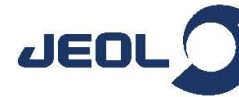

---- PROCESSING PARAMETERS ----  
sexp( 0.2[Hz], 0.0[s] )  
trapezoid( 0[Hz], 0[s], 80[Hz], 100[Hz] )  
zerofill( 1, TRUE )  
fft( 1, TRUE, TRUE )  
machinephase  
f2  
base correct( Akima, 5, 0, FALSE, 3, None, FALSE )

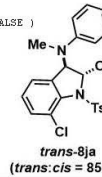

Filename = TK-6-151-0-2\_proton-1-3.jdz  
Author = delta  
Experiment = proton\_3xp  
Sample\_id = TK-6-151-0-2  
Solvent = CHLOROFORM-D  
Actual\_Start\_Time = 26-JUN-2024 22:23:46  
Revision\_Time = 27-JUN-2024 08:16:55  
Data Format = 1D REAL  
Dim Size = 26214  
X\_Domain = Proton  
Dim Title = Proton  
Dim Units = (ppm)  
Dimensions = X  
Spectrometer = JNM-ECZ600R/53  
Field Strength = 14.0963628[T] (600[MHz])  
X\_Acq\_Duration = 2.91110912[s]  
X\_Domain = Proton  
X\_Freq = 600.1723046[MHz]  
X\_Offset = 5[ppm]  
X Points = 32768  
X\_Prescans = 1  
X\_Resolution = 0.34351169[Hz]  
X\_Sweep = 11.2561909[MHz]  
X\_Sweep\_Clippped = 9.00495272[MHz]  
Ifc\_Domain = Proton  
Ifc\_Freq = 600.1723046[MHz]  
Ifc\_Offset = 5[ppm]  
Tri\_Domain = Proton  
Tri\_Freq = 600.1723046[MHz]  
Tri\_Offset = 5[ppm]  
Blanking = 5.0[us]  
Clipped = FALSE  
Scans = 4  
Total\_Scans = 4  
Relaxation\_Delay = 2[s]  
Recvr\_Gain = 36  
Temp\_Cet = 20.9[degC]  
X\_90\_Width = 9.9[us]  
X\_Acq\_Time = 2.91110912[s]  
X\_Angle = 45[deg]  
X\_Alfa = 6.1[deg]  
X\_Pulse = 4.95[us]  
Ifc\_Mode = Off  
Tri\_Mode = Off  
Dante\_Loop = 200  
Dante\_Preset = FALSE  
Decimation\_Rate = 0  
Initial\_Wait = 1[s]  
Phase = (0, 90, 270, 180, 180, 270, 90, 0)  
Preset\_Time = 2[s]  
Preset\_Time\_Flag = FALSE  
Relaxation\_Delay\_Calc = 0[s]  
Relaxation\_Delay\_Temp = 2[s]  
Repetition\_Time = 4.91110912[s]

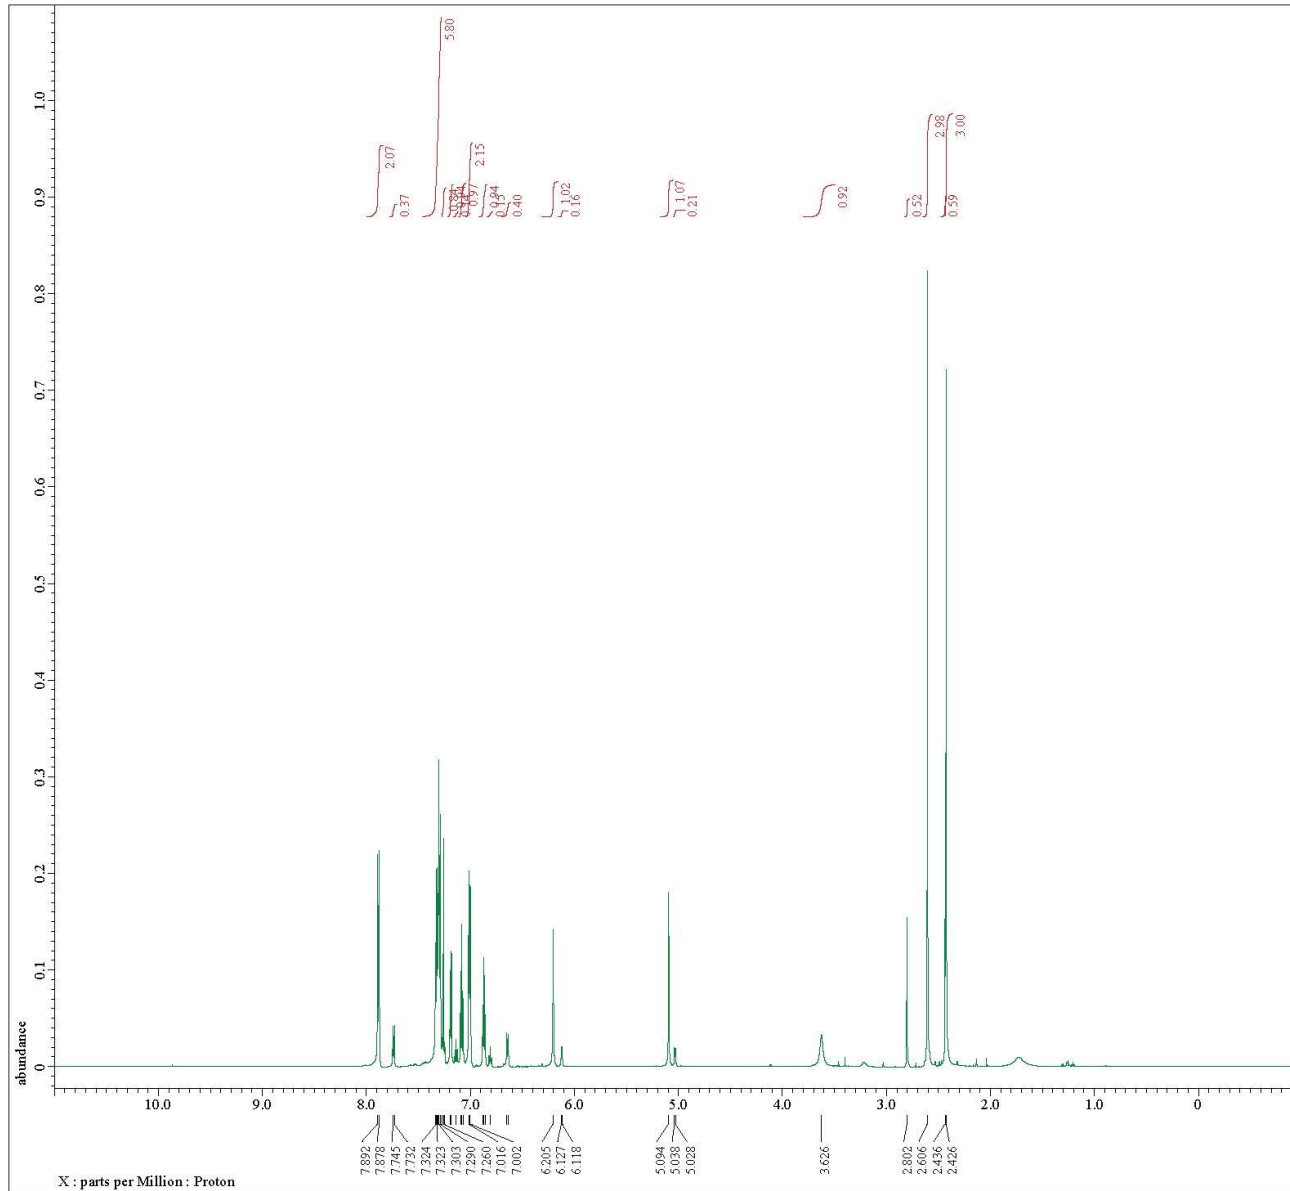

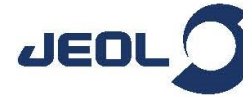

----- PROCESSING PARAMETERS -----  
blip\_cid( 16, 64, 1 )  
sexp( 2.0[Hz], 0.0[s] )  
##( 1, TRUE, TRUE )  
machinephase  
ppm

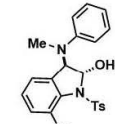

**trans-8ja**  
(*trans:cis* = 85:15)

Filename = TK-6-151-0-2\_carbon-1-2.jdf  
Author = delta  
Experiment = carbon\_jwp  
Sample\_id = TK-6-151-0-2  
Solvent = CHLOROFORM-D  
Actual\_Start\_Time = 26-JUN-2024 22:25:56  
Revision\_Time = 26-JUN-2024 22:52:26  
Data\_Format = 1D\_COMPLEX  
Dim\_Size = 26214  
X\_Domain = Carbon13  
F1m\_Title = Carbon13  
Dim\_Units = [ppm]  
Dimensions = 1  
Spectrometer = JNM-ECZ600R/S3  
Field\_Strength = 14.09636828[T] (600[MHz])  
X\_Acq\_Duration = 0.69206016[s]  
X\_Domain = Carbon13  
X\_Freq = 150.91343039[MHz]  
X\_Offset = 100[ppm]  
X\_Points = 32768  
X\_Prescans = 1  
X\_Resolution = 1.44496100[Hz]  
X\_Sweep = 47.34848485[kHz]  
X\_Sweep\_Clipped = 37.87878788[kHz]  
Irr\_Domain = Proton  
Irr\_Freq = 600.1723046[MHz]  
Irr\_Offset = 5[ppm]  
Blanking = 15.0[us]  
Clipped = FALSE  
Scans = 128  
Total\_Scans = 128  
Relaxation\_Delay = 1[s]  
Recvr\_Gain = 56  
Temp\_Cec = 21[degC]  
X\_90\_Width = 8.1[us]  
X\_Acq\_Time = 0.69206016[s]  
X\_Angle = 30[deg]  
X\_Atra = 11[deg]  
X\_Pulse = 2.7[us]  
Irr\_Atn\_Dec = 25.803[dB]  
Irr\_Atn\_Dec\_Calc = 25.803[dB]  
Irr\_Atn\_Dec\_Default\_Calc = 25.803[dB]  
Irr\_Dec\_Bandwidth\_Hz = 7.23694211[kHz]  
Irr\_Dec\_Bandwidth\_Ppm = 12.05794078[ppm]  
Irr\_Dec\_Freq = 600.1723046[MHz]  
Irr\_Dec\_Merit\_Factor = 2.2  
Irr\_Decoupling = TRUE  
Irr\_Noise = FALSE  
Irr\_Noise = VAL72  
Irr\_Offset\_Default = 5[ppm]  
Irr\_Pwidth = 76[us]  
Irr\_Pwidth\_Default = 76[us]  
Irr\_Pwidth\_Default\_Calc = 76[us]  
Irr\_Pwidth\_Templ = 76[us]  
Irr\_Wurst = FALSE  
Decimation\_Rate = 0  
Initial\_Wait = 1[s]  
Noe\_Time = 1[s]  
Noe\_Time\_Flag = FALSE  
Relaxation\_Delay\_Calc = 0[s]  
Relaxation\_Delay\_Temp = 1[s]  
Relaxation\_Time = 1.69206016[s]

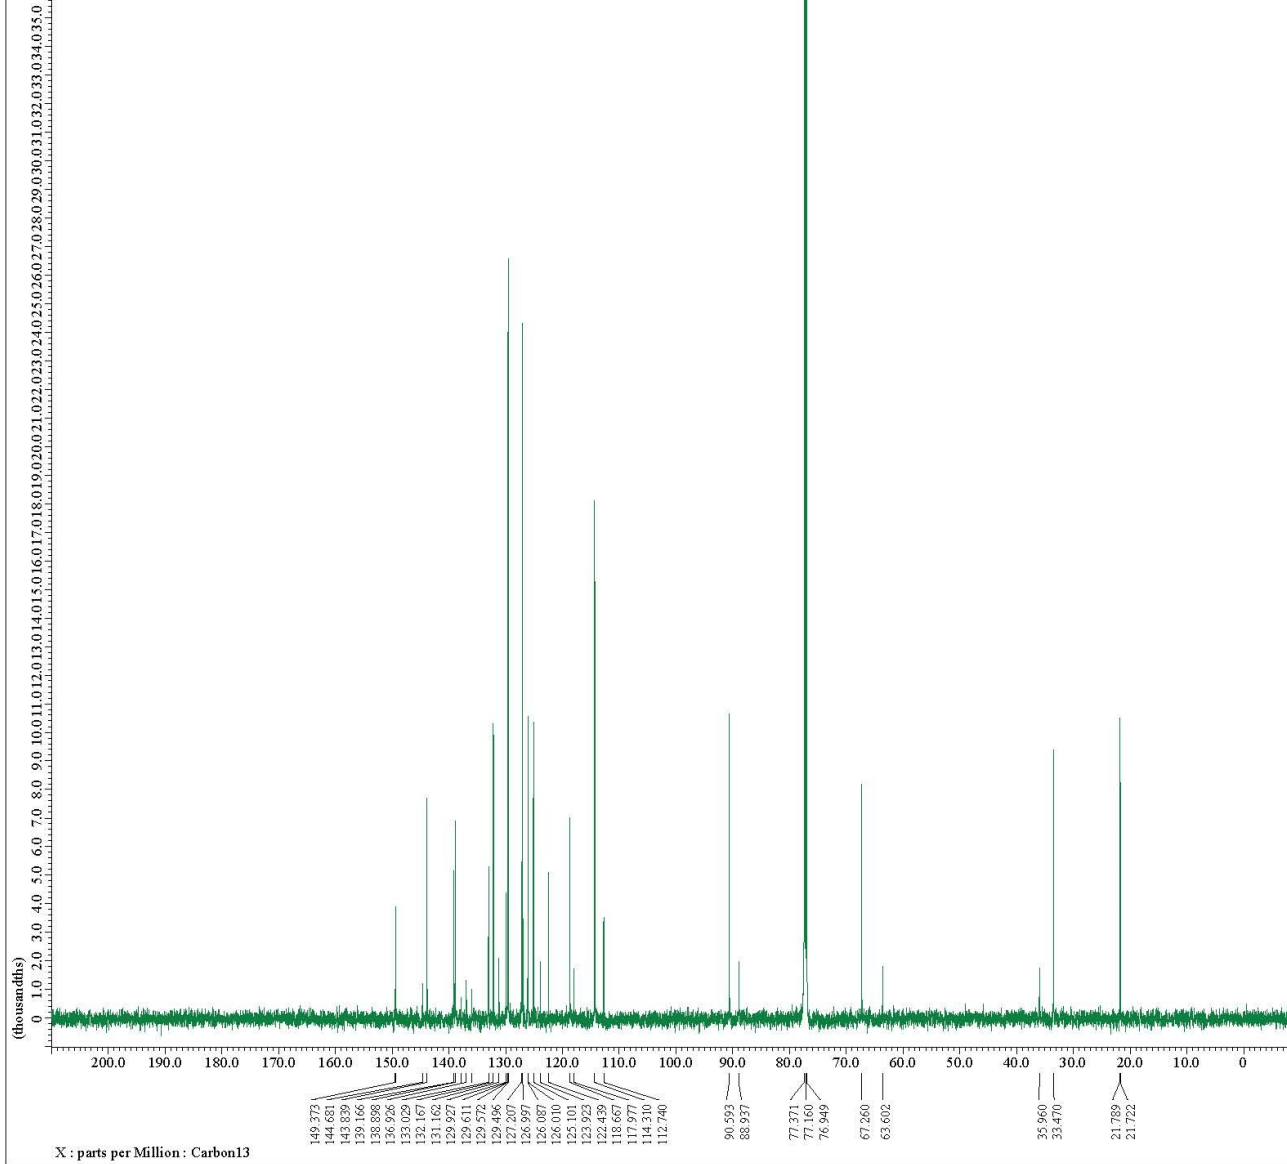

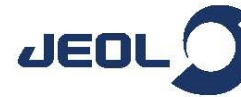

---- PROCESSING PARAMETERS ----  
sexp( 0.2[Hz], 0.0[s] )  
trapezoid( 0[Hz], 0[Hz], 80[Hz], 100[Hz] )  
zerofill( 1, TRUE )  
fft( 1, TRUE, TRUE )  
machephase

ppa  
base\_correct( Akima, 5, 0, FALSE, 3, None, FALSE )  
reference( 7.24787[ppm], 7.26[ppm] )  
thresh( 0.0068[Hz], 1, 3 )

以下由\*: TK-6-106-4-1-5 proton-1-1.jdf

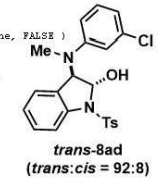

Filename = TK-6-106-4-1-5\_proton-1-3.jdf  
Author = delta  
Experiment = proton.jxp  
Sample\_id = TK-6-106-4-1-5  
Solvent = CHLOROFORM-D  
Actual\_Start\_Time = 25-JUN-2024 21:56:23  
Revision\_Time = 5-AUG-2024 11:25:45

Data Format = 1D REAL  
Data Size = 26214  
X\_Domain = Proton  
Data Title = Proton  
Data Units = (ppm)  
Dimensions = X  
Spectrometer = JNM-EC2600R/S3

Field Strength = 14.0963928[T] (600[MHz])  
X\_AcqDuration = 2.18365952[s]  
X\_Domain = Proton  
X\_Freq = 600.1723046[MHz]  
X\_Offset = 5[ppm]  
X\_Points = 32768  
X\_Prescans = 1  
X\_Resolution = 0.45794605[Hz]  
X\_Sweep = 15.0060024[KHz]  
X\_Sweep\_Clippped = 12.00480192[KHz]  
Irr\_Domain = Proton  
Irr\_Freq = 600.1723046[MHz]  
Irr\_Offset = 5[ppm]  
Tri\_Domain = Proton  
Tri\_Freq = 600.1723046[MHz]  
Tri\_Offset = 5[ppm]  
Blanking = 5.0[us]  
Clipped = FALSE  
Scans = 4  
Total\_scans = 4

Relaxation\_Delay = 2[s]  
Recvr Gain = 36  
Temp\_Set = 20.9[degC]  
X\_90\_Pulse = 9.9[us]  
X\_Acq Time = 2.18365952[s]  
X\_Angle = 45[deg]  
X\_Attn = 8.1[dB]  
X\_Pulse = 4.95[us]  
Irr\_Mode = Off  
Tri\_Mode = Off  
Dante Loop = 200  
Dante\_Preset = FALSE  
Decimation\_Rate = 0  
Initial\_Wait = 1[s]  
Phase = (0, 90, 270, 180, 180, 270, 90, 0)  
Preset\_Time = 2[s]  
Preset\_Time\_Play = FALSE  
Relaxation\_Delay\_Calc = 0[s]  
Relaxation\_Delay\_Temp = 2[s]  
Repetition\_Time = 4.18365952[s]

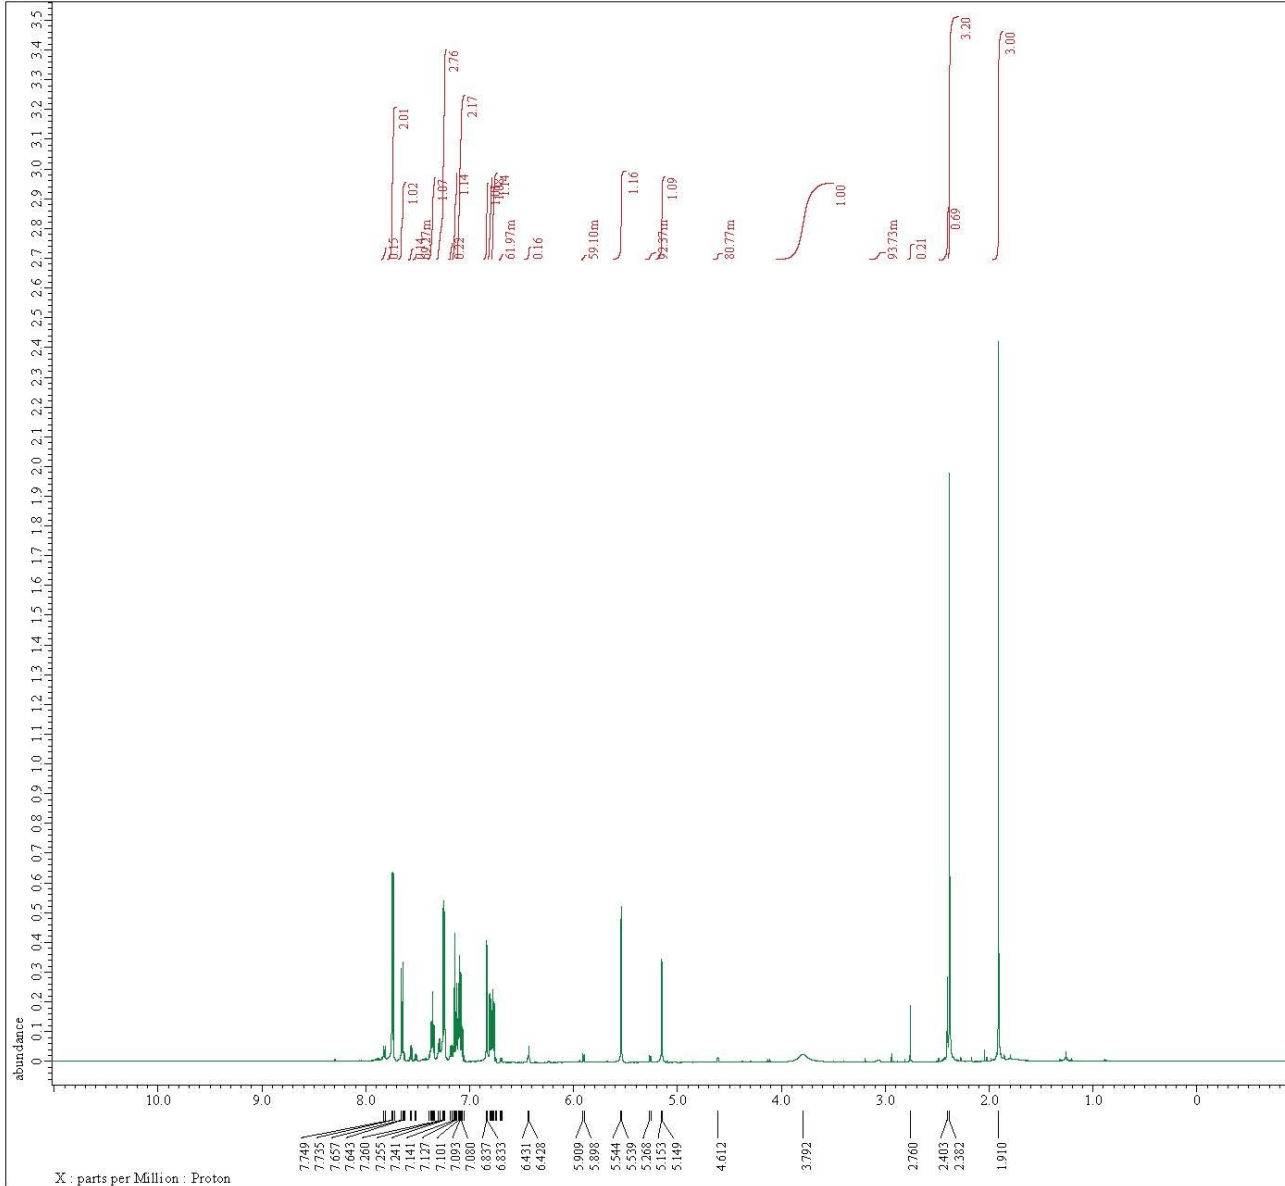

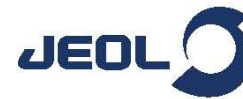

---- PROCESSING PARAMETERS ----  
blip\_cld( 16, 64, 1 )  
sexp( 2.0[Hz], 0.0[s] )  
fft( 1, TRUE, TRUE )  
machinphase  
ppa

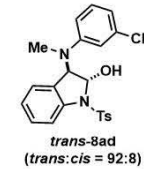

Filename = TK-6-106-4-1-5\_carbon-1-2.jdf  
Author = delta  
Experiment = carbon.jxp  
Sample\_Id = TK-6-106-4-1-5  
Solvent = CHLOROFORM-D  
Actual\_Start\_Time = 25-JUN-2024 21:58:23  
Revision\_Time = 25-JUN-2024 21:56:06

Data\_Format = ID\_COMPLEX  
Dia\_Size = 262.4  
X\_Domain = Carbon13  
Dia\_Title = Carbon13  
Dia\_Units = [ppm]  
Dimensions = X  
Spectrometer = JNM-ECZ600R/S3

Field\_Strength = 14.09636928[T] (600[MHz])  
X\_Acq\_Duration = 0.69206016[s]  
X\_Domain = Carbon13  
X\_Freq = 150.9134309[MHz]  
X\_Offset = 100[ppm]  
X\_Points = 32768  
X\_Prescans = 1  
X\_Resolution = 1.44496109[Hz]  
X\_Sweep = 47.3484848[kHz]  
X\_Sweep\_Clipped = 37.878788[kHz]  
Irr\_Domain = Proton  
Irr\_Freq = 600.1723046[MHz]  
Irr\_Offset = 5[ppm]  
Blinking = 15.0[us]  
Clipped = FALSE  
Scans = 16  
Total\_Scans = 16

Relaxation\_Delay = 1[s]  
Recvr\_Gain = 58  
Temp\_Get = 21.3[degC]  
X\_50\_Width = 8.1[us]  
X\_Acq\_Time = 0.69206016[s]  
X\_Angle = 30[deg]  
X\_Atn = 11[dB]  
X\_Pulse = 2.7[us]  
Irr\_Atn\_Dec = 25.803[dB]  
Irr\_Atn\_Dec\_Calc = 25.803[dB]  
Irr\_Atn\_Dec\_Default\_Calc = 25.803[dB]  
Irr\_Dec\_Bandwidth\_Hz = 7.23684211[kHz]  
Irr\_Dec\_Bandwidth\_Ppm = 12.05794078[ppm]  
Irr\_Dec\_Freq = 600.1723046[MHz]  
Irr\_Dec\_Merit\_Factor = 2.2  
Irr\_Decoupling = TRUE  
Irr\_Noise = FALSE  
Irr\_Noise = WALTZ  
Irr\_Offset\_Default = 5[ppm]  
Irr\_Pwidth = 76[us]  
Irr\_Pwidth\_Default = 76[us]  
Irr\_Pwidth\_Default\_Calc = 76[us]  
Irr\_Pwidth\_Templ = 76[us]  
Irr\_Wurst = FALSE  
Decoupling\_Rate = 0  
Initial\_Wait = 1[s]  
Noe\_Time = 1[s]  
Noe\_Time\_Flag = FALSE  
Relaxation\_Delay\_Calc = 0[s]  
Relaxation\_Delay\_Temp = 1[s]  
Repetition\_Time = 1.69206016[s]

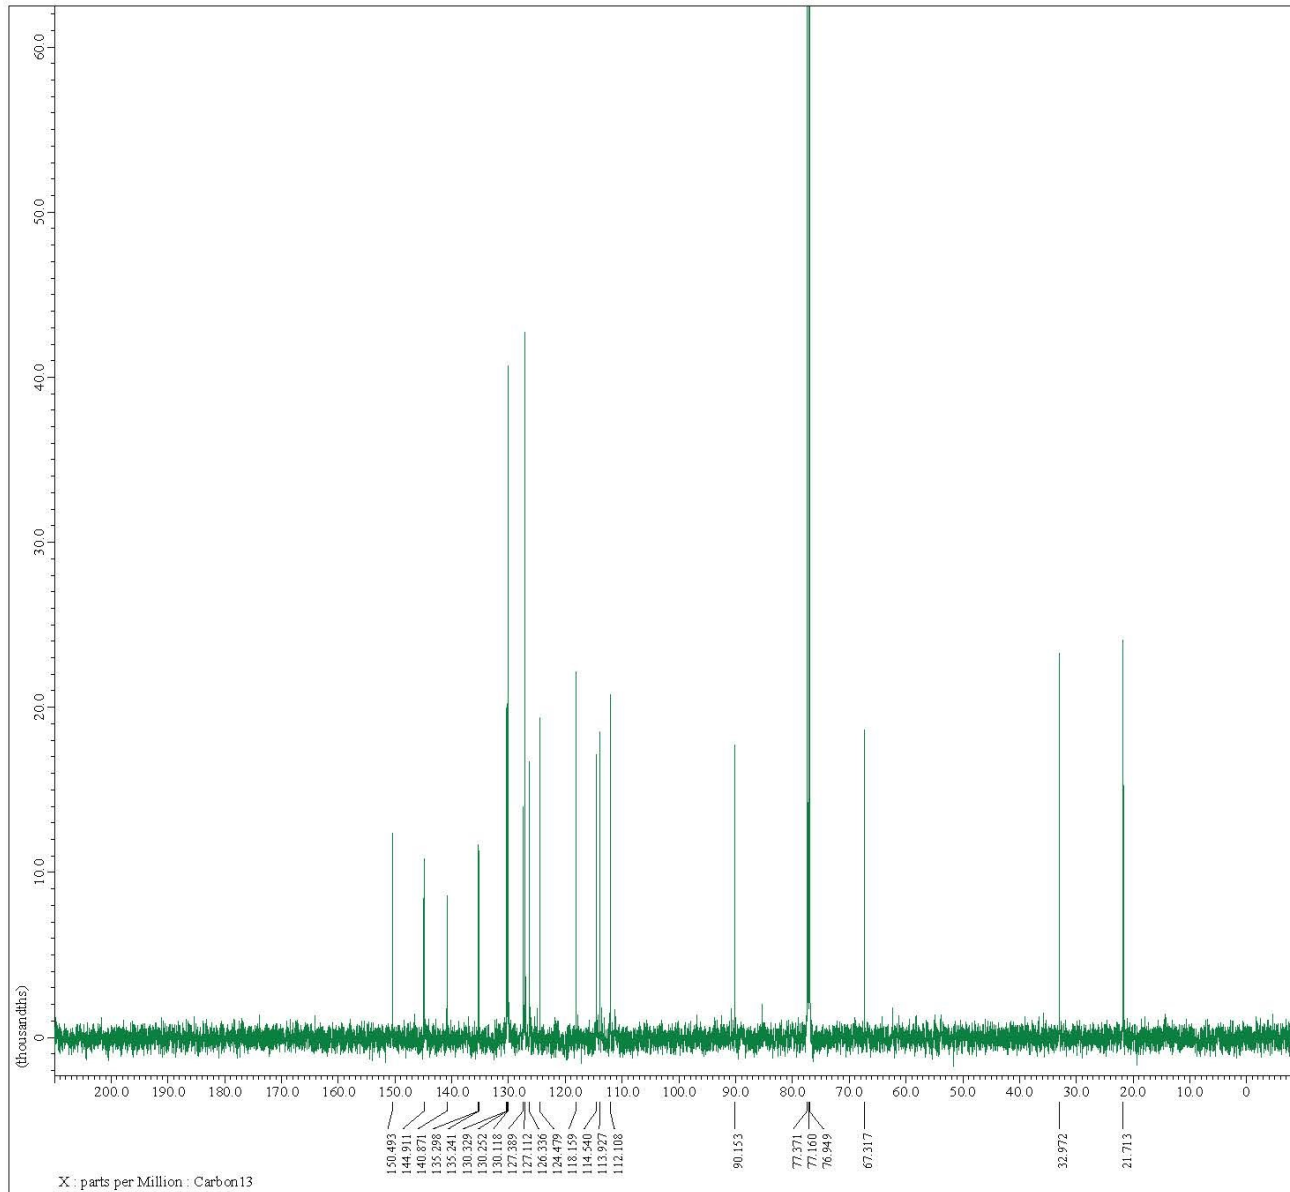

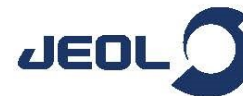

---- PROCESSING PARAMETERS ----  
sexp( 0.2[Hz], 0.0[s], 1 )  
trapexoid( 0[Hz], 0[Hz], 80[Hz], 100[Hz] )  
sarcfill( 1, TRUE )  
fft( 1, TRUE, TRUE )  
machinephase  
base correct( Akima, 5, 0, FALSE, 3, None, FALSE )  
reference( 7.24787[ppm], 7.26[ppm] )  
thresh( 0.25655[Hz], 1, )  
以下由#: TK-6-300-1 proton-1-1.jdf

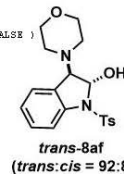

Filename = TK-6-300-1\_proton-1-3.jdf  
Author = delta  
Experiment = proton.jsp  
Sample Id = TK-6-300-1  
Solvent = CHLOROFORM-D  
Actual\_Start\_Time = 28-JUN-2024 21:49:59  
Revision\_Time = 5-AUG-2024 11:31:11  
Data Format = 1D REAL  
Dim Size = 25214  
X\_Domain = Proton  
Dim Title = Proton  
Dim Units = (ppm)  
Dimensions = X  
Spectrometer = JNM-ECZ600R/S3  
Field\_Strength = 14.09636928[T] (600[MHz])  
X\_Acq\_Duration = 2.18365952[s]  
X\_Domain = Proton  
X\_Freq = 600.1723046[MHz]  
X\_Offset = 8[ppm]  
X\_Points = 32768  
X\_Prescans = 1  
X\_Resolution = 0.45794695[Hz]  
X\_Sweep = 15.0060024[Hz]  
X\_Sweep\_Clipped = 12.00480192[Hz]  
Irr\_Domain = Proton  
Irr\_Freq = 600.1723046[MHz]  
Irr\_Offset = 8[ppm]  
Tri\_Domain = Proton  
Tri\_Freq = 600.1723046[MHz]  
Tri\_Offset = 8[ppm]  
Blanking = 5.0[us]  
Clipped = FALSE  
Scans = 4  
Total\_Scans = 4  
Relaxation\_Delay = 2[s]  
Recvs\_Gain = 26  
Temp\_Gct = 21.3[degC]  
X\_90\_Width = 9.9[us]  
X\_Acq\_Time = 2.18365952[s]  
X\_Angle = 45[deg]  
X\_Atn = 8.1[dB]  
X\_Pulse = 4.95[us]  
Irr\_Mode = Off  
Tri\_Mode = Off  
Dante\_Loop = 200  
Dante\_Preset = FALSE  
Decimation\_Rate = 0  
Initial\_Wait = 1[s]  
Phase = (0, 90, 270, 180, 180, 270, 90, 0)  
Preset\_Time = 2[s]  
Preset\_Time\_Flag = FALSE  
Relaxation\_Delay\_Calc = 0[s]  
Relaxation\_Delay\_Temp = 2[s]  
Repetition\_Time = 4.18365952[s]

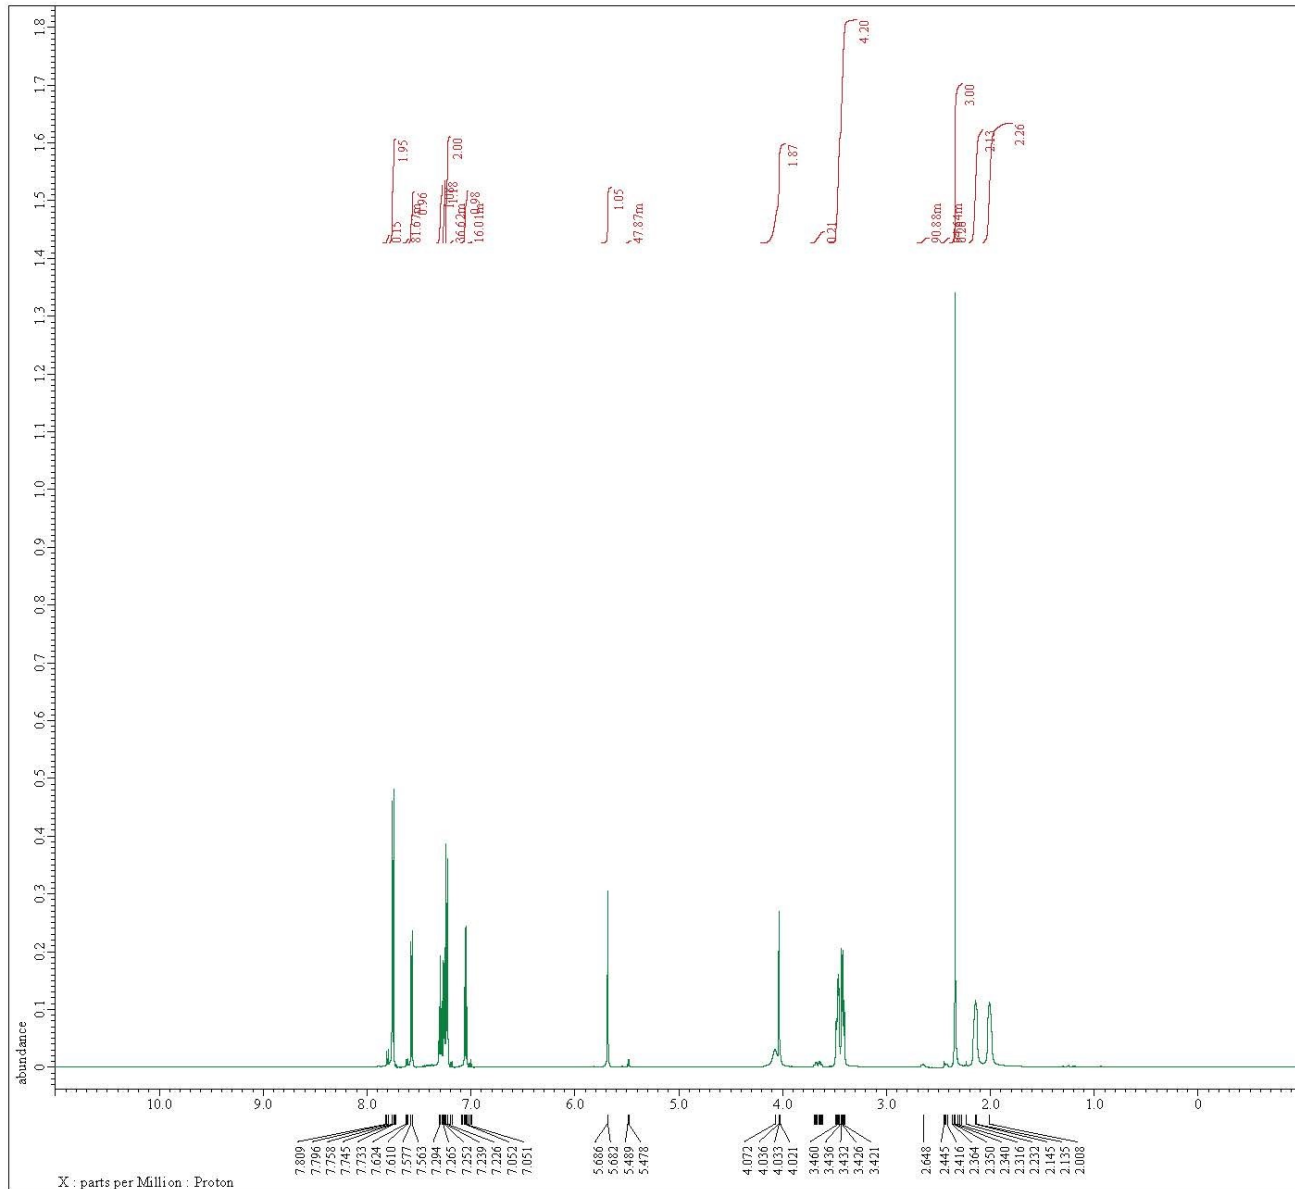

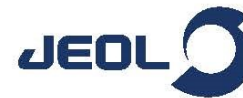

--- PROCESSING PARAMETERS ---  
blip\_cld(15, 64, 1)  
sextf(2.0Hz, 0.0[s])  
fft(1, TRUE, TRUE)  
machinephase  
ppm

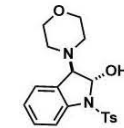

Filename = TK-6-300-1\_carbon-1-2.jdf  
Author = delta  
Experiment = carbon.jsp  
Sample\_Id = TK-6-300-1  
Solvent = CHLOROFORM-D  
Actual\_Start\_Time = 29-JUN-2024 21:50:48  
Revision\_Time = 29-JUN-2024 21:51:09

Data Format = 1D COMPLEX  
Dim\_Size = 26214  
X\_Domain = Carbon13  
Dim\_Title = Carbon13  
Dim\_Units = [ppm]  
Dimensions = X  
Spectrometer = JNM-EC2500R/S3

Field\_Strength = 14.09636228 [T] (600 [MHz])  
X\_Acq\_Duration = 0.69206016 [s]  
X\_Domain = Carbon13  
X\_Freq = 150.91343039 [MHz]  
X\_Offset = 100 [ppm]  
X\_Points = 32768  
X\_Prescans = 1  
X\_Resolution = 1.44496109 [Hz]  
X\_Sweep = 47.34846485 [kHz]  
X\_Sweep\_Clipped = 37.87878788 [kHz]  
X\_Domain = Proton  
X\_Freq = 600.1723046 [MHz]  
X\_Offset = 5 [ppm]  
X\_Sweep = 15.0 [us]  
Clipped = FALSE  
Scans = 66  
Total\_Scans = 66

Relaxation\_Delay = 1 [s]  
Recvr\_Gain = 66  
Temp\_Det = 21.2 [dC]  
X\_90\_Width = 8.1 [us]  
X\_Acq\_Time = 0.69206016 [s]  
X\_Angle = 30 [deg]  
X\_Acn = 1 [dB]  
X\_Pulse = 2.7 [us]  
Irr\_Atn\_Dec = 25.803 [dB]  
Irr\_Atn\_Dec\_Calc = 25.803 [dB]  
Irr\_Atn\_Dec\_Default\_Calc = 25.803 [dB]  
Irr\_Dec\_Bandwidth\_Hz = 7.23684211 [kHz]  
Irr\_Dec\_Bandwidth\_Ppm = 12.05794078 [ppm]  
Irr\_Dec\_Freq = 600.1723046 [MHz]  
Irr\_Dec\_Merit\_Factor = 2.2  
Irr\_Decoupling = TRUE  
Irr\_Noise = FALSE  
Irr\_Noise = WALTZ  
Irr\_Offset\_Default = 5 [ppm]  
Irr\_Pwtdch = 76 [us]  
Irr\_Pwtdch\_Default = 76 [us]  
Irr\_Pwtdch\_Default\_Calc = 76 [us]  
Irr\_Pwtdch\_Temp1 = 76 [us]  
Irr\_Wurst = FALSE  
Decimation\_Rate = 0  
Initial\_Wait = 1 [s]  
Noe\_Time = 1 [s]  
Noe\_Time\_Play = FALSE  
Relaxation\_Delay\_Calc = 0 [s]  
Relaxation\_Delay\_Temp = 1 [s]  
Repetition\_Time = 1.69206016 [s]

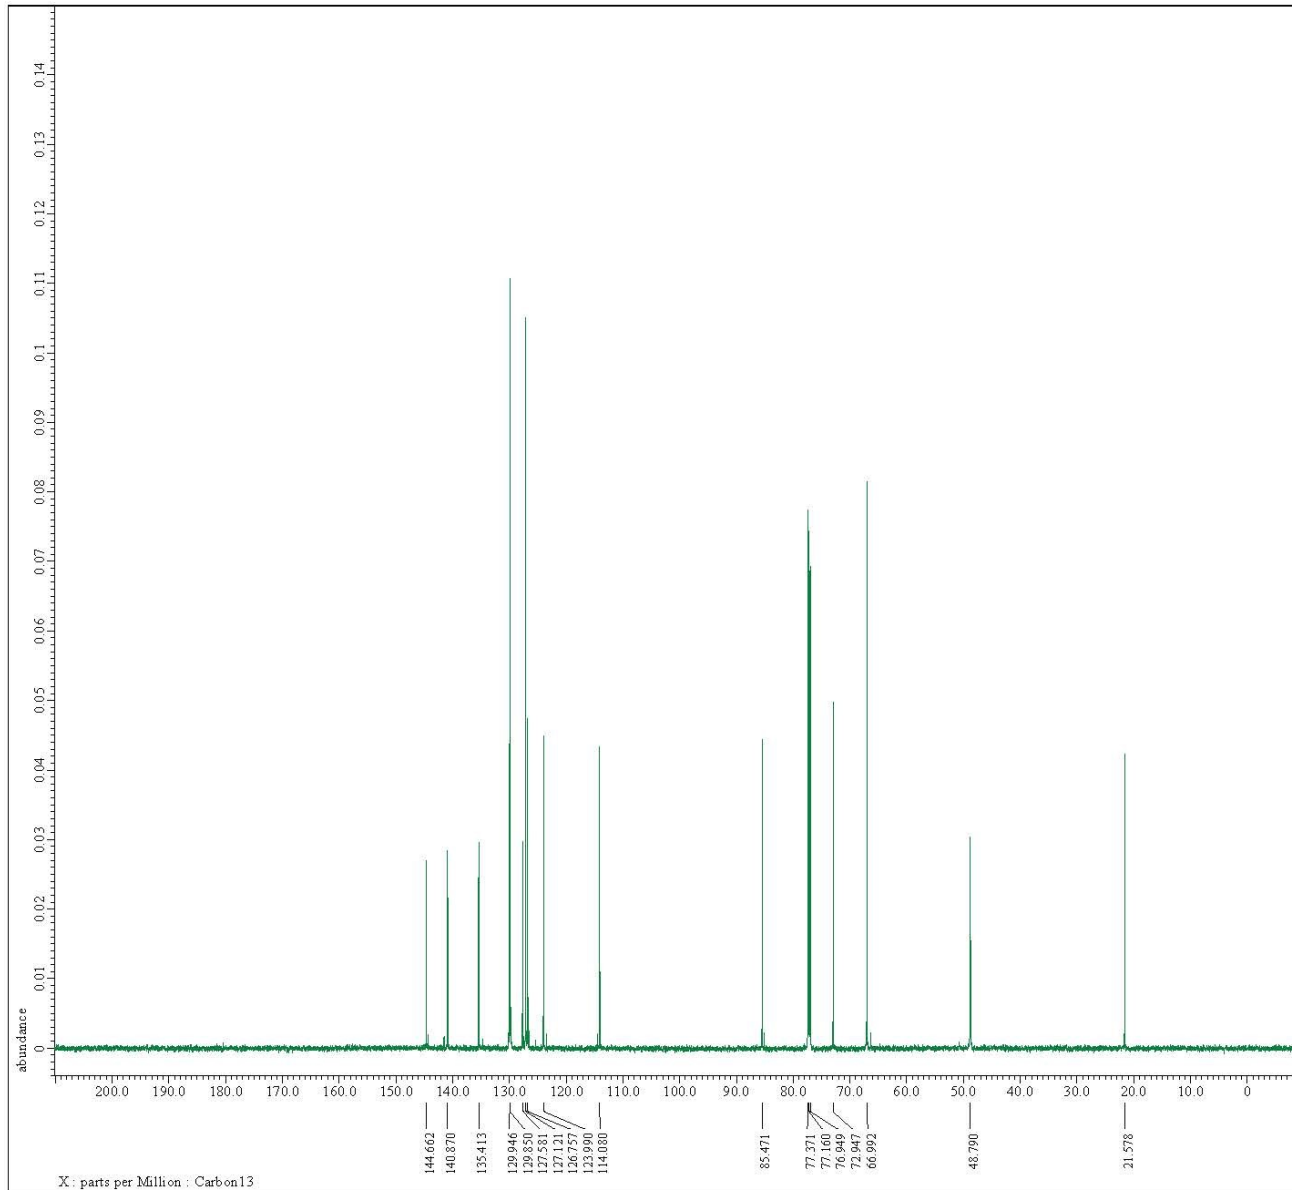

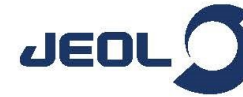

---- PROCESSING PARAMETERS ----  
sexp( 0.2[Hz], 0.0[s] )  
trapezoid( 0[Hz], 0[Hz], 80[Hz], 100[Hz] )  
zerofill( 1, TRUE )  
fft( 1, TRUE, TRUE )  
machinephase

ppm  
base correct ( Akima, 5, 0, FALSE, 3, None, FALSE )  
reference( 7.24711[ppm], 7.26[ppm] )  
thresh( 0.61274[Hz], 1, 1 )

以下由表: TK-6-122-4-15 proton-1-1.jdf

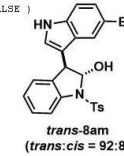

Filename = TK-6-122-4-15\_proton-1-3.jdf  
Author = delta  
Experiment = proton.jxp  
Sample Id = TK-6-122-4-15  
Solvent = CHLOROFORM-D  
Actual Start Time = 1-JUL-2024 19:51:37  
Revision Time = 5-AUG-2024 11:39:15

Data Format = 1D REAL  
Dim Size = 26214  
X Domain = Proton  
Dim Title = Proton  
Dim Units = [ppm]  
Dimensions = X  
Spectrometer = JNM-ECZ600R/S3

Field Strength = 14.09636928[T] (600[MHz])  
X Acq Duration = 2.18365952[s]  
X Domain = Proton  
X Freq = 600.1723046[MHz]  
X Offset = 5[ppm]  
X Points = 32768  
X Prescans = 1  
X Resolution = 0.45794685[Hz]  
X Sweep = 15.0060024[kHz]  
X Sweep Clipped = 12.00480192[kHz]  
Irr Domain = Proton  
Irr Freq = 600.1723046[MHz]  
Irr Offset = 5[ppm]  
Tri Domain = Proton  
Tri Freq = 600.1723046[MHz]  
Tri Offset = 5[ppm]  
Blanking Clipped = FALSE  
Scans = 4  
Total Scans = 4

Relaxation Delay = 2[s]  
Recvr Gain = 36  
Temp Get = 20.9[degC]  
X 90 Width = 9.9[us]  
X Acq Time = 2.18365952[s]  
X Angle = 45[deg]  
X Atn = 8.1[dB]  
X Pulse = 4.95[us]  
Irr Mode = Off  
Tri Mode = Off  
danFe Loop = 200  
Dante\_Preset = FALSE  
Decimation Rate = 0  
Initial Wait = 1[s]  
Phase = (0, 90, 270, 180, 180, 270, 90, 0)  
Preset Time = 2[s]  
Preset Time Flag = FALSE  
Relaxation Delay Calc = 0[s]  
Relaxation Delay Temp = 2[s]  
Repetition Time = 4.18365952[s]

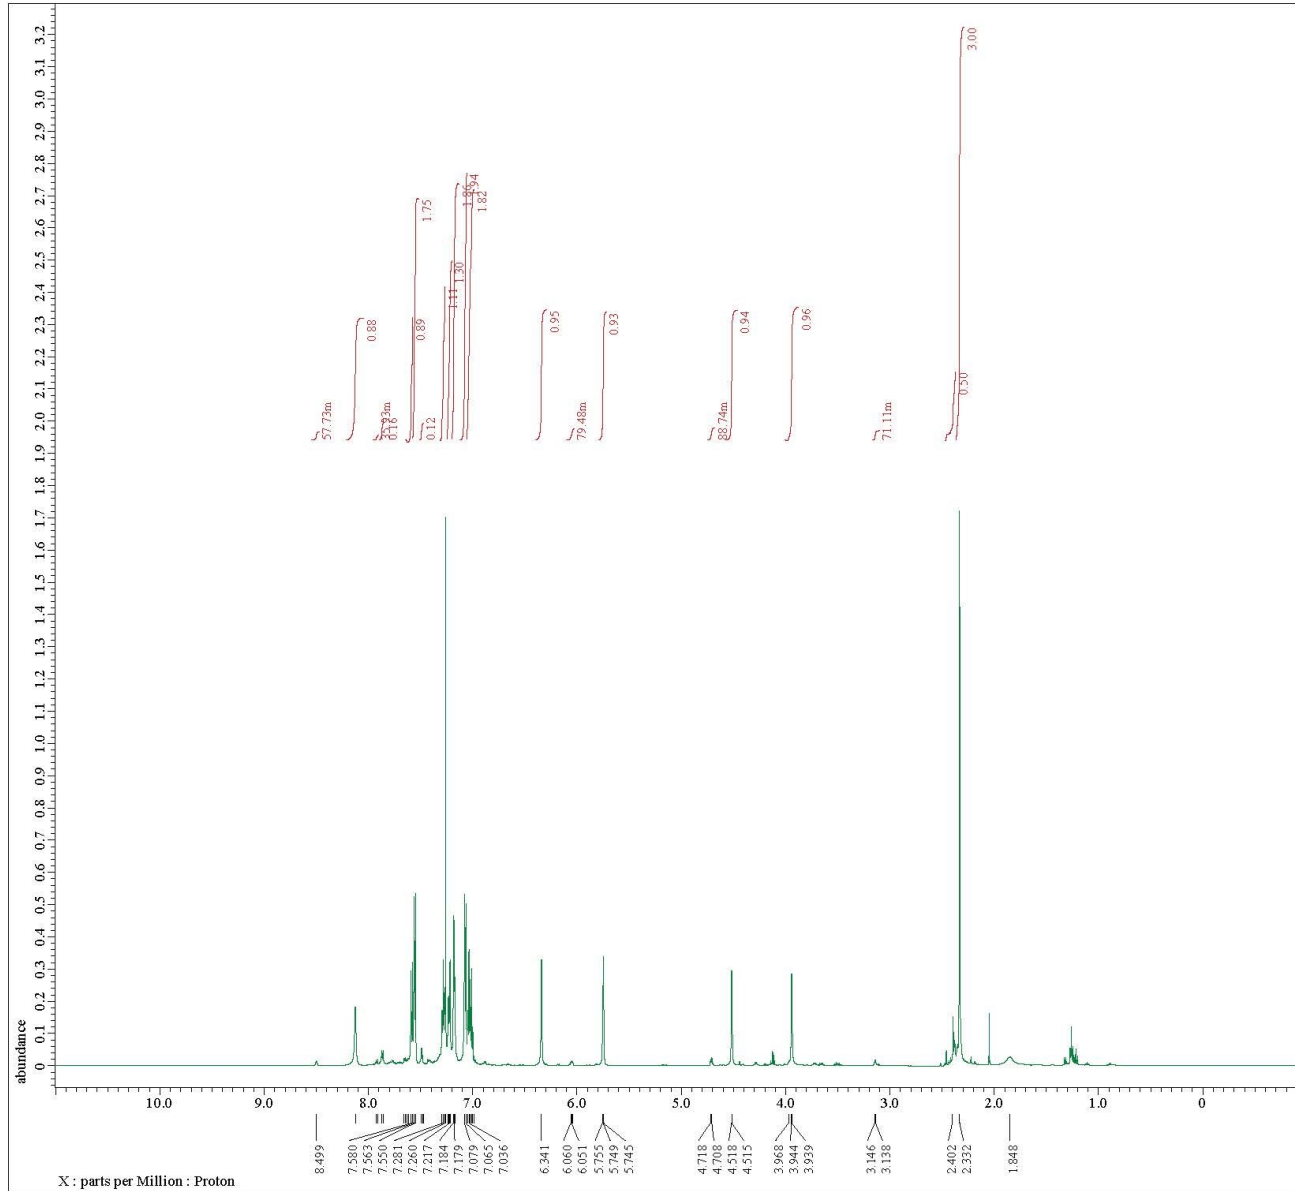



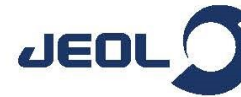

---- PROCESSING PARAMETERS ----

```
blip_cld( 16, 64, 1 )
secp( 2.0[Hz], 0.0[s] )
ref( 1, TRUE, TRUE )
machinephase
ppa
```

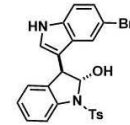

**trans-8am**  
(trans:cis = 92:8)

```
Filename = TK-6-122-4-15_carbon-1-2_3df
Author = delta
Experiment = carbon_3xp
Sample_Id = TK-6-122-4-15
Solvent = CHLOROFORM-D
Actual_Start_Time = 1-JUL-2024 19:52:34
Revision_Time = 1-JUL-2024 19:54:32

Data_Format = 1D COMPLEX
Dia_Size = 26214
X_Domain = Carbon13
Dia_Title = Carbon13
Dia_Units = [ppm]
Dimensions = X
Spectrometer = JNM-ECZ600R/S3

Field_Strength = 14.09636928[T] (600[MHz])
X_Acq_Duration = 0.69206016[s]
X_Domain = Carbon13
X_Freq = 150.91343039[MHz]
X_Offset = 100[ppm]
X_Points = 32768
X_Prescans = 1
X_Resolution = 1.44496109[Hz]
X_Sweep = 47.3484848[kHz]
X_Sweep_Clipped = 37.8787878[kHz]
Irr_Domain = Proton
Irr_Freq = 600.1723046[MHz]
Irr_Offset = 5[ppm]
Blanking = 15.0[us]
Clipped = FALSE
Scans = 130
Total_Scans = 130

Relaxation_Delay = 1[s]
Recv_Gain = 56
Temp_Set = 21[dC]
X_90_Width = 8.1[us]
X_Acq_Time = 0.69206016[s]
X_Angle = 30[deg]
X_Atn = 11[dB]
X_Pulse = 2.7[us]
Irr_Atn_Dec = 25.803[dB]
Irr_Atn_Dec_Calc = 25.803[dB]
Irr_Atn_Dec_Default_Calc = 25.803[dB]
Irr_Dec_Bandwidth_Mz = 7.23664211[kHz]
Irr_Dec_Bandwidth_Ppm = 12.05794079[ppm]
Irr_Dec_Freq = 600.1723046[MHz]
Irr_Dec_Merit_Factor = 2.2
Irr_Decoupling = TRUE
Irr_Mode = FALSE
Irr_Noise = WAITZ
Irr_Offset_Default = 6[ppm]
Irr_Width = 76[us]
Irr_Width_Default = 76[us]
Irr_Width_Default_Calc = 76[us]
Irr_Width_Templ = 76[us]
Irr_Wurst = FALSE
Decision_Rate = 0
Initial_Wait = 1[s]
Noe_Time = 1[s]
Noe_Time_Flag = FALSE
Relaxation_Delay_Calc = 0[s]
Relaxation_Delay_Temp = 1[s]
Repetition_Time = 1.69206016[s]
```

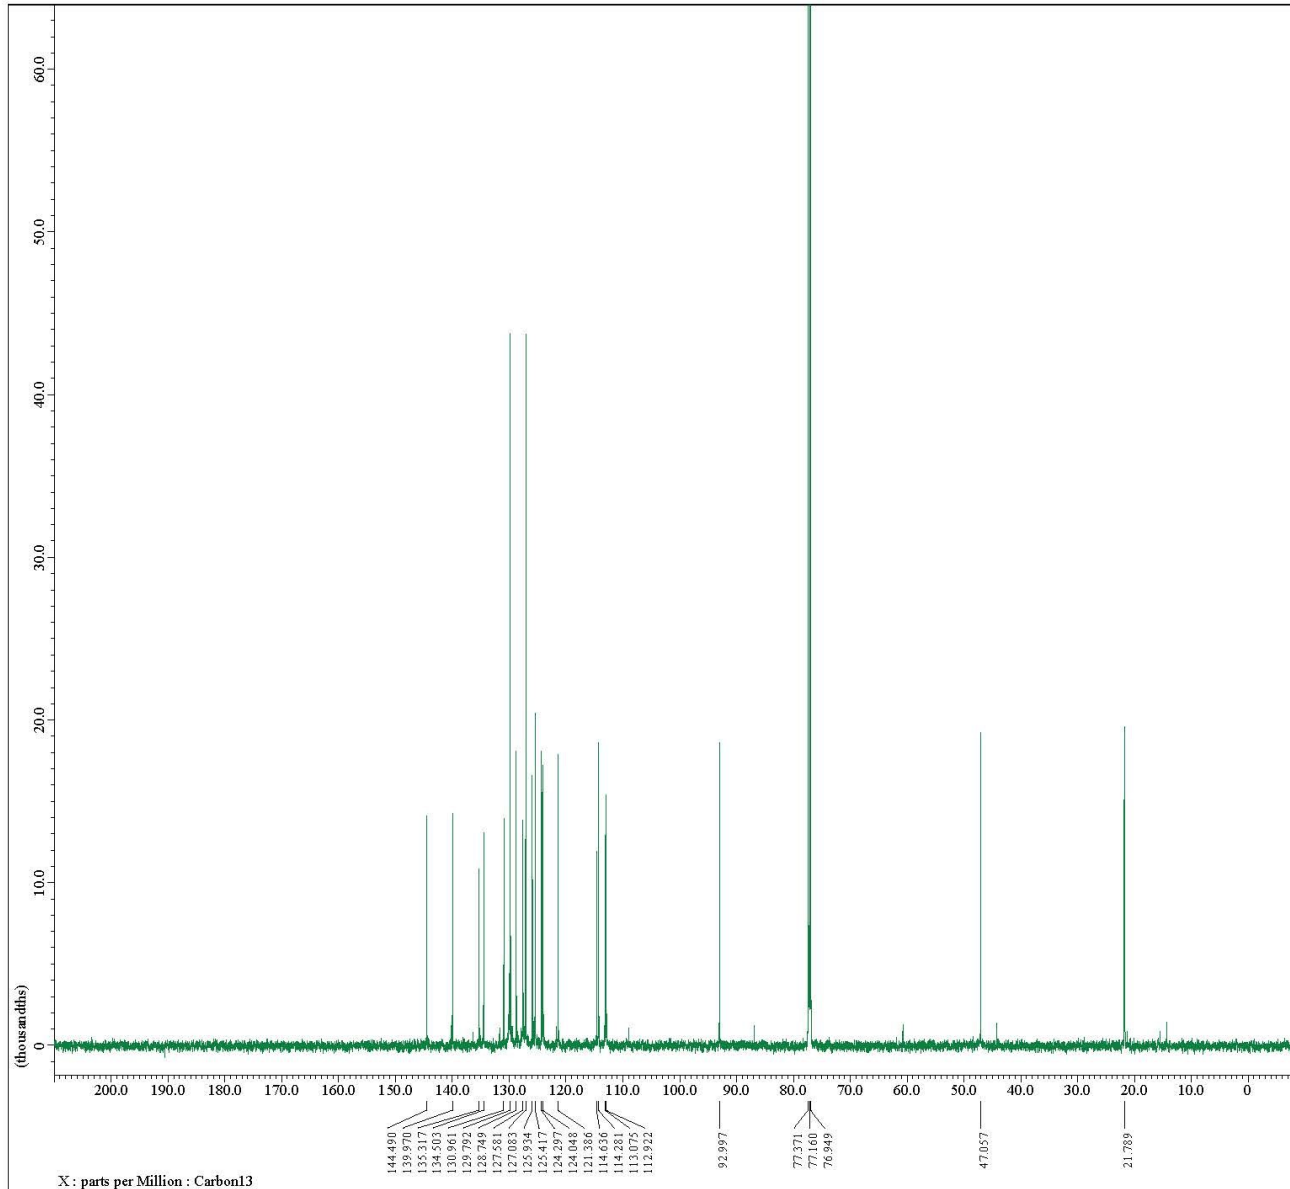

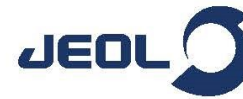

--- PROCESSING PARAMETERS ---  
sexp( 0.2[Hz], 0.0[s] )  
trapezoid( 0[%], 0[%], 80[%], 100[%] )  
zerofill( 1, TRUE )  
fft( 1, TRUE, TRUE )  
machinephase  
pfa  
base\_correct( Akima, 5, 0, FALSE, 3, None, FALSE )

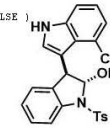

**trans-Ban**  
(trans:cis = 81:19)

Filename = TK-6-300-4-1\_proton-1-4.jdf  
Author = delta  
Experiment = proton.jxp  
Sample\_Id = TK-6-300-4-1  
Solvent = CHLOROFORM-D  
Actual\_Start\_Time = 5-AUG-2024 12:17:16  
Revision\_Time = 5-AUG-2024 12:24:04  
Data\_Format = 1D REAL  
Dia\_Size = 2621.4  
X\_Domain = Proton  
Dia\_Title = Proton  
Dia\_Units = [ppm]  
Dimensions = X  
Spectrometer = JNM-EC2600R/S3  
Field\_Strength = 14.09636928[T] (600[MHz])  
X\_Acq\_Duration = 2.91110912[s]  
X\_Domain = Proton  
X\_Freq = 600.1723046[MHz]  
X\_Offset = 5[ppm]  
X\_Points = 32758  
X\_Prescans = 1  
X\_Resolution = 0.34251169[Hz]  
X\_Sweep = 11.2561909[kHz]  
X\_Sweep\_Clippped = 9.00495272[kHz]  
Itr\_Domain = Proton  
Itr\_Freq = 600.1723046[MHz]  
Itr\_Offset = 5[ppm]  
Tri\_Domain = Proton  
Tri\_Freq = 600.1723046[MHz]  
Tri\_Offset = 5[ppm]  
Blanking = 5.0[us]  
Clipped = FALSE  
Scans = 4  
Total\_Scans = 4  
Relaxation\_Delay = 2[s]  
Recv\_Gain = 36  
Temp\_Get = 45[dC]  
X\_90\_Width = 9.9[us]  
X\_Acq\_Time = 2.91110912[s]  
X\_Angle = 45[deg]  
X\_Attn = 8.1[dB]  
X\_Pulse = 4.35[us]  
Itr\_Mode = Off  
Tri\_Mode = Off  
Dante\_Loop = 200  
Dante\_Preset = FALSE  
Decimation\_Rate = 0  
Initial\_Wait = 1[s]  
Phase = (0, 90, 270, 180, 180, 270, 90, 0)  
Preset\_Time = 3[s]  
Preset\_Time\_Flag = FALSE  
Relaxation\_Delay\_Calc = 0[s]  
Relaxation\_Delay\_Temp = 2[s]  
Repetition\_Time = 4.91110912[s]

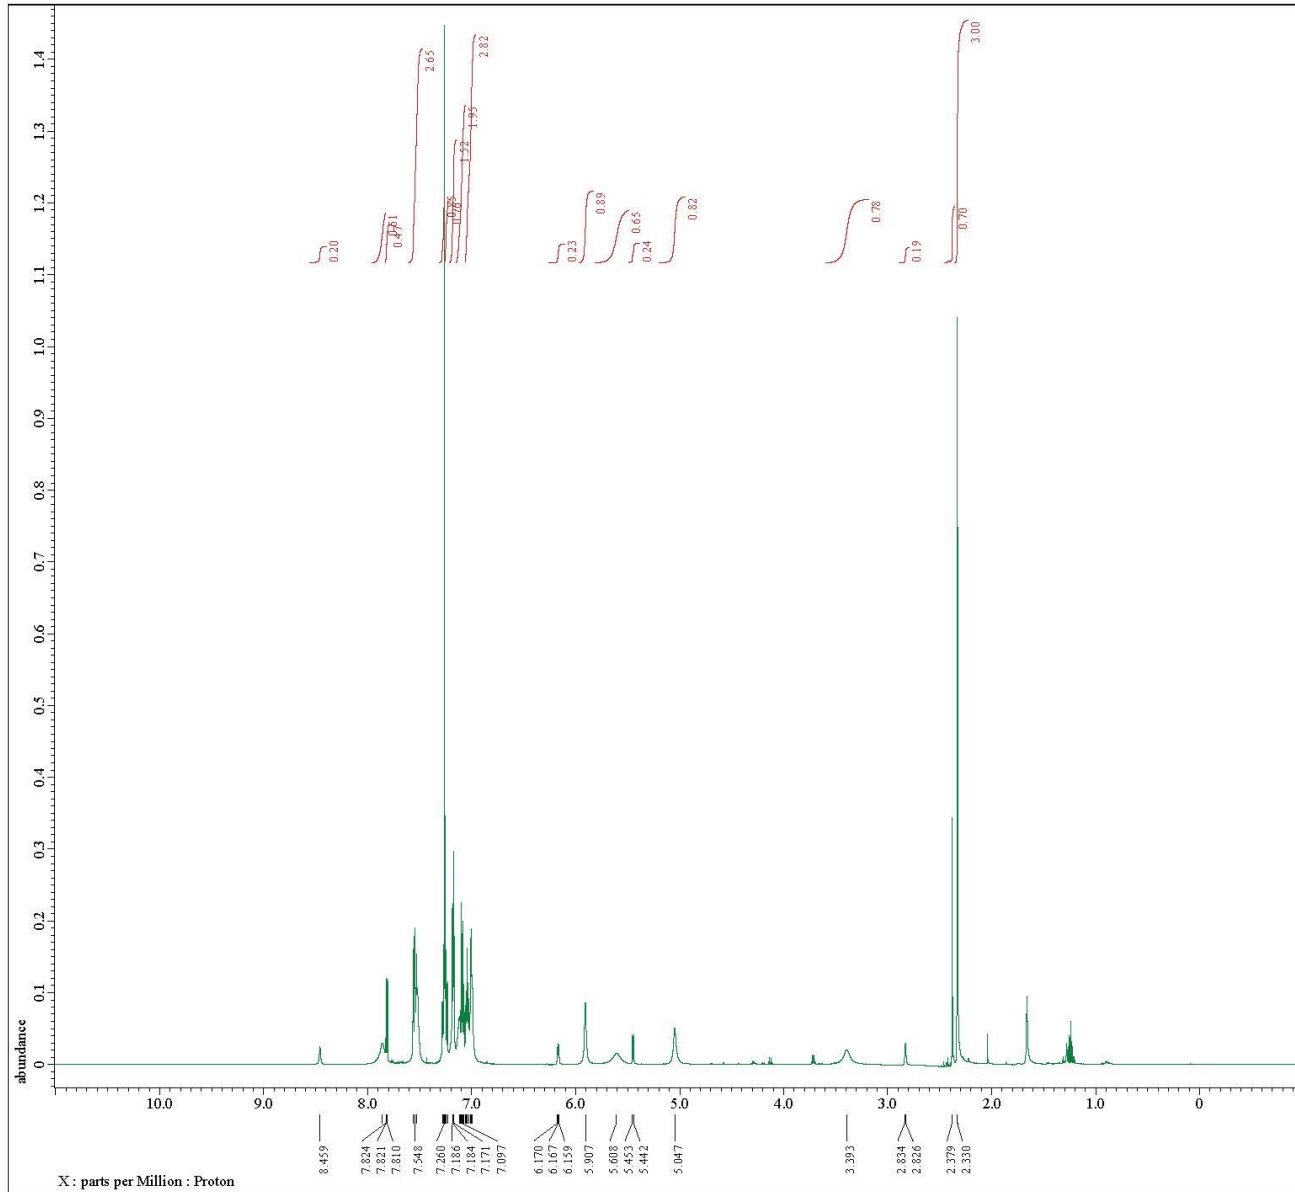

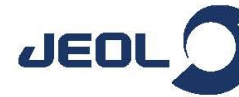

---- PROCESSING PARAMETERS ----  
blip cid( 16, 64, 1 )  
sexpt( 2.0[Hz], 0.0[s] )  
rrf( 1, TRUE, TRUE )  
machephase  
ppm

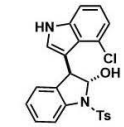

trans-8an  
(trans:cis = 81:19)

Filename = TK-6-122-1-5-2\_carbon-2-2.jdf  
Author = delta  
Experiment = carbon\_jxp  
Sample\_id = TK-6-122-1-5-2  
Solvent = CHLOROFORM-D  
Actual\_Start\_Time = 27-JUN-2024 22:37:31  
Revision\_Time = 27-JUN-2024 23:14:27

Data Format = 1D\_COMPLEX  
Dim Size = 26214  
X\_Domain = Carbon13  
Ym Title = Carbon13  
Dim Units = [ppm]  
Dimensions = X  
Spectrometer = JNM-EC260R/S3

Field Strength = 14.09636828[T] (600[MHz])  
X\_Acq Duration = 0.69206016[s]  
X\_Domain = Carbon13  
X\_Freq = 150.91343039[MHz]  
X\_Offset = 100[ppm]  
X Points = 32768  
X\_Prescans = 1  
X\_Resolution = 1.44496109[Hz]  
X\_Sweep = 47.34848485[kHz]  
X\_Sweep Clipped = 37.87878788[kHz]  
Irr\_Domain = Proton  
Irr\_Freq = 600.1723046[MHz]  
Irr\_Offset = 5[ppm]  
Blanking = 45.0[us]  
Clipped = FALSE  
Scans = 128  
Total Scans = 128

Relaxation\_Delay = 1[s]  
Recvr Gain = 56  
Temp\_Cec = 20.5[dC]  
X\_90 Width = 0.1[us]  
X\_Acq Time = 0.69206016[s]  
X\_Angle = 30[deg]  
X\_Atn = 11[dB]  
X\_Pulse = 2.7[us]  
Irr\_Atn Dec = 25.803[dB]  
Irr\_Atn Dec Calc = 25.803[dB]  
Irr\_Atn Dec Default Calc = 25.803[dB]  
Irr Dec Bandwidth\_Hz = 7.23684211[kHz]  
Irr Dec Bandwidth\_Ppm = 12.0594078[ppm]  
Irr Dec Freq = 600.1723046[MHz]  
Irr Dec Merit Factor = 2.2  
Irr Decoupling = TRUE  
Irr\_Noise = FALSE  
Irr\_Noise = WALTZ  
Irr\_Offset\_Default = 5[ppm]  
Irr\_Pwidth = 76[us]  
Irr\_Pwidth\_Default = 76[us]  
Irr\_Pwidth\_Default\_Calc = 76[us]  
Irr\_Pwidth\_Temp1 = 76[us]  
Irr\_Wurst = FALSE  
Reclamation\_Rate = 0  
Initial\_Wait = 1[s]  
Noe\_Time = 1[s]  
Noe\_Time\_Flag = FALSE  
Relaxation\_Delay\_Calc = 0[s]  
Relaxation\_Delay\_Temp = 1[s]  
Repetition\_Time = 1.69206016[s]

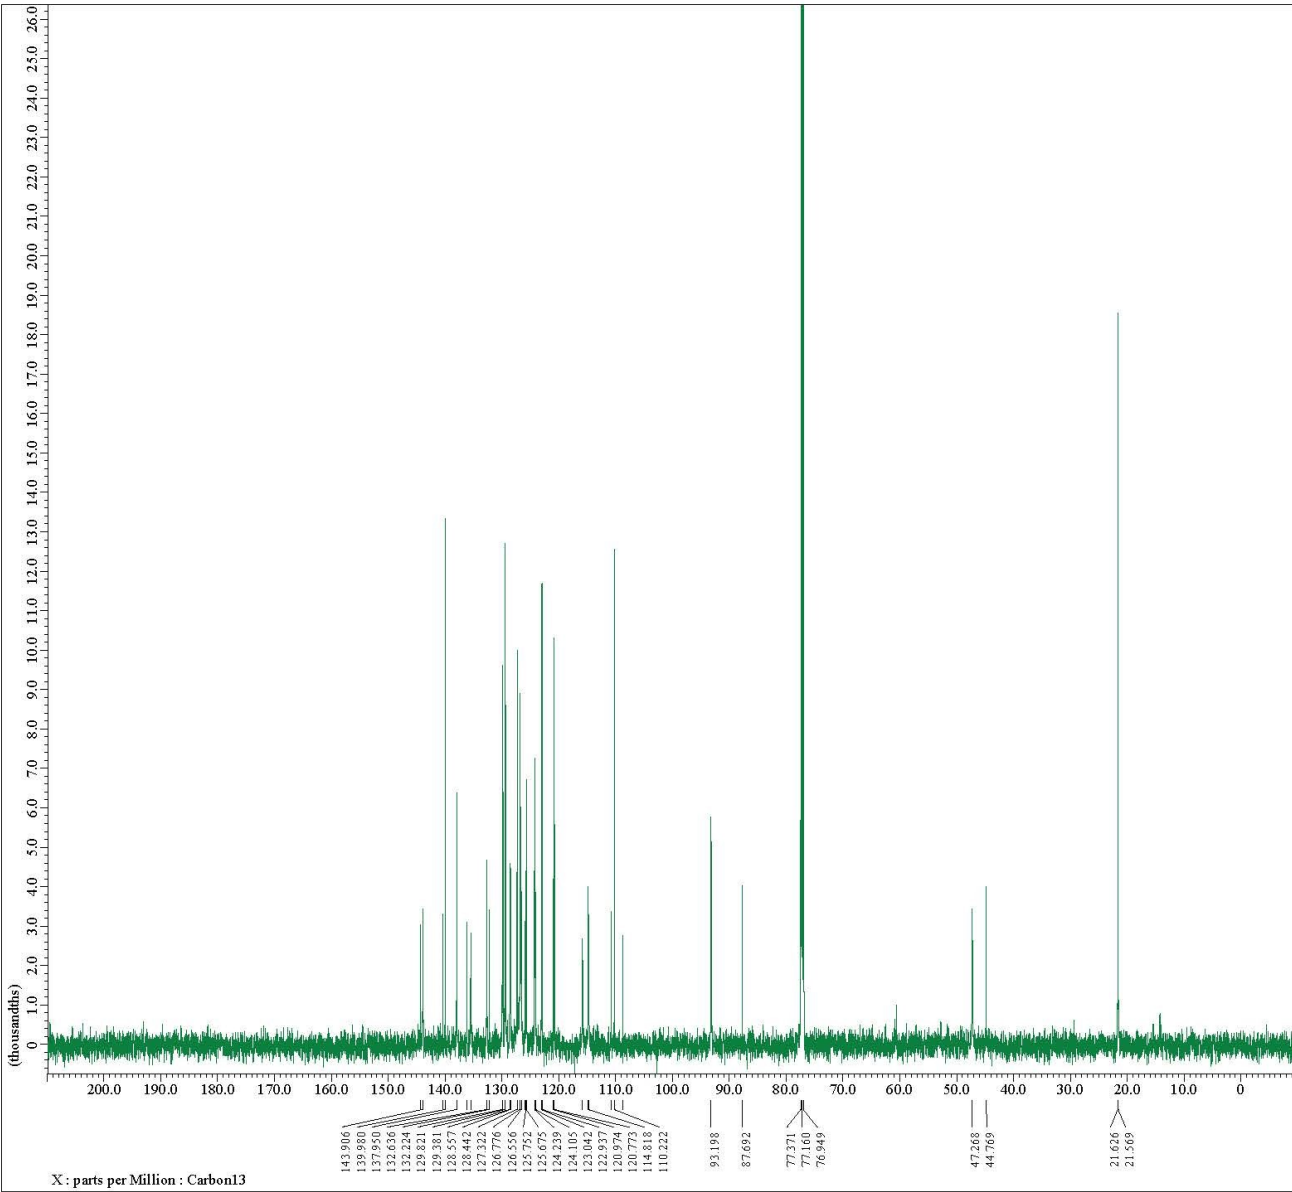

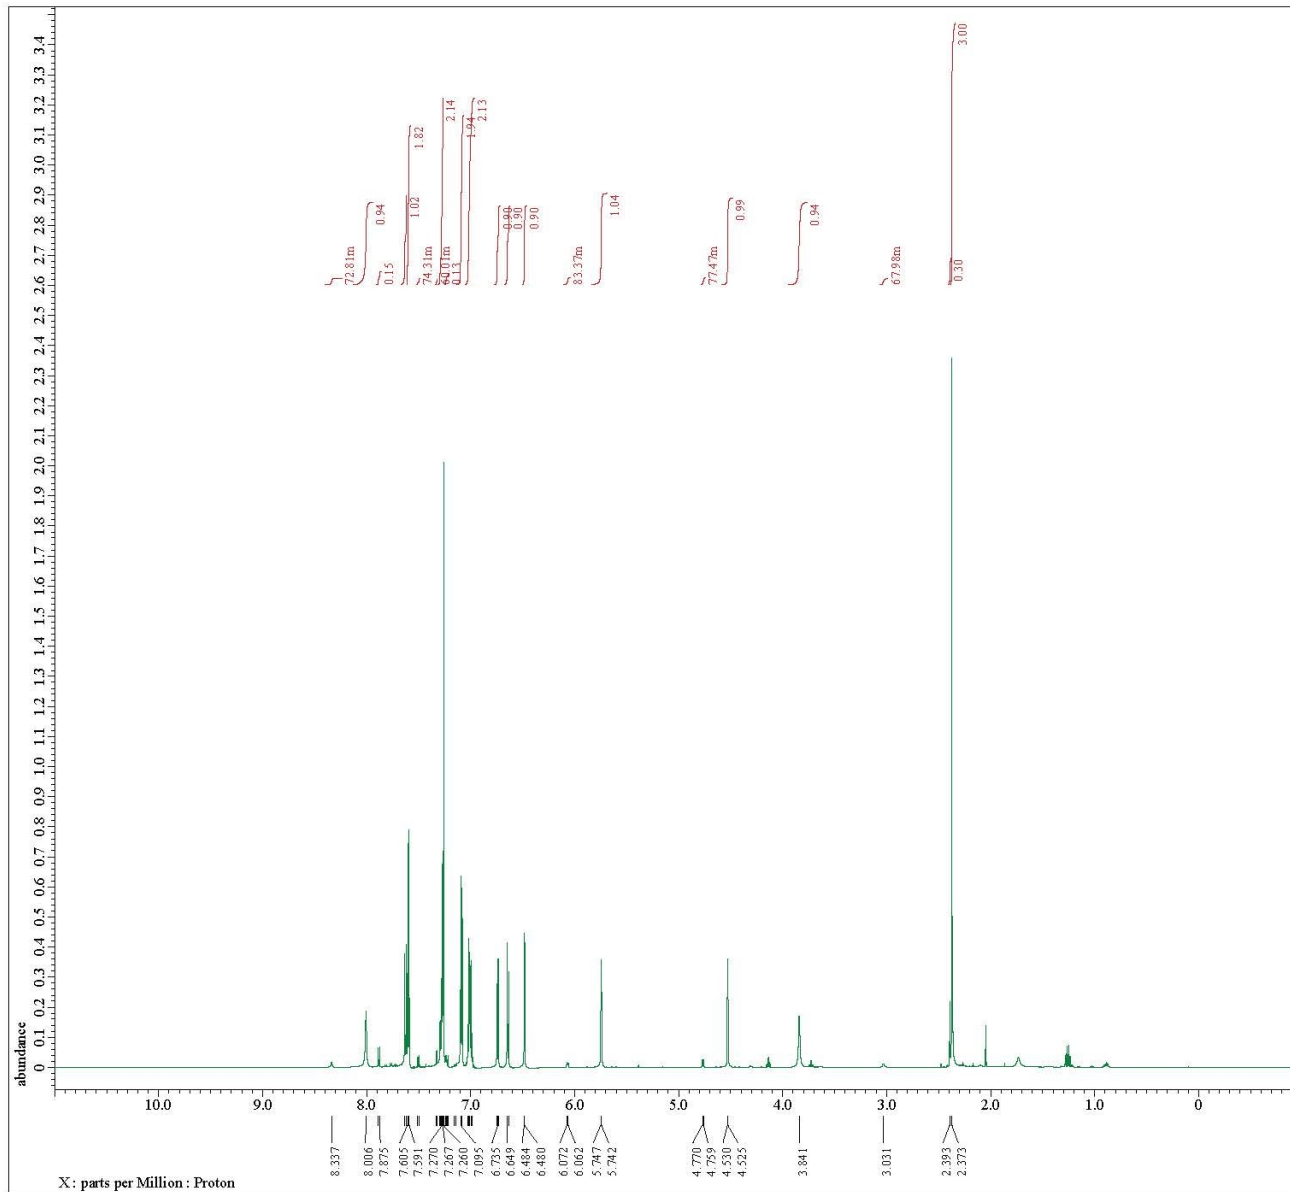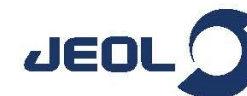

```

---- PROCESSING PARAMETERS ----
sexp( 0.2[Hz], 0.0[s] )
trapezoid( 0[Hz], 0[Hz], 80[Hz], 100[Hz] )
sziroll( 1, TRUE )
fft( 1, TRUE, TRUE )
machinephase
ppm
base_correct( Akima, 5, 0, FALSE, 3, None, FALSE )

```

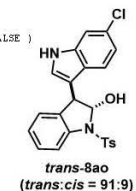

```

Filename      = TK-6-300-2_proton-2-3.jdr
Author       = delta
Experiment   = proton.jxp
Sample_id    = TK-6-300-2
Solvent      = CHLOROFORM-D
Actual_Start_Time = 3-AUG-2024 12:42:18
Revision_Time   = 5-AUG-2024 11:44:15

Data_Format   = 1D REAL
Dim_Size      = 26214
X_Domain      = Proton
Dim_Title     = Proton
Dim_Units     = [ppm]
Dimensions    = X
Spectrometer  = JNM-ECP600R/S3

Field_Strength = 14.09636928[T] (600[MHz])
X_AcqDuration  = 2.91110912[s]
X_Domain       = Proton
X_Freq         = 600.1723046[MHz]
X_Offset       = 5[ppm]
X_Points       = 32768
X_Prescans     = 1
X_Resolution   = 0.34351169[Hz]
X_Sweep        = 11.2561909[MHz]
X_Sweep_Clippped = 9.00495272[MHz]
Irr_Domain    = Proton
Irr_Freq      = 600.1723046[MHz]
Irr_Offset    = 5[ppm]
Irr_Domain    = Proton
Tri_Freq      = 600.1723046[MHz]
Tri_Offset    = 5[ppm]
Blanking     = 5.0[Hz]
Clipped       = FALSE
Scans        = 4
Total_Scans   = 4

Relaxation_Delay = 2[s]
Recvr_Gain       = 36
Temp_Set         = 45[degC]
X_50_Width      = 9.9[us]
X_Acq_Time       = 2.91110912[s]
X_Angle          = 45[deg]
X_Attn           = 8.1[dB]
X_Pulse          = 4.95[us]
Irr_Mode        = Off
Tri_Mode        = Off
Dante_Loop      = 200
Dante_Preset    = FALSE
Derivation_Rate = 0
Initial_Wait    = 1[s]
Phase           = [0, 90, 270, 180, 270, 90, 0]
Preset_Time     = 2[s]
Preset_Time_Flag = FALSE
Relaxation_Delay_Calc = 0[s]
Relaxation_Delay_Temp = 2[s]
Repetition_Time = 4.91110912[s]

```

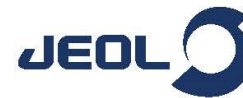

---- PROCESSING PARAMETERS ----  
blip\_cld(16, 64, 1)  
sexp(2.0[Hz], 0.0[s])  
fft(1, TRUE, TRUE)  
machinephase  
ppm

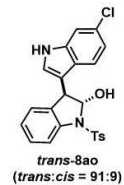

Filename = TK-6-122-2-5\_carbon-1-2.jdf  
Author = delta  
Experiment = carbon.jxp  
Sample\_Id = TK-6-122-2-5  
Solvent = CHLOROFORM-D  
Actual\_Start\_Time = 25-JUN-2024 22:23:04  
Revision\_Time = 25-JUN-2024 22:21:24

Data\_Format = 1D\_COMPLEX  
Dim\_Size = 26214  
X\_Domain = Carbon13  
Dim\_Title = Carbon13  
Dim\_Units = [ppm]  
Dim\_Dimensions = X  
Spectrometer = JNM-EC2600R/S3

Field\_Strength = 14.09636928[T] (600[MHz])  
X\_Acq\_Duration = 0.69206016[s]  
X\_Domain = Carbon13  
X\_Freq = 150.91343039[MHz]  
X\_Offset = 100[ppm]  
X\_Points = 32768  
X\_Prescans = 1  
X\_Resolution = 1.44496109[Hz]  
X\_Sweep = 47.34948485[kHz]  
X\_Sweep\_Clippped = 37.87878788[kHz]  
Irr\_Domain = Proton  
Irr\_Freq = 600.1723046[MHz]  
Irr\_Offset = 5[ppm]  
Blanking = 15.0[us]  
Clipped = FALSE  
Scans = 38  
Total\_Scans = 38

Relaxation\_Delay = 1[s]  
Recv\_Gain = 56  
Temp\_Get = 21.8[dC]  
X\_90\_Width = 8.1[us]  
X\_Acq\_Time = 0.69206016[s]  
X\_Angle = 30[deg]  
X\_Atn = 1[dB]  
X\_Pulse = 2.7[us]  
Irr\_Atn\_Dec = 25.803[dB]  
Irr\_Atn\_Dec\_Calc = 25.803[dB]  
Irr\_Atn\_Dec\_Default\_Calc = 25.803[dB]  
Irr\_Dec\_Bandwidth\_Hz = 7.23684211[kHz]  
Irr\_Dec\_Bandwidth\_Ppm = 12.05794078[ppm]  
Irr\_Dec\_Freq = 600.1723046[MHz]  
Irr\_Dec\_Merit\_Factor = 2.2  
Irr\_Decoupling = TRUE  
Irr\_Noise = FALSE  
Irr\_Noise = WALTZ  
Irr\_Offset\_Default = 5[ppm]  
Irr\_Pwidth = 76[us]  
Irr\_Pwidth\_Default = 76[us]  
Irr\_Pwidth\_Default\_Calc = 76[us]  
Irr\_Pwidth\_Temp1 = 76[us]  
Irr\_Wurst = FALSE  
Decimation\_Rate = 0  
Initial\_Wait = 1[s]  
Noe\_Time = 1[s]  
Noe\_Time\_Flag = FALSE  
Relaxation\_Delay\_Calc = 0[s]  
Relaxation\_Delay\_Temp = 1[s]  
Repetition\_Time = 1.69206016[s]

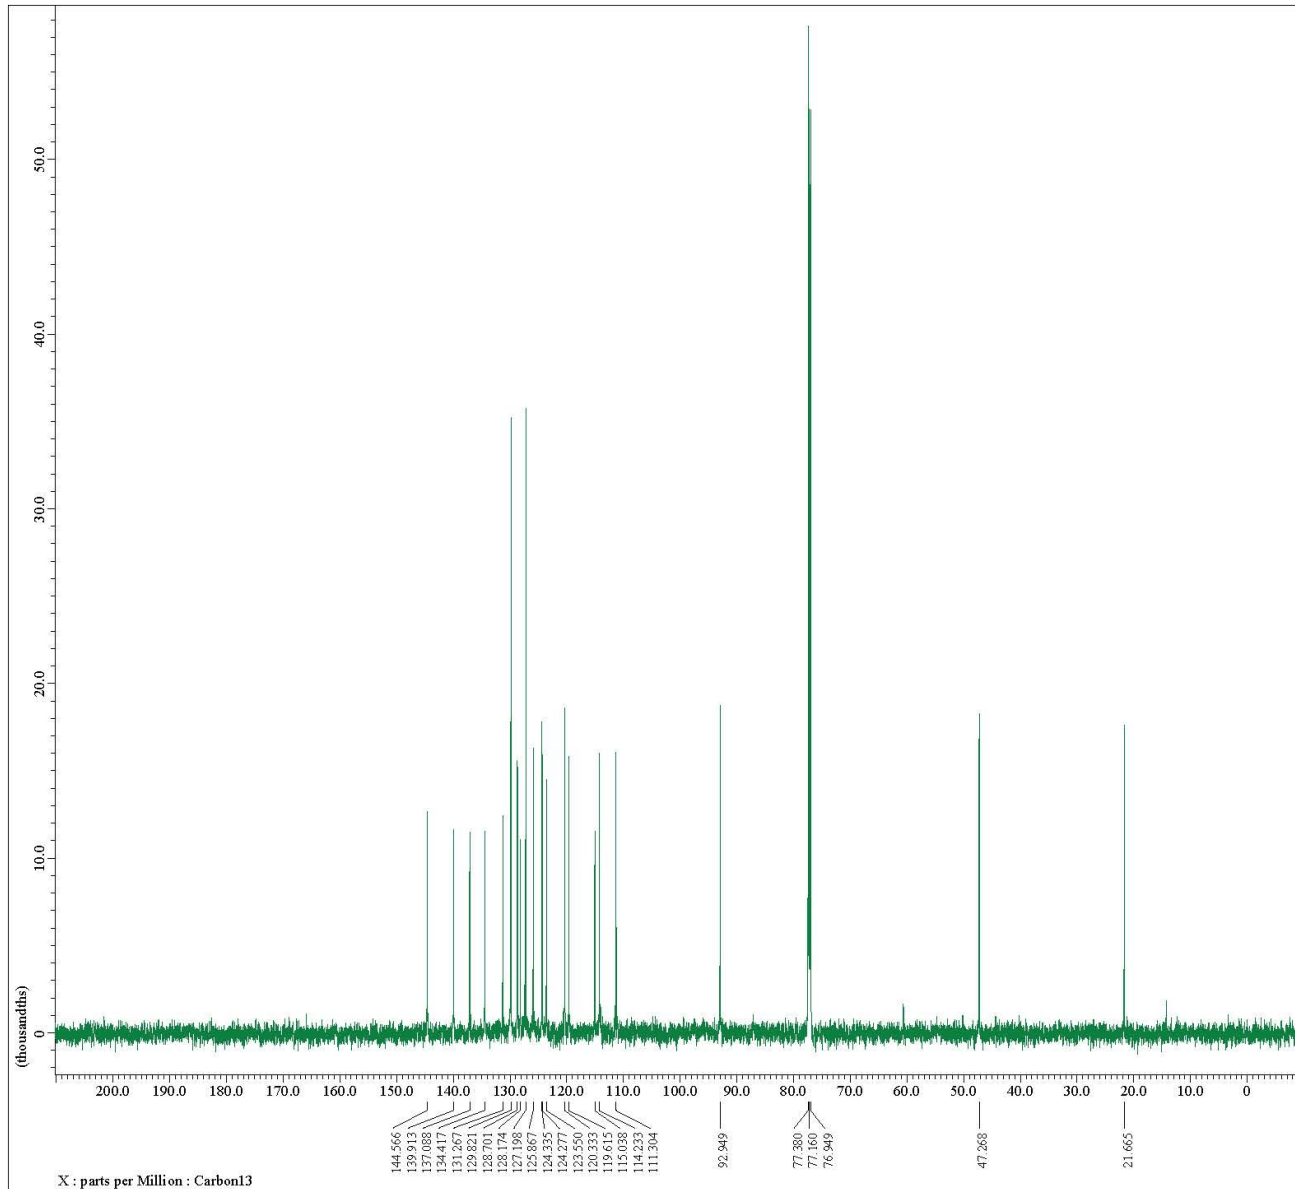

X : parts per Million : Carbon13

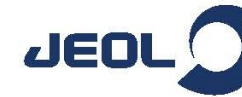

---- PROCESSING PARAMETERS ----  
sexp( 0.2[Hz], 0.0[s] )  
trapezoid( 0[k], 0[k], 80[k], 100[k] )  
zerofill( 1, TRUE )  
fft( 1, TRUE, TRUE )  
machinephase  
pfa  
base\_correct( Akima, 5, 0, FALSE, 3, None, FALSE )  
reference( 7.23946[ppm], 7.26[ppm] )  
thresh( 0.36547[k], 4, 1  
以下C曲表: TK-6-122-3-10\_proton-2-1.jdf

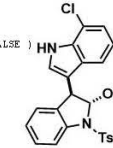

trans-8ap  
(trans:cis = 94:6)

Filename = TK-6-122-3-10\_proton-2-3.jdf  
Author = delta  
Experiment = proton.jxp  
Sample\_id = TK-6-122-3-10  
Solvent = CHLOROFORM-D  
Actual\_Start\_Time = 1-JUL-2024 13:44:42  
Revision\_Time = 5-AUG-2024 11:52:11  
Data\_Format = 1D REAL  
Dim\_Size = 26214  
X\_Domain = Proton  
Dim\_Title = Proton  
Dim\_Units = [ppm]  
Dimensions = X  
Spectrometer = JNM-EZ600R/S3  
Field\_Strength = 14.09636928[T] (600[MHz])  
X\_Acq\_Duration = 2.18365952[s]  
X\_Domain = Proton  
X\_Freq = 600.1723046[MHz]  
X\_Offset = 5[ppm]  
X\_Points = 32768  
X\_Prescans = 1  
X\_Resolution = 0.45794665[Hz]  
X\_Sweep = 15.0060024[MHz]  
X\_Sweep\_Clippped = 12.00480192[MHz]  
Irr\_Domain = Proton  
Irr\_Freq = 600.1723046[MHz]  
Irr\_Offset = 5[ppm]  
Tri\_Domain = Proton  
Tri\_Freq = 600.1723046[MHz]  
Tri\_Offset = 5[ppm]  
Blanking = 5.0[usec]  
Clipped = FALSE  
Scans = 4  
Total\_Scans = 4  
Relaxation\_Delay = 2[s]  
Recv\_Gain = 36  
Temp\_Gct = 21[degC]  
X\_50\_Width = 9.9[usec]  
X\_Acq\_Time = 2.18365952[s]  
X\_Angle = 45[deg]  
X\_Atn = 8.1[dB]  
X\_Pulse = 4.95[usec]  
Irr\_Mode = Off  
Tri\_Mode = Off  
Dante\_Loop = 200  
Dante\_Preset = FALSE  
Decimation\_Rate = 0  
Initial\_Wait = 1[s]  
Phase = (0, 90, 270, 180, 180, 270, 90, 0)  
Preset\_Time = 2[s]  
Preset\_Time\_Flag = FALSE  
Relaxation\_Delay\_Calc = 0[s]  
Relaxation\_Delay\_Temp = 2[s]  
Repetition\_Time = 4.18365952[s]

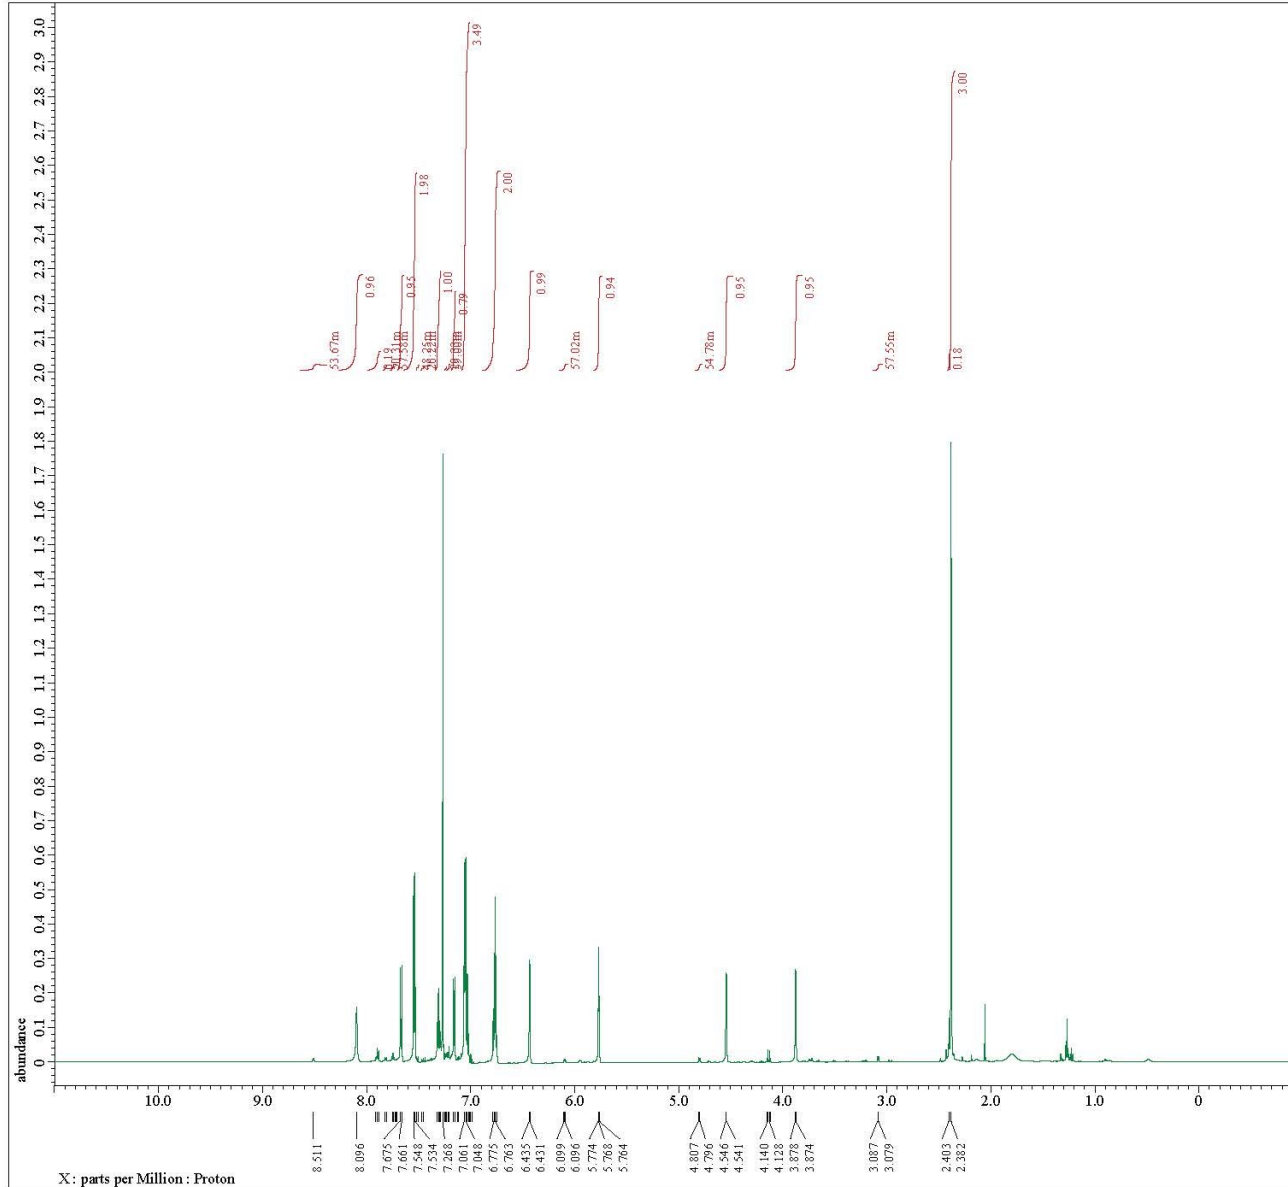

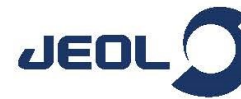

---- PROCESSING PARAMETERS ----  
blip\_cid( 16, 64, 1 )  
sexp( 2.0[Hz], 0.0[s] )  
ifc( 1, TRUE, TRUE )  
machinephase  
ppm

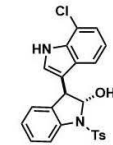

**trans-8ap**  
(trans:cis = 94:6)

Filename = TK-6-122-3-10\_carbon-2-2.jdf  
Author = delta  
Experiment = carbon.jxp  
Sample\_Id = TK-6-122-3-10  
Solvent = CHLOROFORM-D  
Actual\_Start\_Time = 1-JUL-2024 19:45:29  
Revision\_Time = 1-JUL-2024 19:44:55

Data\_Format = 1D\_COMPLEX  
Dim\_Size = 26214  
X\_Domain = Carbon13  
Dim\_Title = Carbon13  
Dim\_Units = [ppm]  
Dimensions = X  
Spectrometer = JNM-EC2600R/S3

Field\_Strength = 14.09636928[T] (600[MHz])  
X\_Acq\_Duration = 0.6920616[s]  
X\_Domain = Carbon13  
X\_Freq = 150.9134309[MHz]  
X\_Offset = 100[ppm]  
X\_Points = 32788  
X\_Prescans = 1  
X\_Resolution = 1.44496109[Hz]  
X\_Sweep = 47.34848485[kHz]  
X\_Sweep\_Clipped = 37.87878788[kHz]  
Irr\_Domain = Proton  
Irr\_Freq = 600.1723046[MHz]  
Irr\_Offset = 5[ppm]  
Blanking = 15.0[us]  
Clipped = FALSE  
Scans = 64  
Total\_Scans = 64

Relaxation\_Delay = 1[s]  
Recv\_Gain = 56  
Temp\_Get = 21[dC]  
X\_90\_Width = 8.1[us]  
X\_Acq\_Time = 0.6920616[s]  
X\_Angle = 30[deg]  
X\_Atn = 1[dB]  
X\_Pulse = 2.7[us]  
Irr\_Atn\_Dec = 25.803[dB]  
Irr\_Atn\_Dec\_Calc = 25.803[dB]  
Irr\_Atn\_Dec\_Default\_Calc = 25.803[dB]  
Irr\_Dec\_Bandwidth\_Hz = 7.23684211[kHz]  
Irr\_Dec\_Bandwidth\_Ppm = 12.05794078[ppm]  
Irr\_Dec\_Freq = 600.1723046[MHz]  
Irr\_Dec\_Merit\_Factor = 2.2  
Irr\_Decoupling = TRUE  
Irr\_Noise = FALSE  
Irr\_Noise = WALTZ  
Irr\_Offset\_Default = 5[ppm]  
Irr\_Pwidth = 76[us]  
Irr\_Pwidth\_Default = 76[us]  
Irr\_Pwidth\_Default\_Calc = 76[us]  
Irr\_Pwidth\_Temp1 = 76[us]  
Irr\_Wurst = FALSE  
Decimation\_Rate = 0  
Initial\_Wait = 1[s]  
Noe\_Time = 1[s]  
Noe\_Time\_Flag = FALSE  
Relaxation\_Delay\_Calc = 0[s]  
Relaxation\_Delay\_Temp = 1[s]  
Repetition\_Time = 1.69206016[s]

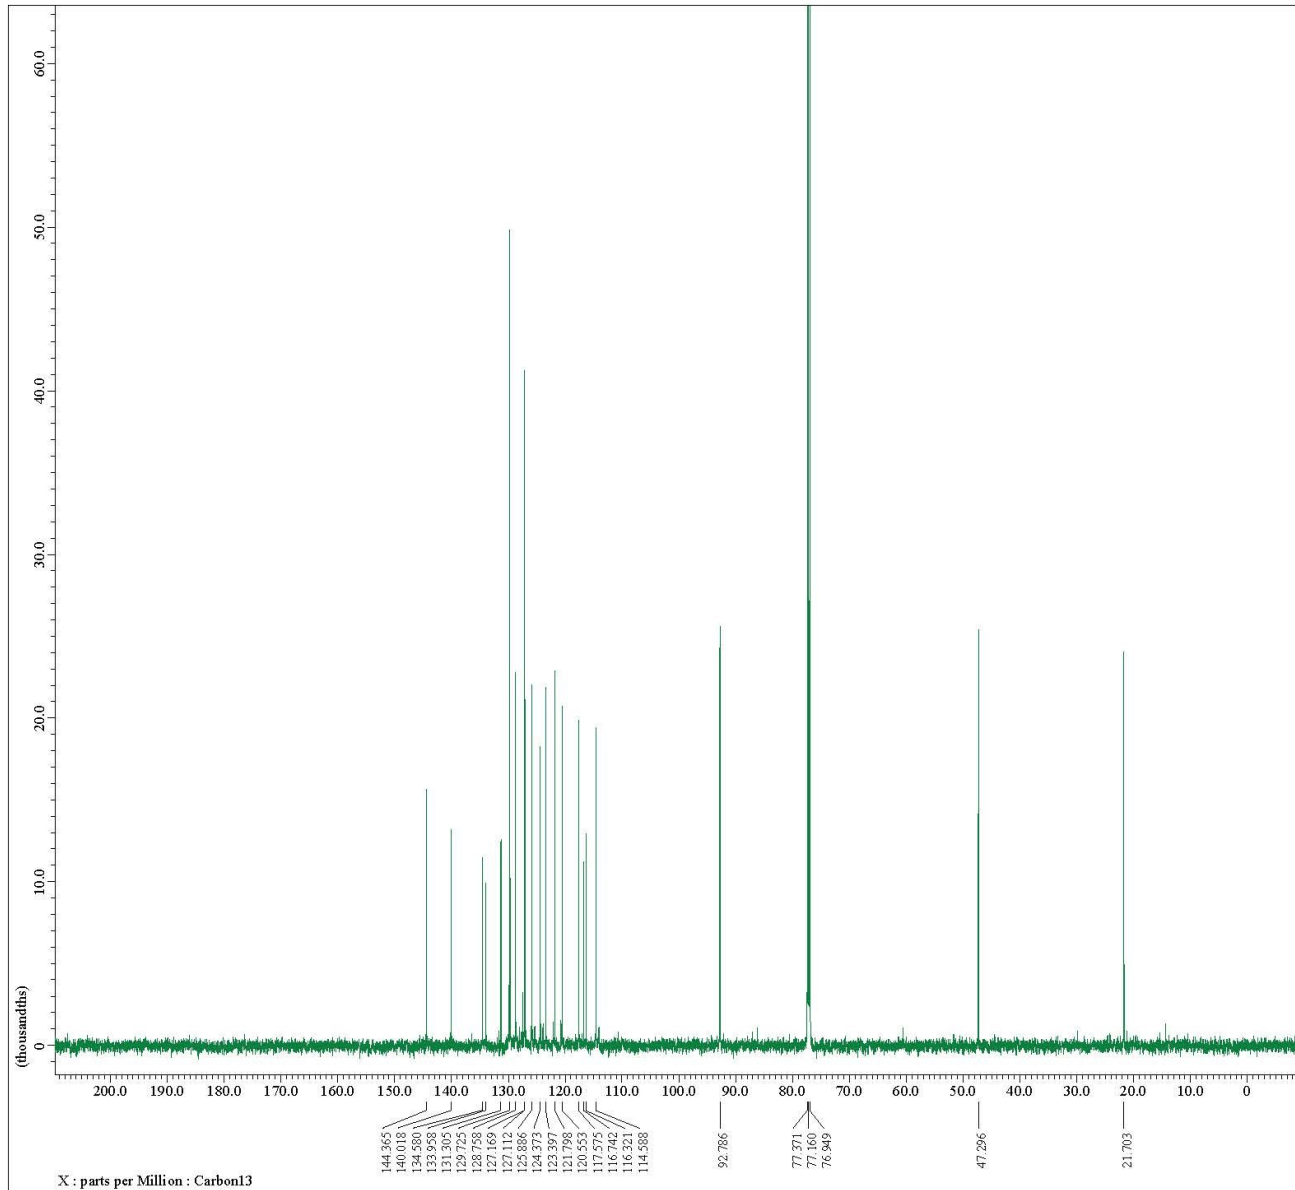

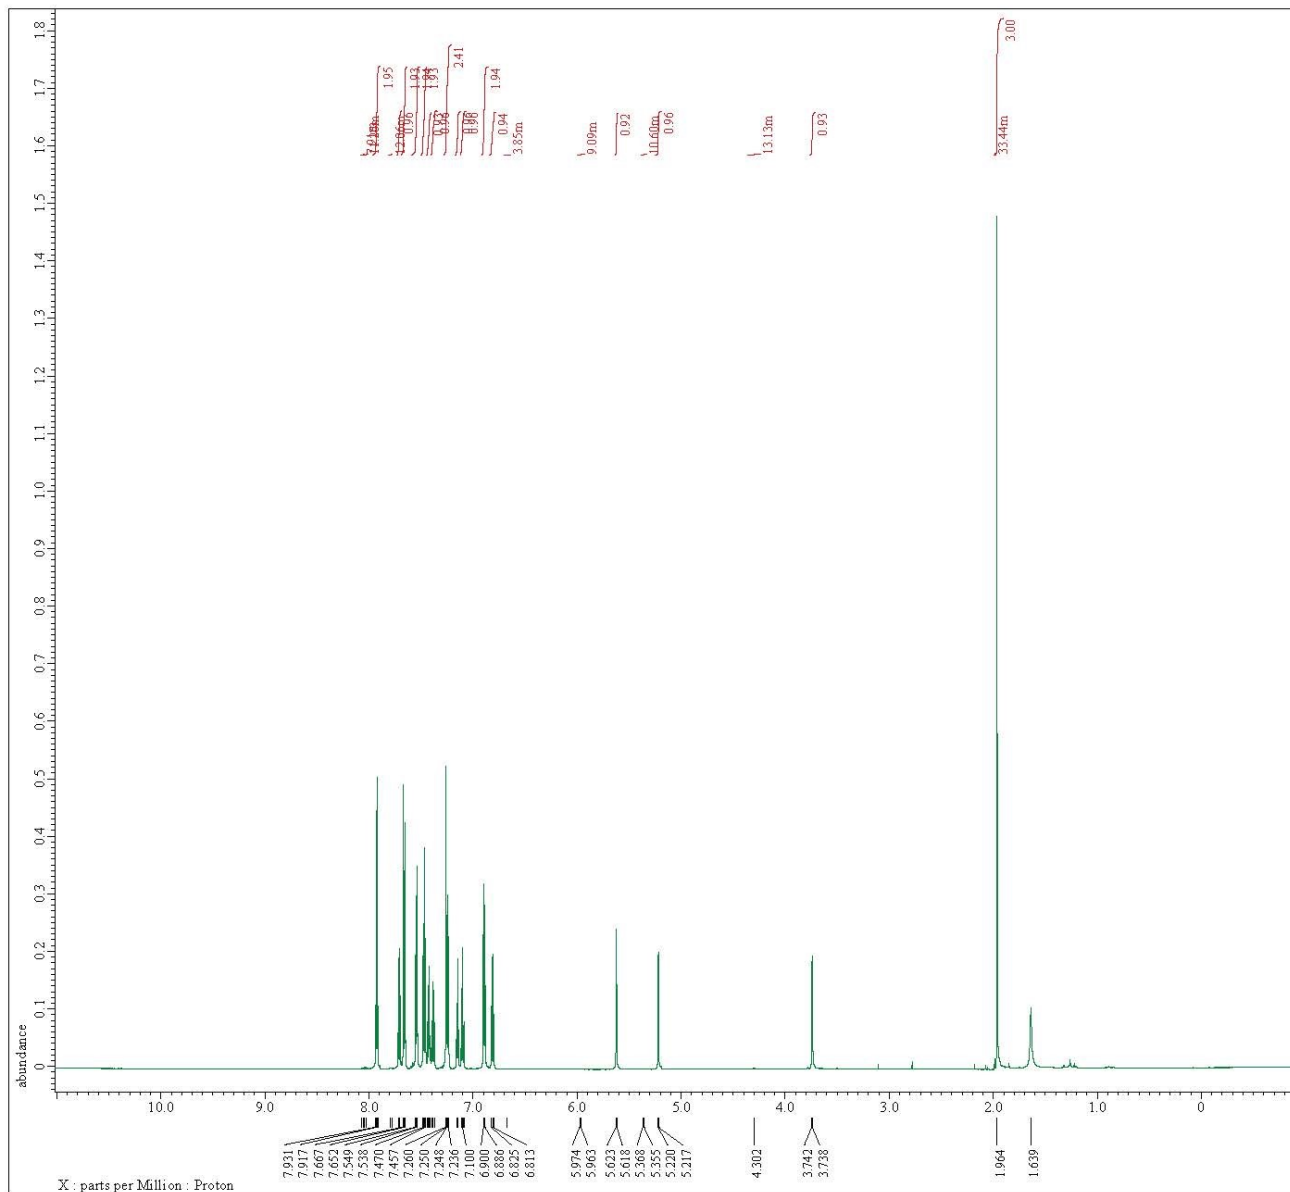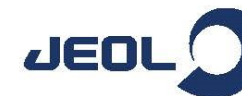

```

---- PROCESSING PARAMETERS ----
sexp( 0.2[Hz], 0.0[s] )
trapezoid( 0[%], 0[%], 80[%], 100[%] )
zerofill( 1, TRUE )
fft( 1, TRUE, TRUE )
machinephase
ppm
reference( 7.24864[ppm], 7.26[ppm] )
thresh( 3.26468[%], 1, )
  
```

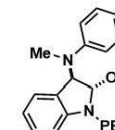

**trans-8la**  
(*trans:cis* = 99:1)

```

Filename      = KV-1-069-6_proton-1-3.jdf
Author       = delta
Experiment   = proton.jxp
Sample_id    = KV-1-069-6
Solvent      = CHLOROFORM-D
Actual_Start_Time = 20-JUN-2024 22:48:42
Revision_Time   = 5-AUG-2024 12:35:00

Data_Format  = 1D COMPLEX
Dia_Size     = 26214
X_Domain     = Proton
Dia_Title    = Proton
Dia_Units    = [ppm]
Dimensions   = X
Spectrometer = JNM-EZ600R/S3

Field_Strength = 14.09636928[T] (600[MHz])
X_Acq_Duration = 2.19365952[s]
X_Domain       = Proton
X_Freq         = 600.1723046[MHz]
X_Offset       = 5[ppm]
X_Points       = 32758
X_Prescans     = 1
X_Resolution   = 0.45794605[Hz]
X_Sweep        = 15.0060024[kHz]
X_Sweep_Clippped = 12.00480192[kHz]
Irr_Domain     = Proton
Irr_Freq       = 600.1723046[MHz]
Irr_Offset     = 5[ppm]
Tri_Domain     = Proton
Tri_Freq       = 600.1723046[MHz]
Tri_Offset     = 5[ppm]
Blanking       = 5.0[us]
Clipped        = FALSE
Scans          = 4
Total_Scans    = 4

Relaxation_Delay = 2[s]
Recvr_Gain       = 36
Temp_Set        = 21[4C]
X_90_Width      = 9.9[us]
X_Acq_Time      = 2.19365952[s]
X_Angle         = 45[deg]
X_Alt           = 8.1[dB]
X_Pulse         = 4.35[us]
Irr_Mode        = Off
Tri_Mode        = Off
Dante_Loop      = 200
Dante_Preset    = FALSE
Decimation_Rate = 0
Initial_Wait    = 1[s]
Phase           = (0, 90, 270, 180, 180, 270, 90, 0)
Preset_Time     = 21[s]
Preset_Time_Play = FALSE
Relaxation_Delay_Calc = 0[s]
Relaxation_Delay_Temp = 2[s]
Repetition_Time = 4.18365952[s]
  
```



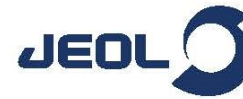

---- PROCESSING PARAMETERS ----  
blip\_cld( 16, 64, 1 )  
secp( 2.0[Hz], 0.0[s] )  
fft( 1, TRUE, TRUE )  
machinephase  
ppa

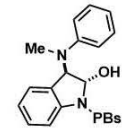

Filename = KY-1-069-6\_carbon-1-3.jdf  
Author = delta  
Experiment = carbon.jxp  
Sample\_Id = KY-1-069-6  
Solvent = CHLOROFORM-D  
Actual\_Start\_Time = 20-JUN-2024 22:50:44  
Revision\_Time = 21-JUN-2024 07:55:18

Data\_Format = 1D\_COMPLEX  
Dia\_Size = 26214  
X\_Domain = Carbon13  
Dia\_Title = Carbon13  
Dia\_Units = [ppm]  
Dimensions = X  
Spectrometer = JNM-ECZ600R/S3

Field\_Strength = 14.09636928[T] (600[MHz])  
X\_Acq\_Duration = 0.69206016[s]  
X\_Domain = Carbon13  
X\_Freq = 150.91343039[MHz]  
X\_Offset = 100[ppm]  
X\_Points = 32768  
X\_Prescans = 1  
X\_Resolution = 1.44496109[Hz]  
X\_Sweep = 47.34648485[kHz]  
X\_Sweep\_Clipped = 37.87878788[kHz]  
Irr\_Domain = proton  
Irr\_Freq = 600.1723046[MHz]  
Irr\_Offset = 5[ppm]  
Blanking = 15.0[us]  
Clipped = FALSE  
Scans = 37  
Total\_Scans = 37

Relaxation\_Delay = 1[s]  
Recv\_Gain = 38  
Temp\_Set = 21[degC]  
X\_SQ\_Width = 8.1[us]  
X\_Acq\_Time = 0.69206016[s]  
X\_Angle = 30[deg]  
X\_Atn = 11[db]  
X\_Pulse = 2.7[us]  
Irr\_Atn\_Dec = 25.803[db]  
Irr\_Atn\_Dec\_Calc = 25.803[db]  
Irr\_Atn\_Dec\_Default\_Calc = 25.803[db]  
Irr\_Atn\_Msc = 25.803[db]  
Irr\_Dec\_Bandwidth\_Hz = 7.23684211[kHz]  
Irr\_Dec\_Bandwidth\_Ppm = 12.05794078[ppm]  
Irr\_Dec\_Freq = 600.1723046[MHz]  
Irr\_Dec\_Magic\_Factor = 2.2  
Irr\_Decoupling = TRUE  
Irr\_Noise = TRUE  
Irr\_Offset\_Default = 5[ppm]  
Irr\_Pwdch = 76[us]  
Irr\_Pwdch\_Default = 76[us]  
Irr\_Pwdch\_Default\_Calc = 76[us]  
Irr\_Pwdch\_Templ = 76[us]  
Irr\_Wurst = FALSE  
Decimation\_Rate = 0  
Initial\_Wait = 1[s]  
Noe\_Time = 1[s]  
Noe\_Time\_Flag = FALSE  
Relaxation\_Delay\_Calc = 0[s]  
Relaxation\_Delay\_Temp = 1[s]  
Repetition\_Time = 1.69206016[s]

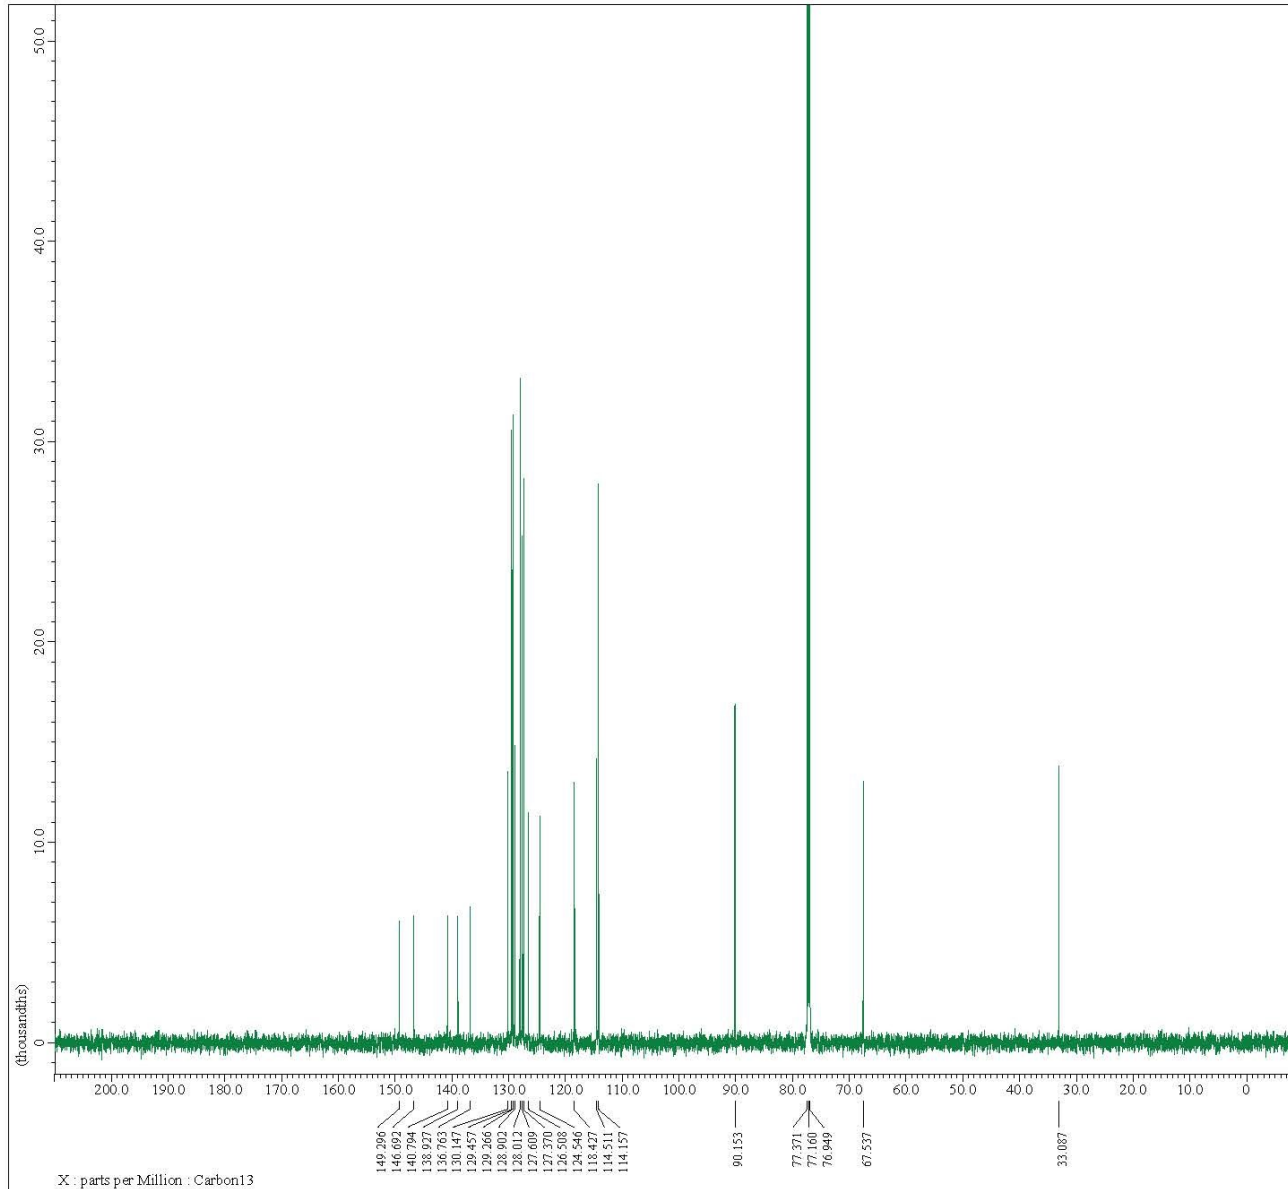

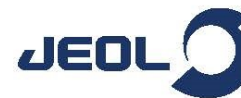

```

---- PROCESSING PARAMETERS ----
sexp( 0.2Hz, 0.0[s] )
trapasoid( 0[%], 0[%], 80[%], 100[%] )
zerofill( 1, TRUE )
ifs( 1, TRUE, TRUE )
machinephase
ppm
base correct ( Akima, 5, 0, FALSE, 3, None, FALSE )
reference ( 7.24558[ppm], 7.26[ppm] )
thresh( 0.62565[%], 1, )

```

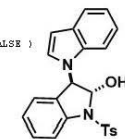

```

Filename      = TK-6-065-5 proton-1-2.jdf
Author        = delta
Experiment    = proton.jsp
Sample_Id     = TK-6-065-5
Solvent       = CHLOROFORM-D
Actual_Start_Time = 20-JUN-2024 22:18:04
Revision_Time = 5-AUG-2024 12:42:49

Data Format    = 1D REAL
Dim Size      = 32214
X_Domain      = Proton
Dim Title     = Proton
Dim Units     = [ppm]
Dimensions    = X
Spectrometer  = JNM-EZ600R/S3

Field Strength = 14.09636928[T] (600[MHz])
X_Acq Duration = 2.18365952[s]
X_Domain       = Proton
X_Freq         = 600.1723046[MHz]
X_Offset       = 5[ppm]
X_Points       = 32768
X_Prescans     = 1
X_Resolution   = 0.45794695[Hz]
X_Sweep        = 15.0050024[kHz]
X_Sweep_Clippped = 12.00480192[kHz]
Irr_Domain     = Proton
Irr_Freq       = 600.1723046[MHz]
Irr_Offset     = 5[ppm]
Tri_Domain     = Proton
Tri_Freq       = 600.1723046[MHz]
Tri_Offset     = 5[ppm]
Eliminating    = 5.0[us]
Clipped        = FALSE
Scans          = 4
Total_Scans    = 4

Relaxation_Delay = 2[s]
Recvr Gain       = 26
Temp Det         = 55[dC]
X_90 Pulse      = 9.9[us]
X_Acq Time      = 2.18365952[s]
X_Angle         = 45[deg]
X_Pwr          = 8.1[dB]
X_Pulse         = 4.95[us]
Irr_Mode        = Off
Tri_Mode        = Off
Dante Loop      = 200
Dante_Preset    = FALSE
Decimation_Rate = 0
Initial_Wait     = 1[s]
Phase           = (0, 90, 270, 180, 180, 270, 90, 0)
Preset_Time     = 2[s]
Preset_Time_Fly = FALSE
Relaxation_Delay_Calc = 0[s]
Relaxation_Delay_Temp = 2[s]
Repetition_Time = 4.18365952[s]

```

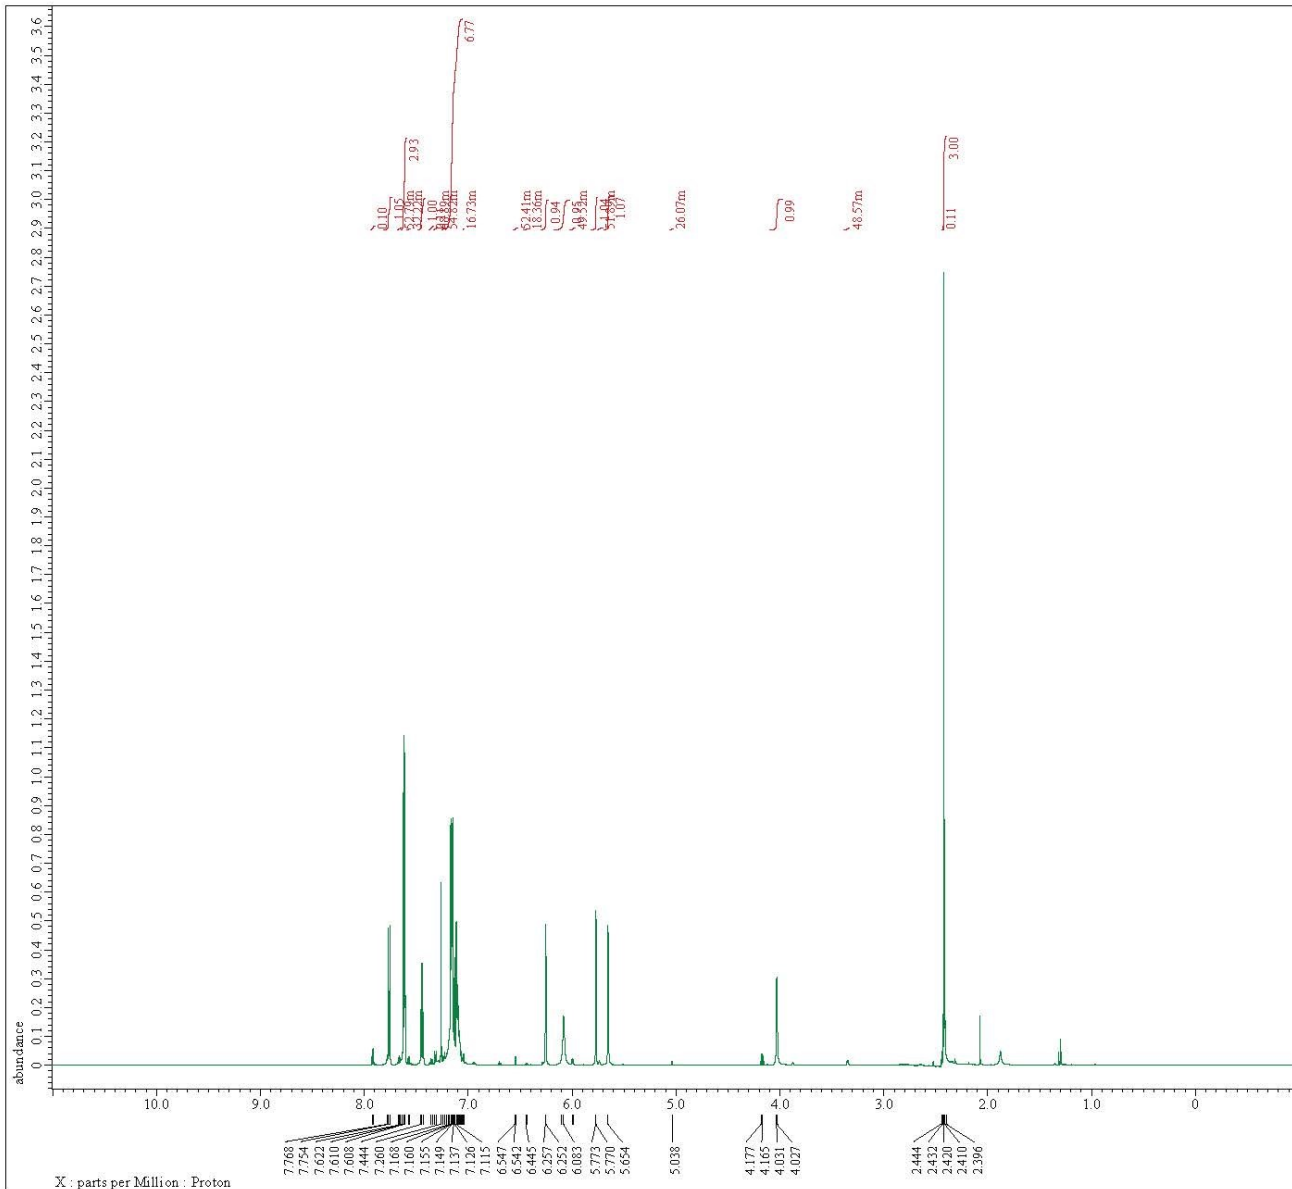

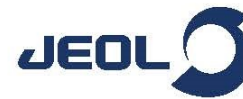

---- PROCESSING PARAMETERS ----  
blip\_cld(16, 64, 1)  
sexp( 2.0[Hz], 0.0[s] )  
fft( 1, TRUE, TRUE )  
machinephase  
ppm

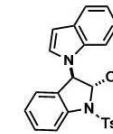

**trans-Baq**  
(trans:cis = 96:4)

Filename = TK-6-065-5\_carbon-1-3.jdf  
Author = delta  
Experiment = carbon\_jcp  
Sample\_Id = TK-6-065-5  
Solvent = CHLOROFORM-D  
Actual\_Start\_Time = 20-JUN-2024 22:20:11  
Revision\_Time = 4-JUL-2024 18:42:35

Data\_Format = 1D\_COMPLEX  
Dim\_Size = 26214  
X\_Domain = Carbon13  
Dim\_Title = Carbon13  
Dim\_Units = (ppm)  
Dimensions = X  
Spectrometer = JNM-ECZ600R/S3

Field\_Strength = 14.09636928(T) (600(MHz))  
X\_Acq\_Duration = 0.69206016(s)  
X\_Domain = Carbon13  
X\_Freq = 150.91343039(MHz)  
X\_Offset = 100(ppm)  
X\_Poins = 32788  
X\_Prescans = 1  
X\_Resolution = 1.44496109(Hz)  
X\_Sweep = 47.34848488(kHz)  
X\_Sweep\_Clipped = 37.87878788(kHz)  
X\_Domain = proton  
X\_Freq = 600.1723046(MHz)  
X\_Offset = 5(ppm)  
Blanking = 15.0(us)  
Clipped = FALSE  
Scans = 17  
Total\_Scans = 17

Relaxation\_Delay = 1(s)  
Recvr\_Gain = 56  
Temp\_Det = 55(dC)  
X\_90\_Width = 8.1(us)  
X\_Acq\_Time = 0.69206016(s)  
X\_Angle = 30(deg)  
X\_Arn = 11(dB)  
X\_Pulse = 2.7(us)  
Irr\_Atn\_Dec = 25.803(dB)  
Irr\_Atn\_Dec\_Calc = 25.803(dB)  
Irr\_Atn\_Dec\_Default\_Calc = 25.803(dB)  
Irr\_Atn\_Noise = 25.803(dB)  
Irr\_Dec\_Bandwidth\_Hz = 7.23684211(kHz)  
Irr\_Dec\_Bandwidth\_Ppm = 12.05794078(ppm)  
Irr\_Dec\_Freq = 600.1723046(MHz)  
Irr\_Dec\_Merit\_Factor = 2.2  
Irr\_Decoupling = TRUE  
Irr\_Noise = TRUE  
Irr\_Noise = WALTZ  
Irr\_Offset\_Default = 5(ppm)  
Irr\_Pwldch = 76(us)  
Irr\_Pwldch\_Default = 76(us)  
Irr\_Pwldch\_Default\_Calc = 76(us)  
Irr\_Pwldch\_Templ = 76(us)  
Irr\_Wurst = FALSE  
Decimation\_Rate = 0  
Initial\_Wait = 1(s)  
Noe\_Time = 1(s)  
Noe\_Time\_Play = FALSE  
Relaxation\_Delay\_Calc = 0(s)  
Relaxation\_Delay\_Temp = 1(s)  
Repetition\_Time = 1.69206016(s)

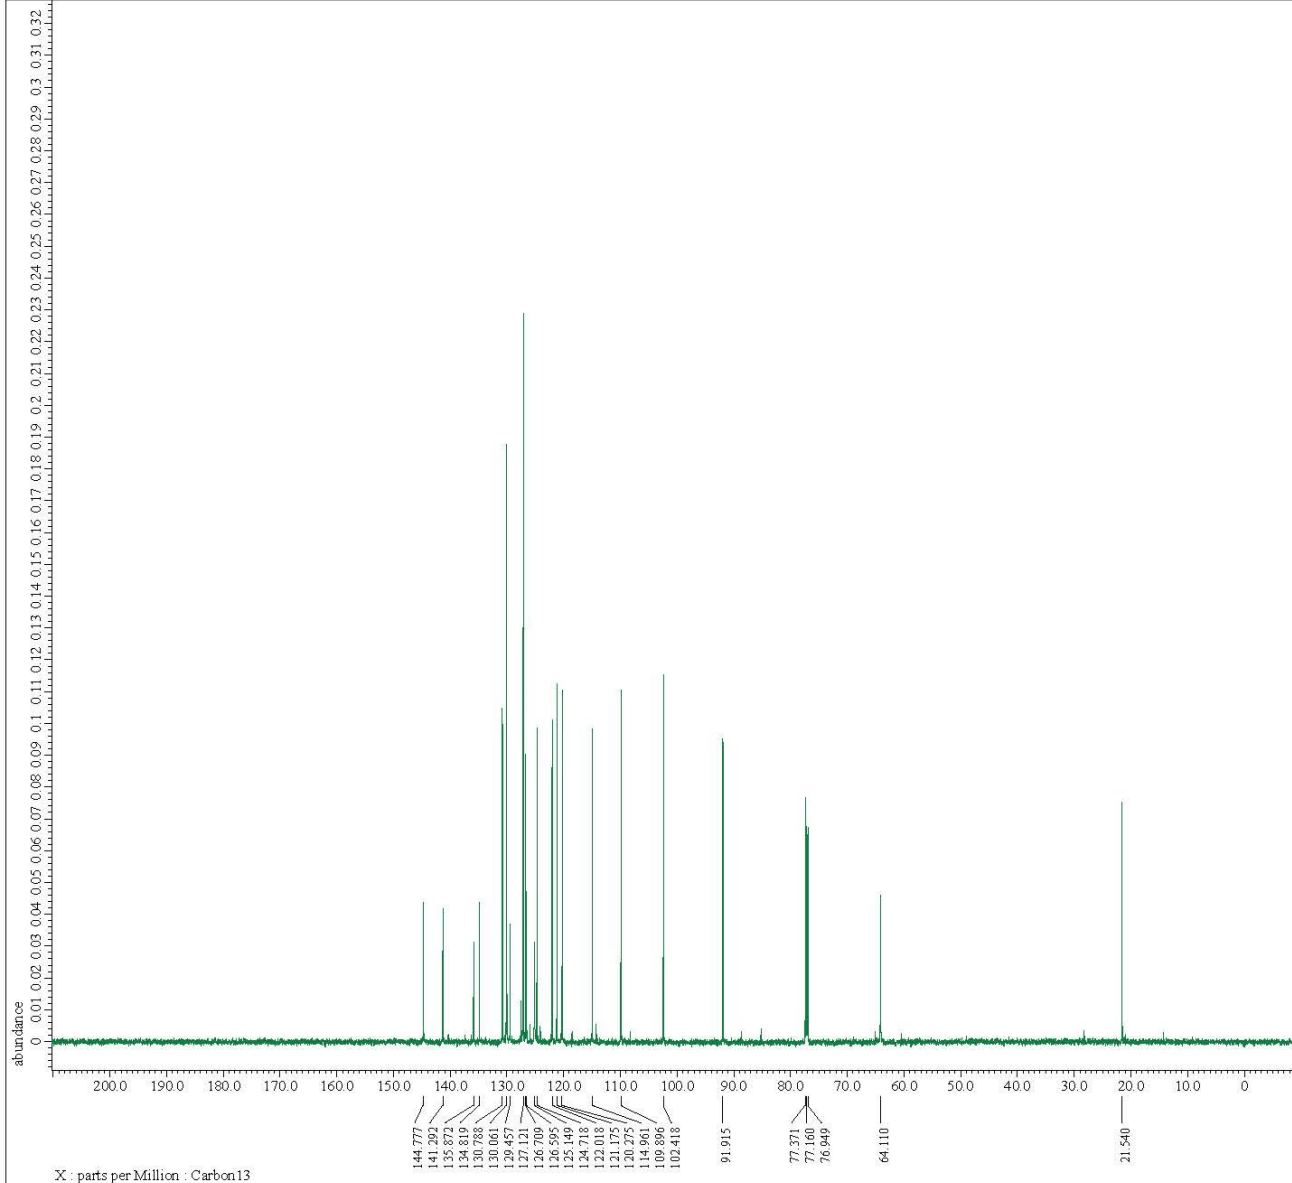

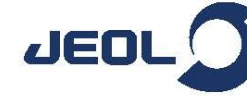

---- PROCESSING PARAMETERS ----  
sepf( 0.2[Hz], 0.0[s] )  
trapezoid( 0[Hz], 0[Hz], 80[Hz], 100[Hz] )  
zerofill( 1, TRUE )  
fft( 1, TRUE, TRUE )  
machinphase  
ppa

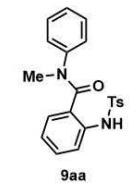

Filename = TW-6-082-10-2\_proton-2-3.jdf  
Author = delta  
Experiment = proton.jsp  
Sample\_id = TW-6-082-10-2  
Solvent = CHLOROFORM-D  
Actual\_Start\_Time = 28-JUN-2024 22:46:54  
Revision\_Time = 28-JUN-2024 00:17:10

Data Format = 1D COMPLEX  
Data Size = 26214  
X\_Domain = Proton  
Data Title = Proton  
Data Units = (ppm)  
Dimensions = X  
Spectrometer = JNM-ECZ600R/S3

Field Strength = 14.09636928[T] (600[MHz])  
X\_AcqDuration = 2.18365952[s]  
X\_Domain = Proton  
X\_Freq = 600.1723046[MHz]  
X\_Offset = 5[ppm]  
X\_Points = 32768  
X\_Prescans = 1  
X\_Resolution = 0.45794695[Hz]  
X\_Sweep = 15.0060024[KHz]  
X\_Sweep\_Clippped = 12.00480192[KHz]

Irr\_Domain = Proton  
Irr\_Freq = 600.1723046[MHz]  
Irr\_Offset = 5[ppm]  
Tri\_Domain = Proton  
Tri\_Freq = 600.1723046[MHz]  
Tri\_Offset = 5[ppm]  
Blanking = 5.0[us]  
Clipped = FALSE  
Scans = 4  
Total\_Scans = 4

Relaxation\_Delay = 2[s]  
Recvr Gain = 36  
Temp\_Set = 21.1[degC]  
X\_90Pulse = 9.9[us]  
X\_Acq Time = 2.18365952[s]  
X\_Angle = 45[deg]  
X\_Atn = 8.1[dB]  
X\_Pulse = 4.95[us]  
Irr\_Mode = Off  
Tri\_Mode = Off  
Dante\_Loop = 200  
Dante\_Preset = FALSE  
Decimation\_Rate = 0  
Initial\_Wait = 1[s]  
Phase = (0, 90, 270, 180, 180, 270, 90, 0)  
Preset\_Time = 2[s]  
Preset\_Time\_Play = FALSE  
Relaxation\_Delay\_Calc = 0[s]  
Relaxation\_Delay\_Temp = 2[s]  
Repetition\_Time = 4.18365952[s]

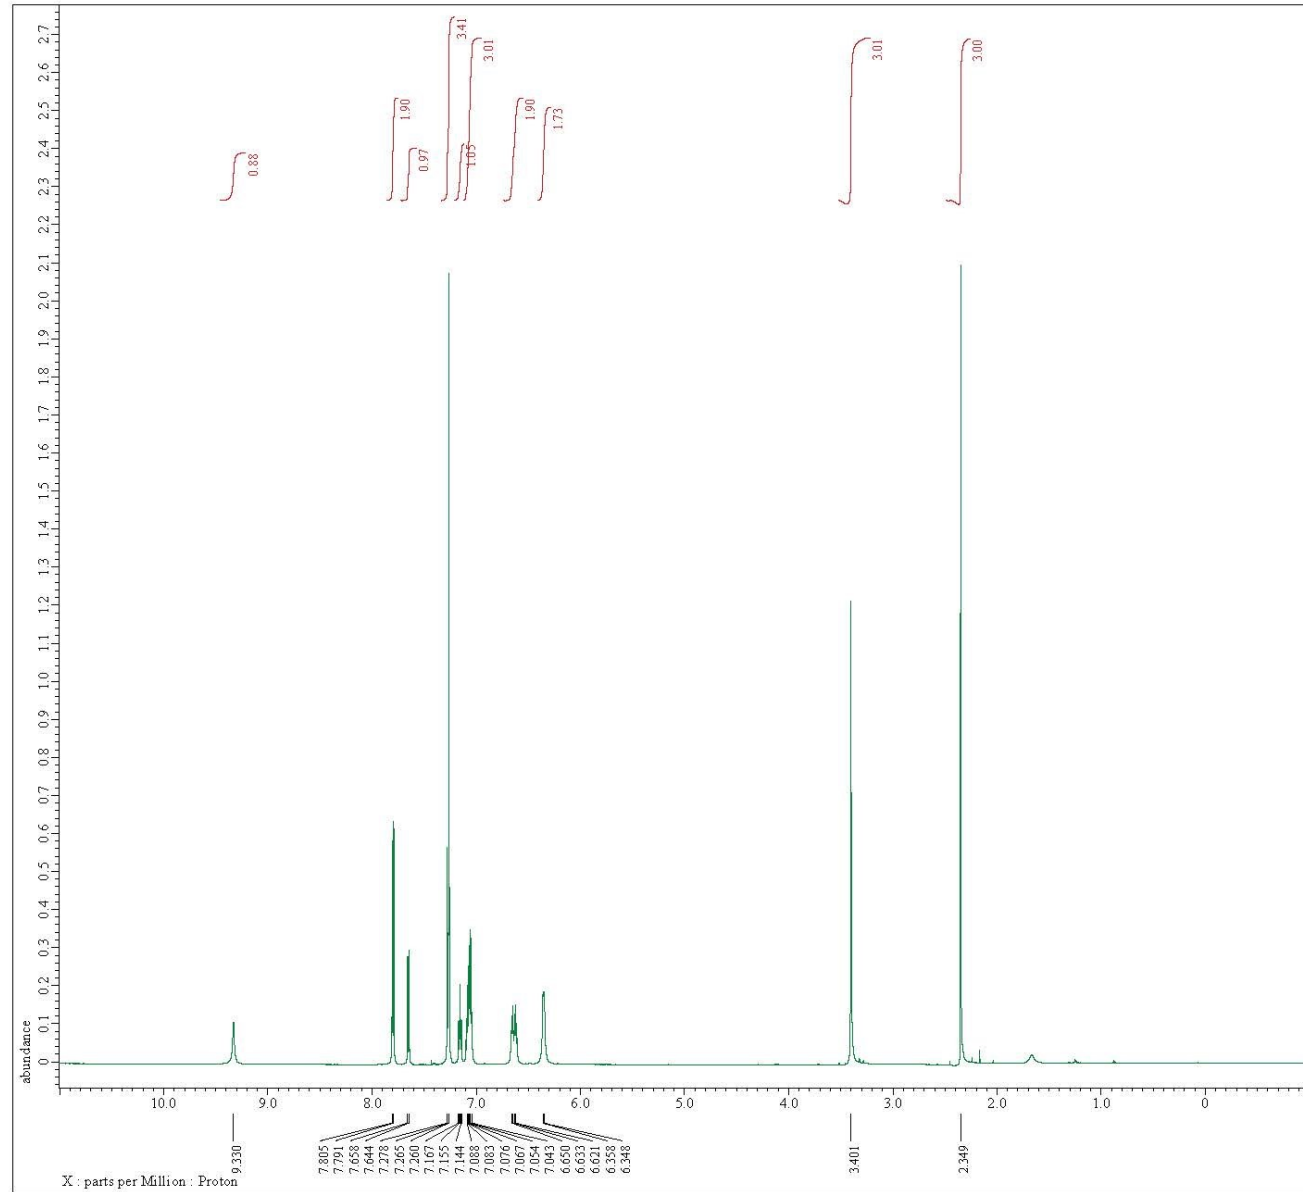

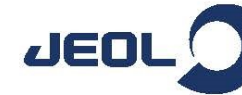

---- PROCESSING PARAMETERS ----  
blip\_cld( 16, 64, 1 )  
smp( 2.0[M], 0.0[s] )  
fft( 1, TRUE, TRUE )  
machinephase  
ppm

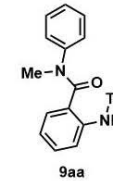

Filename = TK-6-082-10-2\_carbon-1-2.jdf  
Author = delta  
Experiment = carbon\_3vp  
Sample\_Id = TK-6-082-10-2  
Solvent = CHLOROFORM-D  
Actual\_Start\_Time = 28-JUN-2024 22:47:40  
Revision\_Time = 28-JUN-2024 23:00:21

Data Format = 1D COMPLEX  
Dim\_Size = 26214  
X\_Domain = Carbon13  
Dim\_Title = Carbon13  
Dim\_Units = [ppm]  
Dimensions = X  
Spectrometer = JNM-ECZ600R/S3

Field Strength = 14.0963628[T] (600[MHz])  
X\_Acq\_Duration = 0.69206016[s]  
X\_Domain = Carbon13  
X\_Freq = 150.91343039[MHz]  
X\_Offset = 100[ppm]  
X\_Points = 32768  
X\_Prescans = 1  
X\_Resolution = 1.44496109[Hz]  
X\_Sweep = 47.34848485[kHz]  
X\_Sweep\_Clippped = 37.87978788[kHz]  
Irr\_Domain = Proton  
Irr\_Freq = 600.1723046[MHz]  
Irr\_Offset = 5[ppm]  
Blanking = 15.0[us]  
Clipped = FALSE  
Scans = 64  
Total\_Scans = 64

Relaxation\_Delay = 1[s]  
Recvr\_Gain = 56  
Temp\_Dec = 21[degC]  
X\_90\_Width = 8.1[us]  
X\_Acq\_Time = 0.69206016[s]  
X\_Angle = 30[deg]  
X\_Arn = 11[deg]  
X\_Pulse = 2.7[us]  
Irr\_Arn\_Dec = 25.803[deg]  
Irr\_Arn\_Dec\_Calc = 25.803[deg]  
Irr\_Dec\_Bandwidth\_Hz = 7.23694211[kHz]  
Irr\_Dec\_Bandwidth\_Ppm = 12.05794078[ppm]  
Irr\_Dec\_Freq = 600.1723046[MHz]  
Irr\_Dec\_Haric\_Factor = 2.2  
Irr\_Decoupling = TRUE  
Irr\_Noise = FALSE  
Irr\_Noise = WAIT  
Irr\_Offset\_Default = 5[ppm]  
Irr\_Pwldch = 76[us]  
Irr\_Pwldch\_Default = 76[us]  
Irr\_Pwldch\_Default\_Calc = 76[us]  
Irr\_Thurst = FALSE  
Decimation\_Rate = 0  
Initial\_Wait = 1[s]  
Noe\_Time = 1[s]  
Noe\_Time\_Flag = FALSE  
Relaxation\_Delay\_Calc = 0[s]  
Relaxation\_Delay\_Temp = 1[s]  
Repetition\_Time = 1.69206016[s]

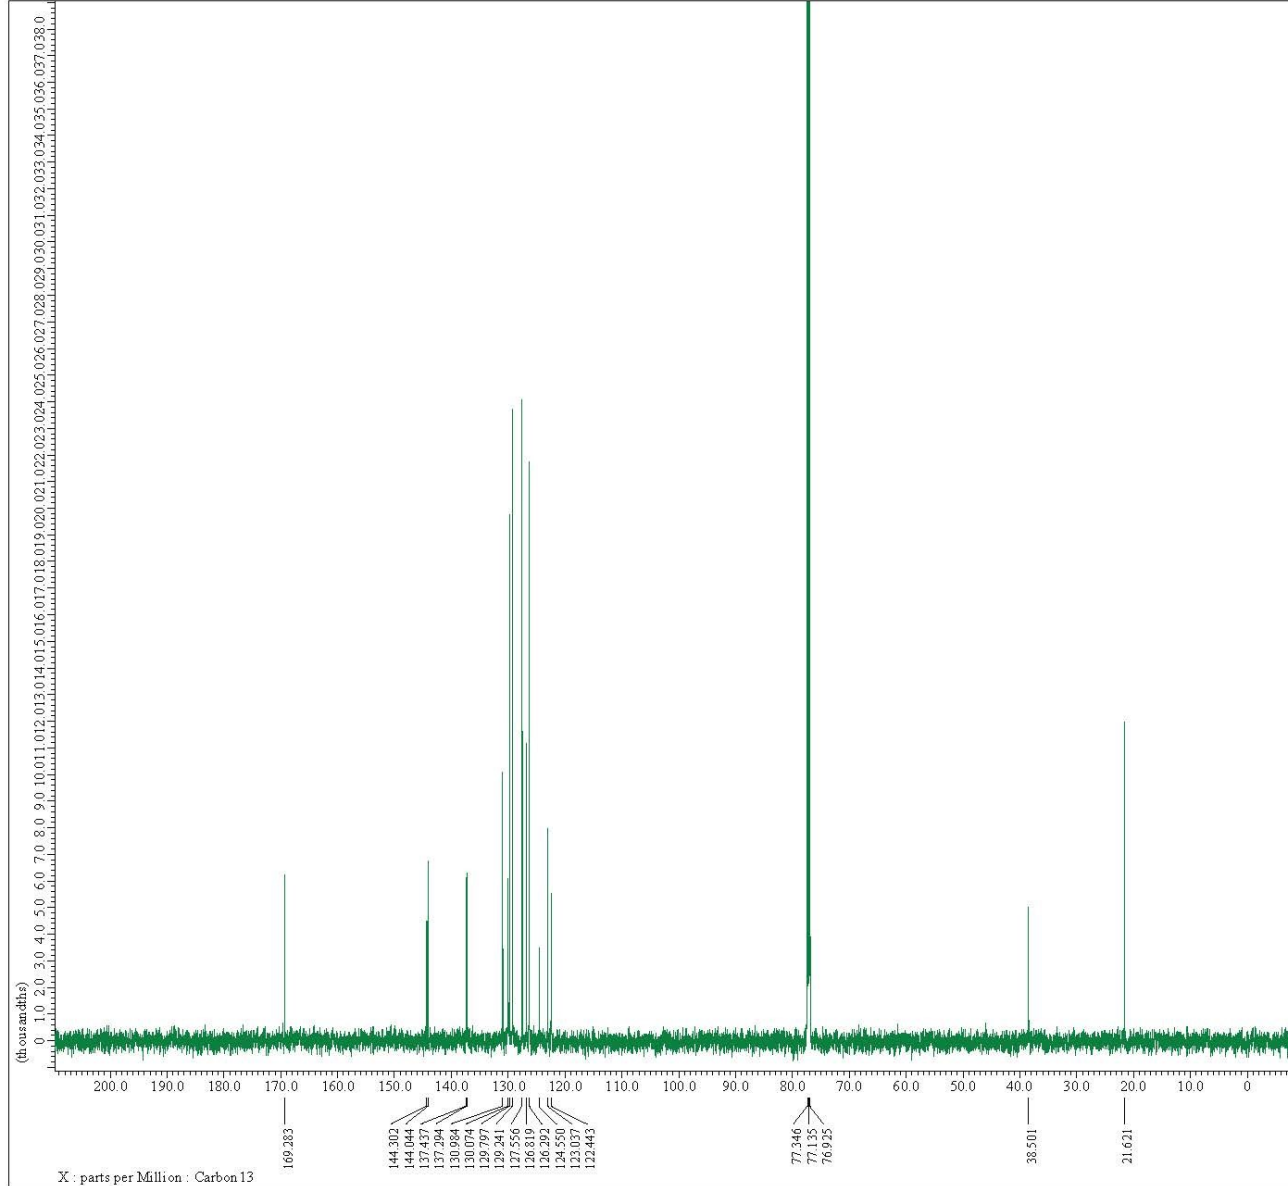

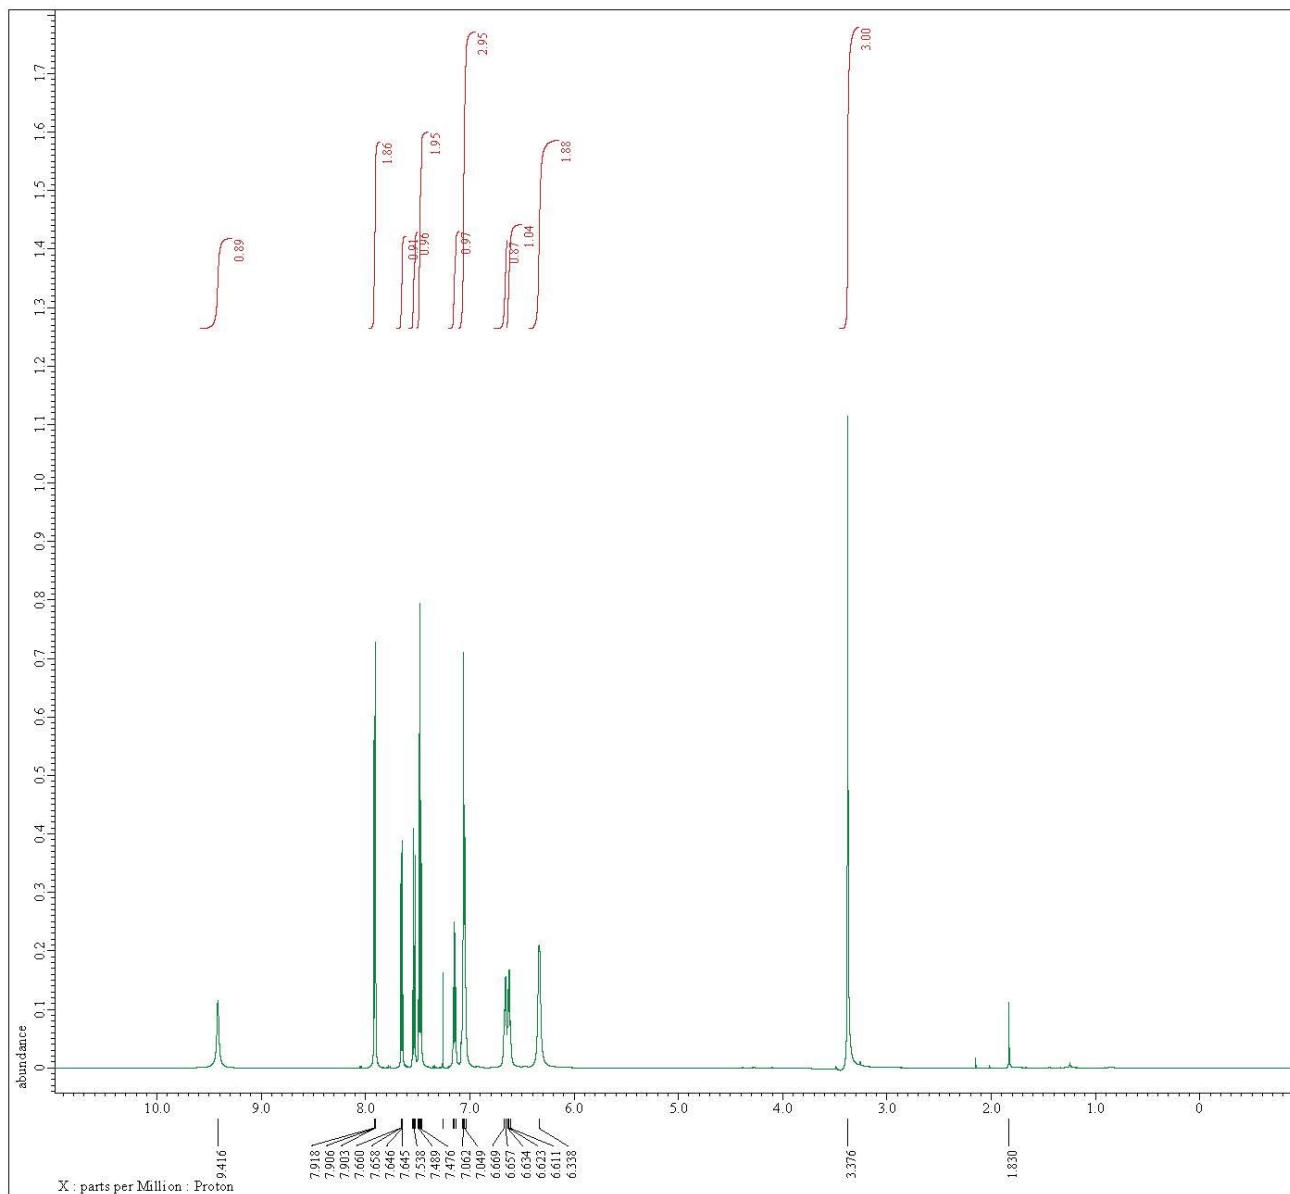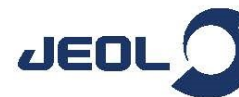

```

---- PROCESSING PARAMETERS ----
sexp( 0.2[Hz], 0.0[s] )
trapezoid( 0[Hz], 0[Hz], 80[Hz], 100[Hz] )
zerofill( 1, TRUE )
fft( 1, TRUE, TRUE )
machinephase
gpa
base_correct( Akima, 5, 0, FALSE, 3, None, FALSE )

```

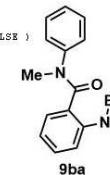

```

Filename      = TW-6-145-1_proton-1-3.jdf
Author       = delta
Experiment    = proton.jsp
Sample_id    = TW-6-145-1
Solvent      = CHLOROFORM-D
Actual_Start_Time = 19-JUN-2024 22:02:42
Revision_Time   = 20-JUN-2024 08:04:14

Data Format   = 1D REAL
Data Size    = 26214
X_Domain     = Proton
Data Title   = Proton
Data Units   = (ppm)
Dimensions   = X
Spectrometer = JNM-ECC600R/S3

Field Strength = 14.09636928[T] (600[MHz])
X_AcqDuration  = 2.18365952[s]
X_Domain       = Proton
X_Freq         = 600.1723046[MHz]
X_Offset       = 5[ppm]
X_Points       = 32768
X_Prescans     = 1
X_Resolution   = 0.45794695[Hz]
X_Sweep        = 15.0060024[kHz]
X_Sweep_Clippped = 12.00480192[kHz]
Irr_Domain     = Proton
Irr_Freq       = 600.1723046[MHz]
Irr_Offset     = 5[ppm]
Tri_Domain     = Proton
Tri_Freq       = 600.1723046[MHz]
Tri_Offset     = 8[ppm]
Blanking       = 5.0[us]
Clipped        = FALSE
Scans          = 4
Total_Scans    = 4

Relaxation_Delay = 2[s]
Recvr Gain       = 26
Temp Det         = 21.9[degC]
X_90PulseWidth  = 9.9[us]
X_Acq Time       = 2.18365952[s]
X_Angle          = 45[deg]
X_Atm            = 8.1[dB]
X_Pulse          = 4.95[us]
Irr_Mode         = Off
Tri_Mode         = Off
Dante Loop      = 200
Dante_Preset    = FALSE
Decimation_Rate = 0
Initial_Wait     = 1[s]
Phase           = (0, 90, 270, 180, 180, 270, 90, 0)
Preset_Time     = 2[s]
Preset_Time_Play = FALSE
Relaxation_Delay_Calc = 0[s]
Relaxation_Delay_Temp = 2[s]
Repetition_Time = 4.18365952[s]

```

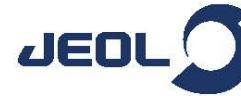

---- PROCESSING PARAMETERS ----  
blip\_cld(15, 64, 1)  
sezp(2.0[Hz], 0.0[s])  
fit(1, TRUE, TRUE)  
machinephase  
ppm

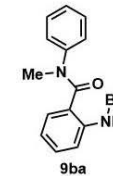

Filename = TK-6-145-1\_carbon-1-2.jdf  
Author = delta  
Experiment = carbon.jsp  
Sample Id = TK-6-145-1  
Solvent = CHLOROFORM-D  
Actual\_Start\_Time = 19-JUN-2024 22:04:44  
Revision\_Time = 19-JUN-2024 22:13:01

Data Format = 1D COMPLEX  
Dim Size = 2624  
X\_Domain = Carbon13  
Dim Title = Carbon13  
Dim Units = (ppm)  
Dimensions = X  
Spectrometer = JNM-ECZ600R/S3

Field Strength = 14.05636928(T) (600[MHz])  
X\_Acq\_Duration = 0.63206016[s]  
X\_Domain = Carbon13  
X\_Freq = 150.91343039[MHz]  
X\_Offset = 100[ppm]  
X\_Points = 32768  
X\_Prescans = 1  
X\_Resolution = 1.44496109[Hz]  
X\_Sweep = 47.34848485[kHz]  
X\_Sweep\_Clippped = 37.87878788[kHz]  
Irr\_Domain = Proton  
Irr\_Freq = 600.1723046[MHz]  
Irr\_Offset = 5[ppm]  
Blanking = 15.0[us]  
Clipped = FALSE  
Scans = 165  
Total\_Scans = 165

Relaxation\_Delay = 1.5[s]  
Recvr\_Gain = 55  
Temp\_Cel = 20.7[degC]  
X\_90\_Width = 8.1[us]  
X\_Acq\_Time = 0.63206016[s]  
X\_Angle = 30[deg]  
X\_Atn = 11[dB]  
X\_Pulse = 2.7[us]  
Irr\_Atn\_Dec = 25.803[dB]  
Irr\_Atn\_Dec\_Calc = 25.803[dB]  
Irr\_Atn\_Dec\_Default\_Calc = 25.803[dB]  
Irr\_Atn\_Noise = 25.803[dB]  
Irr\_Dec\_Bandwidth\_Hz = 7.23684211[kHz]  
Irr\_Dec\_Bandwidth\_Ppm = 12.05784078[ppm]  
Irr\_Dec\_Freq = 600.1723046[MHz]  
Irr\_Dec\_Haric\_Factor = 2.2  
Irr\_Decoupling = TRUE  
Irr\_Noise = TRUE  
Irr\_Offset\_Default = 5[ppm]  
Irr\_Pwldch = 76[us]  
Irr\_Pwldch\_Default = 76[us]  
Irr\_Pwldch\_Default\_Calc = 76[us]  
Irr\_Pwldch\_Templ = 76[us]  
Irr\_Wurst = FALSE  
Declination\_Rate = 0  
Initial\_Wait = 1[s]  
Noe\_Time = 1.5[s]  
Noe\_Time\_Flag = FALSE  
Relaxation\_Delay\_Calc = 0[s]  
Relaxation\_Delay\_Temp = 1.5[s]  
Repetition\_Time = 2.19206016[s]

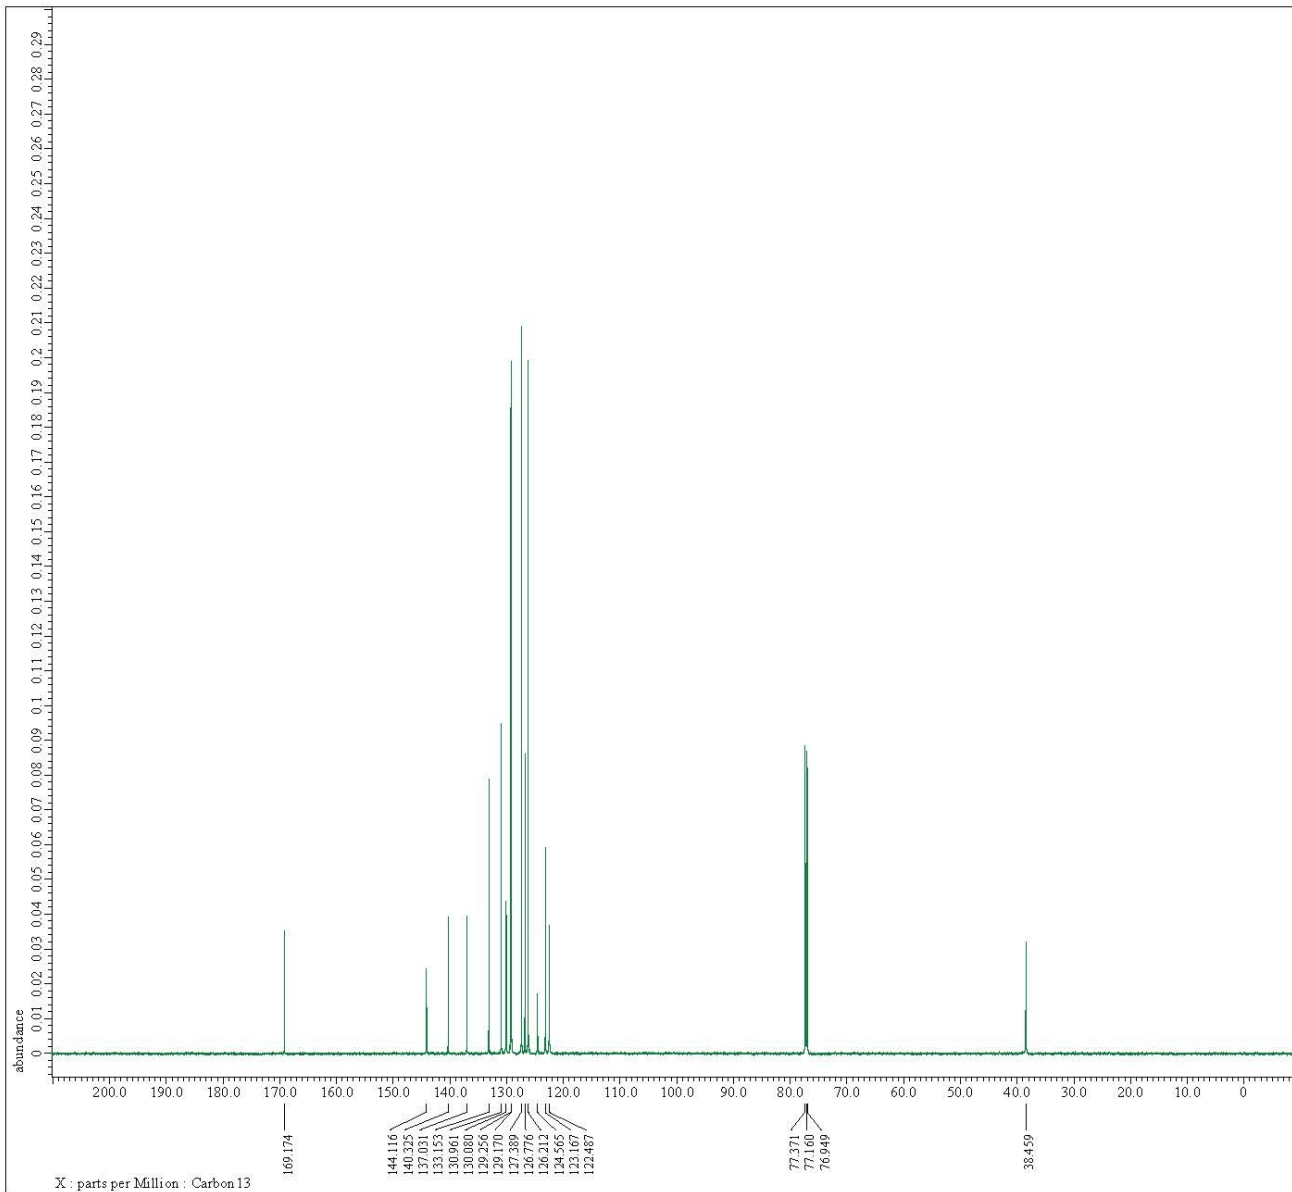



---- PROCESSING PARAMETERS ----  
sexp( 0.2[Hz], 0.0[s] )  
trapezoid( 0[Hz], 0[Hz], 80[Hz], 100[Hz] )  
zerofill( 1, TRUE )  
fft( 1, TRUE, TRUE )  
machinephase  
ppm  
reference( 7.24864[ppm], 7.26[ppm] )  
base\_correct( Akima, 5, 0, FALSE, 3, None, FALSE )

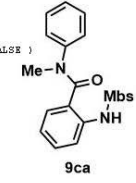

Filename = KV-1-065-4\_proton-1-3.jdf  
Author = delta  
Experiment = proton.jxp  
Sample\_id = KV-1-065-4  
Solvent = CHLOROFORM-D  
Actual\_Start\_Time = 19-JUN-2024 22:32:48  
Version\_Time = 20-JUN-2024 07:57:18  
Data\_Format = 1D REAL  
Data\_Size = 26214  
X\_Domain = Proton  
Data\_Title = Proton  
Data\_Units = (ppm)  
Dimensions = X  
Spectrometer = JNM-ECZ600R/S3  
Field\_Strength = 14.09636928[T] (600[MHz])  
X\_Acq\_Duration = 2.18365952[s]  
X\_Domain = Proton  
X\_Freq = 600.1723046[MHz]  
X\_Offset = 5[ppm]  
X\_Points = 32768  
X\_Prescans = 1  
X\_Resolution = 0.45794695[Hz]  
X\_Sweep = 15.0060024[KHz]  
X\_Sweep\_Clippped = 12.00480192[KHz]  
Irr\_Domain = Proton  
Irr\_Freq = 600.1723046[MHz]  
Irr\_Offset = 5[ppm]  
Tri\_Domain = Proton  
Tri\_Freq = 600.1723046[MHz]  
Tri\_Offset = 5[ppm]  
Blanking = 5.0[us]  
Clipped = FALSE  
Scans = 4  
Total\_Scans = 4  
Relaxation\_Delay = 2[s]  
Recvr\_Gain = 26  
Temp\_Set = 28.2[degC]  
X\_90\_Pulse = 9.9[us]  
X\_Acq\_Time = 2.18365952[s]  
X\_Angle = 45[deg]  
X\_Atn = 8.1[dB]  
X\_Pulse = 4.95[us]  
Irr\_Mode = Off  
Tri\_Mode = Off  
Dante\_Loop = 200  
Dante\_Preset = FALSE  
Decimation\_Rate = 0  
Initial\_Wait = 1[s]  
Phase = (0, 90, 270, 180, 180, 270, 90, 0)  
Preset\_Time = 2[s]  
Preset\_Time\_Play = FALSE  
Relaxation\_Delay\_Calc = 0[s]  
Relaxation\_Delay\_Temp = 2[s]  
Repetition\_Time = 4.18365952[s]

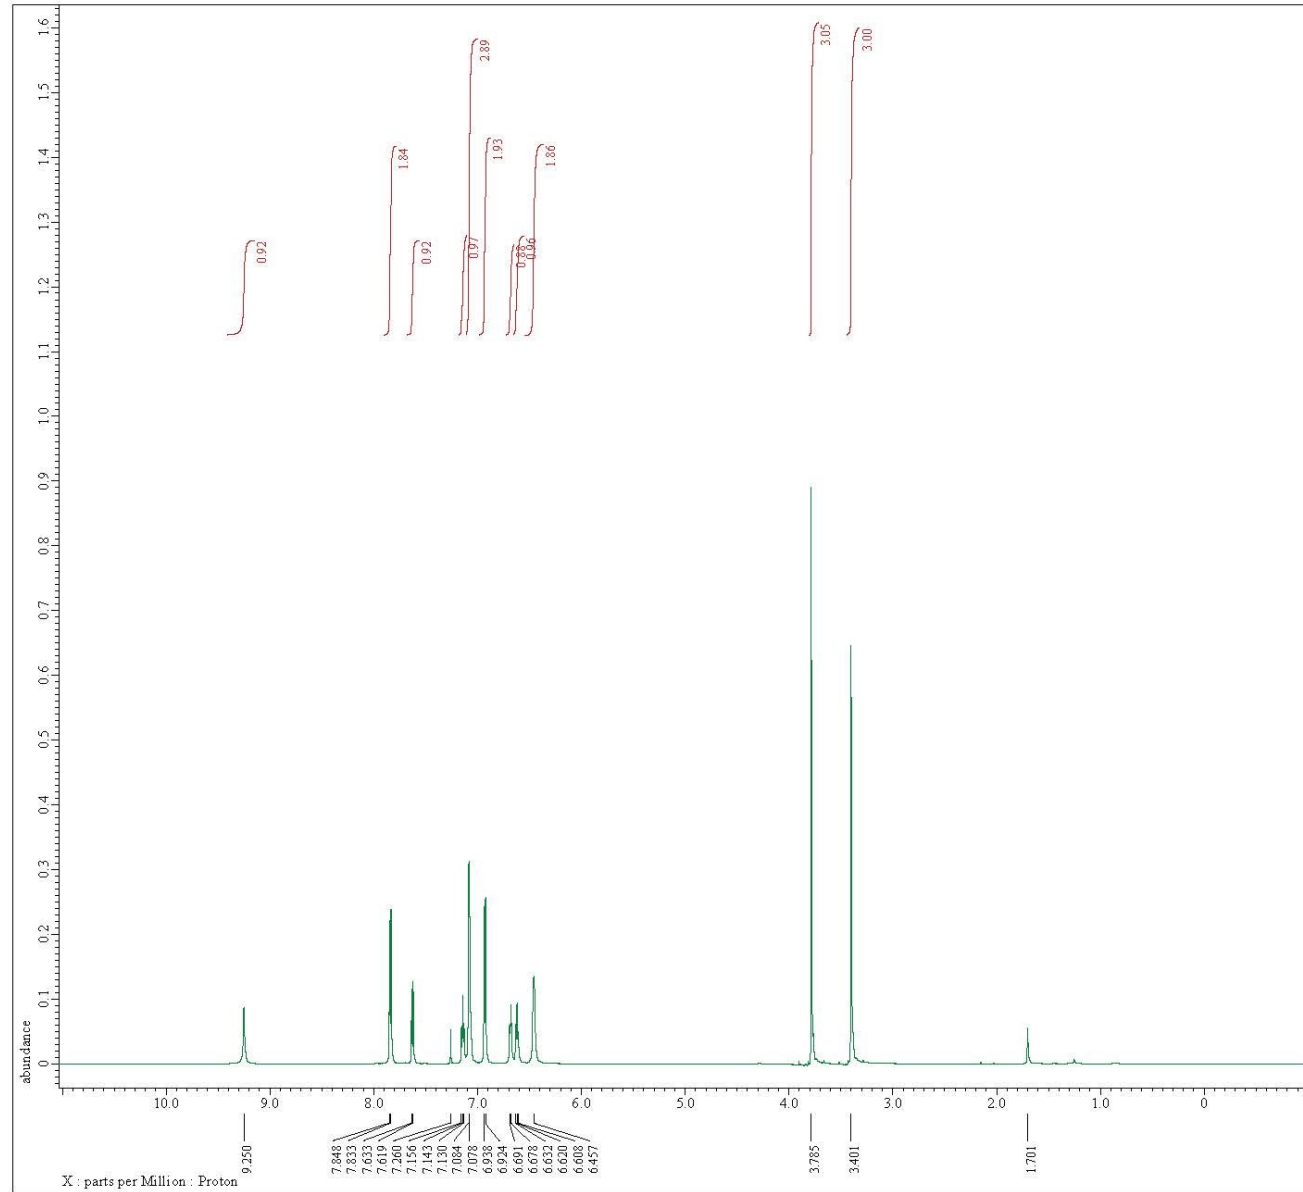



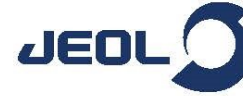

---- PROCESSING PARAMETERS ----

```
blip_cld( 16, 64, 1 )
serp( 2.0[Hz], 0.0[s] )
fft( 1, TRUE, TRUE )
machinephase
ppm
```

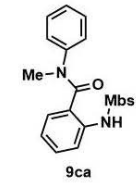

```
Filename = KY-1-065-4_carbon-1-2_jdf
Author = delta
Experiment = carbon_jsp
Sample_id = KY-1-065-4
Solvent = CHLOROFORM-D
Actual_Start_Time = 19-JUN-2024 22:34:50
Revision_Time = 19-JUN-2024 22:40:13

Data Format = 1D COMPLEX
Data Size = 26214
X_Domain = Carbon13
Data Title = Carbon13
Data Units = [ppm]
Dimensions = X
Spectrometer = JNM-ECZ600R/S3

Field Strength = 14.09636928[T] (600[MHz])
X_Acq_Duration = 0.69206016[s]
X_Domain = Carbon13
X_Freq = 150.91343039[MHz]
X_Offset = 100[ppm]
X_Points = 32768
X_Prescans = 1
X_Resolution = 1.44496109[Hz]
X_Sweep = 47.34848485[kHz]
X_Sweep_Clipped = 37.87878788[kHz]
Irr_Domain = Proton
Irr_Freq = 600.1723046[MHz]
Irr_Offset = 5[ppm]
Blanking = 15.0[us]
Clipped = FALSE
Scans = 224
Total_Scans = 224

Relaxation_Delay = 1.5[s]
Recvs_Gain = 56
Temp_Set = 22.9[dC]
X_90_Width = 0.11[us]
X_Acq_Time = 0.69206016[s]
X_Angle = 30[deg]
X_Am = 11[dB]
X_Pulse = 2.7[us]
Irr_Am_Dec = 25.803[dB]
Irr_Am_Dec_Calc = 25.803[dB]
Irr_Am_Dec_Default_Calc = 25.803[dB]
Irr_Am_Noise = 25.803[dB]
Irr_Dec_Bandwidth_Hz = 7.22684211[kHz]
Irr_Dec_Bandwidth_Ppm = 12.05794078[ppm]
Irr_Dec_Freq = 600.1723046[MHz]
Irr_Dec_Magic_Factor = 2.2
Irr_Decoupling = TRUE
Irr_Noise = TRUE
Irr_Offset_Default = 5[ppm]
Irr_Pwidth = 76[us]
Irr_Pwidth_Default = 76[us]
Irr_Pwidth_Default_Calc = 76[us]
Irr_Pwidth_Templ = 76[us]
Irr_Wurst = FALSE
Decimation_Rate = 0
Initial_Wait = 1[s]
Noe_Time = 1.5[s]
Noe_Time_Flag = FALSE
Relaxation_Delay_Calc = 0[s]
Relaxation_Delay_Temp = 1.5[s]
Repetition_Time = 2.19206016[s]
```

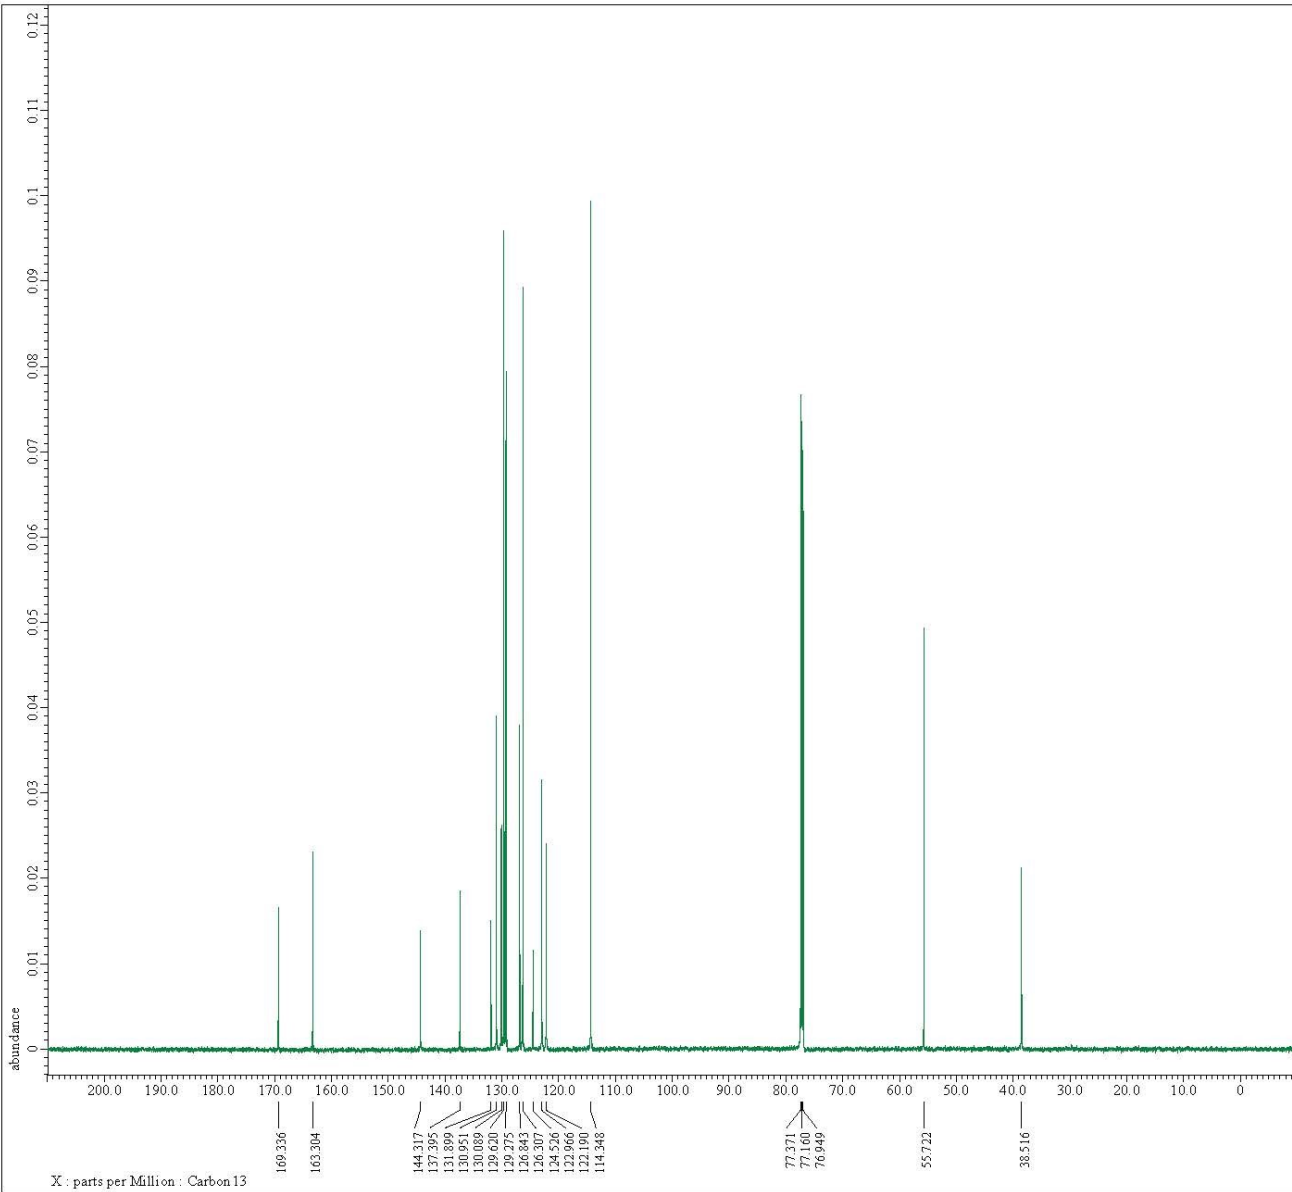



---- PROCESSING PARAMETERS ----  
sexp( 0.2[Hz], 0.0[s] )  
trapezoid( 0[Hz], 0[Hz], 80[Hz], 100[Hz] )  
zerofill( 1, TRUE )  
fft( 1, TRUE, TRUE )  
machinephase  
ppa

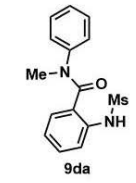

Filename = TW-6-150-1\_proton-1-3.jdf  
Author = delta  
Experiment = proton.jxp  
Sample\_id = TW-6-150-1  
Solvent = CHLOROFORM-D  
Actual\_Start\_Time = 24-JUN-2024 21:10:58  
Revision\_Time = 24-JUN-2024 22:02:56

Data Format = 1D COMPLEX  
Data Size = 26214  
X\_Domain = Proton  
Y\_Domain = Proton  
Data Title = Proton  
Data Units = (ppm)  
Dimensions = X  
Spectrometer = JNM-ECZ600R/S3

Field Strength = 14.0963628[T] (600[MHz])  
X\_Acq\_Duration = 2.18365952[s]  
X\_Domain = Proton  
X\_Freq = 600.1723046[MHz]  
X\_Offset = 8[ppm]  
X\_Points = 32768  
X\_Prescans = 1  
X\_Resolution = 0.45794695[Hz]  
X\_Sweep = 15.0060024[KHz]  
X\_Sweep\_Clippped = 12.00480192[KHz]

Irr\_Domain = Proton  
Irr\_Freq = 600.1723046[MHz]  
Irr\_Offset = 8[ppm]  
Tri\_Domain = Proton  
Tri\_Freq = 600.1723046[MHz]  
Tri\_Offset = 8[ppm]  
Blanking = 5.0[us]  
Clipped = FALSE  
Scans = 4  
Total\_Scans = 4

Relaxation\_Delay = 2[s]  
Recvr Gain = 36  
Temp\_Det = 21[degC]  
X\_90\_Width = 9.9[us]  
X\_Acq\_Time = 2.18365952[s]  
X\_Angle = 45[deg]  
X\_Atn = 8.1[dB]  
X\_Pulse = 4.95[us]  
Irr\_Mode = Off  
Tri\_Mode = Off  
Dante\_Loop = 200  
Dante\_Preset = FALSE  
Decimation\_Rate = 0  
Initial\_Wait = 1[s]  
Phase = (0, 90, 270, 180, 180, 270, 90, 0)  
Preset\_Time = 2[s]  
Preset\_Time\_Play = FALSE  
Relaxation\_Delay\_Calc = 0[s]  
Relaxation\_Delay\_Temp = 2[s]  
Repetition\_Time = 4.18365952[s]

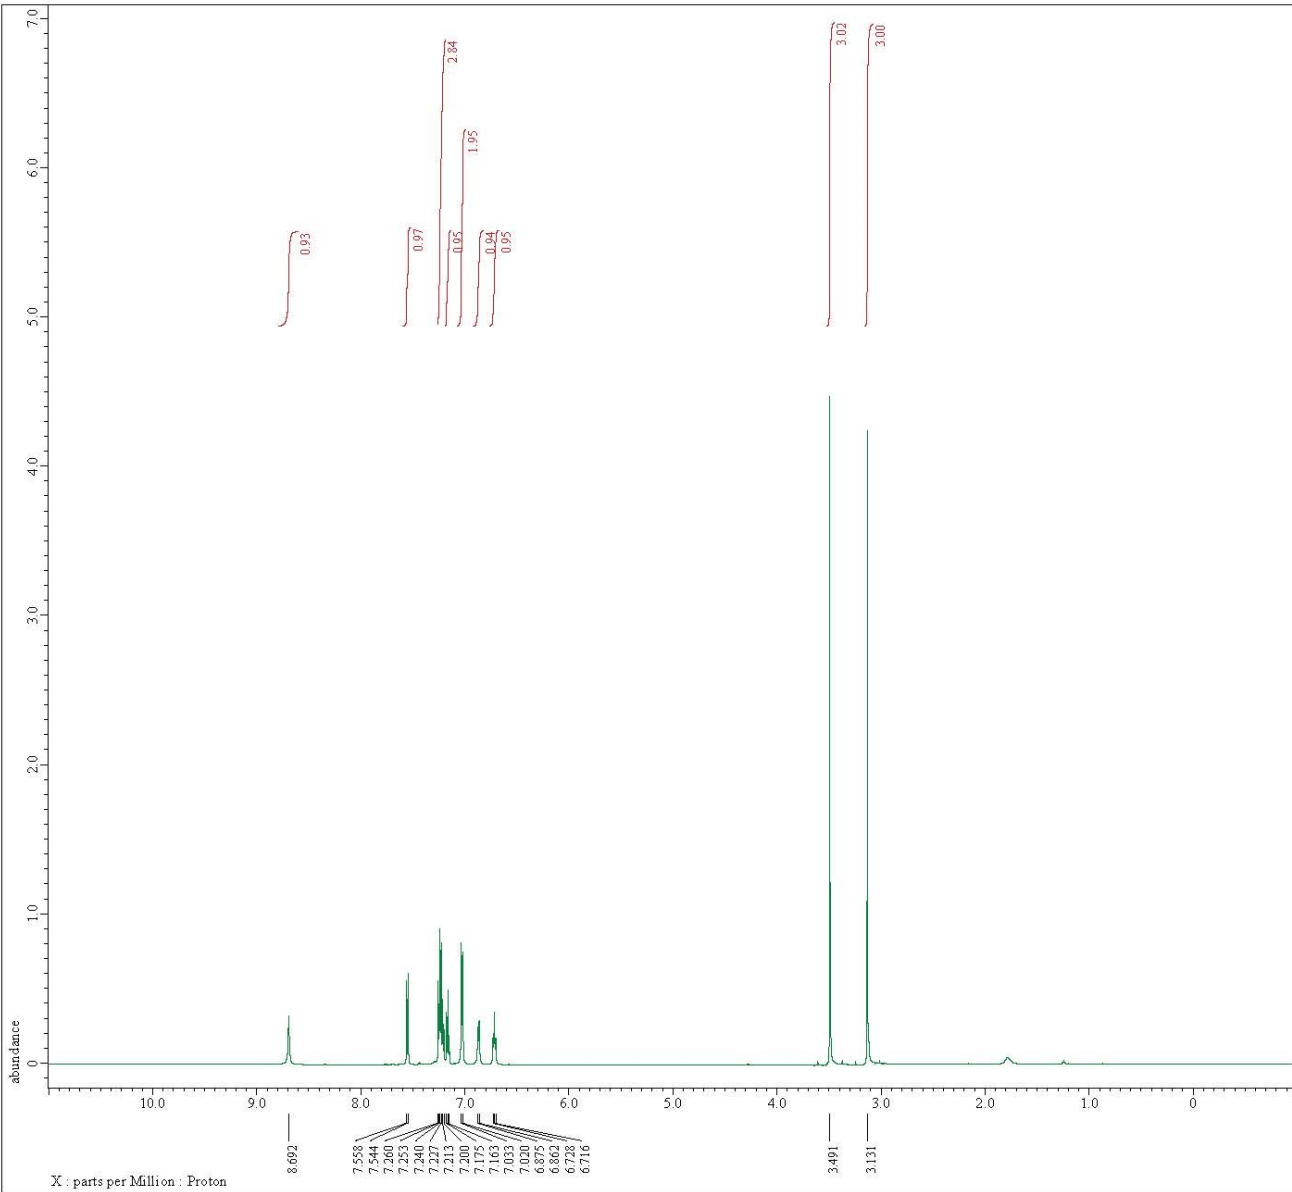

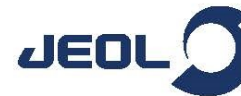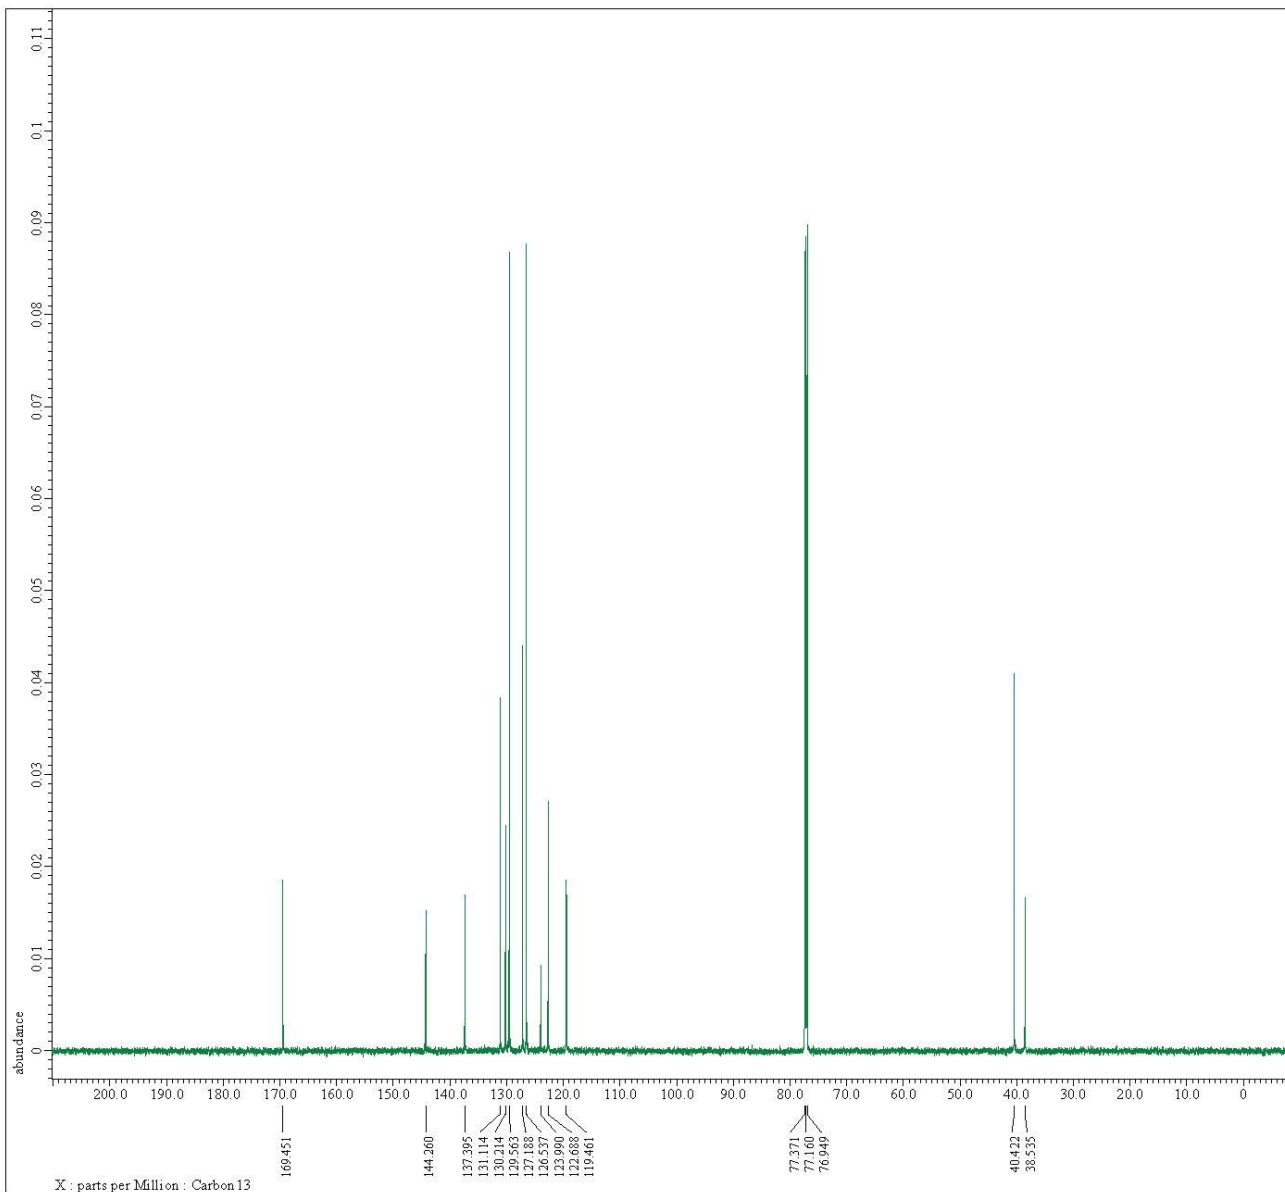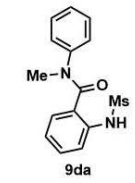

---- PROCESSING PARAMETERS ----  
blip\_ch( [6, 64, 1 ]  
sexp( 2.0Hz, 0.0[s] )  
fft( 1, TRUE, TRUE )  
machphase  
ppm

Filename = TK-6-150-1\_carbon-1-2.jdr  
Author = delta  
Experiment = carbon\_3xp  
Sample\_Id = TK-6-150-1  
Solvent = CHLOROFORM-D  
Actual\_Start\_Time = 24-JUN-2024 21:11:45  
Revision\_Time = 24-JUN-2024 21:12:13  
Data\_Format = 1D\_COMPLEX  
Dim\_Size = 25214  
X\_Domain = Carbon13  
Dim\_Title = Carbon13  
Dim\_Units = [ppm]  
Dimensions = X  
Spectrometer = JNM-ECP600R/S3

Field\_Strength = 14.09636928 [T] (600 [MHz])  
X\_Acq\_Duration = 0.69206016 [s]  
X\_Domain = Carbon13  
X\_Freq = 150.91343039 [MHz]  
X\_Offset = 100 [ppm]  
X\_Points = 32768  
X\_Prescans = 1  
X\_Resolution = 1.44496109 [Hz]  
X\_Sweep = 47.34848485 [kHz]  
X\_Sweep\_Clipped = 37.87878788 [kHz]  
Irr\_Domain = Proton  
Irr\_Freq = 600.1723046 [MHz]  
Irr\_Offset = 5 [ppm]  
Blanking = 15.0 [us]  
Clipped = FALSE  
Scans = 99  
Total\_Scans = 99  
Relaxation\_Delay = 1 [s]  
Recov\_Gain = 55  
Temp\_Set = 21 [dC]  
X\_90\_Width = 8.1 [us]  
X\_Acq\_Time = 0.69206016 [s]  
X\_Angle = 30 [deg]  
X\_Atn = 11 [dB]  
X\_Pulse = 2.7 [us]  
Irr\_Atn\_Dec = 25.803 [dB]  
Irr\_Atn\_Dec\_Calc = 25.803 [dB]  
Irr\_Atn\_Dec\_Default\_Calc = 25.803 [dB]  
Irr\_Dec\_Bandwidth\_Hz = 7.23664211 [kHz]  
Irr\_Dec\_Bandwidth\_Ppm = 12.05794078 [ppm]  
Irr\_Dec\_Freq = 600.1723046 [MHz]  
Irr\_Dec\_Merit\_Factor = 2.2  
Irr\_Decoupling = TRUE  
Irr\_Noise = FALSE  
Irr\_Noise = WALTZ  
Irr\_Offset\_Default = 5 [ppm]  
Irr\_Pwrch = 76 [us]  
Irr\_Pwrch\_Default = 76 [us]  
Irr\_Pwrch\_Default\_Calc = 76 [us]  
Irr\_Pwrch\_Temp = 76 [us]  
Irr\_Wurst = FALSE  
Decimation\_Rate = 0  
Initial\_Wait = 1 [s]  
Noe\_Time = 1 [s]  
Noe\_Time\_Play = FALSE  
Relaxation\_Delay\_Calc = 0 [s]  
Relaxation\_Delay\_Temp = 1 [s]  
Repetition\_Time = 1.69206016 [s]

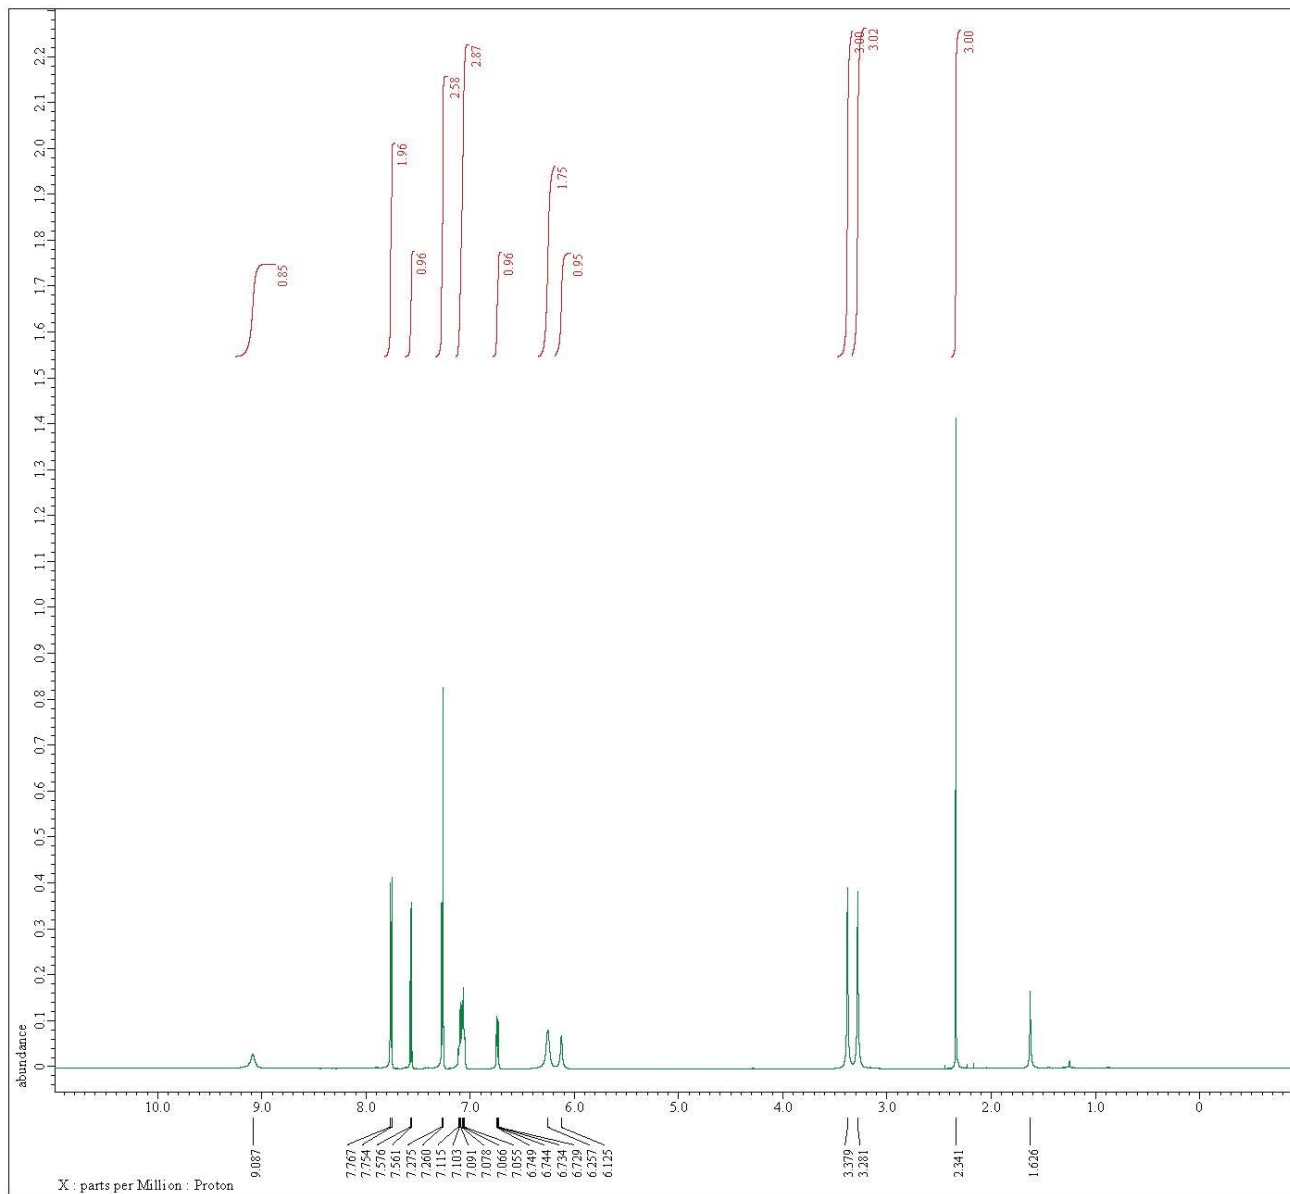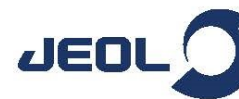

---- PROCESSING PARAMETERS ----  
 sexp( 0.2[Hz], 0.0[s] )  
 trapezoid( 0[Hz], 0[Hz], 80[Hz], 100[Hz] )  
 zerofill( 1, TRUE )  
 fit( 1, TRUE, TRUE )  
 machinephase  
 ppm  
 reference( 7.24864[ppm], 7.26[ppm] )  
 thresh( 1.32653[Hz], 1, ' )

以下由名: KY-1-050-2 proton-1-1.jdf

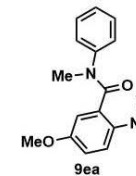

Filename = KY-1-050-2\_proton-1-2.jdf  
 Author = delta  
 Experiment = proton.jxp  
 Sample\_Id = KY-1-050-2  
 Solvent = CHLOROFORM-D  
 Actual\_Start\_Time = 20-JUN-2024 22:34:03  
 Revision\_Time = 21-JUN-2024 08:06:00

Data Format = 1D COMPLEX  
 Dia\_Size = 2824  
 X\_Domain = Proton  
 Dia\_Title = Proton  
 Dia\_Units = (ppm)  
 Dimensions = X  
 Spectrometer = JNM-EZ600R/S3

Field\_Strength = 14.09636928[T] (600[MHz])  
 X\_Acq\_Duration = 2.18365952[s]  
 X\_Domain = Proton  
 X\_Freq = 600.1723046[MHz]  
 X\_Offset = 8[ppm]  
 X\_Points = 32788  
 X\_Prescans = 1  
 X\_Resolution = 0.45794605[Hz]  
 X\_Sweep = 15.0060024[kHz]  
 X\_Sweep\_Clippped = 12.00480192[kHz]  
 Itr\_Domain = Proton  
 Itr\_Freq = 600.1723046[MHz]  
 Itr\_Offset = 8[ppm]  
 Tri\_Domain = Proton  
 Tri\_Freq = 600.1723046[MHz]  
 Tri\_Offset = 8[ppm]  
 Blanking = 5.0[us]  
 Clipped = FALSE  
 Scans = 4  
 Total\_Scans = 4

Relaxation\_Delay = 2[s]  
 Recvr\_Gain = 36  
 Temp\_Get = 21.5[degC]  
 X\_90\_Width = 9.9[us]  
 X\_Acq\_Time = 2.18365952[s]  
 X\_Angle = 45[deg]  
 X\_Atn = 8.1[dB]  
 X\_Pulse = 4.35[us]  
 Itr\_Mode = Off  
 Tri\_Mode = Off  
 Danta\_Loop = 200  
 Danta\_Preset = FALSE  
 Decimation\_Rate = 0  
 Initial\_Wait = 1[s]  
 Phase = (0, 90, 270, 180, 180, 270, 90, 0)  
 Preset\_Time = 2[s]  
 Preset\_Time\_Flag = FALSE  
 Relaxation\_Delay\_Calc = 0[s]  
 Relaxation\_Delay\_Temp = 2[s]  
 Repetition\_Time = 4.18365952[s]



---- PROCESSING PARAMETERS ----  
blip\_cld(15, 64, 1)  
sezp(2.0[Hz], 0.0[s])  
fit(1, TRUE, TRUE)  
machinephase  
ppm

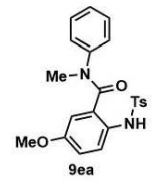

Filename = KY-1-050-2\_carbon-1-2.jdf  
Author = delta  
Experiment = carbon\_jsp  
Sample Id = KY-1-050-2  
Solvent = CHLOROFORM-D  
Actual\_Start\_Time = 20-JUN-2024 22:36:06  
Revision\_Time = 20-JUN-2024 22:38:52

Data Format = 1D COMPLEX  
Dir\_Size = 2624  
X\_Domain = Carbon13  
Dir\_Title = Carbon13  
Dir\_Units = (ppm)  
Dimensions = X  
Spectrometer = JNM-ECZ600R/S3

Field\_Strength = 14.05636928(T) (600[MHz])  
X\_Acq\_Duration = 0.69206016[s]  
X\_Domain = Carbon13  
X\_Freq = 150.91343039[MHz]  
X\_Offset = 100[ppm]  
X\_Points = 32768  
X\_Prescans = 1  
X\_Resolution = 1.44496109[Hz]  
X\_Sweep = 47.34848485[kHz]  
X\_Sweep\_Clipped = 37.87878788[kHz]  
Irr\_Domain = Proton  
Irr\_Freq = 600.1723046[MHz]  
Irr\_Offset = 5[ppm]  
Blanking = 15.0[us]  
Clipped = FALSE  
Scans = 71  
Total\_Scans = 71

Relaxation\_Delay = 1[s]  
Recvr\_Gain = 56  
Temp\_Cst = 21.2[degC]  
X\_90\_Width = 8.11[us]  
X\_Acq\_Time = 0.69206016[s]  
X\_Angle = 30[deg]  
X\_Atn = 11[dB]  
X\_Pulse = 2.7[us]  
Irr\_Atn\_Dec = 25.803[dB]  
Irr\_Atn\_Dec\_Calc = 25.803[dB]  
Irr\_Atn\_Dec\_Default\_Calc = 25.803[dB]  
Irr\_Atn\_Noise = 25.803[dB]  
Irr\_Dec\_Bandwidth\_Hz = 7.23684211[kHz]  
Irr\_Dec\_Bandwidth\_Ppm = 12.05784078[ppm]  
Irr\_Dec\_Freq = 600.1723046[MHz]  
Irr\_Dec\_Haric\_Factor = 2.2  
Irr\_Decoupling = TRUE  
Irr\_Noise = TRUE  
Irr\_Noise = WAIT  
Irr\_Offset\_Default = 5[ppm]  
Irr\_Pwldch = 76[us]  
Irr\_Pwldch\_Default = 76[us]  
Irr\_Pwldch\_Default\_Calc = 76[us]  
Irr\_Pwldch\_Templ = 76[us]  
Irr\_Thurst = FALSE  
Decimation\_Rate = 0  
Initial\_Wait = 1[s]  
Noe\_Time = 1[s]  
Noe\_Time\_Flag = FALSE  
Relaxation\_Delay\_Calc = 0[s]  
Relaxation\_Delay\_Temp = 1[s]  
Repetition\_Time = 1.69206016[s]

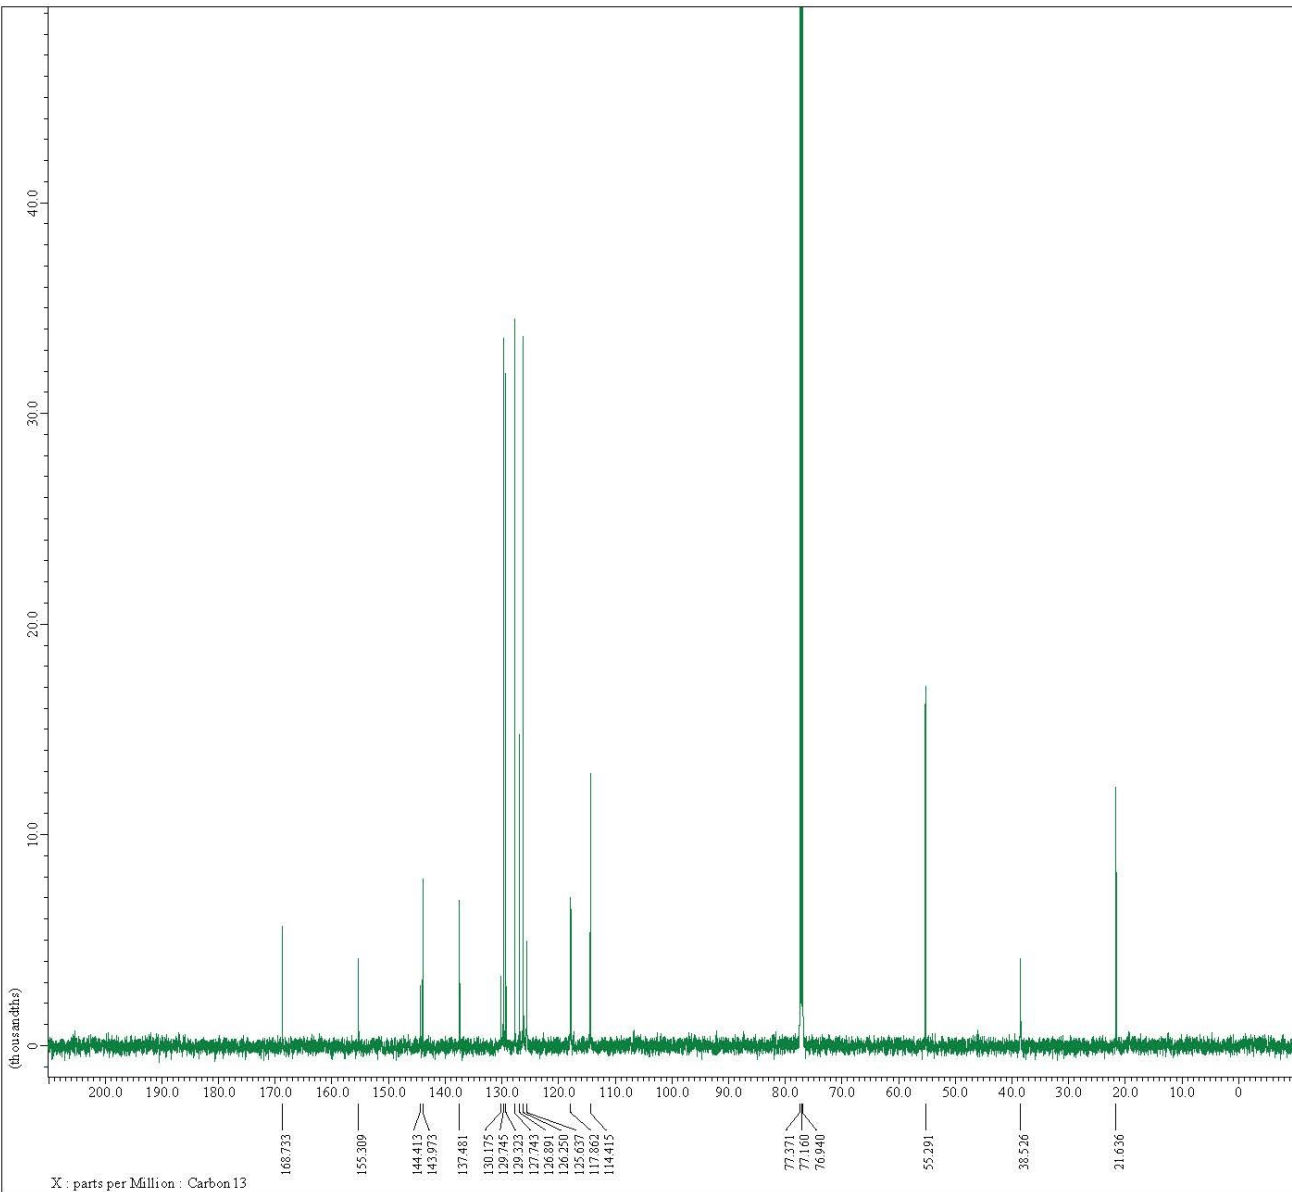



---- PROCESSING PARAMETERS ----

```
sexp( 0.2[Hz], 0.0[s] )
trapzoid( 0[Hz], 0[Hz], 80[Hz], 100[Hz] )
zerofill( 1, TRUE )
fit( 1, TRUE, TRUE )
machinephase
ppm
base_correct( Akima, 5, 0, FALSE, 3, None, FALSE )
```

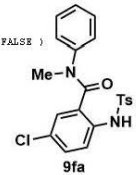

```
Filename = NV-1-053-5_proton-1-3.jdf
Author = delta
Experiment = proton.jpg
Sample Id = NV-1-053-5
Solvent = CHLOROFORM-D
Actual_Start_Time = 23-JUN-2024 13:25:00
Revision_Time = 24-JUN-2024 08:06:03

Data Format = 1D REAL
Da Size = 26214
X_Domain = Proton
Da Title = Proton
Da Units = (ppm)
Dimensions = X
Spectrometer = JNM-ECZ600R/S3

Field Strength = 14.09636928[T] (600[MHz])
X_Acq_Duration = 2.18365952[s]
X_Domain = Proton
X_Freq = 600.1723046[MHz]
X_Offset = 8[ppm]
X_Points = 32768
X_Prescans = 1
X_Resolution = 0.45794605[Hz]
X_Sweep = 15.0060024[kHz]
X_Sweep_Clippped = 12.00480192[kHz]
Irr_Domain = Proton
Irr_Freq = 600.1723046[MHz]
Irr_Offset = 8[ppm]
Tri_Domain = Proton
Tri_Freq = 600.1723046[MHz]
Tri_Offset = 8[ppm]
Blanking = 5.0[us]
Clipped = FALSE
Scans = 4
Total_Scans = 4

Relaxation_Delay = 2[s]
Recvr_Gain = 36
Temp_Get = 21.9[degC]
X_90_Width = 9.9[us]
X_Acq_Time = 2.18365952[s]
X_Angle = 45[deg]
X_Atn = 8.1[dB]
X_Pulse = 4.35[us]
Irr_Mode = Off
Tri_Mode = Off
Danta_Loop = 200
Danta_Preset = FALSE
Decimation_Rate = 0
Initial_Wait = 1[s]
Phase = (0, 90, 270, 180, 180, 270, 90, 0)
Preset_Time = 2[s]
Preset_Time_Flag = FALSE
Relaxation_Delay_Calc = 0[s]
Relaxation_Delay_Temp = 2[s]
Repetition_Time = 4.18365952[s]
```

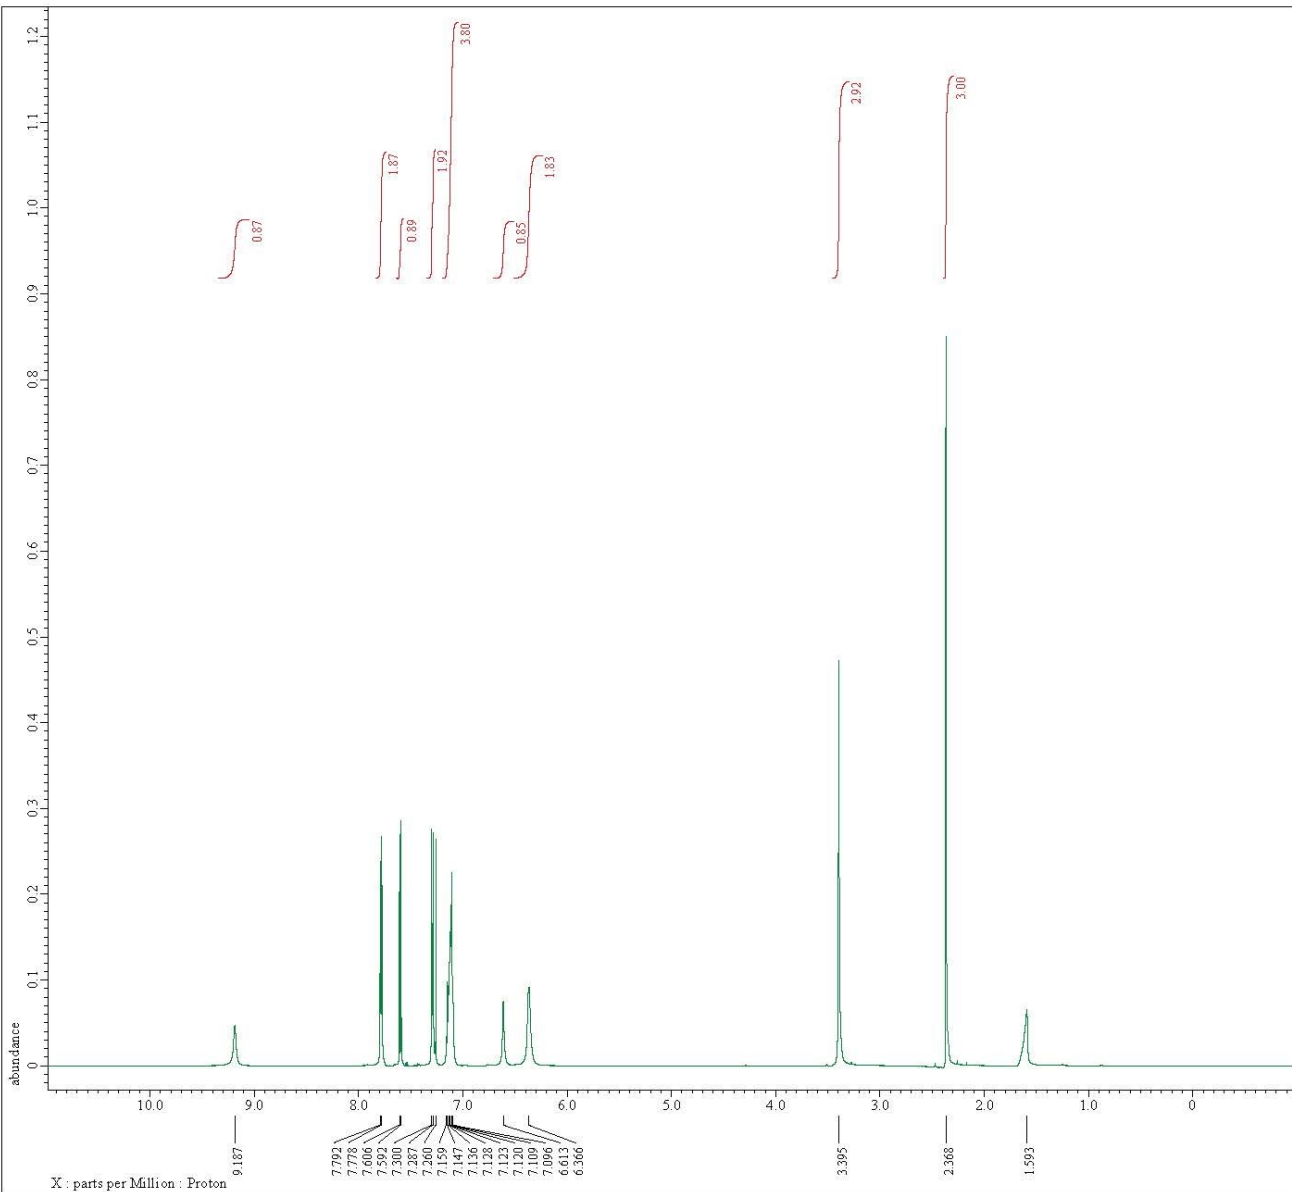



---- PROCESSING PARAMETERS ----

```
blip_cld(16, 64, 1)
secp(2.01Hz, 0.0[s])
fft(1, TRUE, TRUE)
machinephase
ppm
```

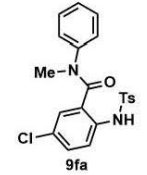

```
Filename = KY-1-059-5_carbon-1-2_jdf
Author = delta
Experiment = carbon_jep
Sample_id = KY-1-059-5
Solvent = CHLOROFORM-D
Actual_Start_Time = 23-JUN-2024 13:27:02
Revision_Time = 23-JUN-2024 13:34:26

Data Format = 1D COMPLEX
Data Size = 26214
X_Domain = Carbon13
Data Title = Carbon13
Data Units = [ppm]
Dimensions = X
Spectrometer = JNM-ECZ600R/S3

Field Strength = 14.09636928 [T] (600 [MHz])
X_Acq_Duration = 0.69206016 [s]
X_Domain = Carbon13
X_Freq = 150.91343039 [MHz]
X_Offset = 100 [ppm]
X_Points = 32768
X_Prescans = 1
X_Resolution = 1.44496109 [Hz]
X_Sweep = 47.34848485 [kHz]
X_Sweep_Clippped = 37.87878788 [kHz]
Irr_Domain = Proton
Irr_Freq = 600.1723046 [MHz]
Irr_Offset = 5 [ppm]
Blanking = 15.0 [us]
Clipped = FALSE
Scans = 256
Total_Scans = 256

Relaxation_Delay = 1 [s]
Recvs_Gain = 56
Temp_Set = 21 [dC]
X_90_Width = 0.11 [us]
X_Acq_Time = 0.69206016 [s]
X_Angle = 30 [deg]
X_Am = 11 [dB]
X_Pulse = 2.7 [us]
Irr_Am_Dec = 25.803 [dB]
Irr_Am_Dec_Calc = 25.803 [dB]
Irr_Am_Dec_Default_Calc = 25.803 [dB]
Irr_Am_Noise = 25.803 [dB]
Irr_Dec_Bandwidth_Hz = 7.22694211 [kHz]
Irr_Dec_Bandwidth_Ppm = 12.05794078 [ppm]
Irr_Dec_Freq = 600.1723046 [MHz]
Irr_Dec_Magic_Factor = 2.2
Irr_Decoupling = TRUE
Irr_Noise = TRUE
Irr_Offset_Default = 5 [ppm]
Irr_Pwidth = 76 [us]
Irr_Pwidth_Default = 76 [us]
Irr_Pwidth_Default_Calc = 76 [us]
Irr_Pwidth_Templ = 76 [us]
Irr_Wurst = FALSE
Decimation_Rate = 0
Initial_Wait = 1 [s]
Noe_Time = 1 [s]
Noe_Time_Flag = FALSE
Relaxation_Delay_Calc = 0 [s]
Relaxation_Delay_Temp = 1 [s]
Repetition_Time = 1.69206016 [s]
```

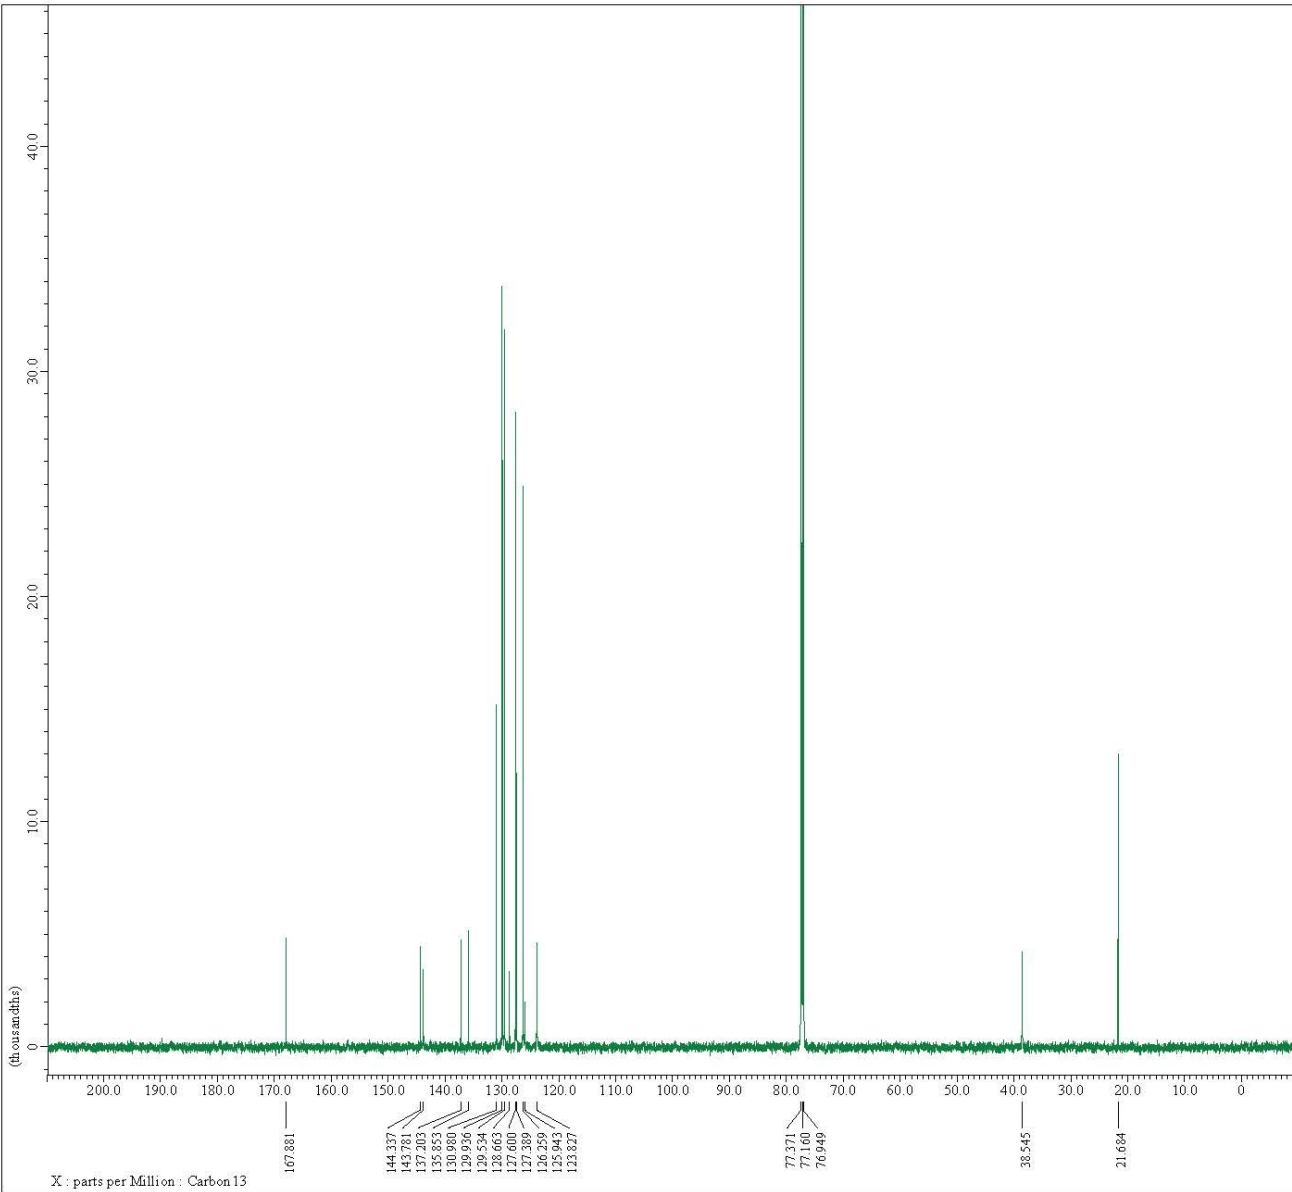

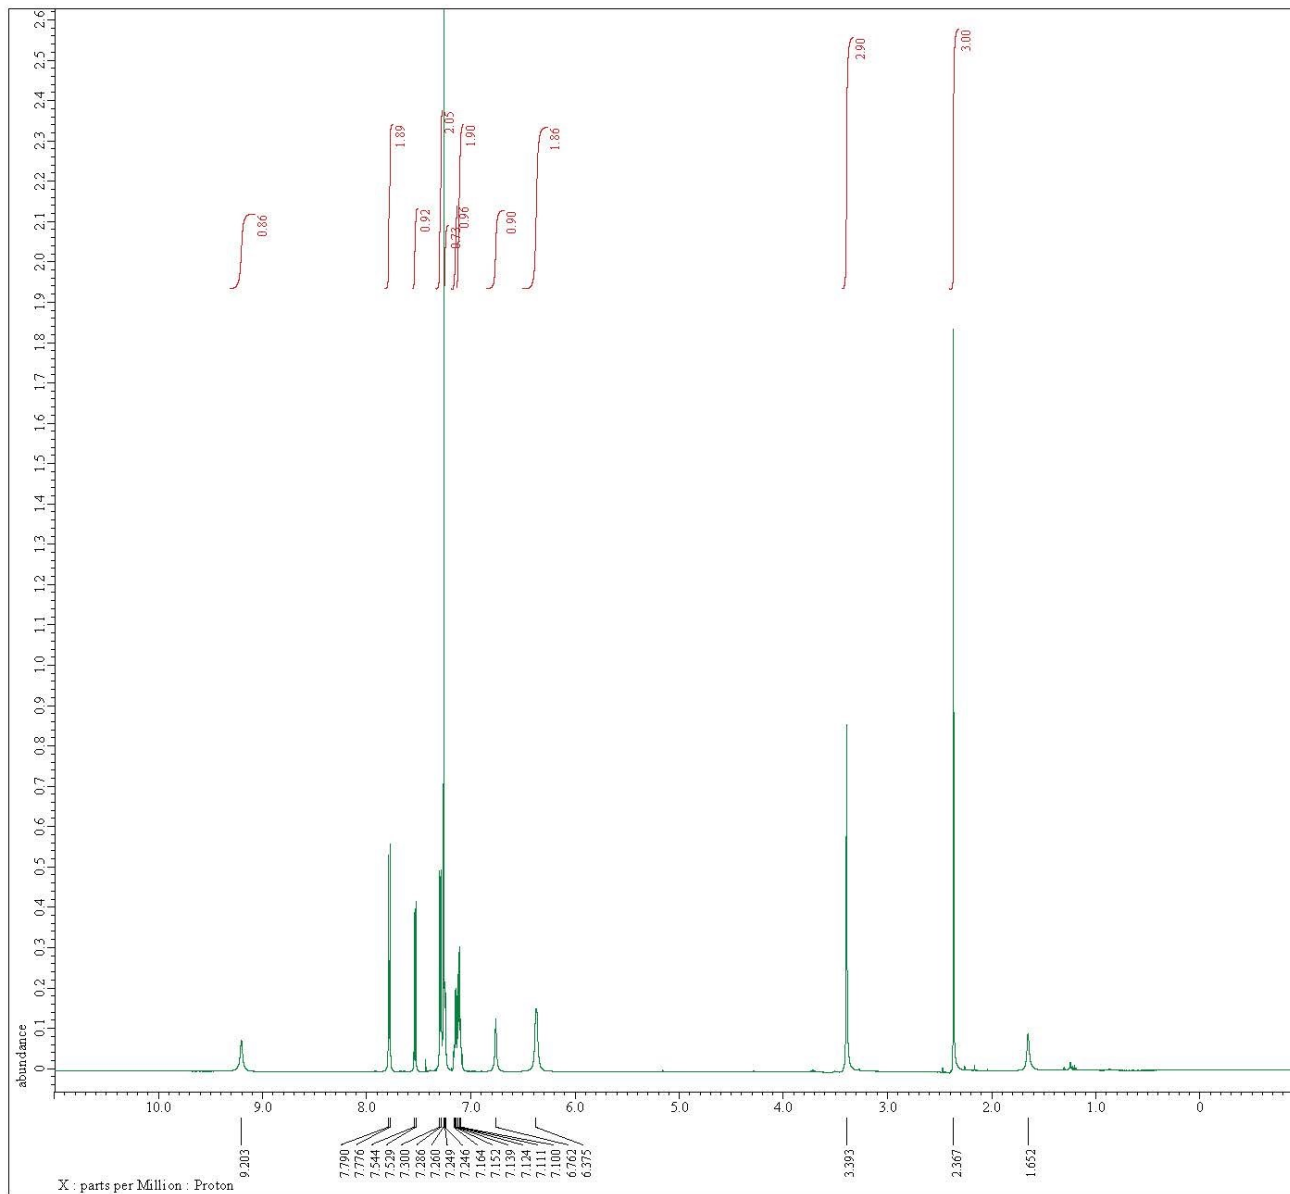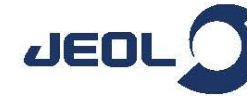

---- PROCESSING PARAMETERS ----  
 sexp ( 0.2[Hz], 0.0[s] )  
 trapzoid ( 0[Hz], 0[Hz], 80[Hz], 100[Hz] )  
 zerofill ( 1, TRUE )  
 fit ( 1, TRUE, TRUE )  
 machinphase  
 ppm

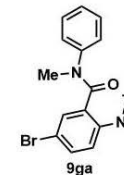

Filename = NY-1-044-5\_proton-1-3.jdf  
 Author = delta  
 Experiment = proton.jsp  
 Sample\_Id = NY-1-044-5  
 Solvent = CHLOROFORM-D  
 Actual\_Start\_Time = 23-JUN-2024 12:47:06  
 Revision\_Time = 24-JUN-2024 08:13:07

Data Format = 1D COMPLEX  
 Dia\_Size = 282.4  
 X\_Domain = Proton  
 Dia\_Title = Proton  
 Dia\_Units = (ppm)  
 Dimensions = X  
 Spectrometer = JNM-ECZ600R/S3

Field\_Strength = 14.09636928[T] (600[MHz])  
 X\_Acq\_Duration = 2.18365952[s]  
 X\_Domain = Proton  
 X\_Freq = 600.1723046[MHz]  
 X\_Offset = 5[ppm]  
 X\_Points = 32768  
 X\_Prescans = 1  
 X\_Resolution = 0.45794605[Hz]  
 X\_Sweep = 15.0060024[kHz]  
 X\_Sweep\_Clippped = 12.00480192[kHz]  
 Iir\_Domain = Proton  
 Iir\_Freq = 600.1723046[MHz]  
 Iir\_Offset = 5[ppm]  
 Tri\_Domain = Proton  
 Tri\_Freq = 600.1723046[MHz]  
 Tri\_Offset = 5[ppm]  
 Blanking = 5.0[us]  
 Clipped = FALSE  
 Scans = 4  
 Total\_Scans = 4

Relaxation\_Delay = 2[s]  
 Recvr\_Gain = 36  
 Temp\_Get = 22.1[degC]  
 X\_90\_Width = 9.9[us]  
 X\_Acq\_Time = 2.18365952[s]  
 X\_Angle = 45[deg]  
 X\_Atn = 8.1[dB]  
 X\_Pulse = 4.35[us]  
 Iir\_Mode = Off  
 Tri\_Mode = Off  
 Danta\_Loop = 200  
 Danta\_Preset = FALSE  
 Decimation\_Rate = 0  
 Initial\_Wait = 1[s]  
 Phase = (0, 90, 270, 180, 180, 270, 90, 0)  
 Preset\_Time = 2[s]  
 Preset\_Time\_Flag = FALSE  
 Relaxation\_Delay\_Calc = 0[s]  
 Relaxation\_Delay\_Temp = 2[s]  
 Repetition\_Time = 4.18365952[s]





---- PROCESSING PARAMETERS ----  
blip\_cld(15, 64, 1)  
sezp(2.0[Hz], 0.0[s])  
fit(1, TRUE, TRUE)  
machinephase  
ppm

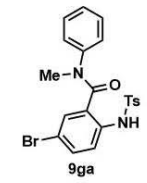

Filename = KY-1-044-5\_carbon-1-2.jdf  
Author = delta  
Experiment = carbon\_jsp  
Sample Id = KY-1-044-5  
Solvent = CHLOROFORM-D  
Actual\_Start\_Time = 23-JUN-2024 12:49:07  
Revision\_Time = 23-JUN-2024 13:29:53

Data Format = 1D COMPLEX  
Dim Size = 2624  
X\_Domain = Carbon13  
Dim Title = Carbon13  
Dim Units = (ppm)  
Dimensions = X  
Spectrometer = JNM-ECZ600R/S3

Field Strength = 14.05636928(T) (600 [MHz])  
X\_Acq\_Duration = 0.69206016[s]  
X\_Domain = Carbon13  
X\_Freq = 150.91343039 [MHz]  
X\_Offset = 100 [ppm]  
X\_Points = 32768  
X\_Prescans = 1  
X\_Resolution = 1.44496109 [Hz]  
X\_Sweep = 47.34848485 [kHz]  
X\_Sweep\_Clippped = 37.87878788 [kHz]  
Irr\_Domain = Proton  
Irr\_Freq = 600.1723046 [MHz]  
Irr\_Offset = 5 [ppm]  
Blanking = 15.0 [us]  
Clipped = FALSE  
Scans = 512  
Total\_Scans = 512

Relaxation\_Delay = 1 [s]  
Recvr\_Gain = 56  
Temp\_Cst = 22 [dC]  
X\_90\_Width = 8.1 [us]  
X\_Acq\_Time = 0.69206016 [s]  
X\_Angle = 30 [deg]  
X\_Atn = 11 [dB]  
X\_Pulse = 2.7 [us]  
Irr\_Atn\_Dec = 25.803 [dB]  
Irr\_Atn\_Dec\_Calc = 25.803 [dB]  
Irr\_Atn\_Dec\_Default\_Calc = 25.803 [dB]  
Irr\_Atn\_Noise = 25.803 [dB]  
Irr\_Dec\_Bandwidth\_Hz = 7.23684211 [kHz]  
Irr\_Dec\_Bandwidth\_Ppm = 12.05784078 [ppm]  
Irr\_Dec\_Freq = 600.1723046 [MHz]  
Irr\_Dec\_Haric\_Factor = 2.2  
Irr\_Decoupling = TRUE  
Irr\_Noise = TRUE  
Irr\_Offset\_Default = 5 [ppm]  
Irr\_Pwldch = 76 [us]  
Irr\_Pwldch\_Default = 76 [us]  
Irr\_Pwldch\_Default\_Calc = 76 [us]  
Irr\_Pwldch\_Templ = 76 [us]  
Irr\_Wurst = FALSE  
Decimation\_Rate = 0  
Initial\_Wait = 1 [s]  
Noe\_Time = 1 [s]  
Noe\_Time\_Flag = FALSE  
Relaxation\_Delay\_Calc = 0 [s]  
Relaxation\_Delay\_Temp = 1 [s]  
Repetition\_Time = 1.69206016 [s]

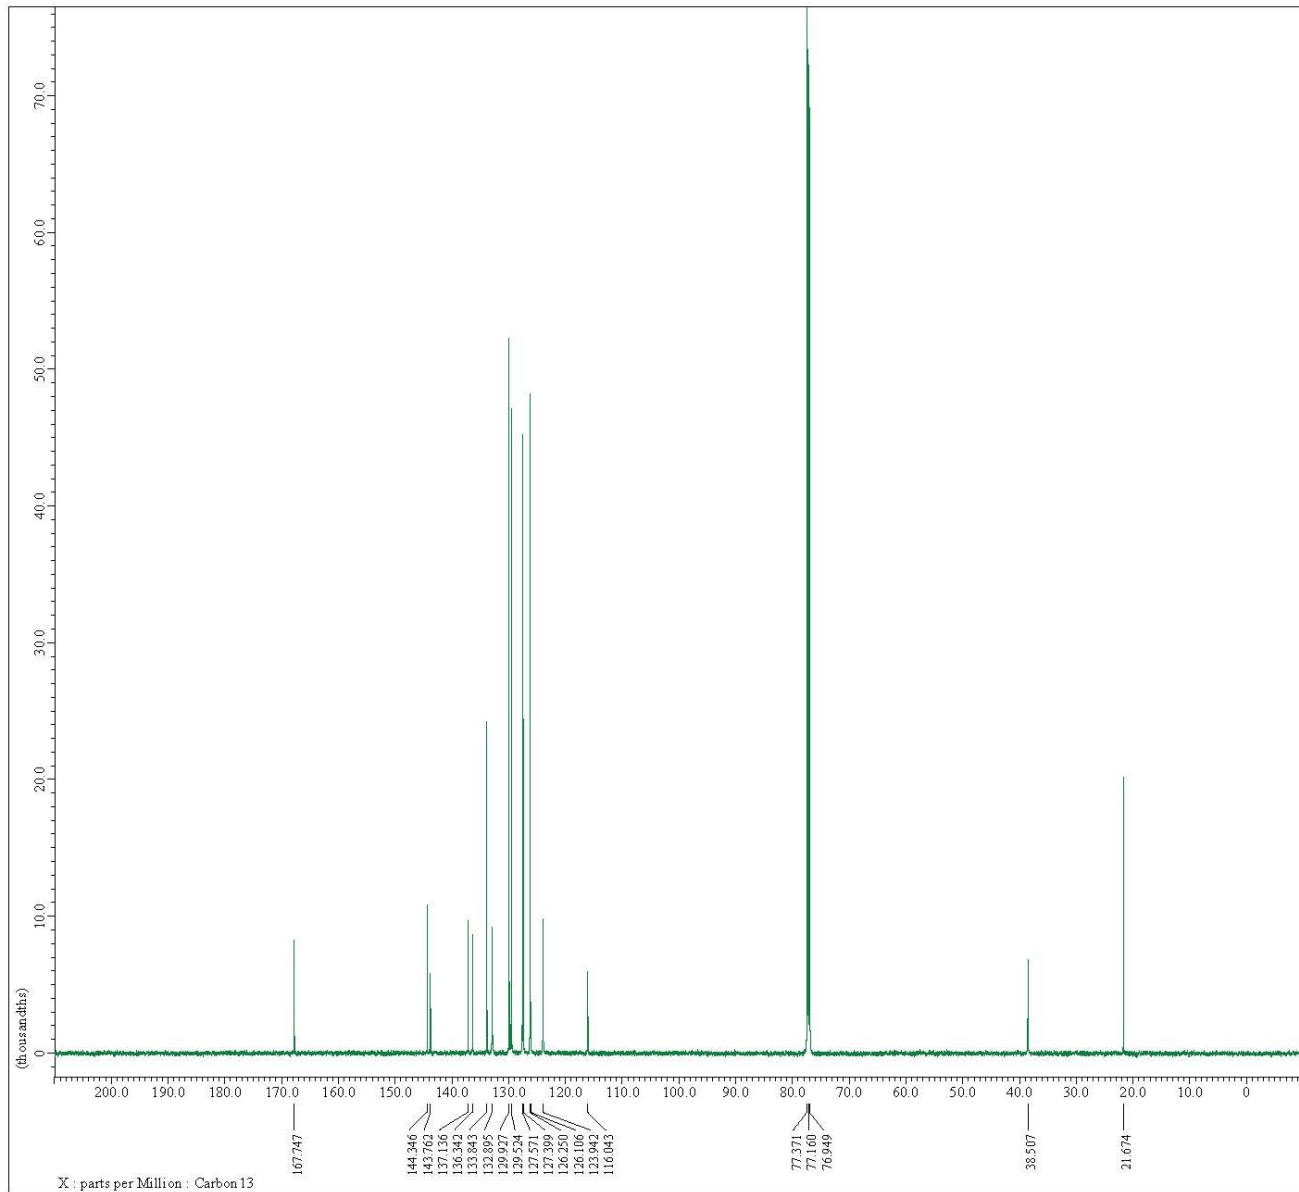



---- PROCESSING PARAMETERS ----  
sepf( 0.2[Hz], 0.0[s] )  
trapezoid( 0[Hz], 0[Hz], 80[Hz], 100[Hz] )  
zerofill( 1, TRUE )  
fft( 1, TRUE, TRUE )  
machinephase  
ppa  
chresh( 0.89666[Hz], 1, )  
base\_correct( Adams, 5, 0, FALSE, 3, None, FALSE )  
reference( 7.24987[ppm], 7.26[ppm] )  
以下由名: KV-1-024-5 proton-1-1.jdf

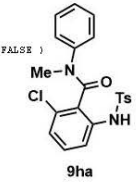

Filename = KV-1-024-5\_proton-1-3.jdf  
Author = delta  
Experiment = proton.jxp  
Sample\_id = KV-1-024-5  
Solvent = CHLOROFORM-D  
Actual\_Start\_Time = 24-JUN-2024 21:59:08  
Version\_Time = 3-JUL-2024 11:07:46  
Data\_Format = 1D REAL  
Data\_Size = 26214  
X\_Domain = Proton  
Data\_Title = Proton  
Data\_Units = (ppm)  
Dimensions = X  
Spectrometer = JNM-ECZ600R/S3  
Field\_Strength = 14.0963628[T] (600[MHz])  
X\_Acq\_Duration = 2.18365952[s]  
X\_Domain = Proton  
X\_Freq = 600.1723046[MHz]  
X\_Offset = 8[ppm]  
X\_Points = 32768  
X\_Prescans = 1  
X\_Resolution = 0.45794605[Hz]  
X\_Sweep = 15.0060024[KHz]  
X\_Sweep\_Clippped = 12.00480192[KHz]  
Irr\_Domain = Proton  
Irr\_Freq = 600.1723046[MHz]  
Irr\_Offset = 8[ppm]  
Tri\_Domain = Proton  
Tri\_Freq = 600.1723046[MHz]  
Tri\_Offset = 8[ppm]  
Blanking = 5.0[us]  
Clipped = FALSE  
Scans = 4  
Total\_Scans = 4  
Relaxation\_Delay = 2[s]  
Recvr\_Gain = 46  
Temp\_Set = 21.9[degC]  
X\_90\_Width = 9.9[us]  
X\_Acq\_Time = 2.18365952[s]  
X\_Angle = 45[deg]  
X\_Atn = 8.1[dB]  
X\_Pulse = 4.95[us]  
Irr\_Mode = Off  
Tri\_Mode = Off  
Dante\_Loop = 200  
Dante\_Preset = FALSE  
Decimation\_Rate = 0  
Initial\_Wait = 1[s]  
Phase = (0, 90, 270, 180, 180, 270, 90, 0)  
Preset\_Time = 2[s]  
Preset\_Time\_Play = FALSE  
Relaxation\_Delay\_Calc = 0[s]  
Relaxation\_Delay\_Temp = 2[s]  
Repetition\_Time = 4.18365952[s]

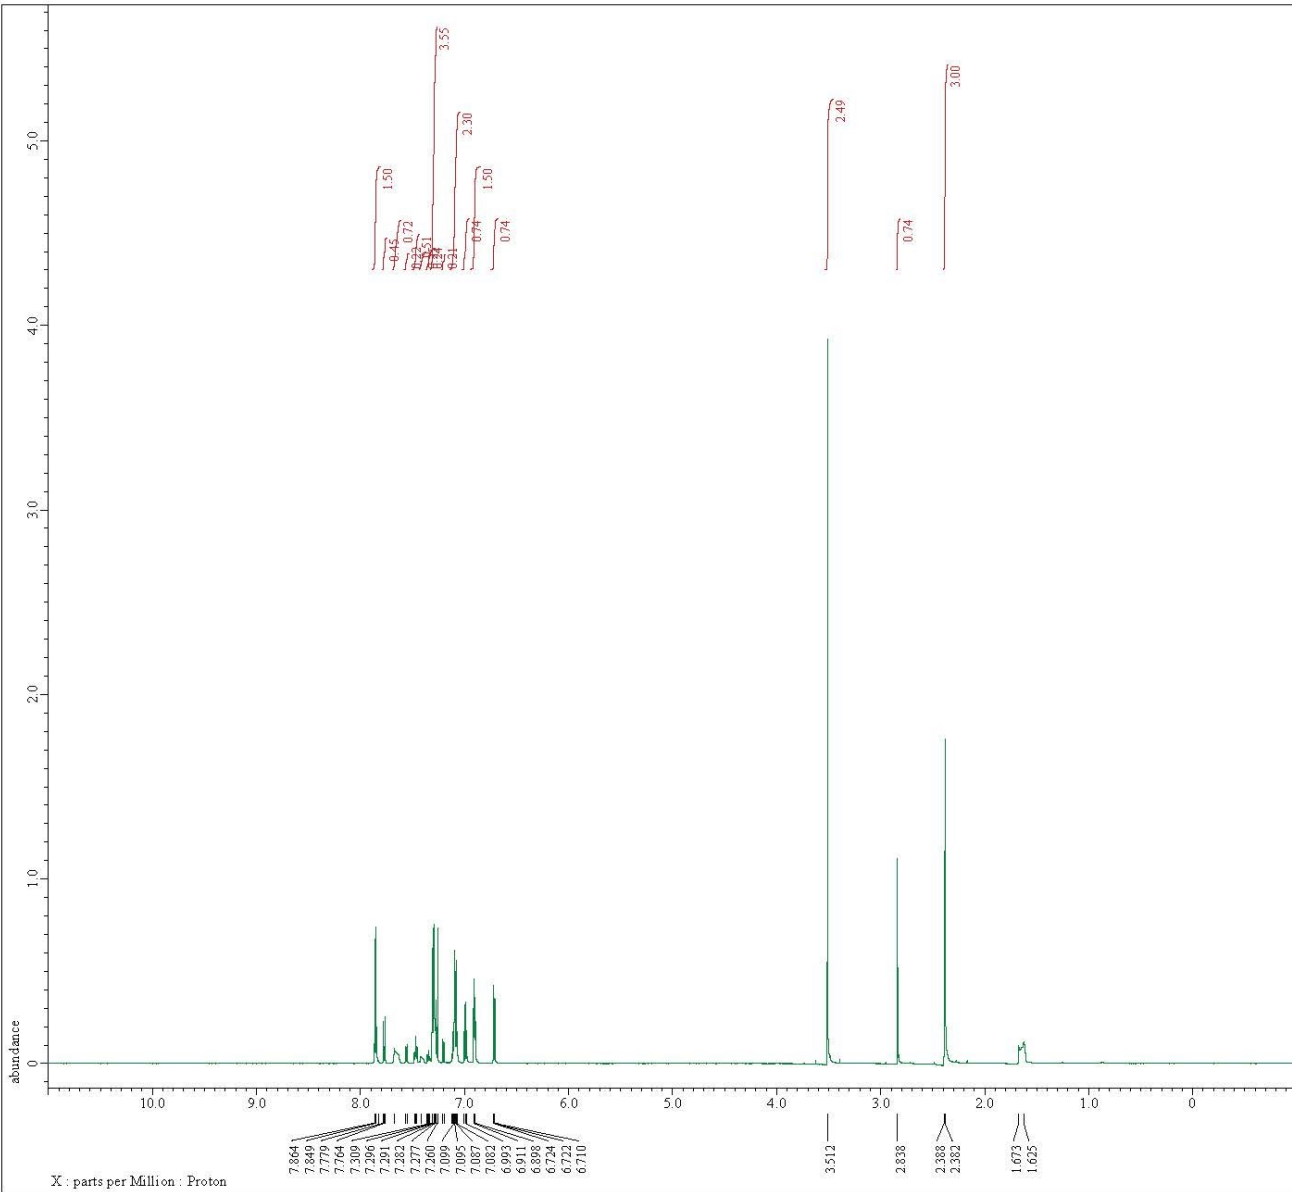



---- PROCESSING PARAMETERS ----  
blip\_cld(16, 64, 1)  
secp(2.0[Hz], 0.0[s])  
ft(1, TRUE, TRUE)  
machinephase  
ppm

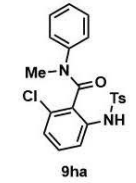

Filename = KY-1-024-5\_carbon-1-3.jdf  
Author = delta  
Experiment = carbon\_jsp  
Sample Id = KY-1-024-5  
Solvent = CHLOROFORM-D  
Actual\_Start\_Time = 24-JUN-2024 21:59:54  
Revision\_Time = 3-JUL-2024 10:29:26

Data Format = 1D COMPLEX  
Dir\_Size = 2624  
X\_Domain = Carbon13  
Dir\_Title = Carbon13  
Dir\_Units = (ppm)  
Dimensions = X  
Spectrometer = JNM-ECZ600R/S3

Field\_Strength = 14.05636928(T) (600[MHz])  
X\_Acq\_Duration = 0.69206016[s]  
X\_Domain = Carbon13  
X\_Freq = 150.91343039[MHz]  
X\_Offset = 100[ppm]  
X\_Points = 32768  
X\_Prescans = 1  
X\_Resolution = 1.44496109[Hz]  
X\_Sweep = 47.34848485[kHz]  
X\_Sweep\_Clipped = 37.87878788[kHz]  
Irr\_Domain = Proton  
Irr\_Freq = 600.1723046[MHz]  
Irr\_Offset = 5[ppm]  
Blanking = 15.0[us]  
Clipped = FALSE  
Scans = 128  
Total\_Scans = 128

Relaxation\_Delay = 1[s]  
Recvr\_Gain = 56  
Temp\_Cat = 21[dC]  
X\_90\_Width = 8.1[us]  
X\_Acq\_Time = 0.69206016[s]  
X\_Angle = 30[deg]  
X\_Atn = 11[dB]  
X\_Pulse = 2.7[us]  
Irr\_Atn\_Dec = 25.803[dB]  
Irr\_Atn\_Dec\_Calc = 25.803[dB]  
Irr\_Atn\_Dec\_Default\_Calc = 25.803[dB]  
Irr\_Dec\_Bandwidth\_Hz = 7.23684211[kHz]  
Irr\_Dec\_Bandwidth\_Ppm = 12.05794078[ppm]  
Irr\_Dec\_Freq = 600.1723046[MHz]  
Irr\_Dec\_Merit\_Factor = 2.2  
Irr\_Decoupling = SRH  
Irr\_Noise = FALSE  
Irr\_Offset\_Default = WAIT2  
Irr\_Pwidth = 76[us]  
Irr\_Pwidth\_Default = 76[us]  
Irr\_Pwidth\_Default\_Calc = 76[us]  
Irr\_Pwidth\_Templ = 76[us]  
Irr\_Wurst = FALSE  
Denatation\_Rate = 0  
Initial\_Wait = 1[s]  
Noe\_Time = 1[s]  
Noe\_Time\_Play = FALSE  
Relaxation\_Delay\_Calc = 0[s]  
Relaxation\_Delay\_Temp = 1[s]  
Repetition\_Time = 1.69206016[s]

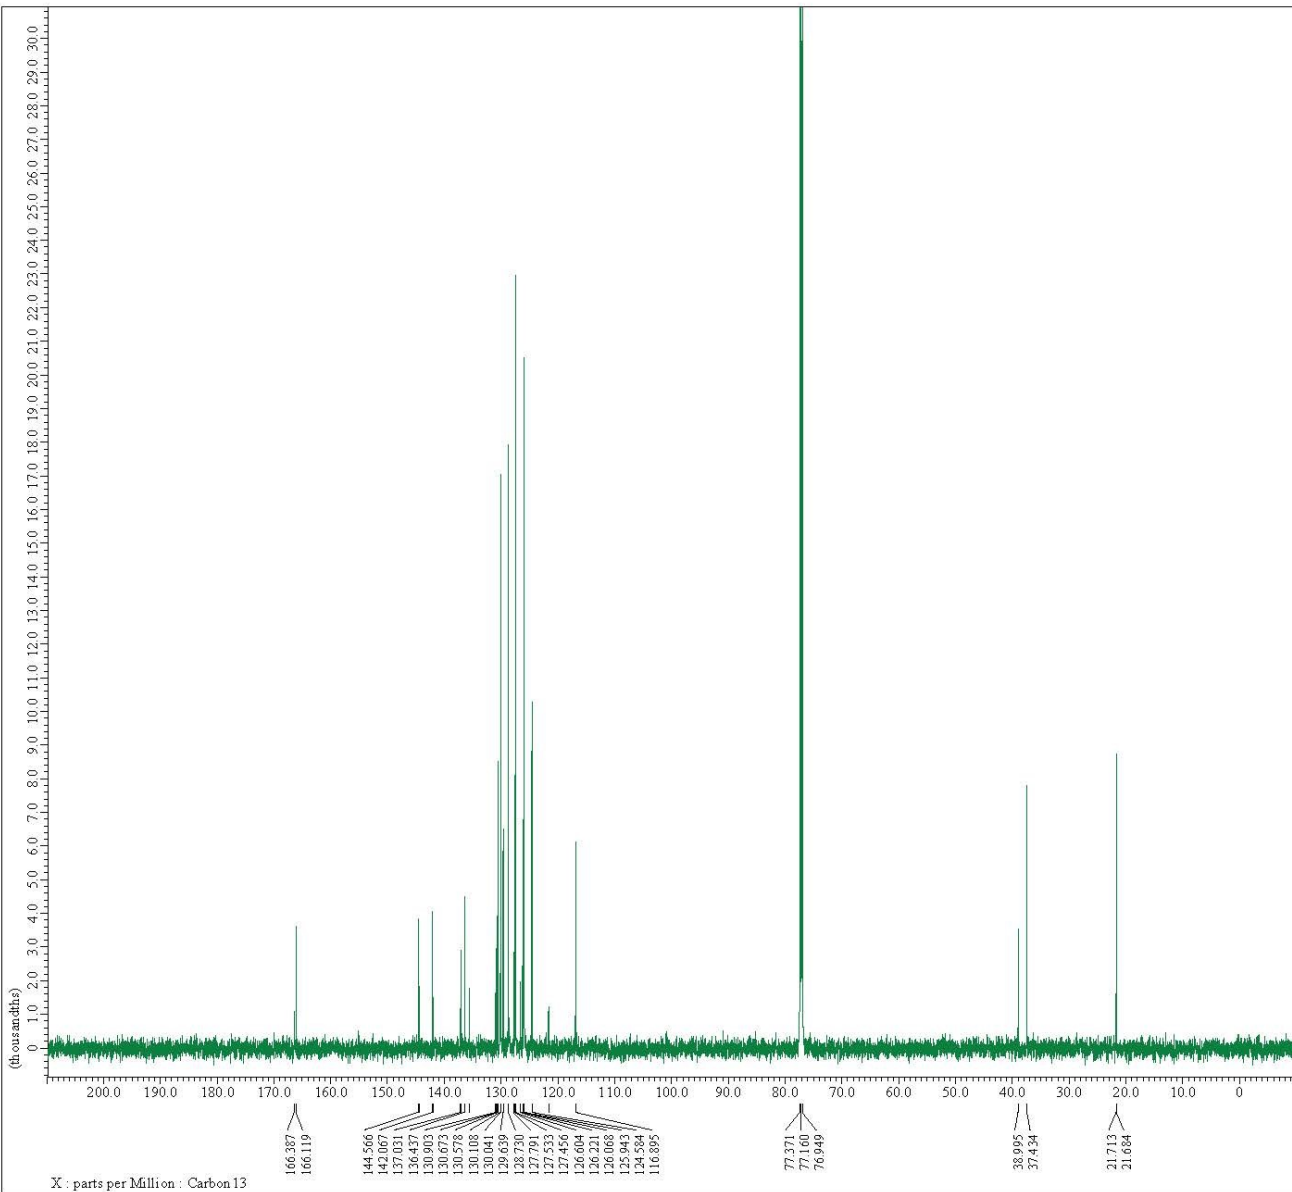

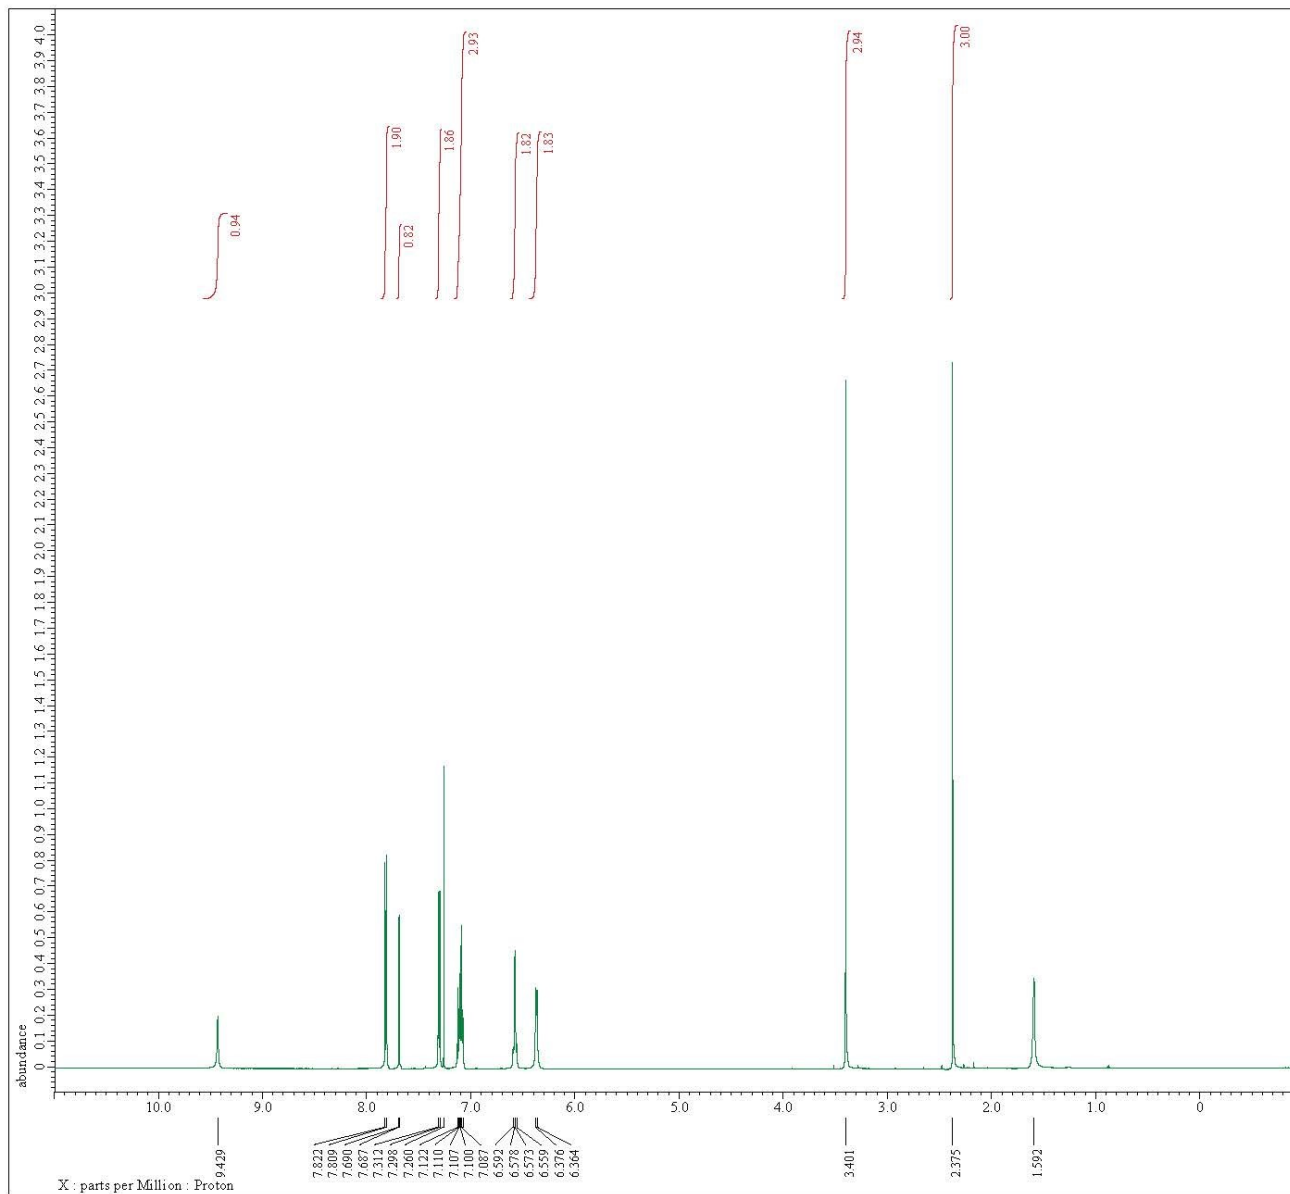

JEOL

---- PROCESSING PARAMETERS ----  
 sexp ( 0.2[Hz], 0.0[s] )  
 trapasoid ( 0[Hz], 0[Hz], 80[Hz], 100[Hz] )  
 zerofill ( 1, TRUE )  
 fit ( 1, TRUE, TRUE )  
 machinphase  
 ppm

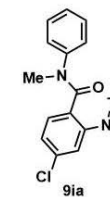

Filename = NY-1-047-5-proton-1-3.jdf  
 Author = delta  
 Experiment = proton.jpg  
 Sample Id = NY-1-047-5  
 Solvent = CHLOROFORM-D  
 Actual\_Start\_Time = 23-JUN-2024 13:10:23  
 Revision\_Time = 9-JUL-2024 11:14:51

Data Format = 1D COMPLEX  
 Dia\_Size = 282.4  
 X\_Domain = Proton  
 Dia\_Title = Proton  
 Dia\_Units = (ppm)  
 Dimensions = X  
 Spectrometer = JNM-ECZ600R/S3

Field Strength = 14.09636928[T] (600[MHz])  
 X\_Acq\_Duration = 2.18365952[s]  
 X\_Domain = Proton  
 X\_Freq = 600.1723046[MHz]  
 X\_Offset = 5[ppm]  
 X\_Points = 32768  
 X\_Prescans = 1  
 X\_Resolution = 0.45794605[Hz]  
 X\_Sweep = 15.0060024[kHz]  
 X\_Sweep\_Clippped = 12.00480192[kHz]  
 Itr\_Domain = Proton  
 Itr\_Freq = 600.1723046[MHz]  
 Itr\_Offset = 5[ppm]  
 Tri\_Domain = Proton  
 Tri\_Freq = 600.1723046[MHz]  
 Tri\_Offset = 5[ppm]  
 Blanking = 5.0[us]  
 Clipped = FALSE  
 Scans = 4  
 Total\_Scans = 4

Relaxation\_Delay = 2[s]  
 Recvr\_Gain = 46  
 Temp\_Get = 21.41[dC]  
 X\_90\_Width = 9.9[us]  
 X\_Acq\_Time = 2.18365952[s]  
 X\_Angle = 45[deg]  
 X\_Atn = 8.11[dB]  
 X\_Pulse = 4.35[us]  
 Itr\_Mode = Off  
 Tri\_Mode = Off  
 Danta\_Loop = 200  
 Danta\_Preset = FALSE  
 Decimation\_Rate = 0  
 Initial\_Wait = 1[s]  
 Phase = (0, 90, 270, 180, 180, 270, 90, 0)  
 Preset\_Time = 2[s]  
 Preset\_Time\_Flag = FALSE  
 Relaxation\_Delay\_Calc = 0[s]  
 Relaxation\_Delay\_Temp = 2[s]  
 Repetition\_Time = 4.18365952[s]



---- PROCESSING PARAMETERS ----  
blip\_cld(15, 64, 1)  
sezp(2.0[Hz], 0.0[s])  
fit(1, TRUE, TRUE)  
machinephase  
ppm

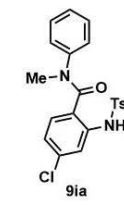

Filename = KY-1-047-5\_carbon-1-2.jdf  
Author = delta  
Experiment = carbon\_jsp  
Sample Id = KY-1-047-5  
Solvent = CHLOROFORM-D  
Actual\_Start\_Time = 23-JUN-2024 13:12:23  
Revision\_Time = 23-JUN-2024 13:31:28

Data Format = 1D COMPLEX  
Dir\_Size = 2624  
X\_Domain = Carbon13  
Dir\_Title = Carbon13  
Dir\_Units = (ppm)  
Dimensions = X  
Spectrometer = JNM-ECZ600R/S3

Field\_Strength = 14.05636928[T] (600[MHz])  
X\_Acq\_Duration = 0.69206016[s]  
X\_Domain = Carbon13  
X\_Freq = 150.91343039[MHz]  
X\_Offset = 100[ppm]  
X\_Points = 32768  
X\_Prescans = 1  
X\_Resolution = 1.44496109[Hz]  
X\_Sweep = 47.34848485[kHz]  
X\_Sweep\_Clippped = 37.87878788[kHz]  
Irr\_Domain = Proton  
Irr\_Freq = 600.1723046[MHz]  
Irr\_Offset = 5[ppm]  
Blanking = 15.0[us]  
Clipped = FALSE  
Scans = 256  
Total\_Scans = 256

Relaxation\_Delay = 1[s]  
Recvr\_Gain = 55  
Temp\_Gct = 21.3[dC]  
X\_90\_Width = 8.1[us]  
X\_Acq\_Time = 0.69206016[s]  
X\_Angle = 30[deg]  
X\_Atn = 11[dB]  
X\_Pulse = 2.7[us]  
Irr\_Atn\_Dec = 25.803[dB]  
Irr\_Atn\_Dec\_Calc = 25.803[dB]  
Irr\_Atn\_Dec\_Default\_Calc = 25.803[dB]  
Irr\_Atn\_Noise = 25.803[dB]  
Irr\_Dec\_Bandwidth\_Hz = 7.23684211[kHz]  
Irr\_Dec\_Bandwidth\_Ppm = 12.05784078[ppm]  
Irr\_Dec\_Freq = 600.1723046[MHz]  
Irr\_Dec\_Haric\_Factor = 2.2  
Irr\_Decoupling = TRUE  
Irr\_Noise = TRUE  
Irr\_Offset\_Default = 5[ppm]  
Irr\_Pwldch = 76[us]  
Irr\_Pwldch\_Default = 76[us]  
Irr\_Pwldch\_Default\_Calc = 76[us]  
Irr\_Pwldch\_Templ = 76[us]  
Irr\_Thurst = FALSE  
Decimation\_Rate = 0  
Initial\_Wait = 1[s]  
Noe\_Time = 1[s]  
Noe\_Time\_Flag = FALSE  
Relaxation\_Delay\_Calc = 0[s]  
Relaxation\_Delay\_Temp = 1[s]  
Repetition\_Time = 1.69206016[s]

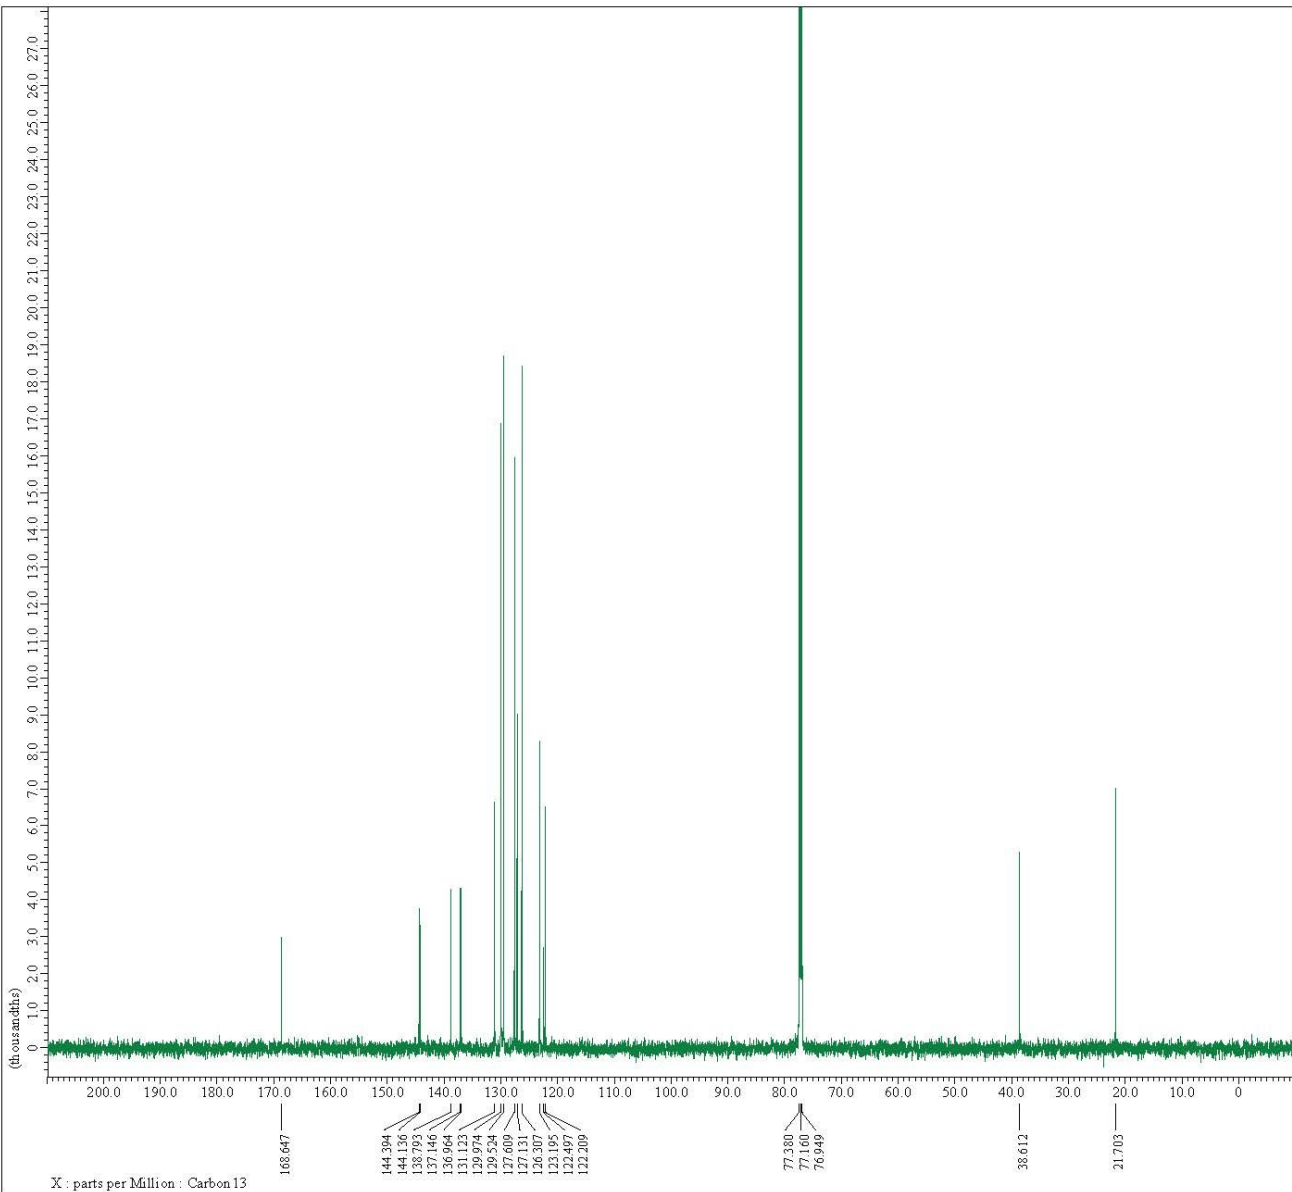

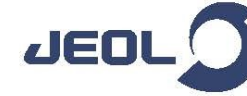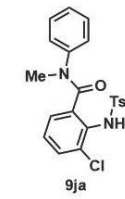

---- PROCESSING PARAMETERS ----

sexp( 0.2[Hz], 0.0[s] )  
trapezoid( 0[%], 0[%], 80[%], 100[%] )  
zerofill( 1, TRUE )  
fft( 1, TRUE, TRUE )  
machinphase  
ppa

Filename = TW-6-151-2-1\_proton-1-3.jdf  
Author = delta  
Experiment = proton.jxp  
Sample\_id = TW-6-151-2-1  
Solvent = CHLOROFORM-D  
Actual\_Start\_Time = 26-JUN-2024 22:44:36  
Revision\_Time = 27-JUN-2024 08:02:01

Data Format = 1D COMPLEX  
Data Size = 26214  
X\_Domain = Proton  
Data Title = Proton  
Data Units = (ppm)  
Dimensions = X  
Spectrometer = JNM-EZ600R/S3

Field Strength = 14.09636928[T] (600[MHz])  
X\_AcqDuration = 2.91110912[s]  
X\_Domain = Proton  
X\_Freq = 600.1723046[MHz]  
X\_Offset = 5[ppm]  
X\_Points = 32768  
X\_Prescans = 1  
X\_Resolution = 0.34351169[Hz]  
X\_Sweep = 11.2561909[kHz]  
X\_Sweep\_Clippped = 9.00495272[kHz]  
Irr\_Domain = Proton  
Irr\_Freq = 600.1723046[MHz]  
Irr\_Offset = 5[ppm]  
Tri\_Domain = Proton  
Tri\_Freq = 600.1723046[MHz]  
Tri\_Offset = 5[ppm]  
Blanking = 5.0[us]  
Clipped = FALSE  
Scans = 4  
Total\_Scans = 4

Relaxation\_Delay = 2[s]  
Recvr Gain = 46  
Temp Det = 20.9[degC]  
X\_90Pulse = 9.9[us]  
X\_Acq Time = 2.91110912[s]  
X\_Angle = 45[deg]  
X\_Atn = 8.1[dB]  
X\_Pulse = 4.95[us]  
Irr\_Mode = Off  
Tri\_Mode = Off  
Dante Loop = 200  
Dante\_Preset = FALSE  
Decimation\_Rate = 0  
Initial\_Wait = 1[s]  
Phase = (0, 90, 270, 180, 180, 270, 90, 0)  
Preset\_Time = 2[s]  
Preset\_Time\_Play = FALSE  
Relaxation\_Delay\_Calc = 0[s]  
Relaxation\_Delay\_Temp = 2[s]  
Repetition\_Time = 4.91110912[s]

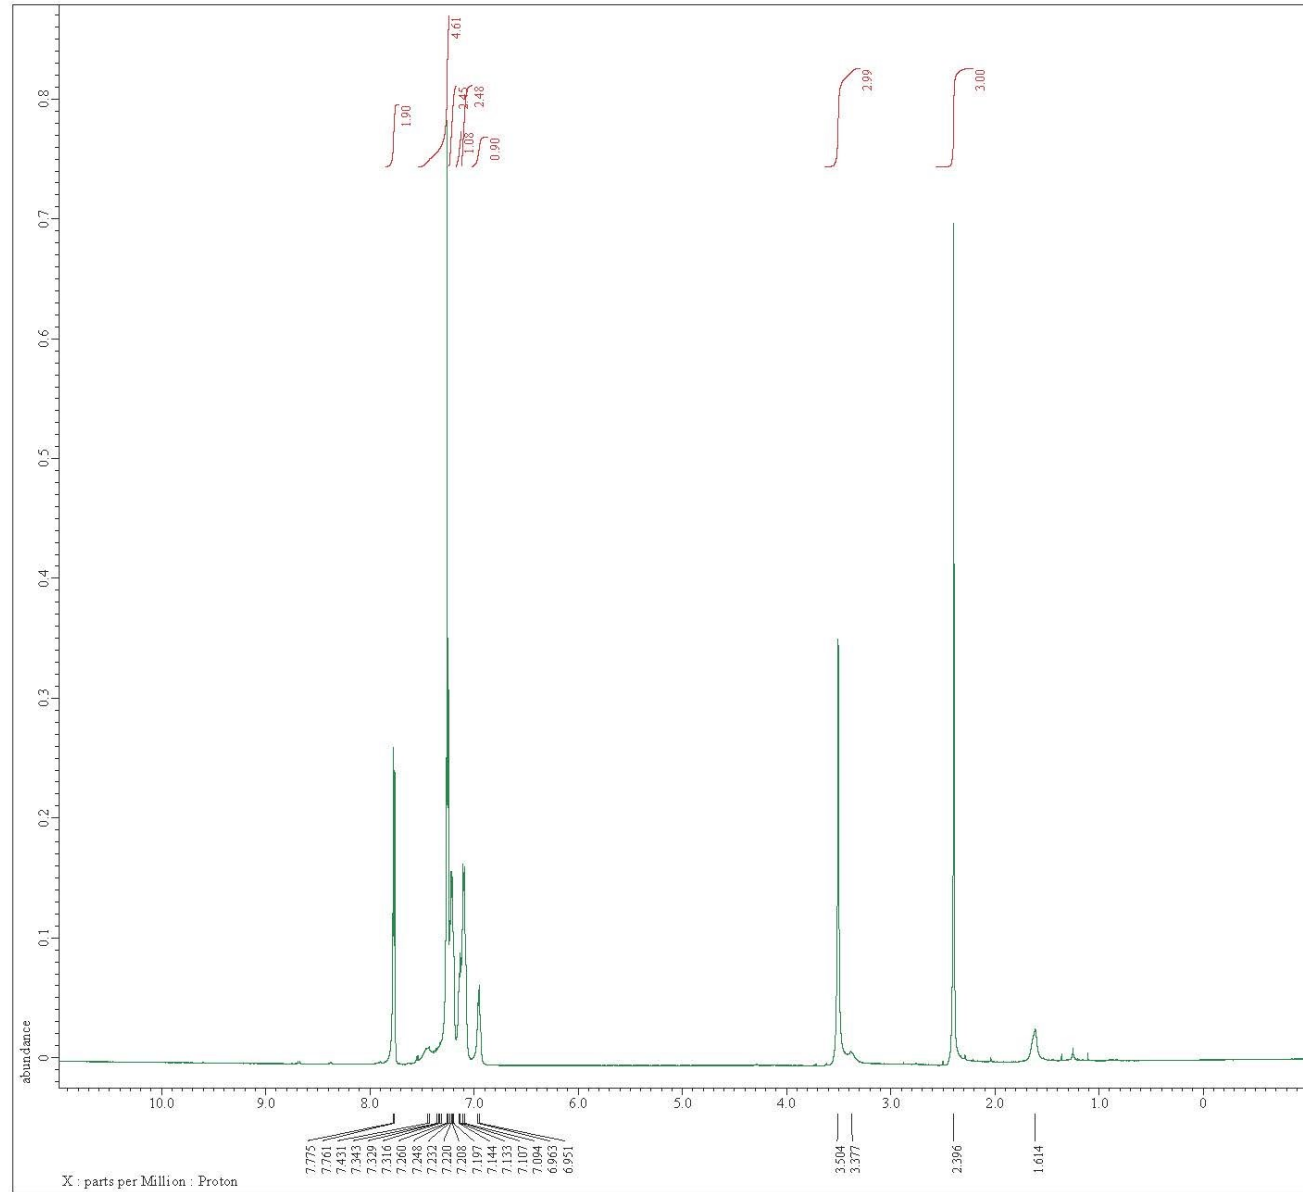

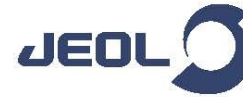

---- PROCESSING PARAMETERS ----  
blip\_cld(15, 64, 1)  
sezp(2.0[Hz], 0.0[s])  
ft(1, TRUE, TRUE)  
machinphase  
ppm

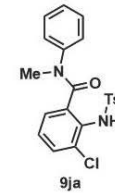

Filename = JK-6-151-2-2\_carbon-1-3.jdf  
Author = delta  
Experiment = carbon\_jsp  
Sample Id = JK-6-151-2-2  
Solvent = CHLOROFORM-D  
Actual\_Start\_Time = 26-JUN-2024 22:40:37  
Revision\_Time = 27-JUN-2024 08:05:02

Data Format = 1D COMPLEX  
Dim Size = 2624  
X\_Domain = Carbon13  
Dim Title = Carbon13  
Dim Units = (ppm)  
Dimensions = X  
Spectrometer = JNM-ECZ600R/S3

Field\_Strength = 14.05636928(T) (600[MHz])  
X\_Acq\_Duration = 0.69206016[s]  
X\_Domain = Carbon13  
X\_Freq = 150.91343039[MHz]  
X\_Offset = 100[ppm]  
X\_Points = 32768  
X\_Prescans = 1  
X\_Resolution = 1.44496109[Hz]  
X\_Sweep = 47.34848485[kHz]  
X\_Sweep\_Clippped = 37.87878788[kHz]  
Irr\_Domain = Proton  
Irr\_Freq = 600.1723046[MHz]  
Irr\_Offset = 5[ppm]  
Blanking = 15.0[us]  
Clipped = FALSE  
Scans = 32  
Total\_Scans = 32

Relaxation\_Delay = 1[s]  
Recvr\_Gain = 55  
Temp\_Gct = 20.9[dC]  
X\_90\_Width = 8.1[us]  
X\_Acq\_Time = 0.69206016[s]  
X\_Angle = 30[deg]  
X\_Atn = 11[dB]  
X\_Pulse = 2.7[us]  
Irr\_Atn\_Dec = 25.803[dB]  
Irr\_Atn\_Dec\_Calc = 25.803[dB]  
Irr\_Atn\_Dec\_Default\_Calc = 25.803[dB]  
Irr\_Dec\_Bandwidth\_Hz = 7.23684211[kHz]  
Irr\_Dec\_Bandwidth\_Ppm = 12.05794078[ppm]  
Irr\_Dec\_Freq = 600.1723046[MHz]  
Irr\_Dec\_Merit\_Factor = 2.2  
Irr\_Decoupling = TRUE  
Irr\_Noise = FALSE  
Irr\_Noise = WALTZ  
Irr\_Offset\_Default = 5[ppm]  
Irr\_Width = 76[us]  
Irr\_Width\_Default = 76[us]  
Irr\_Width\_Default\_Calc = 76[us]  
Irr\_Width\_Templ = 76[us]  
Irr\_Wurst = FALSE  
Destination\_Rate = 0  
Initial\_Wait = 1[s]  
Noe\_Time = 1[s]  
Noe\_Time\_Play = FALSE  
Relaxation\_Delay\_Calc = 0[s]  
Relaxation\_Delay\_Temp = 1[s]  
Repetition\_Time = 1.69206016[s]

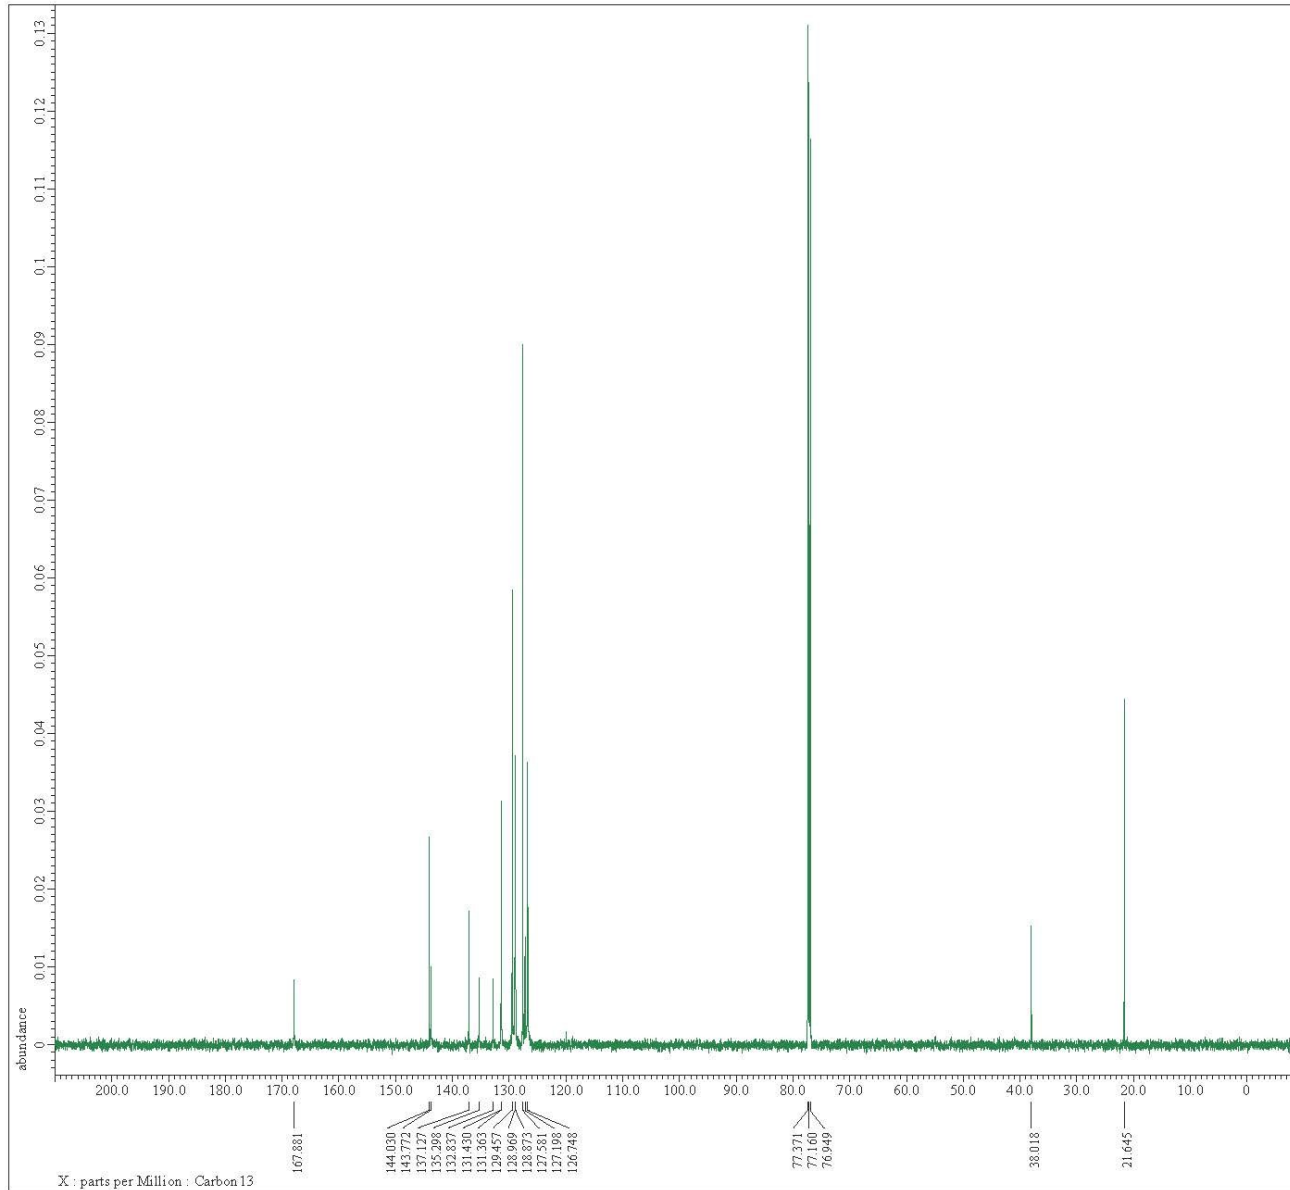

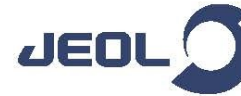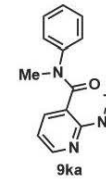

---- PROCESSING PARAMETERS ----  
sexp( 0.2[MHz], 0.0[s] )  
trapezoid( 0[Hz], 0[Hz], 80[Hz], 100[Hz] )  
zerofill( 1, TRUE )  
fft( 1, TRUE, TRUE )  
machinphase  
ppm

Filename = TR-6-149-3\_proton-1-3.jdf  
Author = delta  
Experiment = proton.jsp  
Sample\_Id = TR-6-149-3  
Solvent = CHLOROFORM-D  
Actual\_Start\_Time = 26-JUN-2024 21:28:19  
Revision\_Time = 26-JUN-2024 08:53:53

Data Format = 1D COMPLEX  
Dim Size = 26214  
X\_Domain = Proton  
Dim Title = Proton  
Dim Units = (ppm)  
Dimensions = X  
Spectrometer = JNM-ECZ600R/S3

Field Strength = 14.09636928[T] (600[MHz])  
X\_Acq\_Duration = 2.18365952[s]  
X\_Domain = Proton  
X\_Freq = 600.1723046[MHz]  
X\_Offset = 8[ppm]  
X\_Points = 32768  
X\_Prescans = 1  
X\_Resolution = 0.45794605[Hz]  
X\_Sweep = 15.0050024[kHz]  
X\_Sweep\_Clippped = 12.00480192[kHz]  
Irr\_Domain = Proton  
Irr\_Freq = 600.1723046[MHz]  
Irr\_Offset = 8[ppm]  
Tri\_Domain = Proton  
Tri\_Freq = 600.1723046[MHz]  
Tri\_Offset = 8[ppm]  
Blanking = 5.0[us]  
Clipped = FALSE  
Scans = 4  
Total\_Scans = 4

Relaxation\_Delay = 2[s]  
Recvr\_Gain = 36  
Temp\_Get = 21.1[degC]  
X\_90\_Width = 9.9[us]  
X\_Acq\_Time = 2.18365952[s]  
X\_Angle = 45[deg]  
X\_Atn = 8.1[deg]  
X\_Pulse = 4.25[us]  
Irr\_Mode = Off  
Tri\_Mode = Off  
Danta\_Loop = 200  
Danta\_Preset = FALSE  
Decimation\_Rate = 0  
Initial\_Wait = 1[s]  
Phase = (0, 90, 270, 180, 180, 270, 90, 0)  
Preset\_Time = 2[s]  
Preset\_Time\_Play = FALSE  
Relaxation\_Delay\_Calc = 0[s]  
Relaxation\_Delay\_Temp = 2[s]  
Repetition\_Time = 4.18365952[s]

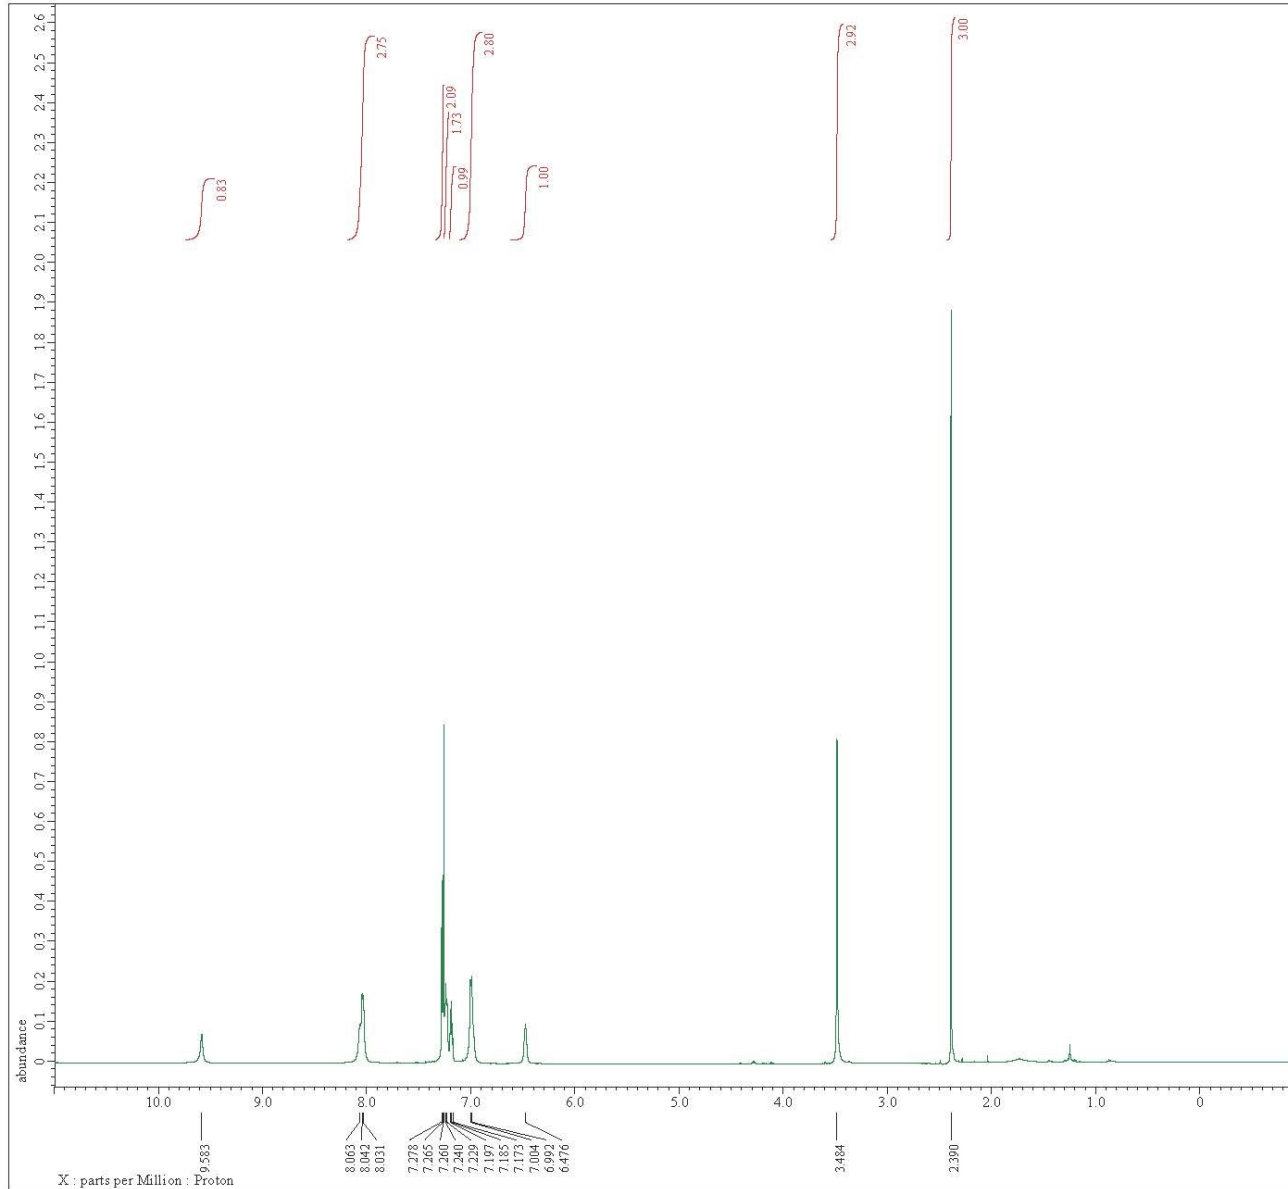



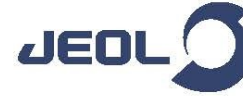

---- PROCESSING PARAMETERS ----  
blip\_cld(16, 64, 1)  
sexp(2.0[Hz], 0.0[s])  
fft(1, TRUE, TRUE)  
machinephase  
ppm

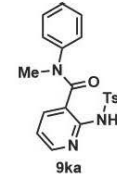

Filename = TK-6-149-3\_carbon-1-2\_jdf  
Author = delta  
Experiment = carbon\_jsp  
Sample\_id = TK-6-149-3  
Solvent = CHLOROFORM-D  
Actual\_Start\_Time = 25-JUN-2024 21:30:19  
Revision\_Time = 25-JUN-2024 21:36:27

Data Format = 1D COMPLEX  
Data Size = 26214  
X\_Domain = Carbon13  
Data Title = Carbon13  
Data Units = [ppm]  
Dimensions = X  
Spectrometer = JNM-ECZ600R/S3

Field Strength = 14.09636928[T] (600 [MHz])  
X\_Acq\_Duration = 0.69206016[s]  
X\_Domain = Carbon13  
X\_Freq = 150.91343039 [MHz]  
X\_Offset = 100 [ppm]  
X\_Points = 32768  
X\_Prescans = 1  
X\_Resolution = 1.44496109 [Hz]  
X\_Sweep = 47.34848485 [kHz]  
X\_Sweep\_Clippped = 37.87878788 [kHz]  
Irr\_Domain = proton  
Irr\_Freq = 600.1723046 [MHz]  
Irr\_Offset = 5 [ppm]  
Blanking = 15.0 [us]  
Clipped = FALSE  
Scans = 256  
Total\_Scans = 256

Relaxation\_Delay = 1 [s]  
Recvr\_Gain = 56  
Temp\_Dec = 21.3 [dC]  
X\_90\_Width = 0.11 [us]  
X\_Acq\_Time = 0.69206016 [s]  
X\_Angle = 30 [deg]  
X\_Am = 11 [dB]  
X\_Pulse = 2.7 [us]  
Irr\_Am\_Dec = 25.803 [dB]  
Irr\_Am\_Dec\_Calc = 25.803 [dB]  
Irr\_Am\_Dec\_Default\_Calc = 25.803 [dB]  
Irr\_Dec\_Bandwidth\_Hz = 7.23684211 [kHz]  
Irr\_Dec\_Bandwidth\_Ppm = 12.05794079 [ppm]  
Irr\_Dec\_Freq = 600.1723046 [MHz]  
Irr\_Dec\_Merit\_Factor = 2.2  
Irr\_Decoupling = TRUE  
Irr\_Noise = FALSE  
Irr\_Noise = WALTZ  
Irr\_Offset\_Default = 5 [ppm]  
Irr\_Pw\_dth = 76 [us]  
Irr\_Pw\_dth\_Default = 76 [us]  
Irr\_Pw\_dth\_Default\_Calc = 76 [us]  
Irr\_Pw\_dth\_Templ = 76 [us]  
Irr\_Wurst = FALSE  
Destination\_Rate = 0  
Initial\_Wait = 1 [s]  
Noe\_Time = 1 [s]  
Noe\_Time\_Play = FALSE  
Relaxation\_Delay\_Calc = 0 [s]  
Relaxation\_Delay\_Temp = 1 [s]  
Repetition\_Time = 1.69206016 [s]

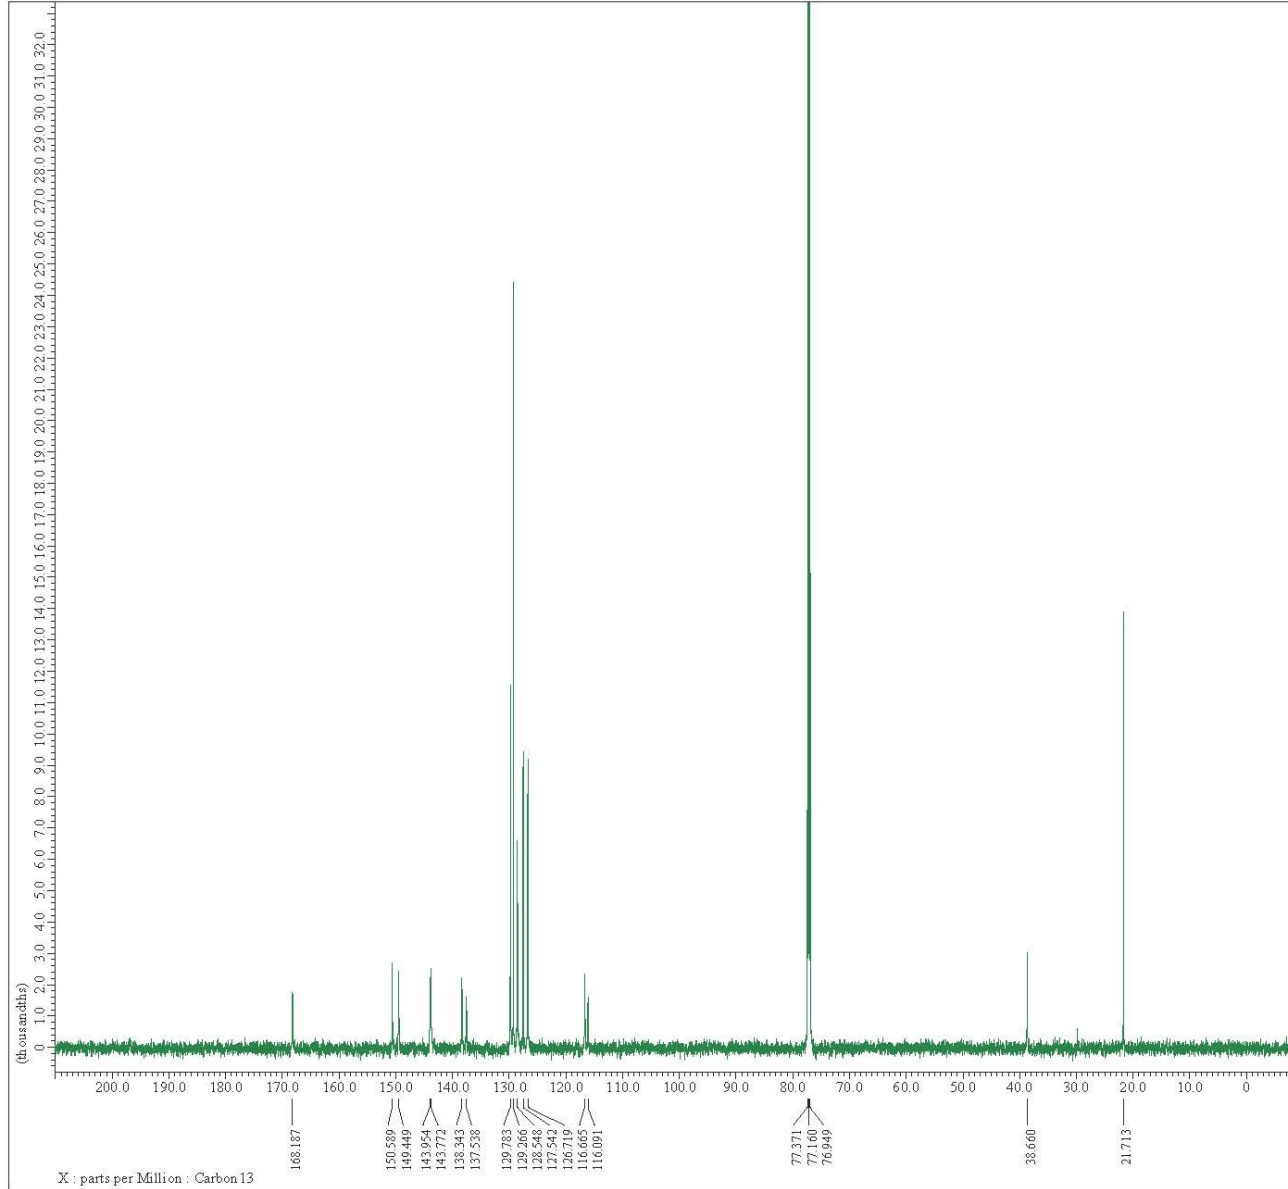

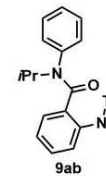

---- PROCESSING PARAMETERS ----  
sexp( 0.2[Hz], 0.0[s] )  
trapacid( 0[Hz], 0[Hz], 80[Hz], 100[Hz] )  
zerofill( 1, TRUE )  
fft( 1, TRUE, TRUE )  
machinephase  
ppm

Filename = NV-1-033-1\_proton-1-3.jdf  
Author = delta  
Experiment = proton.jsp  
Sample\_Id = NV-1-033-1  
Solvent = CHLOROFORM-D  
Actual\_Start\_Time = 24-APR-2024 10:42:29  
Revision\_Time = 24-APR-2024 14:35:58  
Comment = single pulse  
Data\_Format = 1D COMPLEX  
Dim\_Size = 26214  
X\_Domain = Proton  
Y\_Domain = Proton  
X\_Offset = 5[ppm]  
X\_Points = 32768  
X\_Fscans = 1  
X\_Resolution = 0.34428676 [Hz]  
X\_Sweep = 11.28158845 [kHz]  
X\_Sweep\_Clipped = 9.02527076 [kHz]  
F1q\_Domain = Proton  
F1q\_Freq = 600.1723046 [MHz]  
F1q\_Offset = 5[ppm]  
Tri\_Domain = Proton  
Tri\_Freq = 600.1723046 [MHz]  
Tri\_Offset = 5[ppm]  
Blanking = 5.0[us]  
Clipped = FALSE  
Scans = 4  
Total\_Scans = 4  
Relaxation\_Delay = 10[s]  
Recvr\_Gain = 26  
Temp\_Set = 22.5[degC]  
X\_90\_Pulse = 9.9[us]  
X\_Acq\_Time = 2.90455552[s]  
X\_Angle = 45[deg]  
X\_Arc = 8.1[deg]  
X\_Pulse = 4.95[us]  
F1q\_Mode = Off  
Tri\_Mode = Off  
Dante\_Loop = 1000  
Dante\_Preset = FALSE  
Decimation\_Rate = 0  
Initial\_Wait = 1[s]  
Phase = ( 0, 90, 270, 180, 180, 270, 90, 0 )  
Preset\_Time = 10[s]  
Preset\_Time\_Flag = FALSE  
Relaxation\_Delay\_Calc = 0[s]  
Relaxation\_Delay\_Temp = 10[s]  
Repetition\_Time = 12.90455552[s]

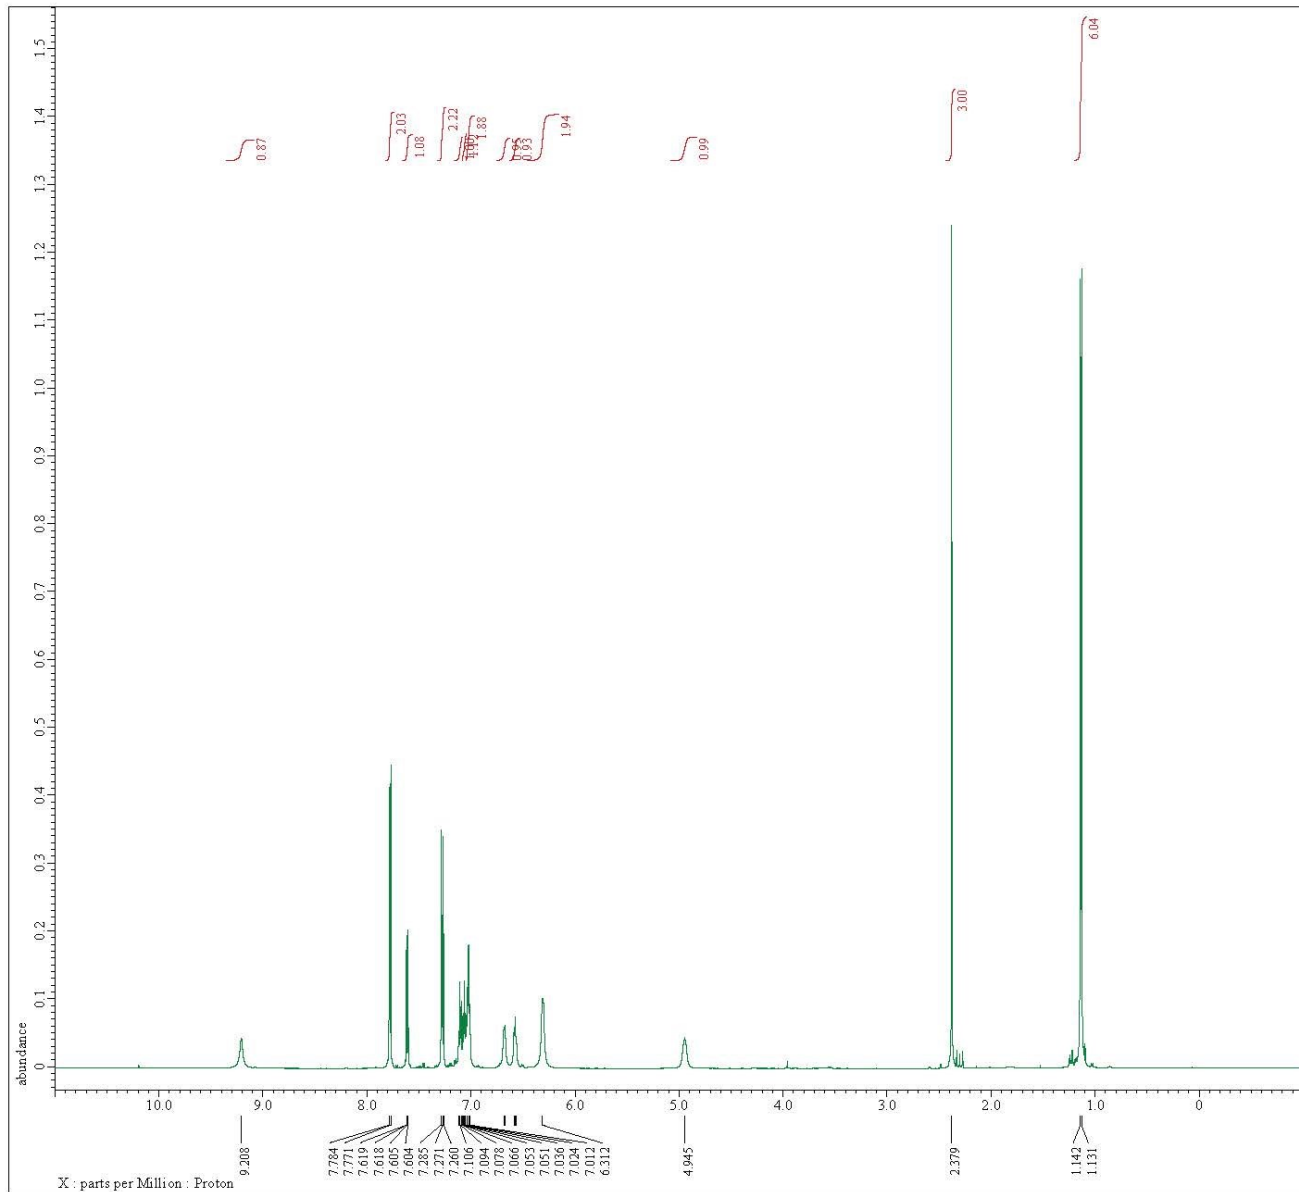



---- PROCESSING PARAMETERS ----  
blip\_cld(15, 64, 1)  
sezp(2.0[Hz], 0.0[s])  
fit(1, TMR, TRUE)  
machinephase  
ppm

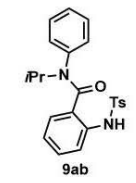

Filename = KY-1-039-1\_carbon-1-2.jdf  
Author = delta  
Experiment = carbon\_jsp  
Sample Id = KY-1-039-1  
Solvent = CHLOROFORM-D  
Actual\_Start\_Time = 24-APR-2024 10:44:08  
Revision\_Time = 24-APR-2024 10:45:59

Comment = single pulse decoupled gated NOE  
Data\_Format = 1D COMPLEX  
Dim\_Size = 26214  
X\_Domain = Carbon13  
Y\_Domain = Carbon13  
Dim\_Units = [ppm]  
Dimensions = X  
Spectrometer = JNM-EC2600R/S3

Field\_Strength = 14.09636328[T] (600[MHz])  
X\_Acq\_Duration = 0.69206016[s]  
X\_Domain = Carbon13  
X\_Freq = 150.91343039[MHz]  
X\_Offset = 100[ppm]  
X\_Points = 32768  
X\_Pressure = 4  
X\_Resolution = 1.44496109[Hz]  
X\_Sweep = 47.34848488[kHz]  
X\_Sweep\_Clipped = 37.87978788[kHz]  
Irr\_Domain = Proton  
Irr\_Freq = 600.1723046[MHz]  
Irr\_Offset = 5[ppm]  
BLANKING = 15.0[us]  
Clipped = FALSE  
Scans = 33  
Total\_Scans = 33

Relaxation\_Delay = 1[s]  
Recvr\_Gain = 56  
Temp\_Dec = 22.5[degC]  
X\_90\_Width = 0.11[us]  
X\_Acq\_Time = 0.69206016[s]  
X\_Angle = 30[deg]  
X\_Arr = 11[dB]  
X\_Pulse = 2.7[us]  
Irr\_Atn\_Dec = 25.803[dB]  
Irr\_Atn\_Dec\_Calc = 25.803[dB]  
Irr\_Atn\_Dec\_Default\_Calc = 25.803[dB]  
Irr\_Atn\_Noise = 25.803[dB]  
Irr\_Dec\_Bandwidth\_Hz = 7.23894211[kHz]  
Irr\_Dec\_Bandwidth\_Ppm = 12.05794078[ppm]  
Irr\_Dec\_Freq = 600.1723046[MHz]  
Irr\_Dec\_Merit\_Factor = 2.2  
Irr\_Decoupling = TRUE  
Irr\_Noise = TMR  
Irr\_Noise = WALTZ  
Irr\_Offset\_Default = 5[ppm]  
Irr\_Width = 76[us]  
Irr\_Width\_Default = 76[us]  
Irr\_Width\_Default\_Calc = 76[us]  
Irr\_Width\_Templ = 76[us]  
Irr\_Wurst = FALSE  
Decimation\_Rate = 0  
Initial\_Wait = 1[s]  
Noe\_Time = 1[s]  
Noe\_Time\_Flag = FALSE  
Relaxation\_Delay\_Calc = 0[s]  
Relaxation\_Delay\_Temp = 1[s]  
Repetition\_Time = 1.69206016[s]

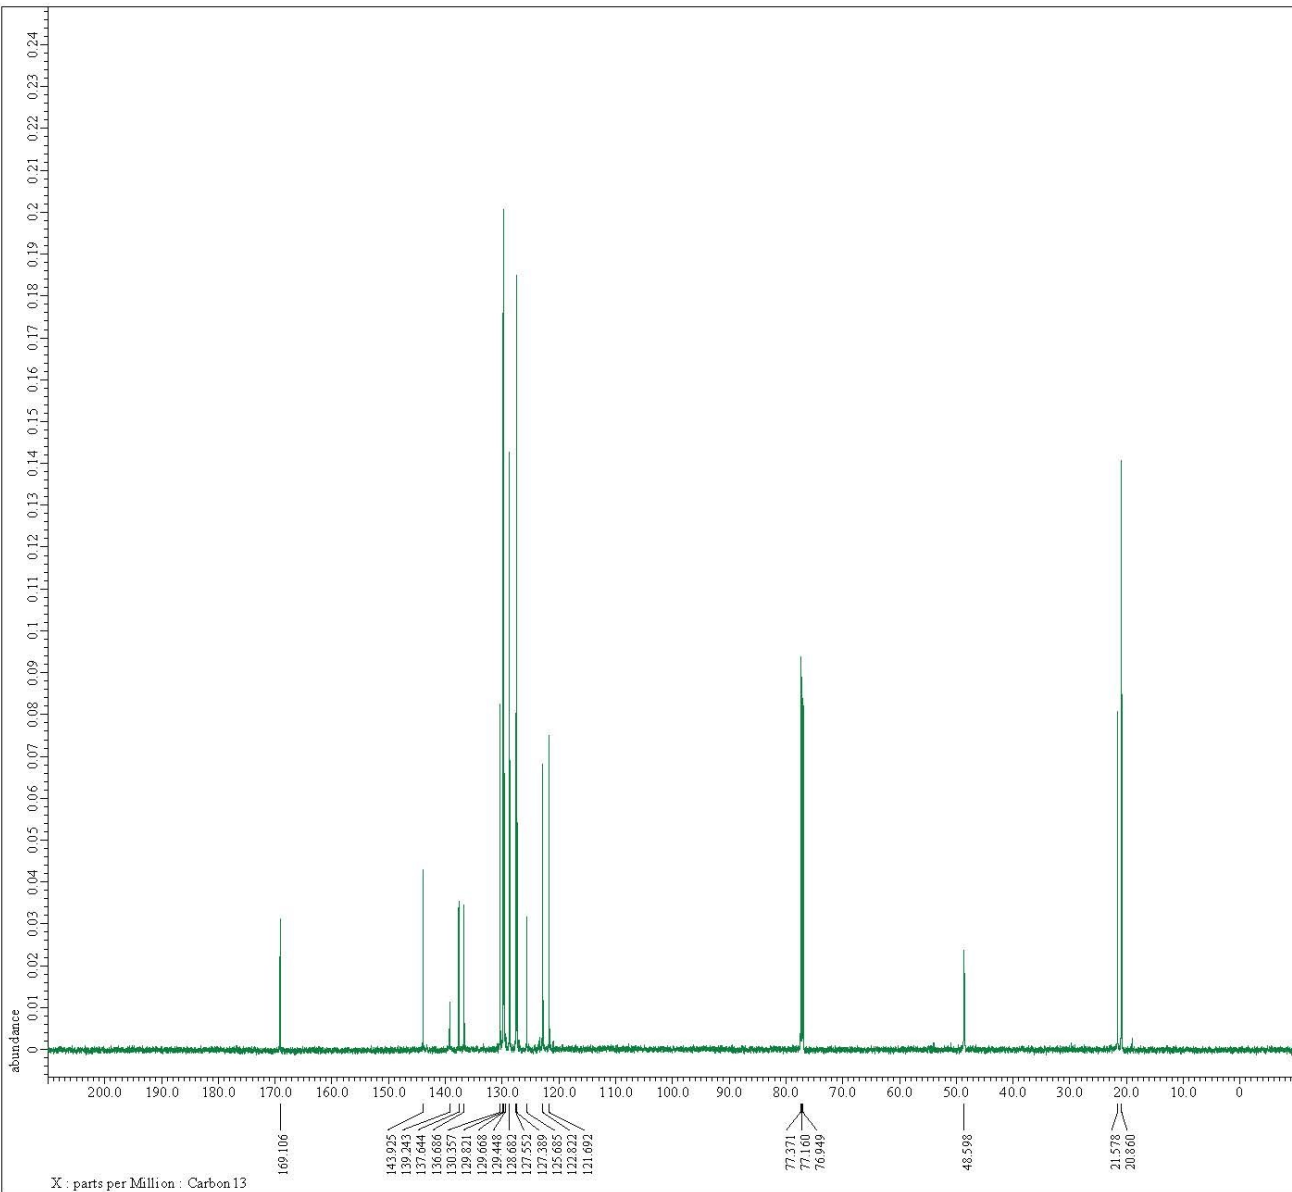



---- PROCESSING PARAMETERS ----  
sexp( 0.2[Hz], 0.0[s] )  
trapezoid( 0[Hz], 0[Hz], 80[Hz], 100[Hz] )  
zerofill( 1, TRUE )  
fft( 1, TRUE, TRUE )  
machinephase  
ppm

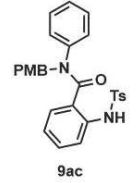

Filename = KV-1-032-1\_proton-1-3.jdf  
Author = delta  
Experiment = proton.jxp  
Sample\_id = KV-1-032-1  
Solvent = CHLOROFORM-D  
Actual\_Start\_Time = 24-APR-2024 10:35:09  
Revision\_Time = 24-APR-2024 14:52:40  
Comment = single pulse  
Data Format = 1D COMPLEX  
Dim\_Size = 26214  
X\_Domain = Proton  
Dim\_Title = Proton  
Dim\_Units = [ppm]  
Dimensions = X  
Spectrometer = JNM-ECZ600R/S3  
Field\_Strength = 14.09636928(T) (600[MHz])  
X\_Acq\_Duration = 2.90455552[s]  
X\_Domain = Proton  
X\_Freq = 600.1723046[MHz]  
X\_Offset = 5[ppm]  
X\_Points = 32768  
X\_Prescans = 1  
X\_Resolution = 0.34428676[Hz]  
X\_Sweep = 11.28158845[KHz]  
X\_Sweep\_Clipped = 3.05270796[MHz]  
Irr\_Domain = Proton  
Irr\_Freq = 600.1723046[MHz]  
Irr\_Offset = 5[ppm]  
Tri\_Domain = Proton  
Tri\_Freq = 600.1723046[MHz]  
Tri\_Offset = 5[ppm]  
Blanking = 5.0[us]  
Clipped = FALSE  
Scans = 4  
Total\_Scans = 4  
Relaxation\_Delay = 10[s]  
Recvr\_Gain = 26  
Temp\_Set = 22.5[degC]  
X\_90\_Width = 9.9[us]  
X\_Acq\_Time = 2.90455552[s]  
X\_Angle = 45[deg]  
X\_Atn = 8.1[dB]  
X\_Pulse = 4.95[us]  
Irr\_Mode = Off  
Tri\_Mode = Off  
Dante\_Loop = 1000  
Dante\_Preset = FALSE  
Decimation\_Rate = 0  
Initial\_Wait = 1[s]  
Phase = (0, 90, 270, 180, 180, 270, 90, 0)  
Preset\_Time = 10[s]  
Preset\_Time\_Play = FALSE  
Relaxation\_Delay\_Calc = 0[s]  
Relaxation\_Delay\_Temp = 10[s]  
Repetition\_Time = 12.90455552[s]

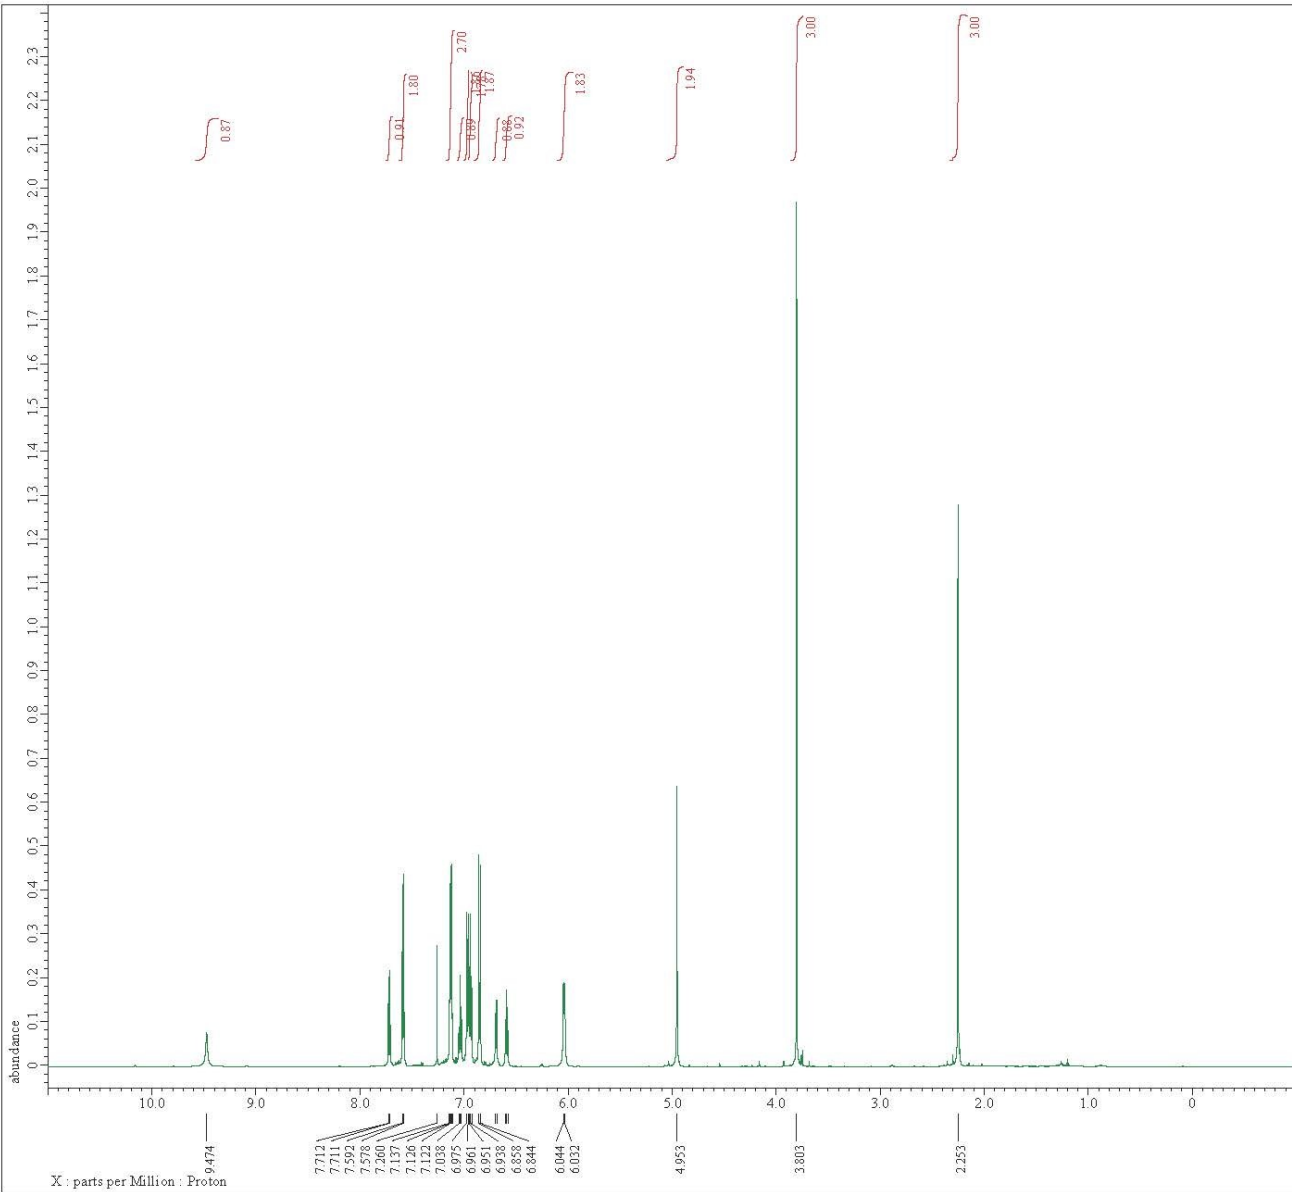



---- PROCESSING PARAMETERS ----

blip\_cld( 16, 64, 1 )  
sexp( 2.0[Hz], 0.0[s] )  
fft( 1, TRUE, TRUE )  
machinephase  
ppm

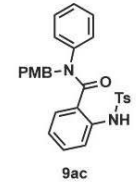

Filename = KV-1-032-1\_carbon-1-2.jdf  
Author = delta  
Experiment = carbon\_jsp  
Sample\_id = KV-1-032-1  
Solvent = CHLOROFORM-D  
Actual\_Start\_Time = 24-APR-2024 10:36:47  
Revision\_Time = 24-APR-2024 10:38:56  
Comment = single pulse decoupled gated NOE  
Data Format = 1D COMPLEX  
Dim\_Size = 26214  
X\_Domain = Carbon13  
Dim\_Title = Carbon13  
Dim\_Units = [ppm]  
Dimensions = X  
Spectrometer = JNM-ECZ600R/S3  
Field Strength = 14.09636928[T] (600 [MHz])  
X\_Acq\_Duration = 0.69206016[s]  
X\_Domain = Carbon13  
X\_Freq = 150.91343039[MHz]  
X\_Offset = 100[ppm]  
X\_Points = 32768  
X\_Prescans = 4  
X\_Resolution = 1.44496109[Hz]  
X\_Sweep = 47.34848485[kHz]  
X\_Sweep\_Clipped = 37.87878788[kHz]  
Irr\_Domain = Proton  
Irr\_Freq = 600.1723046[MHz]  
Irr\_Offset = 0[ppm]  
Blanking = 15.0[us]  
Clipped = FALSE  
Scans = 39  
Total\_Scans = 39  
Relaxation\_Delay = 1[s]  
Recvr\_Gain = 56  
Temp\_Set = 22.5[degC]  
X\_P0\_Width = 8.1[us]  
X\_Acq\_Time = 0.69206016[s]  
X\_Angle = 90[deg]  
X\_Atn = 11[deg]  
X\_Pulse = 2.7[us]  
Irr\_Atn\_Dec = 25.803[deg]  
Irr\_Atn\_Dec\_Calc = 25.803[deg]  
Irr\_Atn\_Dec\_Default\_Calc = 25.803[deg]  
Irr\_Atn\_Max = 25.803[deg]  
Irr\_Dec\_Bandwidth\_Hz = 7.23684211[kHz]  
Irr\_Dec\_Bandwidth\_Ppm = 12.05794078[ppm]  
Irr\_Dec\_Freq = 600.1723046[MHz]  
Irr\_Dec\_Merit\_Factor = 2.2  
Irr\_Decoupling = TRUE  
Irr\_Noise = TRUE  
Irr\_Noise = WALTZ  
Irr\_Offset\_Default = 5[ppm]  
Irr\_Peakch = 76[us]  
Irr\_Peakch\_Default = 76[us]  
Irr\_Peakch\_Default\_Calc = 76[us]  
Irr\_Peakch\_Temp1 = 76[us]  
Irr\_Wurst = FALSE  
Decimation\_Rate = 0  
Initial\_Wait = 1[s]  
Noe\_Time = 1[s]  
Noe\_Time\_Play = FALSE  
Relaxation\_Delay\_Calc = 0[s]  
Relaxation\_Delay\_Temp = 1[s]  
Repetition\_Time = 1.69206016[s]

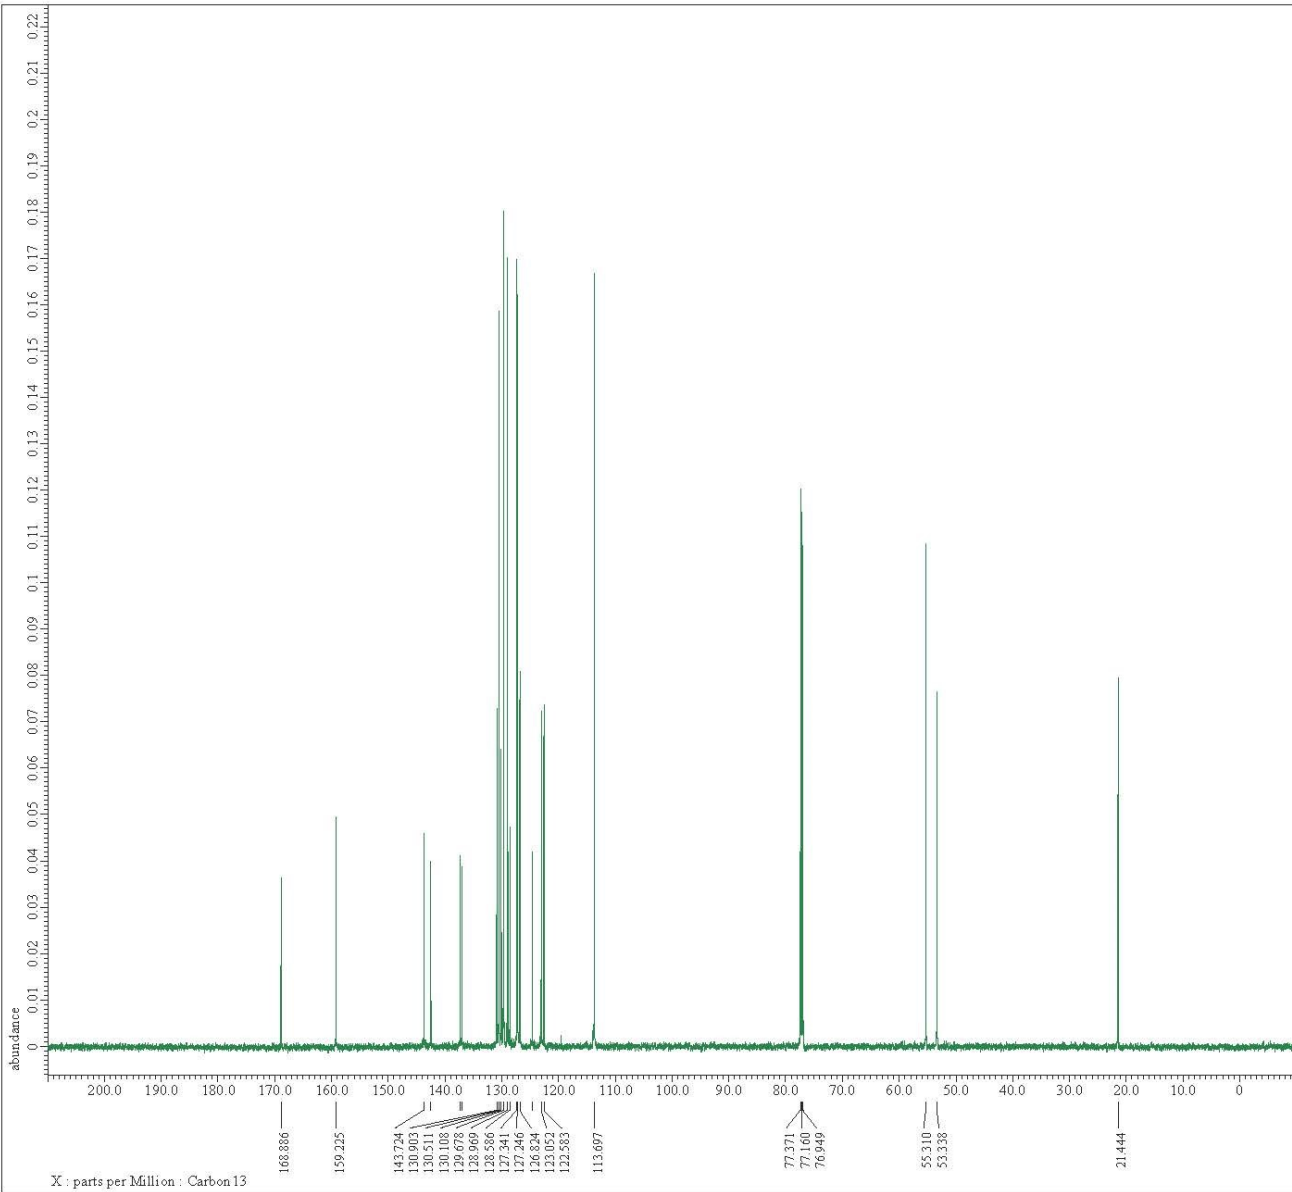



---- PROCESSING PARAMETERS ----  
sexp( 0.2[Hz], 0.0[s] )  
trapezoid( 0[Hz], 0[Hz], 80[Hz], 100[Hz] )  
zerofill( 1, TRUE )  
fft( 1, TRUE, TRUE )  
machinephase  
ppa

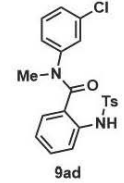

Filename = KV-1-051-2\_proton-1-3.jdf  
Author = delta  
Experiment = proton.jxp  
Sample\_id = KV-1-051-2  
Solvent = CHLOROFORM-D  
Actual\_Start\_Time = 25-JUN-2024 22:02:41  
Revision\_Time = 26-JUN-2024 13:11:33

Data Format = 1D COMPLEX  
Data Size = 26214  
X\_Domain = Proton  
Data Title = Proton  
Data Units = (ppm)  
Dimensions = X  
Spectrometer = JNM-ECZ600R/S3

Field Strength = 14.0963628(T) (600(MHz))  
X\_AcqDuration = 2.18365952(s)  
X\_Domain = Proton  
X\_Freq = 600.1723046(MHz)  
X\_Offset = 5(ppm)  
X\_Points = 32768  
X\_Prescans = 1  
X\_Resolution = 0.45794605(Hz)  
X\_Sweep = 15.0050024(KHz)  
X\_Sweep\_Clippped = 12.00480192(KHz)  
Irr\_Domain = Proton  
Irr\_Freq = 600.1723046(MHz)  
Irr\_Offset = 5(ppm)  
Tri\_Domain = Proton  
Tri\_Freq = 600.1723046(MHz)  
Tri\_Offset = 5(ppm)  
Blanking = 5.0(us)  
Clipped = FALSE  
Scans = 4  
Total\_Scans = 4

Relaxation\_Delay = 2(s)  
Recvr Gain = 36  
Temp Det = 21.9(4C)  
X\_90Pulse = 9.9(us)  
X\_Acq Time = 2.18365952(s)  
X\_Angle = 45(deg)  
X\_Atn = 8.1(dB)  
X\_Pulse = 4.95(us)  
Irr\_Mode = Off  
Tri\_Mode = Off  
Dante Loop = 200  
Dante\_Preset = FALSE  
Decimation\_Rate = 0  
Initial\_Wait = 1(s)  
Phase = (0, 90, 270, 180, 180, 270, 90, 0)  
Preset\_Time = 2(s)  
Preset\_Time\_Play = FALSE  
Relaxation\_Delay\_Calc = 0(s)  
Relaxation\_Delay\_Temp = 2(s)  
Repetition\_Time = 4.18365952(s)

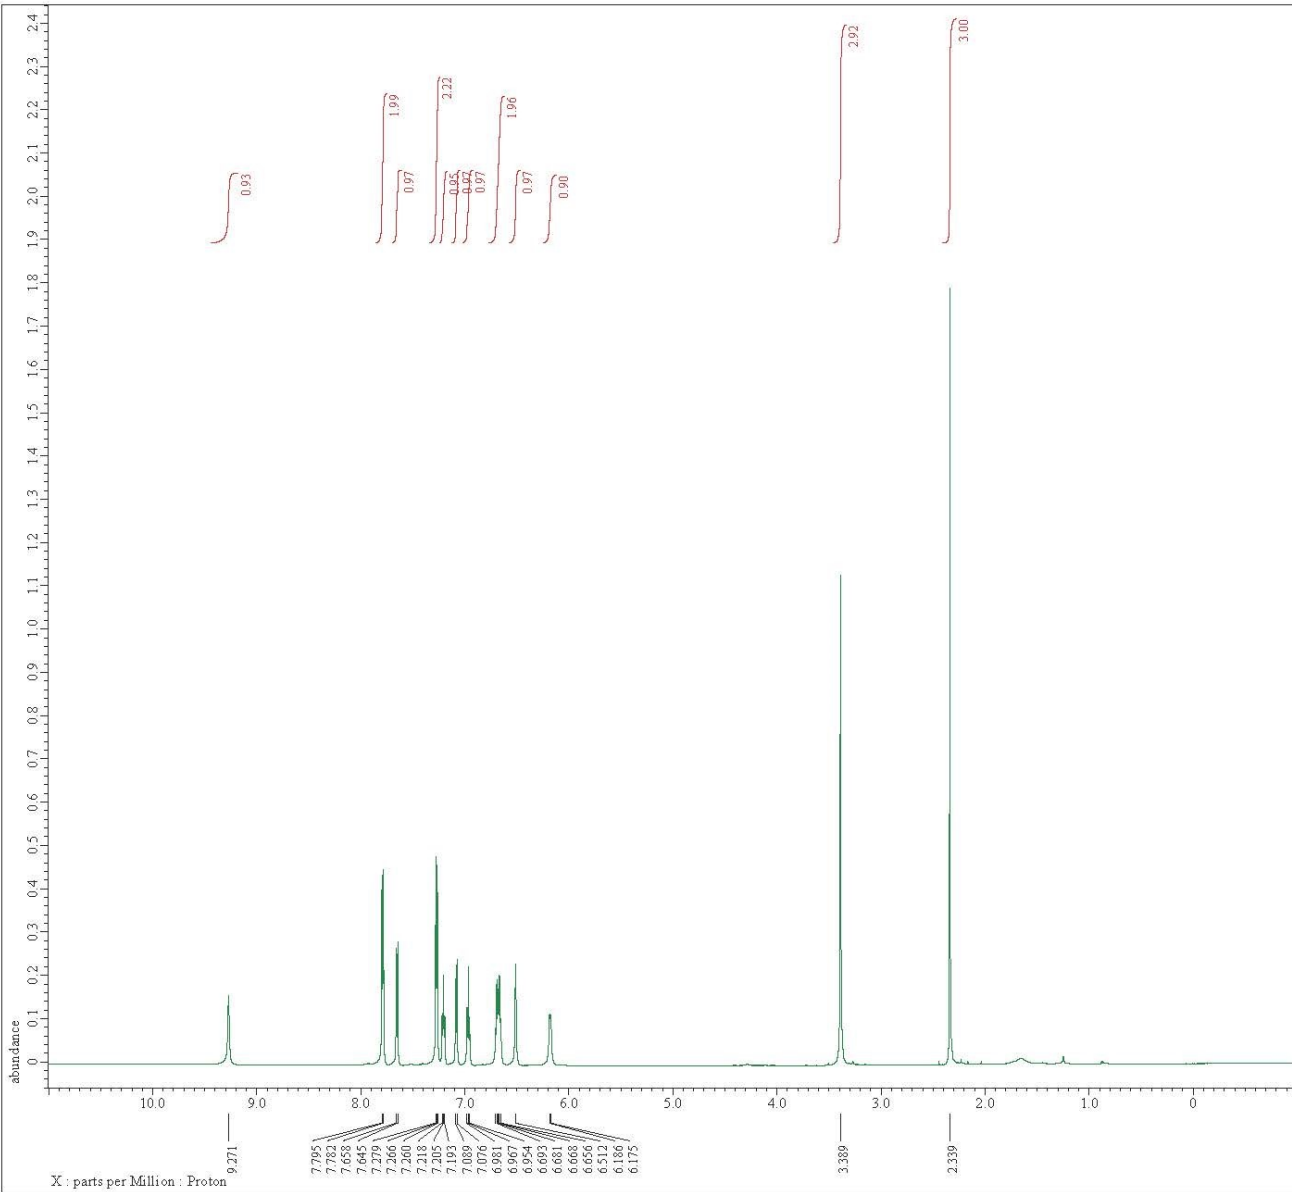



---- PROCESSING PARAMETERS ----

```
blip_cld(16, 64, 1)
sexp(2.01Hz, 0.0[s])
fft(1, TRUE, TRUE)
machinephase
ppm
```

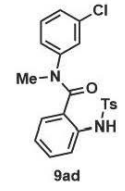

```
Filename = KY-1-051-2_carbon-1-2.jdf
Author = delca
Experiment = carbon_jsp
Sample_id = KY-1-051-2
Solvent = CHLOROFORM-D
Actual_Start_Time = 25-JUN-2024 22:04:42
Revision_Time = 25-JUN-2024 22:04:20

Data Format = 1D COMPLEX
Dim Size = 26214
X_Domain = Carbon13
Dim Title = Carbon13
Dim Units = [ppm]
Dimensions = X
Spectrometer = JNM-ECZ600R/S3

Field Strength = 14.09636928 [T] (600 [MHz])
X_Acq_Duration = 0.69206016 [s]
X_Domain = Carbon13
X_Freq = 150.91343039 [MHz]
X_Offset = 100 [ppm]
X_Points = 32768
X_Prescans = 1
X_Resolution = 1.44496109 [Hz]
X_Sweep = 47.34848485 [kHz]
X_Sweep_Clipped = 37.87878788 [kHz]
Irr_Domain = proton
Irr_Freq = 600.1723046 [MHz]
Irr_Offset = 5 [ppm]
Blanking = 15.0 [us]
Clipped = FALSE
Scans = 64
Total_Scans = 64

Relaxation_Delay = 1 [s]
Recvr_Gain = 56
Temp_Set = 22.1 [dC]
X_90_Width = 0.11 [us]
X_Acq_Time = 0.69206016 [s]
X_Angle = 30 [deg]
X_Am = 11 [dB]
X_Pulse = 2.7 [us]
Irr_Am_Dec = 25.803 [dB]
Irr_Am_Dec_Calc = 25.803 [dB]
Irr_Am_Dec_Default_Calc = 25.803 [dB]
Irr_Dec_Bandwidth_Hz = 7.23684211 [kHz]
Irr_Dec_Bandwidth_Ppm = 12.05794079 [ppm]
Irr_Dec_Freq = 600.1723046 [MHz]
Irr_Dec_Merit_Factor = 2.2
Irr_Decoupling = TRUE
Irr_Noise = FALSE
Irr_Noise = WALTZ
Irr_Offset_Default = 5 [ppm]
Irr_Width = 76 [us]
Irr_Width_Default = 76 [us]
Irr_Width_Default_Calc = 76 [us]
Irr_Width_Templ = 76 [us]
Irr_Wurst = FALSE
Decimation_Rate = 0
Initial_Wait = 1 [s]
Noe_Time = 1 [s]
Noe_Time_Play = FALSE
Relaxation_Delay_Calc = 0 [s]
Relaxation_Delay_Temp = 1 [s]
Repetition_Time = 1.69206016 [s]
```

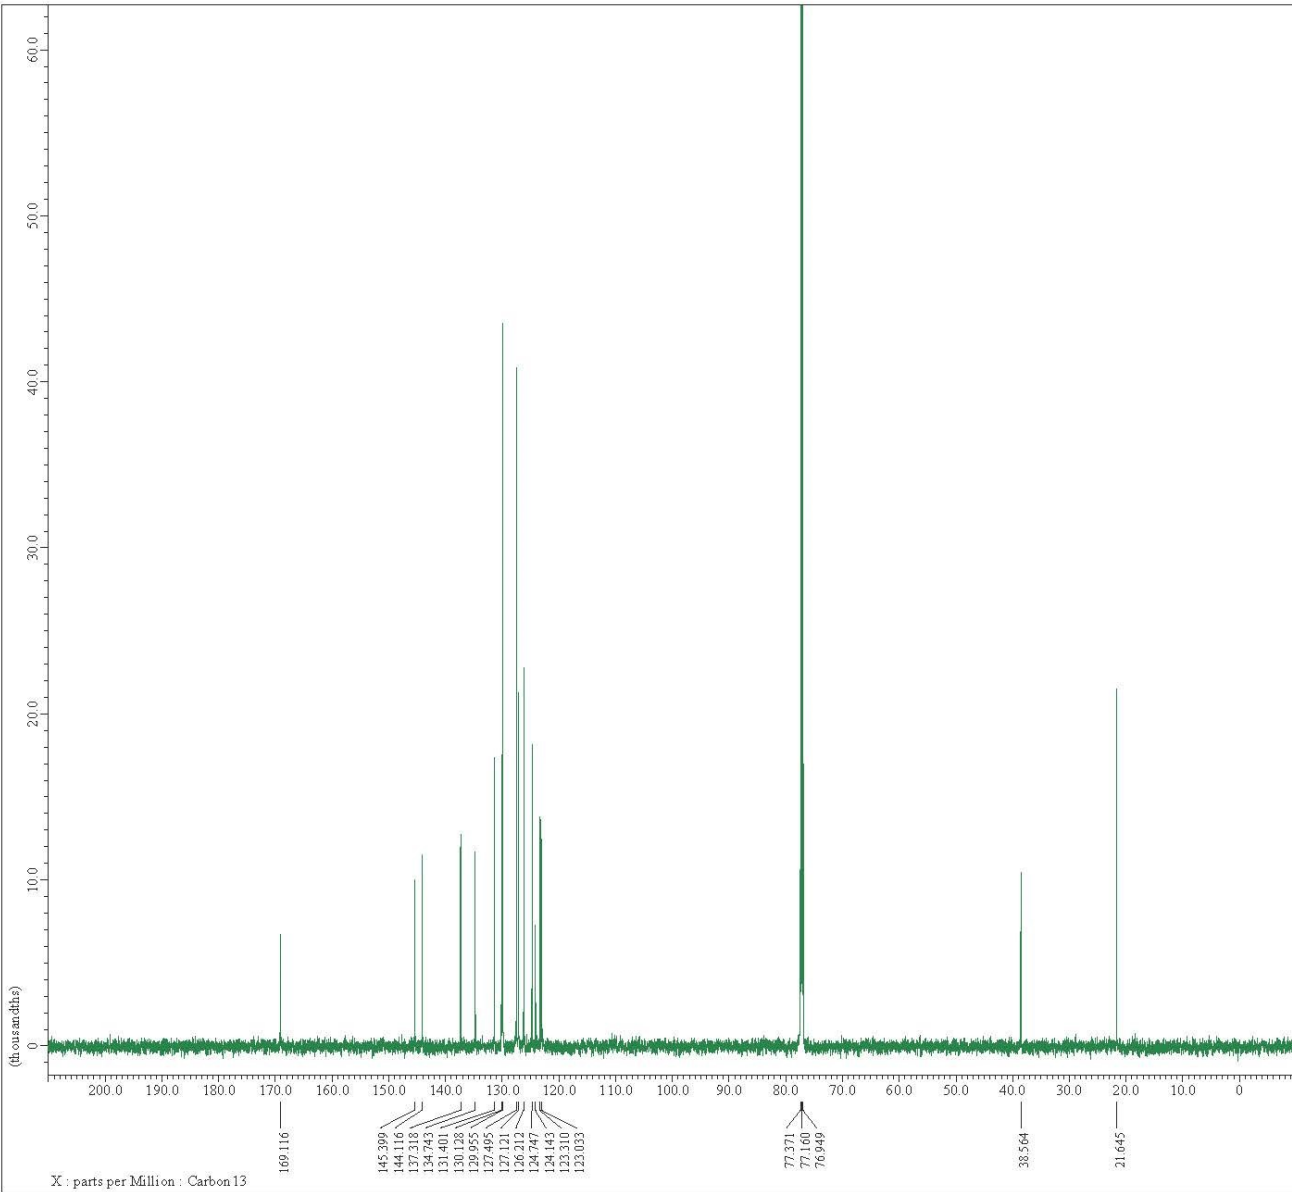



---- PROCESSING PARAMETERS ----  
sexp( 0.2[MHz], 0.0[s] )  
trapasoid( 0[Hz], 0[Hz], 80[Hz], 100[Hz] )  
zerofill( 1, TRUE )  
fft( 1, TRUE, TRUE )  
machephase  
ppm

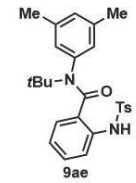

Filename = TW-6-113-1\_proton-1-3.jdf  
Author = delta  
Experiment = proton\_jsp  
Sample\_Id = TW-6-113-1  
Solvent = CHLOROFORM-D  
Actual\_Start\_Time = 15-MAY-2024 07:23:10  
Revision\_Time = 4-JUL-2024 21:23:08

Data Format = 1D COMPLEX  
Dim Size = 26214  
X\_Domain = Proton  
Dim Title = Proton  
Dim Units = (ppm)  
Dimensions = X  
Spectrometer = JNM-ECZ600R/S3

Field Strength = 14.09636928[T] (600[MHz])  
X\_Acq\_Duration = 2.18103808[s]  
X\_Domain = Proton  
X\_Freq = 600.1723046[MHz]  
X\_Offset = 8[ppm]  
X\_Points = 32768  
X\_Prescans = 1  
X\_Resolution = 0.45849727[Hz]  
X\_Sweep = 15.02403846[kHz]  
X\_Sweep\_Clippped = 12.01923077[kHz]  
Irr\_Domain = Proton  
Irr\_Freq = 600.1723046[MHz]  
Irr\_Offset = 8[ppm]  
Tri\_Domain = Proton  
Tri\_Freq = 600.1723046[MHz]  
Tri\_Offset = 8[ppm]  
Blanking = 5.0[us]  
Clipped = FALSE  
Scans = 4  
Total\_Scans = 4

Relaxation\_Delay = 2[s]  
Recvr\_Gain = 26  
Temp\_Get = 21.5[degC]  
X\_90\_Width = 9.9[us]  
X\_Acq\_Time = 2.18103808[s]  
X\_Angle = 45[deg]  
X\_Atn = 8.1[dB]  
X\_Pulse = 4.35[us]  
Irr\_Mode = Off  
Tri\_Mode = Off  
Danta\_Loop = 200  
Danta\_Preset = FALSE  
Decimation\_Rate = 0  
Initial\_Wait = 1[s]  
Phase = (0, 90, 270, 180, 180, 270, 90, 0)  
Preset\_Time = 2[s]  
Preset\_Time\_Play = FALSE  
Relaxation\_Delay\_Calc = 0[s]  
Relaxation\_Delay\_Temp = 2[s]  
Repetition\_Time = 4.18103808[s]

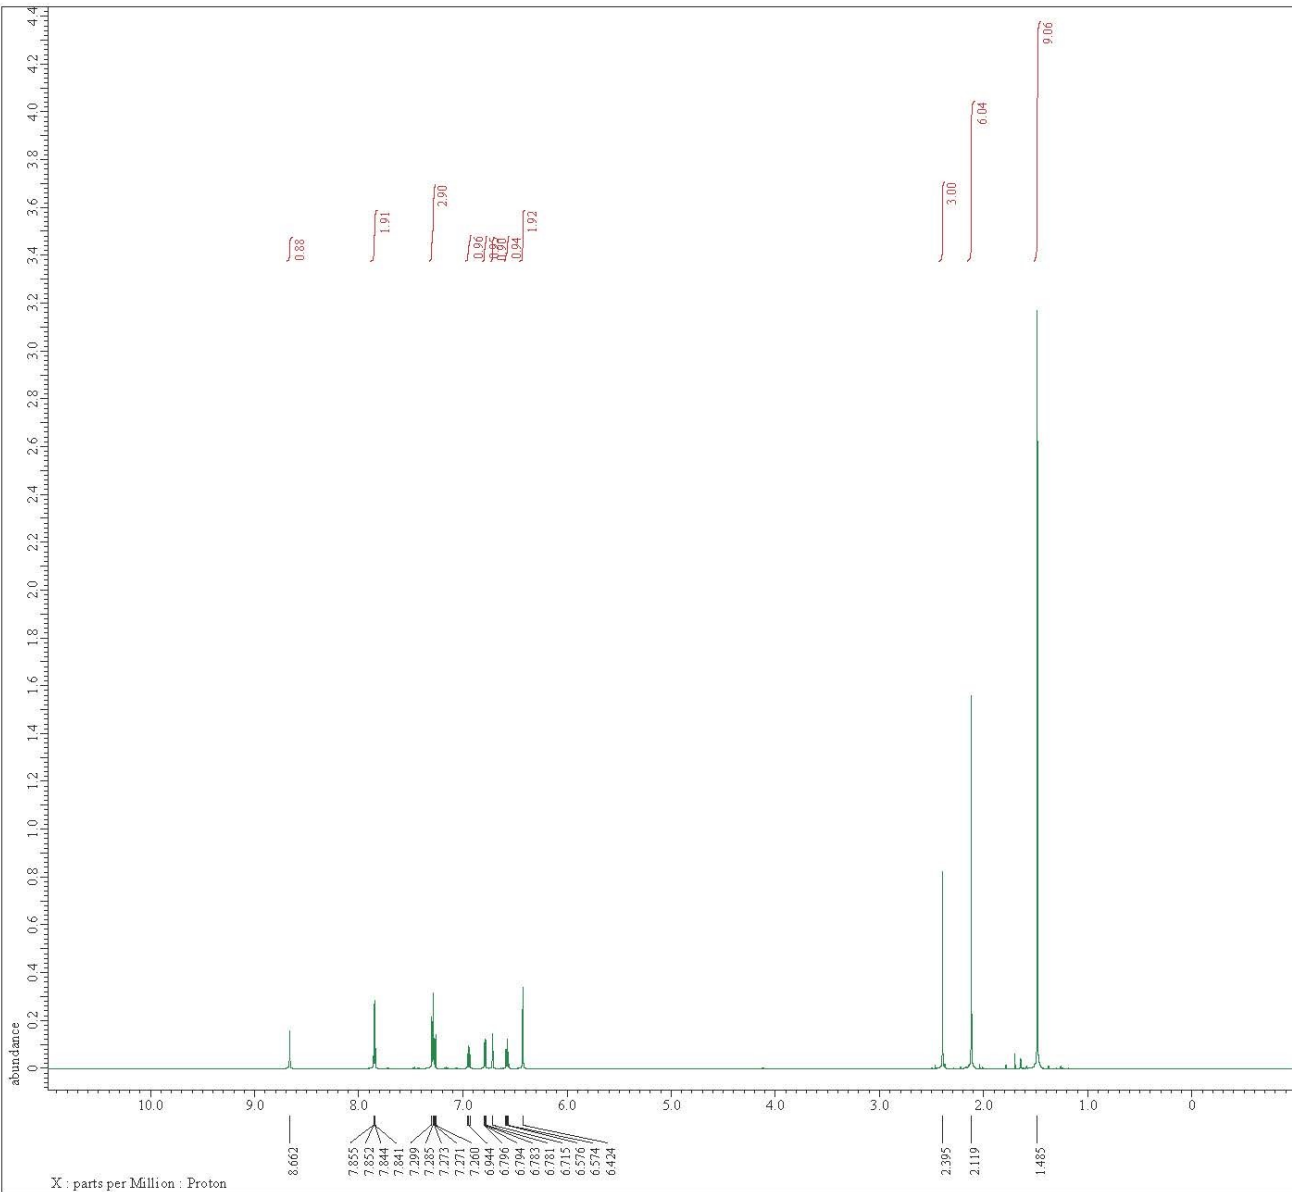



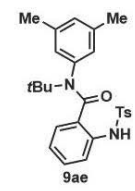

---- PROCESSING PARAMETERS ----  
blip\_cld(15, 64, 1)  
sezp(2.0[Hz], 0.0[s])  
ft(1, TRUE, TRUE)  
machinephase  
ppm

Filename = TK-6-113-1\_carbon-1-2.jdf  
Author = delta  
Experiment = carbon\_jsp  
Sample Id = TK-6-113-1  
Solvent = CHLOROFORM-D  
Actual\_Start\_Time = 15-MAY-2024 07:24:04  
Revision\_Time = 15-MAY-2024 07:27:39  
Comment = NPPH3  
Data\_Format = 1D\_COMPLEX  
Dim\_Size = 26214  
X\_Domain = Carbon13  
Yn\_Title = Carbon13  
Dim\_Units = [ppm]  
Dimensions = X  
Spectrometer = JNM-EC2600R/S3  
Field\_Strength = 14.09436328 [T] (600 [MHz])  
X\_Acq\_Duration = 0.69206016 [s]  
X\_Domain = Carbon13  
X\_Freq = 150.91343039 [MHz]  
X\_Offset = 100 [ppm]  
X\_Points = 32768  
X\_Prescans = 4  
X\_Resolution = 1.44496109 [Hz]  
X\_Sweep = 47.34848488 [kHz]  
X\_Sweep\_Clipped = 37.87878788 [kHz]  
Irr\_Domain = Proton  
Irr\_Freq = 600.1723046 [MHz]  
Irr\_Offset = 5 [ppm]  
BLANKING = 15.0 [us]  
Clipped = FALSE  
Scans = 64  
Total\_Scans = 64  
Relaxation\_Delay = 1 [s]  
Recvr\_Gain = 56  
Temp\_Dec = 21.5 [dC]  
X\_90\_Width = 8.11 [us]  
X\_Acq\_Time = 0.69206016 [s]  
X\_Angle = 30 [deg]  
X\_Arc = 11 [dB]  
X\_Pulse = 2.7 [us]  
Irr\_Atn\_Dec = 25.803 [dB]  
Irr\_Atn\_Dec\_Calc = 25.803 [dB]  
Irr\_Atn\_Dec\_Default\_Calc = 25.803 [dB]  
Irr\_Atn\_Noise = 25.803 [dB]  
Irr\_Dec\_Bandwidth\_Hz = 7.23884211 [kHz]  
Irr\_Dec\_Bandwidth\_Ppm = 12.05794078 [ppm]  
Irr\_Dec\_Freq = 600.1723046 [MHz]  
Irr\_Dec\_Merit\_Factor = 2.2  
Irr\_Decoupling = TRUE  
Irr\_Noise = TRUE  
Irr\_Noise = WALTZ  
Irr\_Offset\_Default = 5 [ppm]  
Irr\_Width = 96 [us]  
Irr\_Width\_Default = 76 [us]  
Irr\_Width\_Default\_Calc = 76 [us]  
Irr\_Width\_Templ = 96 [us]  
Irr\_Wurst = FALSE  
Decimation\_Rate = 0  
Initial\_Wait = 1 [s]  
Noe\_Time = 1 [s]  
Noe\_Time\_Flag = FALSE  
Relaxation\_Delay\_Calc = 0 [s]  
Relaxation\_Delay\_Temp = 1 [s]  
Repetition\_Time = 1.69206016 [s]

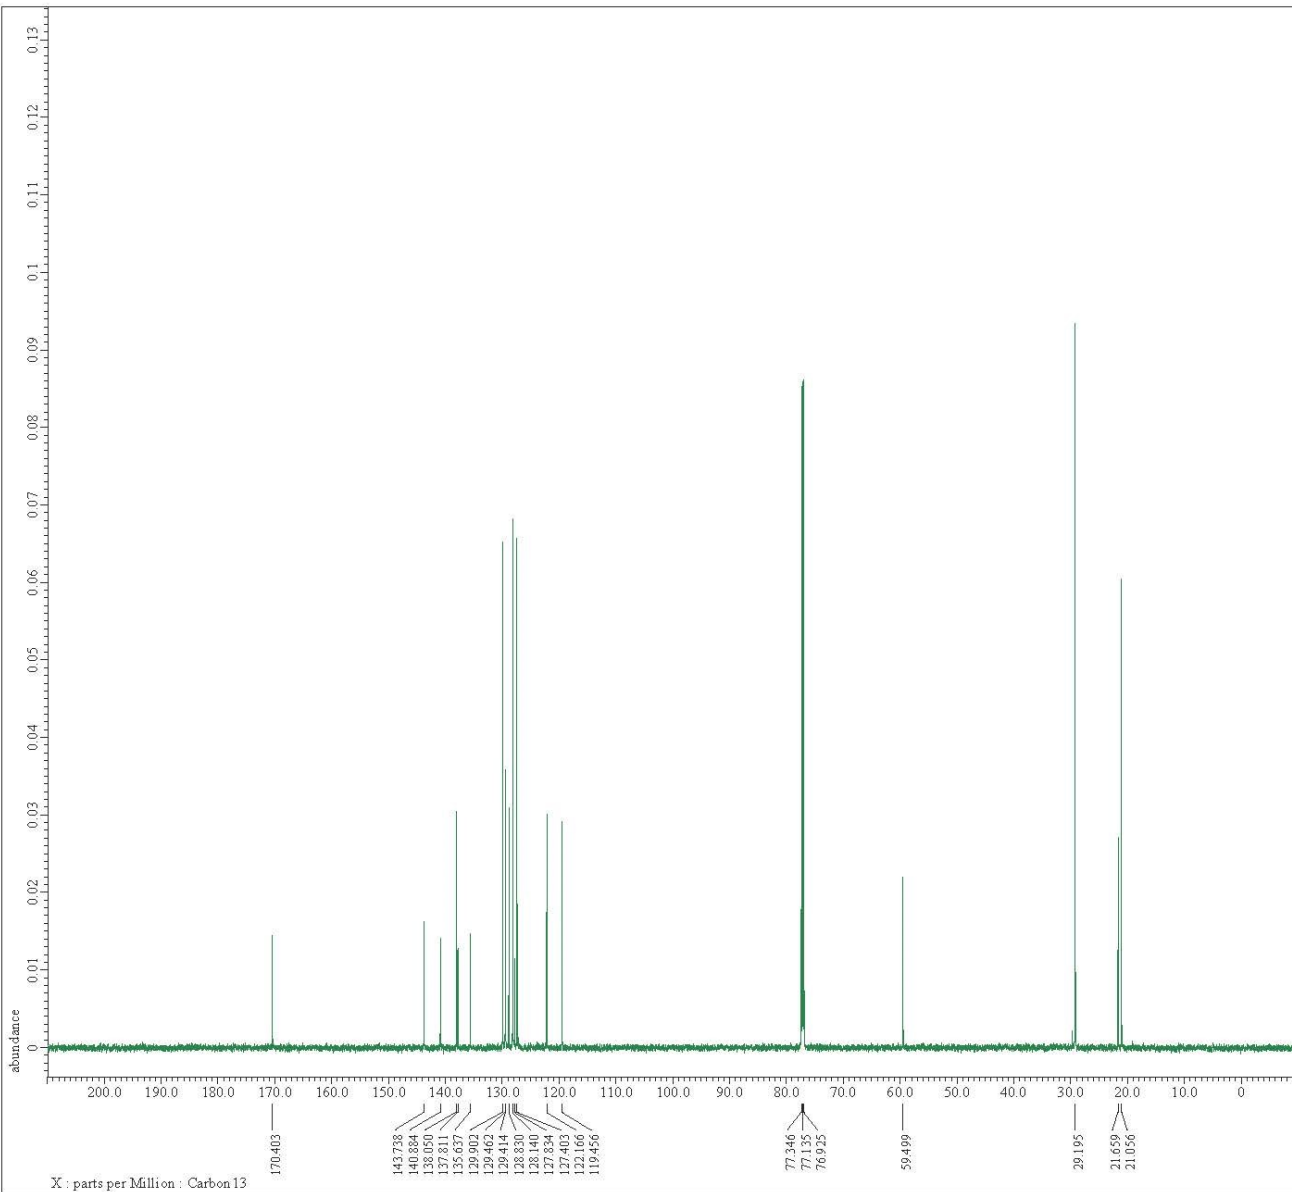



---- PROCESSING PARAMETERS ----  
sexp( 0.2[Hz], 0.0[s] )  
trapezoid( 0[Hz], 0[Hz], 80[Hz], 100[Hz] )  
zerofill( 1, TRUE )  
fft( 1, TRUE, TRUE )  
machinphase  
ppa

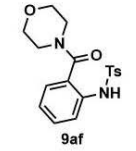

Filename = TW-6-072-2\_proton-1-3.jdf  
Author = delta  
Experiment = proton.jxp  
Sample\_id = TW-6-072-2  
Solvent = CHLOROFORM-D  
Actual\_Start\_Time = 13-APR-2024 09:41:58  
Repetition\_Time = 13-APR-2024 11:52:42

Data Format = 1D COMPLEX  
Data Size = 26214  
X\_Domain = Proton  
Data Title = Proton  
Data Units = (ppm)  
Dimensions = X  
Spectrometer = JNM-ECC600R/S3

Field Strength = 14.0963628[T] (600[MHz])  
X\_AcqDuration = 2.18103808[s]  
X\_Domain = Proton  
X\_Freq = 600.1723046[MHz]  
X\_Offset = 5[ppm]  
X\_Points = 32768  
X\_Prescans = 1  
X\_Resolution = 0.45849727[Hz]  
X\_Sweep = 15.02403846[kHz]  
X\_Sweep\_Clippped = 12.01923077[kHz]  
Irr\_Domain = Proton  
Irr\_Freq = 600.1723046[MHz]  
Irr\_Offset = 5[ppm]  
Tri\_Domain = Proton  
Tri\_Freq = 600.1723046[MHz]  
Tri\_Offset = 8[ppm]  
Blanking = 5.0[usec]  
Clipped = FALSE  
Scans = 4  
Total\_Scans = 4

Relaxation\_Delay = 1[s]  
Recvr Gain = 26  
Temp\_Det = 21.7[degC]  
X\_90Width = 9.9[usec]  
X\_Acq Time = 2.18103808[s]  
X\_Angle = 45[deg]  
X\_Atn = 8.1[dB]  
X\_Pulse = 4.95[usec]  
Irr\_Mode = Off  
Tri\_Mode = Off  
Dante\_Loop = 100  
Dante\_Presat = FALSE  
Decimation\_Rate = 0  
Initial\_Wait = 1[s]  
Phase = (0, 90, 270, 180, 180, 270, 90, 0)  
Presat\_Time = 1[s]  
Presat\_Time\_Play = FALSE  
Relaxation\_Delay\_Calc = 0[s]  
Relaxation\_Delay\_Temp = 1[s]  
Repetition\_Time = 3.18103808[s]

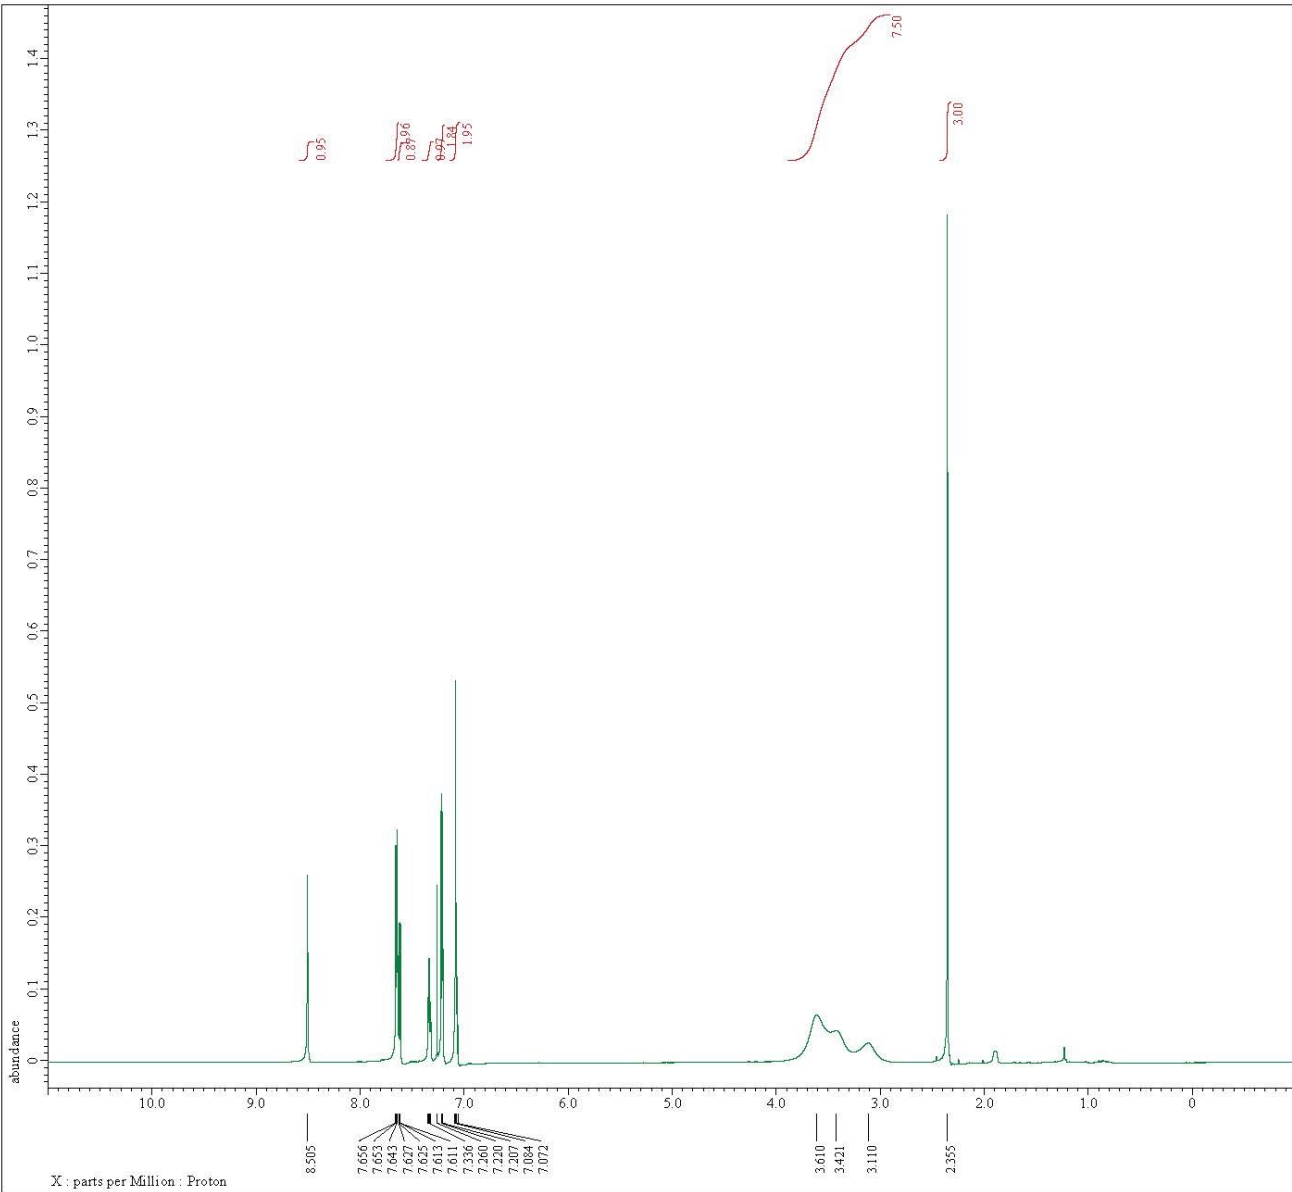



---- PROCESSING PARAMETERS ----

```
blip_cld( 16, 64, 1 )
secp( 2.0[Hz], 0.0[s] )
fft( 1, TRUE, TRUE )
machinephase
ppm
```

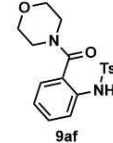

```
Filename = TK-6-072-2_carbon-1-2.jdf
Author = delta
Experiment = carbon_jsp
Sample_id = TK-6-072-2
Solvent = CHLOROFORM-D
Actual_Start_Time = 13-APR-2024 09:42:50
Revision_Time = 13-APR-2024 09:47:08

Data Format = 1D COMPLEX
Data Size = 26214
X_Domain = Carbon13
Data Title = Carbon13
Data Units = [ppm]
Dimensions = X
Spectrometer = JNM-ECZ600R/S3

Field Strength = 14.09636928[T] (600 [MHz])
X_Acq_Duration = 0.69206016[s]
X_Domain = Carbon13
X_Freq = 150.91343039 [MHz]
X_Offset = 100 [ppm]
X_Points = 32768
X_Prescans = 4
X_Resolution = 1.44496109 [Hz]
X_Sweep = 47.34848485 [kHz]
X_Sweep_Clippped = 37.87878788 [kHz]
Irr_Domain = proton
Irr_Freq = 600.1723046 [MHz]
Irr_Offset = 5 [ppm]
Blanking = 15.0 [us]
Clipped = TRUE
Scans = 64
Total_Scans = 64

Relaxation_Delay = 2 [s]
Recvs_Gain = 36
Temp_Set = 21.7 [dC]
X_90_Width = 0.11 [us]
X_Acq_Time = 0.69206016 [s]
X_Angle = 30 [deg]
X_Am = 11 [dB]
X_Pulse = 2.7 [us]
Irr_Am_Dec = 25.803 [dB]
Irr_Am_Dec_Calc = 25.803 [dB]
Irr_Am_Dec_Default_Calc = 25.803 [dB]
Irr_Am_Noise = 25.803 [dB]
Irr_Dec_Bandwidth_Hz = 7.22694211 [kHz]
Irr_Dec_Bandwidth_Ppm = 12.05794078 [ppm]
Irr_Dec_Freq = 600.1723046 [MHz]
Irr_Dec_Magic_Factor = 2.2
Irr_Decoupling = TRUE
Irr_Noise = TRUE
Irr_Offset_Default = 5 [ppm]
Irr_Pwidth = 76 [us]
Irr_Pwidth_Default = 76 [us]
Irr_Pwidth_Default_Calc = 76 [us]
Irr_Pwidth_Templ = 76 [us]
Irr_Wurst = FALSE
Decimation_Rate = 0
Initial_Wait = 1 [s]
Noe_Time = 2 [s]
Noe_Time_Flag = FALSE
Relaxation_Delay_Calc = 0 [s]
Relaxation_Delay_Temp = 2 [s]
Repetition_Time = 2.69206016 [s]
```

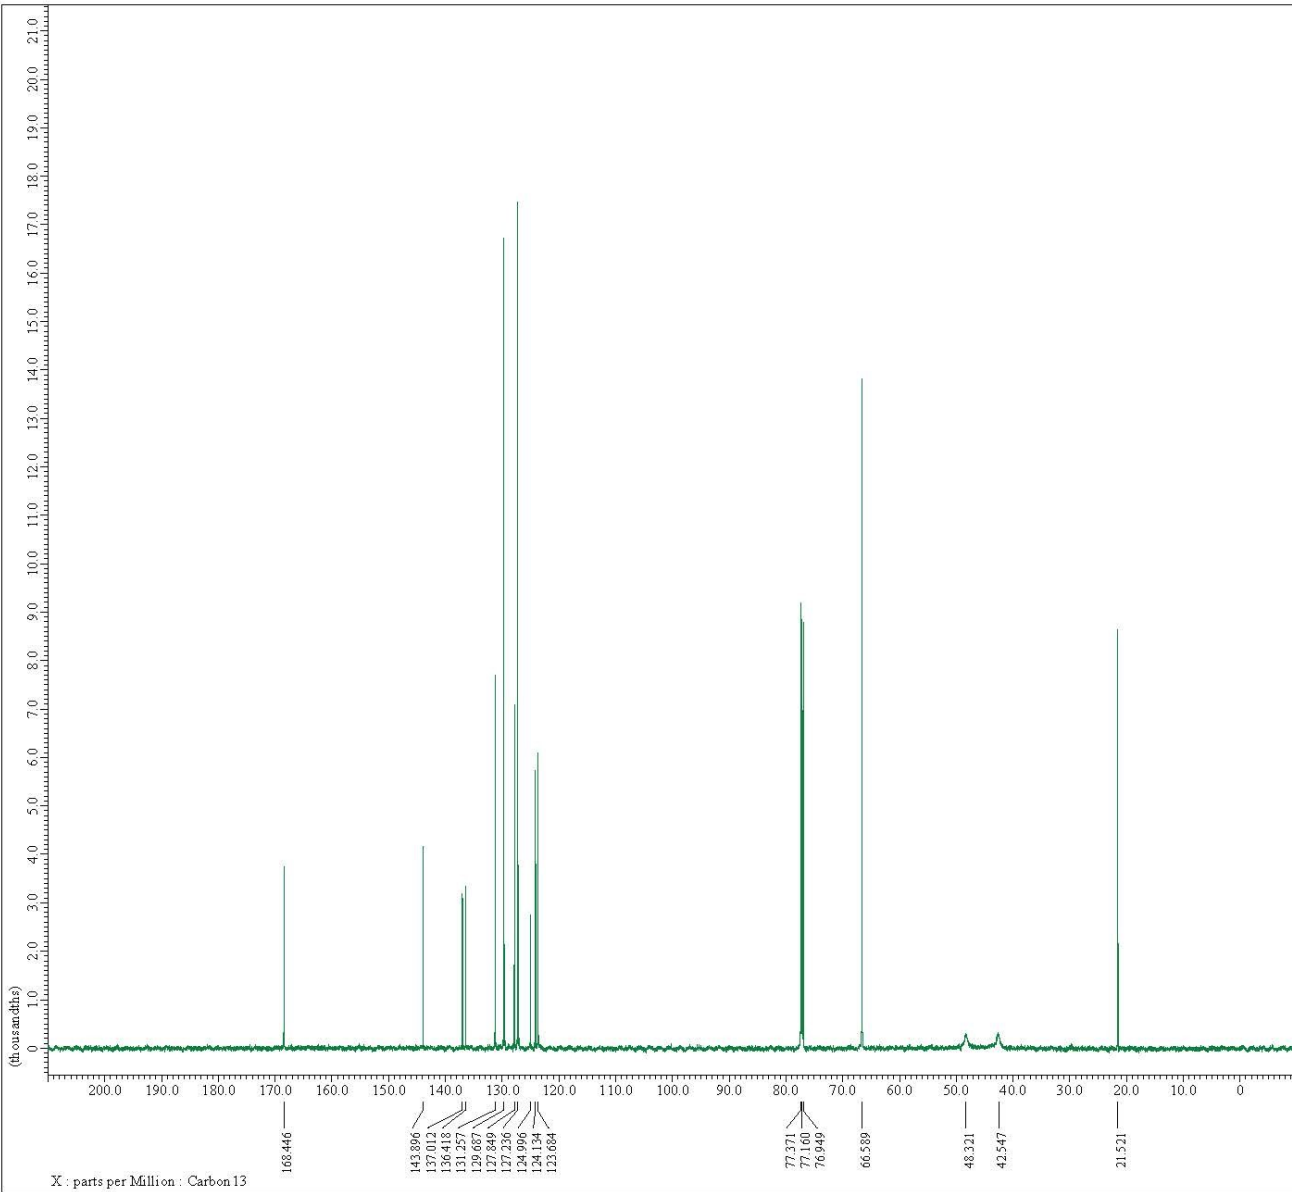

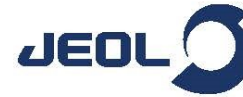

---- PROCESSING PARAMETERS ----  
sexp( 0.2[MHz], 0.0[s] )  
trapezoid( 0[Hz], 0[Hz], 80[Hz], 100[Hz] )  
zerofill( 1, TRUE )  
fft( 1, TRUE, TRUE )  
machinephase  
ppm  
base\_correct( Akima, 5, 0, FALSE, 3, None, FALSE )

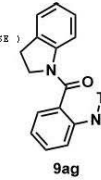

Filename = Th-6-144-1\_proton-1-3.jdf  
Author = delta  
Experiment = proton.jsp  
Sample\_Id = Th-6-144-1  
Solvent = CHLOROFORM-D  
Actual\_Start\_Time = 19-JUN-2024 21:24:04  
Revision\_Time = 4-JUL-2024 21:31:54

Data Format = 1D REAL  
Da Size = 26214  
X\_Domain = Proton  
Da Title = Proton  
Da Units = (ppm)  
Dimensions = X  
Spectrometer = JNM-ECZ600R/S3

Field Strength = 14.09636928[T] (600[MHz])  
X\_Acq\_Duration = 2.18365952[s]  
X\_Domain = Proton  
X\_Freq = 600.1723046[MHz]  
X\_Offset = 8[ppm]  
X\_Points = 32768  
X\_Prescans = 1  
X\_Resolution = 0.45794605[Hz]  
X\_Sweep = 15.0060024[kHz]  
X\_Sweep\_Clippped = 12.00480192[kHz]  
Irr\_Domain = Proton  
Irr\_Freq = 600.1723046[MHz]  
Irr\_Offset = 8[ppm]  
Tri\_Domain = Proton  
Tri\_Freq = 600.1723046[MHz]  
Tri\_Offset = 8[ppm]  
Blanking = 5.0[us]  
Clipped = FALSE  
Scans = 4  
Total\_Scans = 4

Relaxation\_Delay = 2[s]  
Recvr\_Gain = 26  
Temp\_Get = 20.8[degC]  
X\_90\_Width = 9.9[us]  
X\_Acq\_Time = 2.18365952[s]  
X\_Angle = 45[deg]  
X\_Atn = 8.1[dB]  
X\_Pulse = 4.35[us]  
Irr\_Mode = Off  
Tri\_Mode = Off  
Data\_Loop = 200  
Data\_Preset = FALSE  
Decimation\_Rate = 0  
Initial\_Wait = 1[s]  
Phase = (0, 90, 270, 180, 180, 270, 90, 0)  
Preset\_Time = 2[s]  
Preset\_Time\_Flag = FALSE  
Relaxation\_Delay\_Calc = 0[s]  
Relaxation\_Delay\_Temp = 2[s]  
Repetition\_Time = 4.18365952[s]

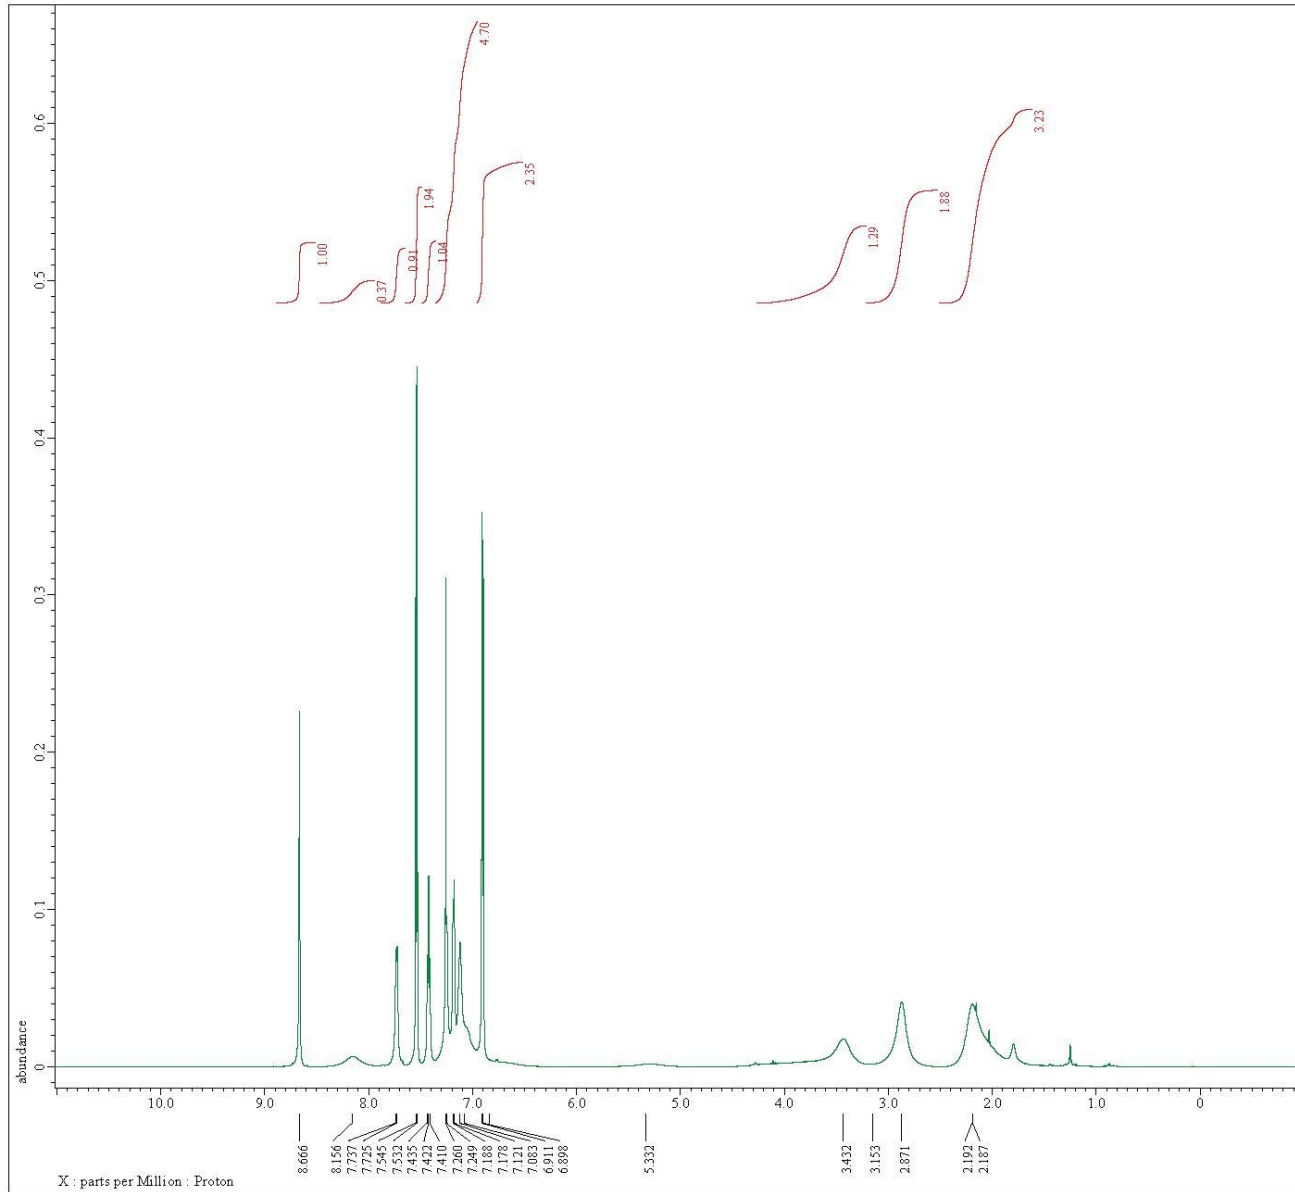



---- PROCESSING PARAMETERS ----  
blip\_cld(16, 64, 1)  
sezp(2.0[Hz], 0.0[s])  
ft(1, TRUE, TRUE)  
machinephase  
ppm

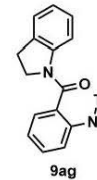

Filename = Tk-6-144-1\_carbon-1-2.jdf  
Author = delta  
Experiment = carbon\_jsp  
Sample Id = Tk-6-144-1  
Solvent = CHLOROFORM-D  
Actual\_Start\_Time = 19-JUN-2024 21:26:04  
Revision\_Time = 19-JUN-2024 21:33:18

Data Format = 1D COMPLEX  
Dim Size = 2624  
X\_Domain = Carbon13  
Dim Title = Carbon13  
Dim Units = (ppm)  
Dimensions = X  
Spectrometer = JNM-ECZ600R/S3

Field Strength = 14.05636928(T) (600[MHz])  
X\_Acq\_Duration = 0.69206016[s]  
X\_Domain = Carbon13  
X\_Freq = 150.91343039[MHz]  
X\_Offset = 100[ppm]  
X\_Points = 32768  
X\_Prescans = 1  
X\_Resolution = 1.44496109[Hz]  
X\_Sweep = 47.34848485[kHz]  
X\_Sweep\_Clippped = 37.87878788[kHz]  
Irr\_Domain = Proton  
Irr\_Freq = 600.1723046[MHz]  
Irr\_Offset = 5[ppm]  
Blanking = 15.0[us]  
Clipped = FALSE  
Scans = 229  
Total\_Scans = 229

Relaxation\_Delay = 1.5[s]  
Recvr\_Gain = 55  
Temp\_Cet = 21.8[dC]  
X\_90\_Width = 8.1[us]  
X\_Acq\_Time = 0.69206016[s]  
X\_Angle = 30[deg]  
X\_Atn = 11[dB]  
X\_Pulse = 2.7[us]  
Irr\_Atn\_Dec = 25.803[dB]  
Irr\_Atn\_Dec\_Calc = 25.803[dB]  
Irr\_Atn\_Dec\_Default\_Calc = 25.803[dB]  
Irr\_Atn\_Noise = 25.803[dB]  
Irr\_Dec\_Bandwidth\_Hz = 7.23684211[kHz]  
Irr\_Dec\_Bandwidth\_Ppm = 12.05784078[ppm]  
Irr\_Dec\_Freq = 600.1723046[MHz]  
Irr\_Dec\_Haric\_Factor = 2.2  
Irr\_Decoupling = TRUE  
Irr\_Noise = TRUE  
Irr\_Offset\_Default = 5[ppm]  
Irr\_Pwldch = 76[us]  
Irr\_Pwldch\_Default = 76[us]  
Irr\_Pwldch\_Default\_Calc = 76[us]  
Irr\_Pwldch\_Templ = 76[us]  
Irr\_Thurst = FALSE  
Decimation\_Rate = 0  
Initial\_Wait = 1[s]  
Noe\_Time = 1.5[s]  
Noe\_Time\_Flag = FALSE  
Relaxation\_Delay\_Calc = 0[s]  
Relaxation\_Delay\_Temp = 1.5[s]  
Repetition\_Time = 2.19206016[s]

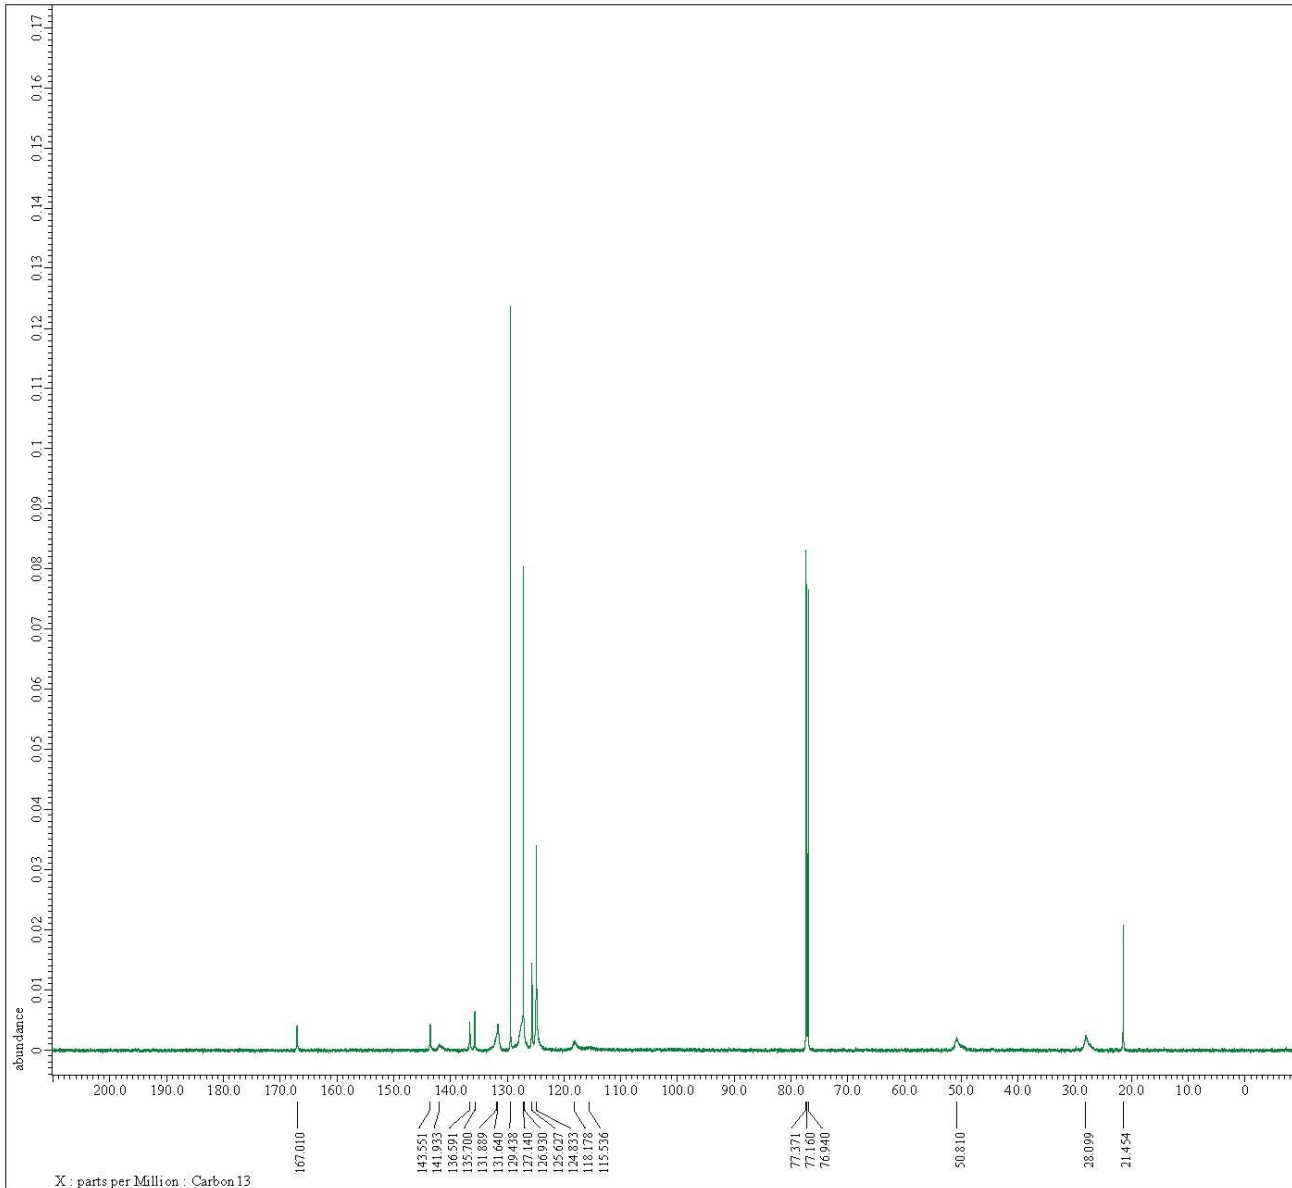

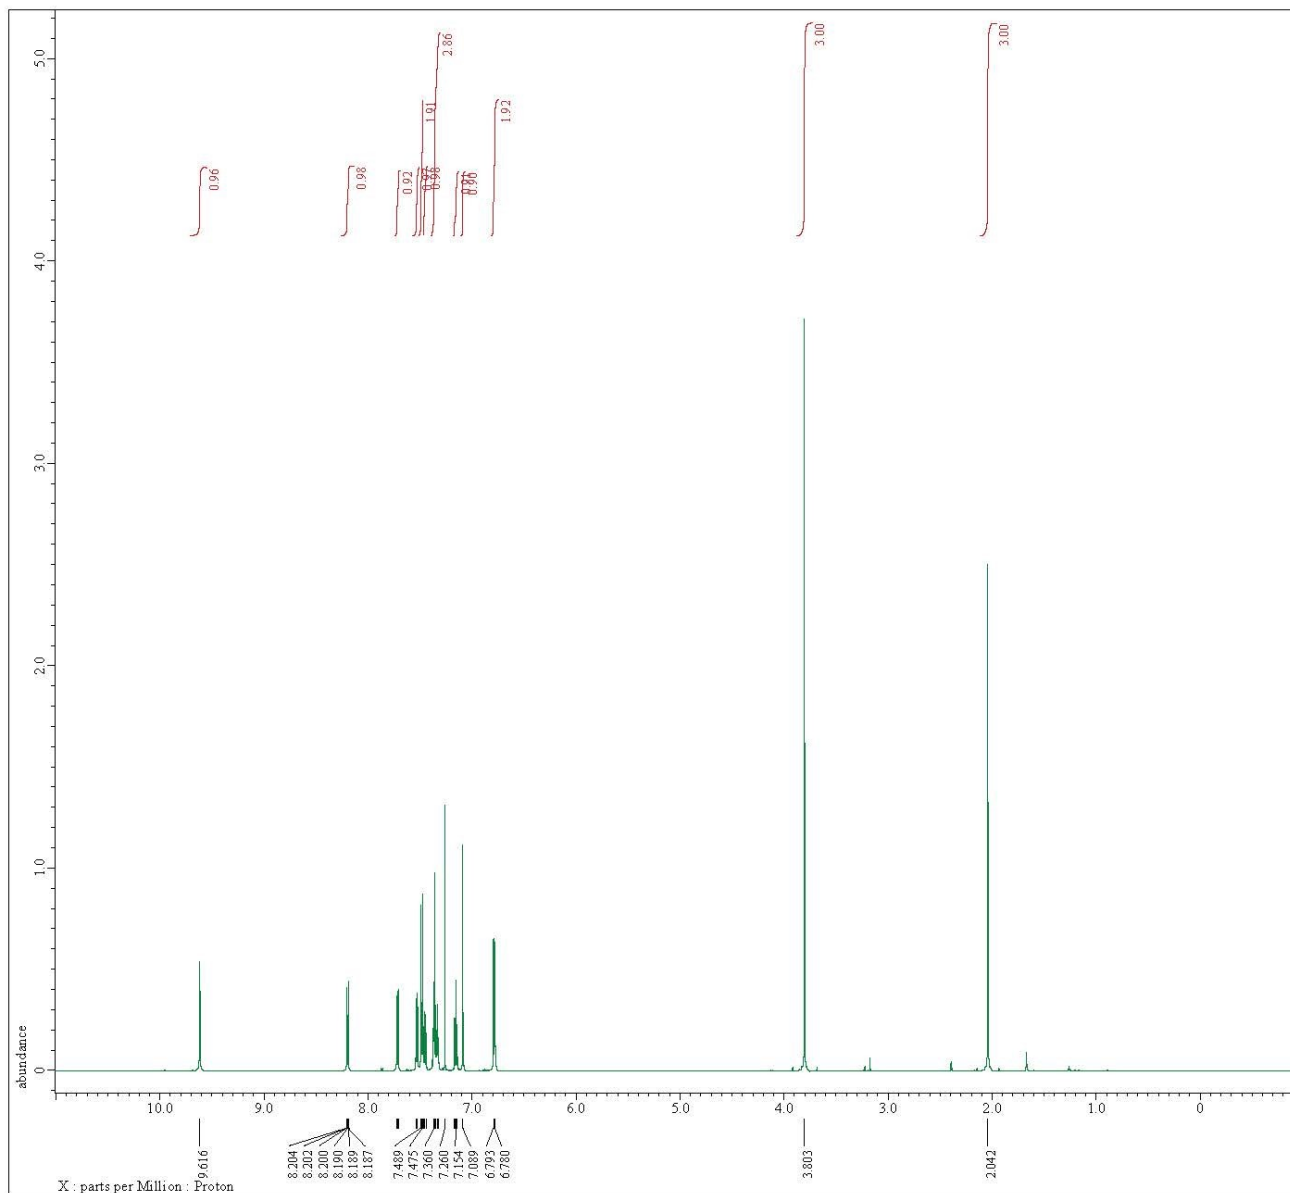

```

---- PROCESSING PARAMETERS ----
sexp( 0.2[Hz], 0.0[s] )
trapezoid( 0[Hz], 0[Hz], 80[Hz], 100[Hz] )
zerofill( 1, TRUE )
fft( 1, TRUE, TRUE )
machinephase
ppm
  
```

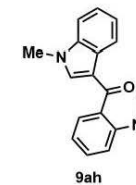

```

Filename      = Th-6-085-3_proton-1-3.jdf
Author       = delta
Experiment   = proton.jsp
Sample Id    = Th-6-085-3
Solvent      = CHLOROFORM-D
Actual_Start_Time = 20-APR-2024 15:20:25
Revision_Time   = 1-JUL-2024 11:11:23

Comment      = single pulse
Data Format   = 1D COMPLEX
Dim Size     = 26214
X_Domain     = Proton
Y_Domain     = Proton
X_Offset     = 5[ppm]
X_Points     = 32768
X_Fscans     = 1
X_Resolution = 0.34428676[Hz]
X_Sweep      = 11.28158845[kHz]
X_Sweep_Clippped = 9.02527076[kHz]
Irr_Domain   = Proton
Irr_Freq     = 600.1723046[MHz]
Irr_Offset   = 5[ppm]
Tri_Domain   = Proton
Tri_Freq     = 600.1723046[MHz]
Tri_Offset   = 5[ppm]
Blanking     = 5.0[us]
Clipped      = FALSE
Scans        = 4
Total_Scans  = 4

Relaxation_Delay = 10[s]
Recvr_Gain       = 36
Temp_Set        = 21.5[degC]
X_90_Pulse      = 9.9[us]
X_Acq_Time      = 2.90455552[s]
X_Angle         = 45[deg]
X_Arc           = 8.1[deg]
X_Pulse         = 4.95[us]
Irr_Mode        = Off
Tri_Mode        = Off
Dante_Loop      = 1000
Dante_Preset    = FALSE
Decimation_Rate = 0
Initial_Wait    = 1[s]
Phase           = ( 0, 90, 270, 180, 180, 270, 90, 0 )
Preset_Time     = 10[s]
Preset_Time_Flag = FALSE
Relaxation_Delay_Calc = 0[s]
Relaxation_Delay_Temp = 10[s]
Repetition_Time = 12.90455552[s]
  
```



---- PROCESSING PARAMETERS ----  
blip\_cld( 16, 64, 1 )  
secp( 2.0[Hz], 0.0[s] )  
fft( 1, TRUE, TRUE )  
machinephase  
ppm

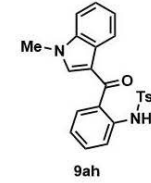

Filename = Tk-6-085-3\_carbon-1-2.jdf  
Author = delta  
Experiment = carbon\_jsp  
Sample\_id = Tk-6-085-3  
Solvent = CHLOROFORM-D  
Actual\_Start\_Time = 20-APR-2024 18:23:20  
Revision\_Time = 20-APR-2024 18:28:21  
Comment = single pulse decoupled gated NMR  
Data\_Format = 1D\_COMPLEX  
Dim\_Size = 26214  
X\_Domain = Carbon13  
Dim\_Title = Carbon13  
Dim\_Units = [ppm]  
Dimensions = X  
Spectrometer = JNM-ECZ600R/S3  
Field\_Strength = 14.09636928[T] (600[MHz])  
X\_Acq\_Duration = 0.69206016[s]  
X\_Domain = Carbon13  
X\_Freq = 150.91343039[MHz]  
X\_Offset = 100[ppm]  
X\_Points = 32768  
X\_Prescans = 4  
X\_Resolution = 1.44496109[Hz]  
X\_Sweep = 47.3484848[kHz]  
X\_Sweep\_Clipped = 37.87878788[kHz]  
Irr\_Domain = Proton  
Irr\_Freq = 600.1723046[MHz]  
Irr\_Offset = 0[ppm]  
Blanking = 15.0[us]  
Clipped = FALSE  
Scans = 36  
Total\_Scans = 36  
Relaxation\_Delay = 1[s]  
Recvr\_Gain = 56  
Temp\_Set = 21.3[degC]  
X\_P0\_Width = 8.1[us]  
X\_Acq\_Time = 0.69206016[s]  
X\_Angle = 90[deg]  
X\_Phn = 11[deg]  
X\_Pulse = 2.7[us]  
Irr\_Atn\_Dec = 25.803[dB]  
Irr\_Atn\_Dec\_Calc = 25.803[dB]  
Irr\_Atn\_Dec\_Default\_Calc = 25.803[dB]  
Irr\_Atn\_Max = 25.803[dB]  
Irr\_Dec\_Bandwidth\_Hz = 7.23684211[kHz]  
Irr\_Dec\_Bandwidth\_Ppm = 12.05794078[ppm]  
Irr\_Dec\_Freq = 600.1723046[MHz]  
Irr\_Dec\_Merit\_Factor = 2.2  
Irr\_Decoupling = TRUE  
Irr\_Noise = TRUE  
Irr\_Noise = WALTZ  
Irr\_Offset\_Default = 5[ppm]  
Irr\_Pwidth = 76[us]  
Irr\_Pwidth\_Default = 76[us]  
Irr\_Pwidth\_Default\_Calc = 76[us]  
Irr\_Pwidth\_Temp1 = 76[us]  
Irr\_Wurst = FALSE  
Decimation\_Rate = 0  
Initial\_Wait = 1[s]  
Noe\_Time = 1[s]  
Noe\_Time\_Play = FALSE  
Relaxation\_Delay\_Calc = 0[s]  
Relaxation\_Delay\_Temp = 1[s]  
Repetition\_Time = 1.69206016[s]

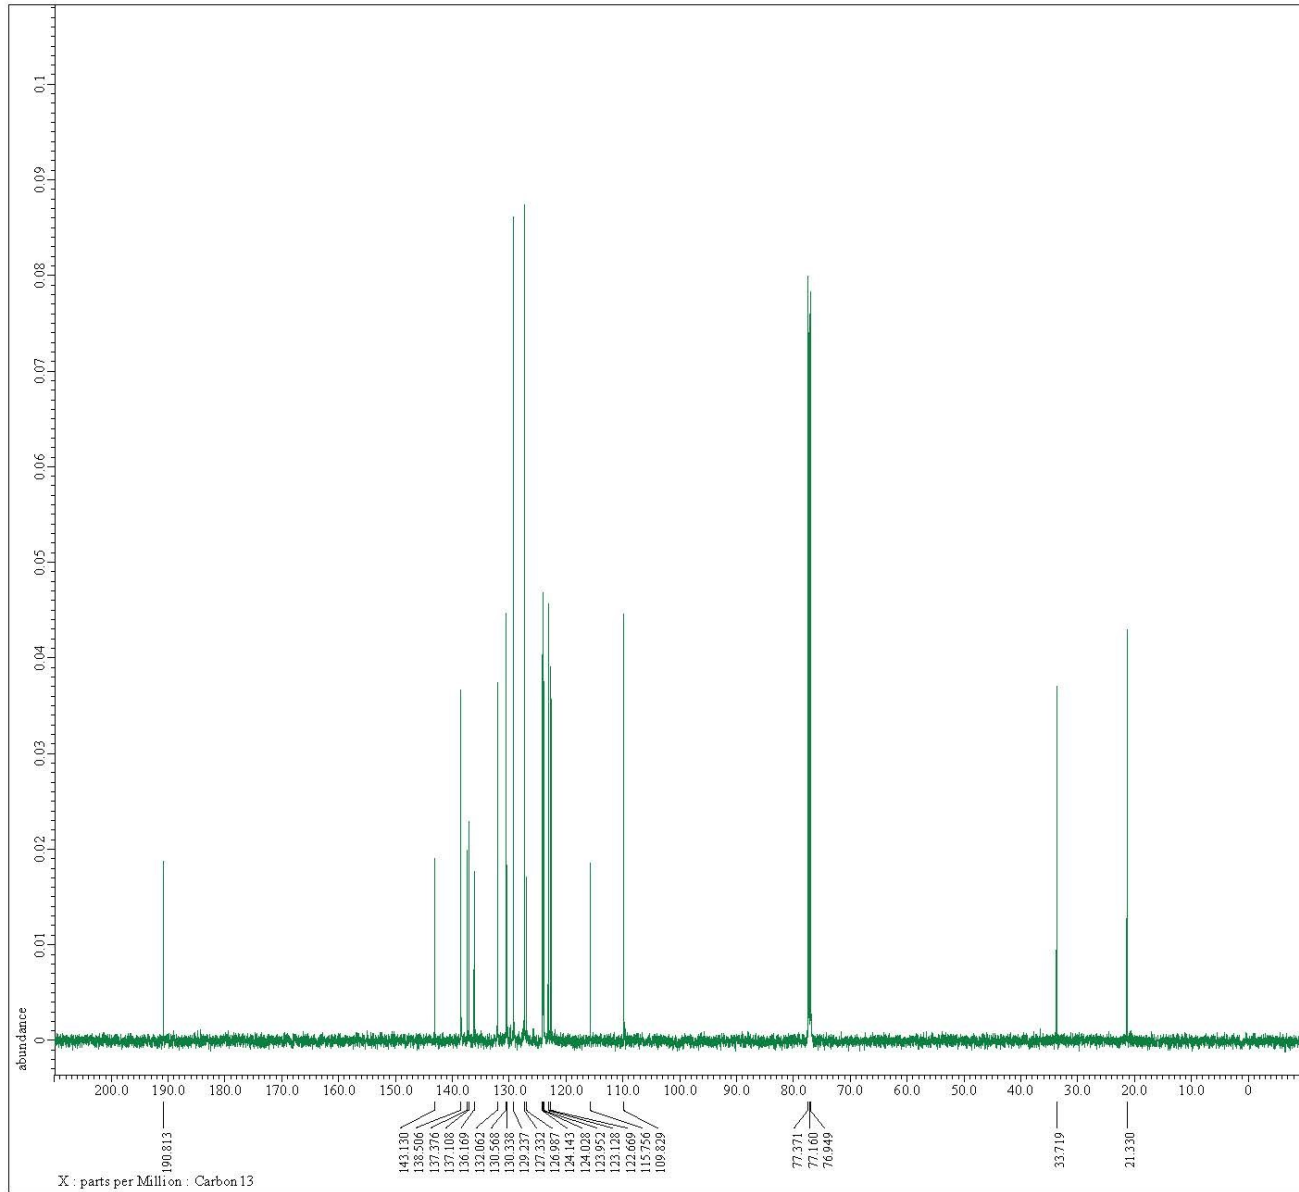



---- PROCESSING PARAMETERS ----  
sexp( 0.2[Hz], 0.0[s] )  
trapezoid( 0[Hz], 0[Hz], 80[Hz], 100[Hz] )  
zerofill( 1, TRUE )  
fft( 1, TRUE, TRUE )  
machinphase  
ppa

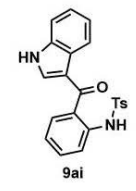

Filename = TW-6-084-2\_proton-1-3.jdf  
Author = delta  
Experiment = proton.jxp  
Sample\_id = TW-6-084-2  
Solvent = CHLOROFORM-D  
Actual\_Start\_Time = 20-APR-2024 14:51:57  
Revision\_Time = 27-MAY-2024 22:09:59  
Comment = single pulse  
Data\_Format = 1D COMPLEX  
Dim\_Size = 26214  
X\_Domain = Proton  
Dim\_Title = Proton  
Dim\_Units = [ppm]  
Dimensions = X  
Spectrometer = JNM-ECZ600R/S3  
Field\_Strength = 14.09636920(T) (600(MHz))  
X\_Acq\_Duration = 2.90455552[s]  
X\_Domain = Proton  
X\_Freq = 600.1723046(MHz)  
X\_Offset = 5[ppm]  
X\_Points = 32768  
X\_Prescans = 1  
X\_Resolution = 0.34428676[Hz]  
X\_Sweep = 11.28158845(KHz)  
X\_Sweep\_Clipped = 9.05270706(MHz)  
Irr\_Domain = Proton  
Irr\_Freq = 600.1723046(MHz)  
Irr\_Offset = 5[ppm]  
Tri\_Domain = Proton  
Tri\_Freq = 600.1723046(MHz)  
Tri\_Offset = 5[ppm]  
Blanking = 5.0[us]  
Clipped = FALSE  
Scans = 4  
Total\_Scans = 4  
Relaxation\_Delay = 10[s]  
Recvr\_Gain = 26  
Temp\_Set = 20.5[AC]  
X\_90\_Width = 9.9[us]  
X\_Acq\_Time = 2.90455552[s]  
X\_Angle = 45[deg]  
X\_Atn = 8.1[dB]  
X\_Pulse = 4.95[us]  
Irr\_Mode = Off  
Tri\_Mode = Off  
Dante\_Loop = 1000  
Dante\_Preset = FALSE  
Decimation\_Rate = 0  
Initial\_Wait = 1[s]  
Phase = (0, 90, 270, 180, 180, 270, 90, 0)  
Preset\_Time = 10[s]  
Preset\_Time\_Play = FALSE  
Relaxation\_Delay\_Calc = 0[s]  
Relaxation\_Delay\_Temp = 10[s]  
Repetition\_Time = 12.90455552[s]

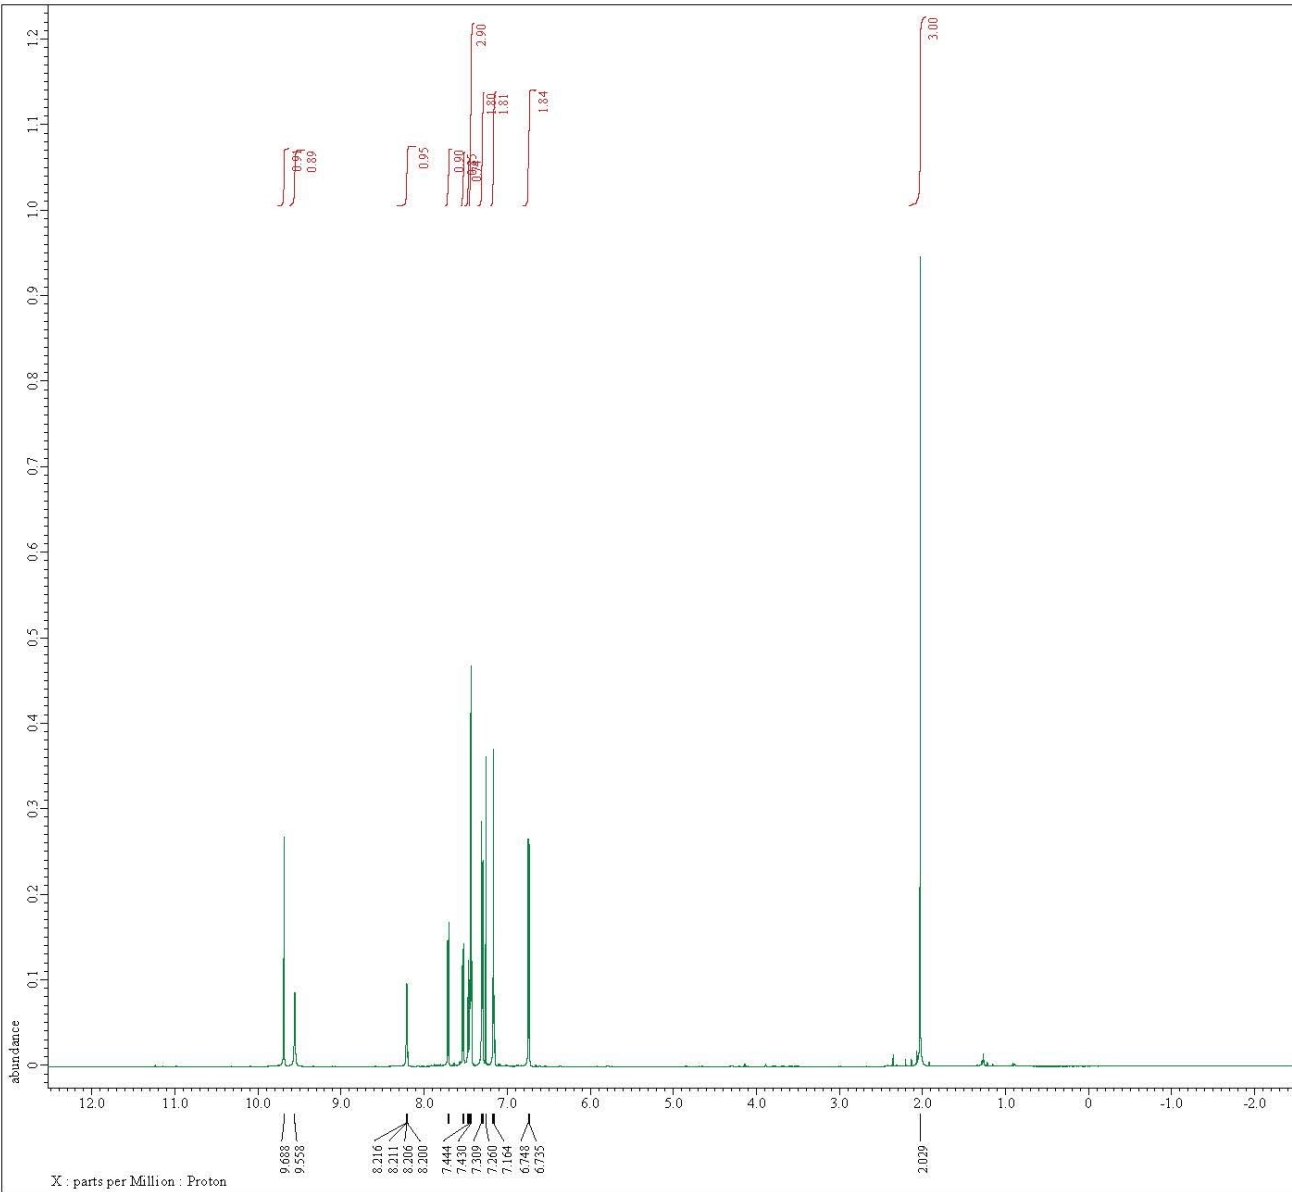





---- PROCESSING PARAMETERS ----

```
blip_cld( 16, 64, 1 )
secp( 2.0[Hz], 0.0[s] )
fft( 1, TRUE, TRUE )
machinephase
ppm
```

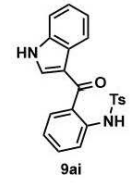

```
Filename = TK-6-084-2_carbon-1-2.jdf
Author = delta
Experiment = carbon_jsp
Sample_id = TK-6-084-2
Solvent = CHLOROFORM-D
Actual_Start_Time = 20-APR-2024 14:55:22
Revision_Time = 20-APR-2024 14:58:52

Comment = single pulse decoupled gated NOE
Data_Format = 1D COMPLEX
Dim_Size = 26214
X_Domain = Carbon13
Dim_Title = Carbon13
Dim_Units = [ppm]
Dimensions = X
Spectrometer = JNM-ECZ600R/S3

Field_Strength = 14.09636928[T] (600[MHz])
X_Acq_Duration = 0.69206016[s]
X_Domain = Carbon13
X_Freq = 150.91949039[MHz]
X_Offset = 100[ppm]
X_Points = 32768
X_Prescans = 4
X_Resolution = 1.44496109[Hz]
X_Sweep = 47.34848488[kHz]
X_Sweep_Clipped = 37.87878788[kHz]
Irr_Domain = Proton
Irr_Freq = 600.1723046[MHz]
Irr_Offset = 0[ppm]
Blanking = 15.0[us]
Clipped = FALSE
Scans = 80
Total_Scans = 80

Relaxation_Delay = 1[s]
Recvr_Gain = 56
Temp_Set = 20.0[degC]
X_P0_Width = 8.1[us]
X_Acq_Time = 0.69206016[s]
X_Angle = 90[deg]
X_Phn = 11[deg]
X_Pulse = 2.7[us]
Irr_Atn_Dec = 25.803[dB]
Irr_Atn_Dec_Calc = 25.803[dB]
Irr_Atn_Dec_Default_Calc = 25.803[dB]
Irr_Atn_Max = 25.803[dB]
Irr_Dec_Bandwidth_Hz = 7.23684211[kHz]
Irr_Dec_Bandwidth_Ppm = 12.05794078[ppm]
Irr_Dec_Freq = 600.1723046[MHz]
Irr_Dec_Merit_Factor = 2.2
Irr_Decoupling = TRUE
Irr_Noise = TRUE
Irr_Noise = WALTZ
Irr_Offset_Default = 5[ppm]
Irr_Pwidth = 76[us]
Irr_Pwidth_Default = 76[us]
Irr_Pwidth_Default_Calc = 76[us]
Irr_Pwidth_Templ = 76[us]
Irr_Wurst = FALSE
Decimation_Rate = 0
Initial_Wait = 1[s]
Noe_Time = 1[s]
Noe_Time_Play = FALSE
Relaxation_Delay_Calc = 0[s]
Relaxation_Delay_Temp = 1[s]
Repetition_Time = 1.69206016[s]
```

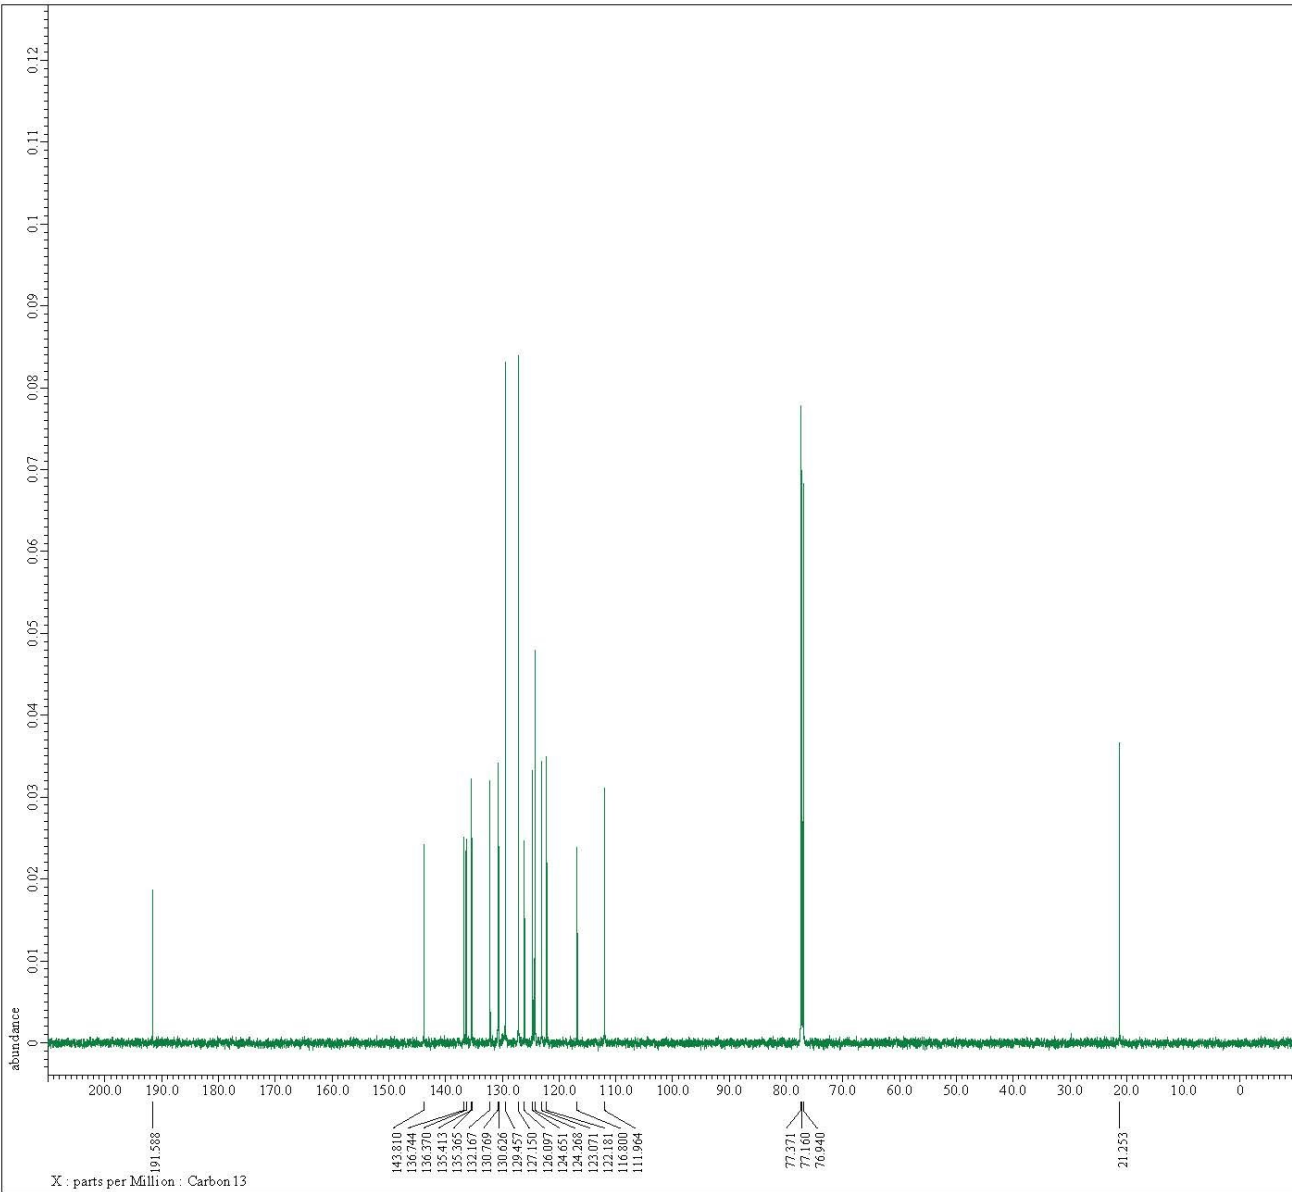



---- PROCESSING PARAMETERS ----  
sexp( 0.2[Hz], 0.0[s] )  
trapezoid( 0[Hz], 0[Hz], 80[Hz], 100[Hz] )  
zerofill( 1, TRUE )  
fft( 1, TRUE, TRUE )  
machinphase  
ppa

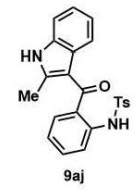

Filename = TW-6-124-3\_proton-1-3.jdf  
Author = delta  
Experiment = proton.jxp  
Sample\_id = TW-6-124-3  
Solvent = CHLOROFORM-D  
Actual\_Start\_Time = 20-JUN-2024 22:01:35  
Revision\_Time = 24-JUN-2024 22:55:18

Data Format = 1D COMPLEX  
Data Size = 26214  
X\_Domain = Proton  
Data Title = Proton  
Data Units = (ppm)  
Dimensions = X  
Spectrometer = JNM-ECZ600R/S3

Field Strength = 14.0963928(T) (600(MHz))  
X\_AcqDuration = 2.18365952(s)  
X\_Domain = Proton  
X\_Freq = 600.1723046(MHz)  
X\_Offset = 5(ppm)  
X\_Points = 32768  
X\_Prescans = 1  
X\_Resolution = 0.45794695(Hz)  
X\_Sweep = 15.0060024(KHz)  
X\_Sweep\_Clippped = 12.00480192(KHz)

Irr\_Domain = Proton  
Irr\_Freq = 600.1723046(MHz)  
Irr\_Offset = 5(ppm)  
Tri\_Domain = Proton  
Tri\_Freq = 600.1723046(MHz)  
Tri\_Offset = 5(ppm)  
Blanking = 5.0(us)  
Clipped = FALSE  
Scans = 4  
Total\_Scans = 4

Relaxation\_Delay = 2(s)  
Recvr Gain = 36  
Temp Det = 20.9(dC)  
X\_90Pulse = 9.9(us)  
X\_Acq Time = 2.18365952(s)  
X\_Angle = 45(deg)  
X\_Atn = 8.1(dB)  
X\_Pulse = 4.95(us)  
Irr\_Mode = Off  
Tri\_Mode = Off  
Dante Loop = 200  
Dante\_Preset = FALSE  
Decimation\_Rate = 0  
Initial\_Wait = 1(s)  
Phase = (0, 90, 270, 180, 180, 270, 90, 0)  
Preset\_Time = 2(s)  
Preset\_Time\_Play = FALSE  
Relaxation\_Delay\_Calc = 0(s)  
Relaxation\_Delay\_Temp = 2(s)  
Repetition\_Time = 4.18365952(s)

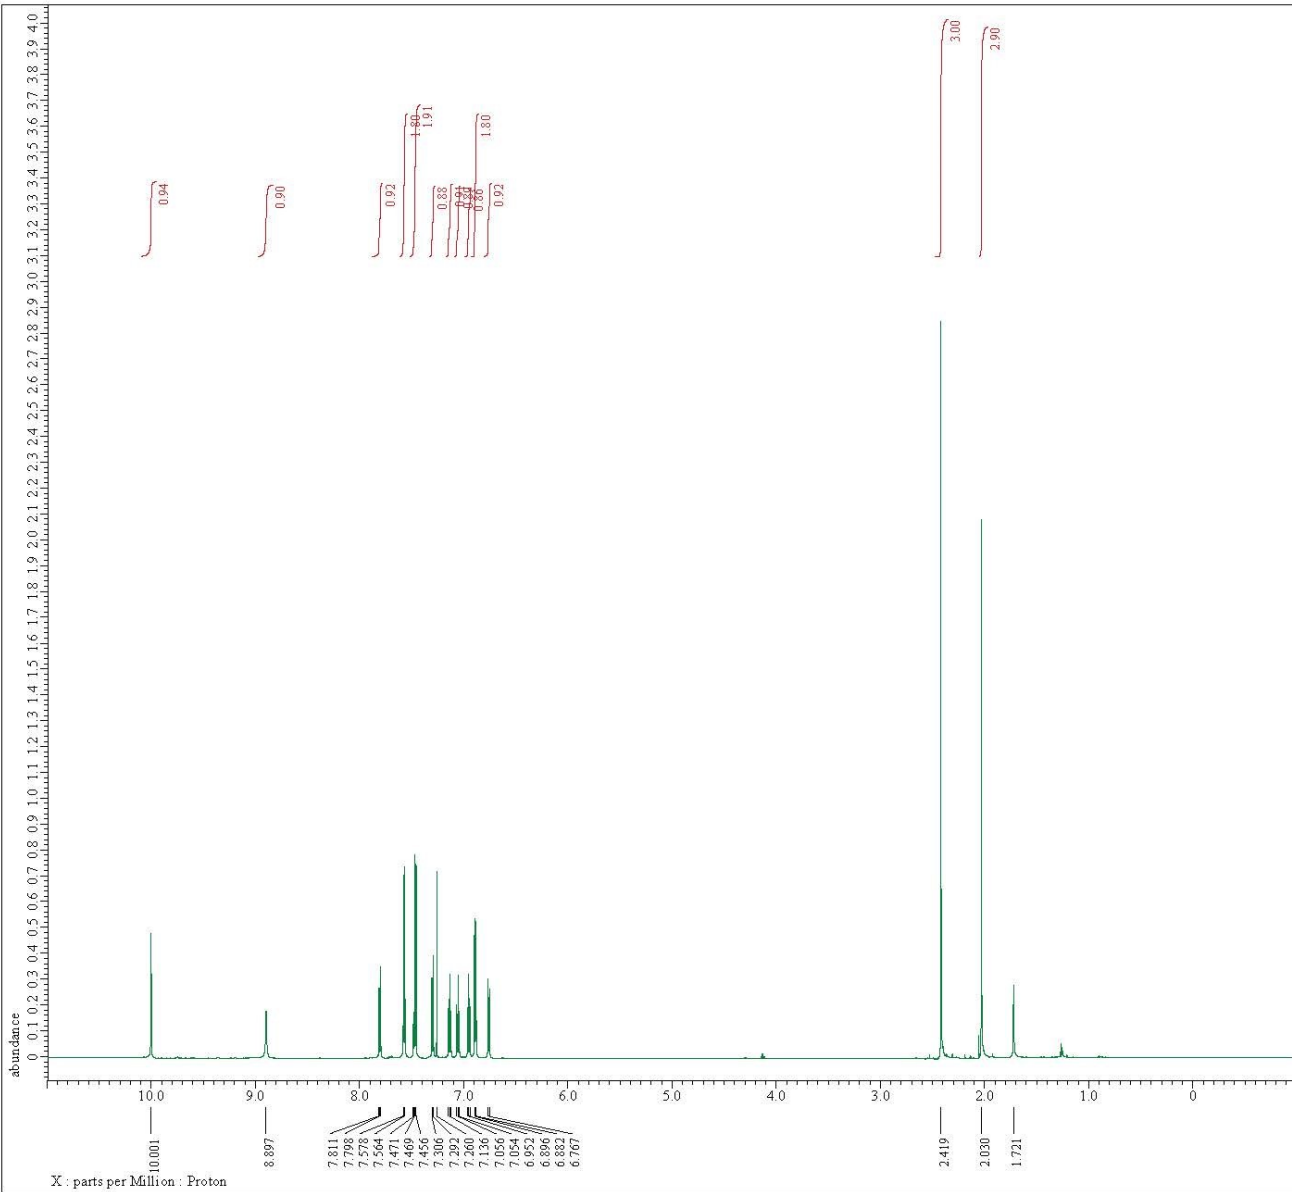



---- PROCESSING PARAMETERS ----  
blip\_cld(16, 64, 1)  
sezp( 2.0[Hz], 0.0[s])  
fit( 1, TRUE, TRUE )  
machinephase  
ppm

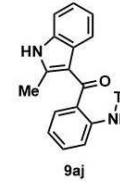

Filename = TK-6-124-3\_carbon-1-2.jdf  
Author = delta  
Experiment = carbon.jsp  
Sample Id = TK-6-124-3  
Solvent = CHLOROFORM-D  
Actual\_Start\_Time = 20-JUN-2024 22:03:43  
Revision\_Time = 20-JUN-2024 22:04:32

Data Format = 1D COMPLEX  
Dir\_Size = 2624  
X\_Domain = Carbon13  
Dir\_Title = Carbon13  
Dir\_Units = [ppm]  
Dimensions = X  
Spectrometer = JNM-ECZ600R/S3

Field\_Strength = 14.05636928[T] (600[MHz])  
X\_Acq\_Duration = 0.69206016[s]  
X\_Domain = Carbon13  
X\_Freq = 150.91343039[MHz]  
X\_Offset = 100[ppm]  
X\_Points = 32768  
X\_Prescans = 1  
X\_Resolution = 1.44496109[Hz]  
X\_Sweep = 47.34848485[kHz]  
X\_Sweep\_Clippped = 37.87878788[kHz]  
Irr\_Domain = Proton  
Irr\_Freq = 600.1723046[MHz]  
Irr\_Offset = 5[ppm]  
Blanking = 15.0[us]  
Clipped = FALSE  
Scans = 64  
Total\_Scans = 64

Relaxation\_Delay = 1[s]  
Recvr\_Gain = 56  
Temp\_Cst = 21[dC]  
X\_90\_Width = 8.1[us]  
X\_Acq\_Time = 0.69206016[s]  
X\_Angle = 30[deg]  
X\_Atn = 11[dB]  
X\_Pulse = 2.7[us]  
Irr\_Atn\_Dec = 25.803[dB]  
Irr\_Atn\_Dec\_Calc = 25.803[dB]  
Irr\_Atn\_Dec\_Default\_Calc = 25.803[dB]  
Irr\_Atn\_Noise = 25.803[dB]  
Irr\_Dec\_Bandwidth\_Hz = 7.23684211[kHz]  
Irr\_Dec\_Bandwidth\_Ppm = 12.05784078[ppm]  
Irr\_Dec\_Freq = 600.1723046[MHz]  
Irr\_Dec\_Haric\_Factor = 2.2  
Irr\_Decoupling = TRUE  
Irr\_Noise = TRUE  
Irr\_Offset\_Default = 5[ppm]  
Irr\_Pwidth = 76[us]  
Irr\_Pwidth\_Default = 76[us]  
Irr\_Pwidth\_Default\_Calc = 76[us]  
Irr\_Pwidth\_Templ = 76[us]  
Irr\_Thurst = FALSE  
Decimation\_Rate = 0  
Initial\_Wait = 1[s]  
Noe\_Time = 1[s]  
Noe\_Time\_Flag = FALSE  
Relaxation\_Delay\_Calc = 0[s]  
Relaxation\_Delay\_Temp = 1[s]  
Repetition\_Time = 1.69206016[s]

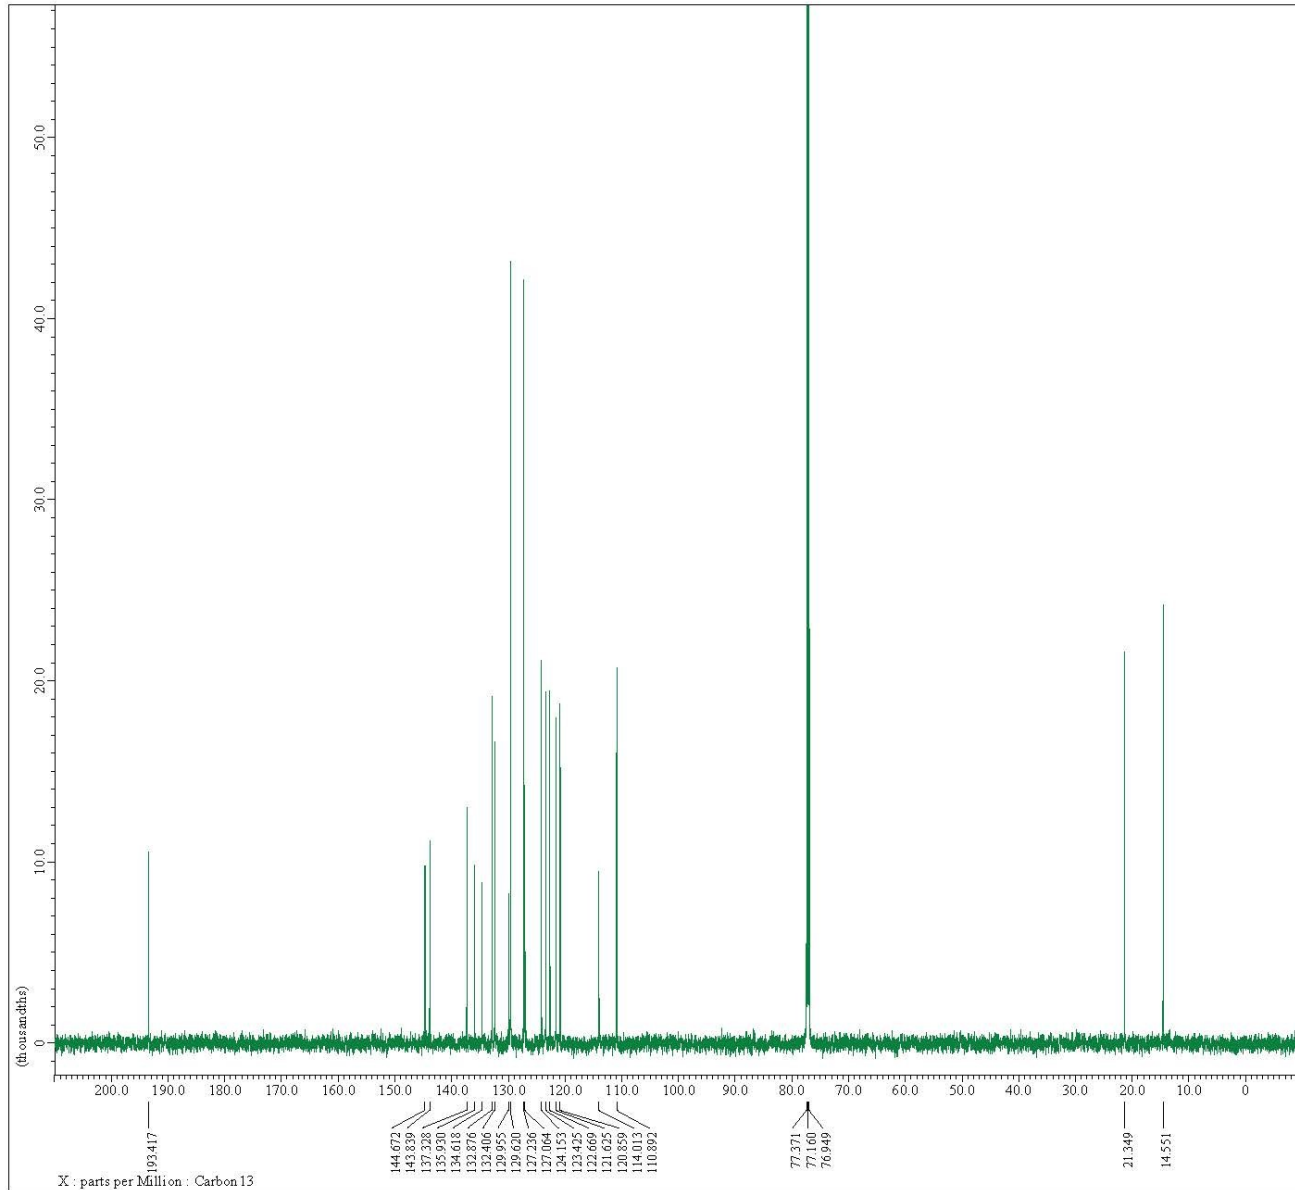



--- PROCESSING PARAMETERS ---

blip\_cld(15, 64, 1)  
secp(2.0[Hz], 0.0[s])  
fit(1, TIME, TRUE)  
machinephase  
ppm

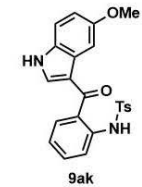

Filename = TR-6-130-5-4-3\_proton-1-3.dft  
Author = delta  
Experiment = proton.jsp  
Sample\_Id = TR-6-130-5-4-3  
Solvent = CHLOROFORM-D  
Actual\_Start\_Time = 23-JUN-2024 22:23:09  
Revision\_Time = 1-JUL-2024 23:41:44

Data Format = 1D COMPLEX  
Da Size = 26214  
X\_Domain = Proton  
Da Title = Proton  
Da Units = (ppm)  
Dimensions = X  
Spectrometer = JNM-ECZ600R/S3

Field Strength = 14.09636928[T] (600[MHz])  
X\_Acq\_Duration = 2.18365952[s]  
X\_Domain = Proton  
X\_Freq = 600.1723046[MHz]  
X\_Offset = 8[ppm]  
X\_Points = 32768  
X\_Prescans = 1  
X\_Resolution = 0.45794605[Hz]  
X\_Sweep = 15.0060024[kHz]  
X\_Sweep\_Clippped = 12.00480192[kHz]  
Irr\_Domain = Proton  
Irr\_Freq = 600.1723046[MHz]  
Irr\_Offset = 8[ppm]  
Tri\_Domain = Proton  
Tri\_Freq = 600.1723046[MHz]  
Tri\_Offset = 8[ppm]  
Blanking = 5.0[us]  
Clipped = FALSE  
Scans = 32  
Total\_Scans = 32

Relaxation\_Delay = 2[s]  
Recvr\_Gain = 36  
Temp\_Get = 20.9[dC]  
X\_90\_Width = 9.9[us]  
X\_Acq\_Time = 2.18365952[s]  
X\_Angle = 45[deg]  
X\_Atn = 8.1[dB]  
X\_Pulse = 4.35[us]  
Irr\_Mode = Off  
Tri\_Mode = Off  
Dantc\_Loop = 200  
Dantc\_Preset = FALSE  
Decimation\_Rate = 0  
Initial\_Wait = 1[s]  
Phase = (0, 90, 270, 180, 180, 270, 90, 0)  
Preset\_Time = 2[s]  
Preset\_Time\_Flag = FALSE  
Relaxation\_Delay\_Calc = 0[s]  
Relaxation\_Delay\_Temp = 2[s]  
Repetition\_Time = 4.18365952[s]

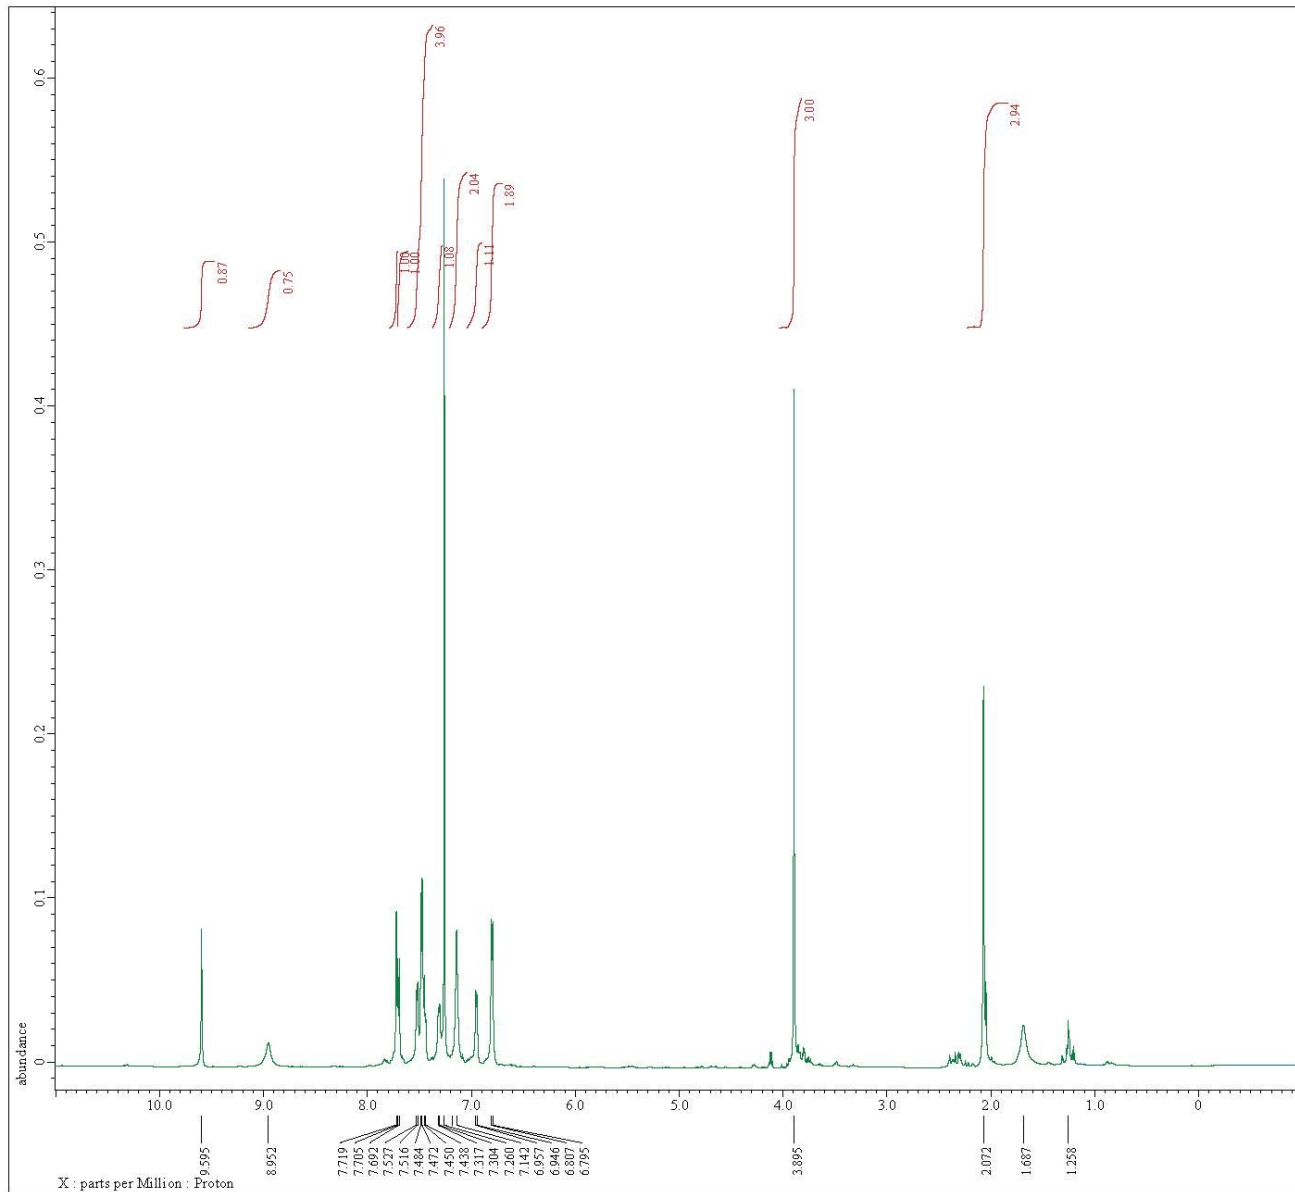



---- PROCESSING PARAMETERS ----  
blip\_cld( 16, 64, 1 )  
secp( 2.0[Hz], 0.0[s] )  
fft( 1, TRUE, TRUE )  
machinephase  
ppm

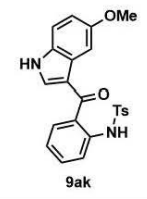

Filename = TK-6-130-5-4-3\_carbon-1-3.jdf  
Author = delta  
Experiment = carbon\_jup  
Sample\_id = TK-6-130-5-4-3  
Solvent = CHLOROFORM-D  
Actual\_Start\_Time = 29-JUN-2024 22:28:54  
Revision\_Time = 1-JUL-2024 21:28:17

Data Format = 1D COMPLEX  
Data Size = 26214  
X\_Domain = Carbon13  
Data Title = Carbon13  
Data Units = [ppm]  
Dimensions = X  
Spectrometer = JNM-ECZ600R/S3

Field Strength = 14.09636928[T] (600 [MHz])  
X\_Acq\_Duration = 0.69206016[s]  
X\_Domain = Carbon13  
X\_Freq = 150.91343039 [MHz]  
X\_Offset = 100 [ppm]  
X\_Points = 32768  
X\_Prescans = 1  
X\_Resolution = 1.44496109 [Hz]  
X\_Sweep = 47.34848485 [kHz]  
X\_Sweep\_Clippped = 37.87878788 [kHz]  
Irr\_Domain = proton  
Irr\_Freq = 600.1723046 [MHz]  
Irr\_Offset = 5 [ppm]  
Blanking = 15.0 [us]  
Clipped = FALSE  
Scans = 256  
Total\_Scans = 256

Relaxation\_Delay = 1 [s]  
Recvs\_Gain = 56  
Temp\_Dec = 20.9 [dC]  
X\_90\_Width = 0.11 [us]  
X\_Acq\_Time = 0.69206016 [s]  
X\_Angle = 30 [deg]  
X\_Am = 11 [dB]  
X\_Pulse = 2.7 [us]  
Irr\_Am\_Dec = 25.803 [dB]  
Irr\_Am\_Dec\_Calc = 25.803 [dB]  
Irr\_Am\_Dec\_Default\_Calc = 25.803 [dB]  
Irr\_Dec\_Bandwidth\_Hz = 7.23684211 [kHz]  
Irr\_Dec\_Bandwidth\_Ppm = 12.05794079 [ppm]  
Irr\_Dec\_Freq = 600.1723046 [MHz]  
Irr\_Dec\_Merit\_Factor = 2.2  
Irr\_Decoupling = TRUE  
Irr\_Noise = FALSE  
Irr\_Noise = WAITZ  
Irr\_Offset\_Default = 5 [ppm]  
Irr\_Per\_dch = 76 [us]  
Irr\_Per\_dch\_Default = 76 [us]  
Irr\_Per\_dch\_Default\_Calc = 76 [us]  
Irr\_Per\_dch\_Templ = 76 [us]  
Irr\_Wurst = FALSE  
Decimation\_Rate = 0  
Initial\_Wait = 1 [s]  
Noe\_Time = 1 [s]  
Noe\_Time\_Play = FALSE  
Relaxation\_Delay\_Calc = 0 [s]  
Relaxation\_Delay\_Temp = 1 [s]  
Repetition\_Time = 1.69206016 [s]

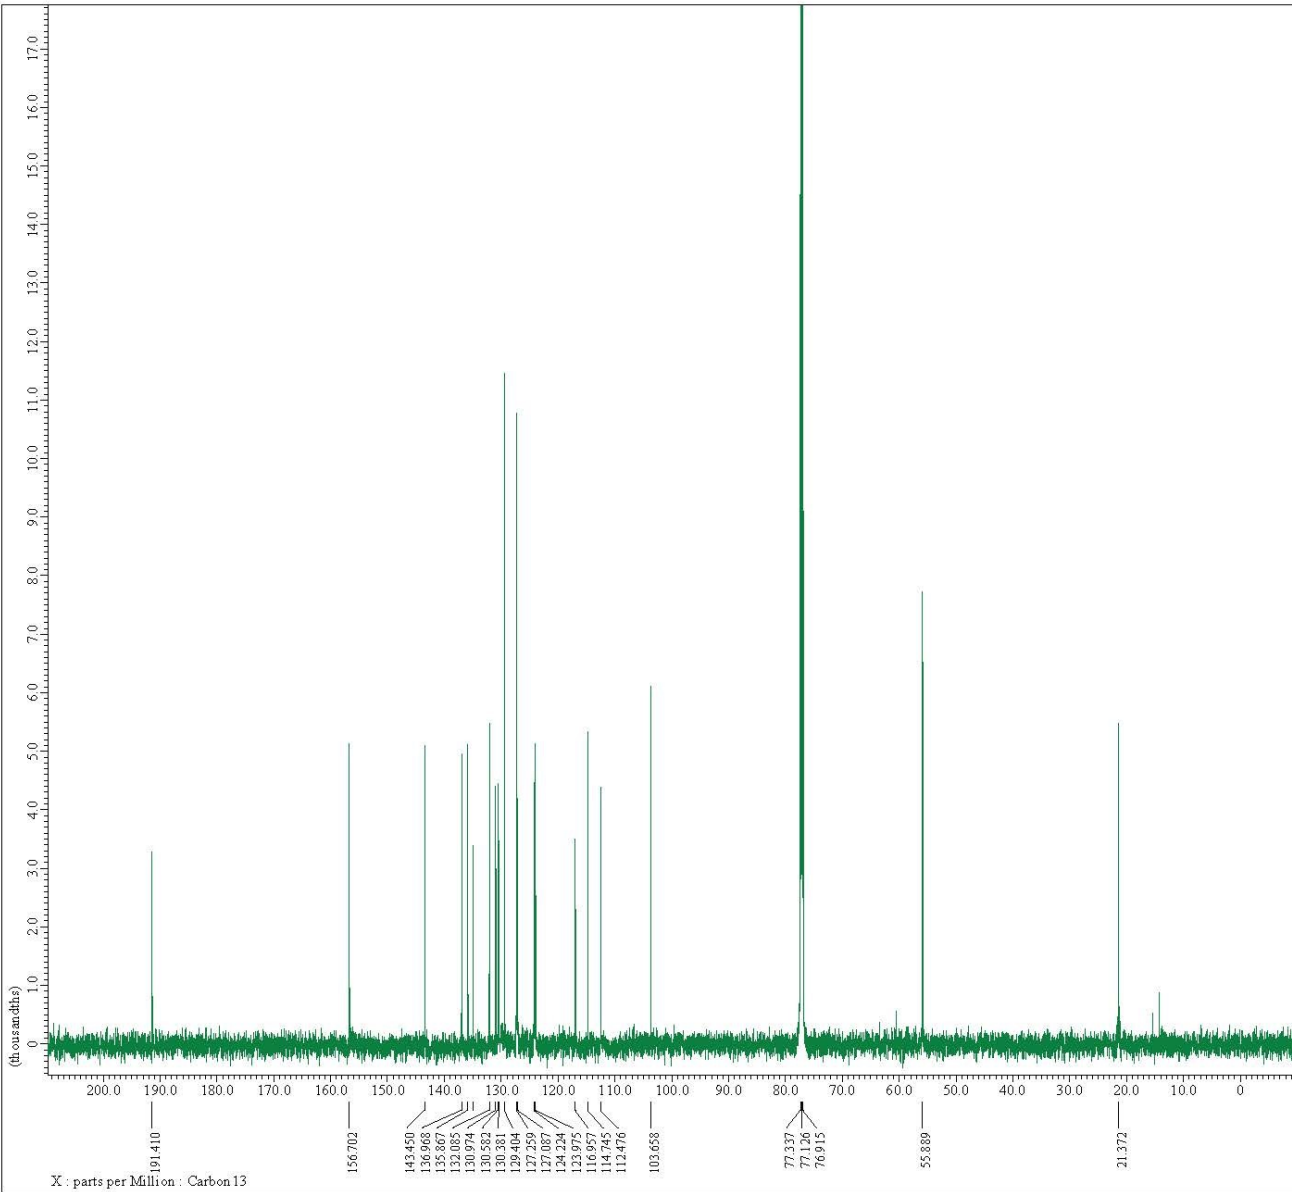

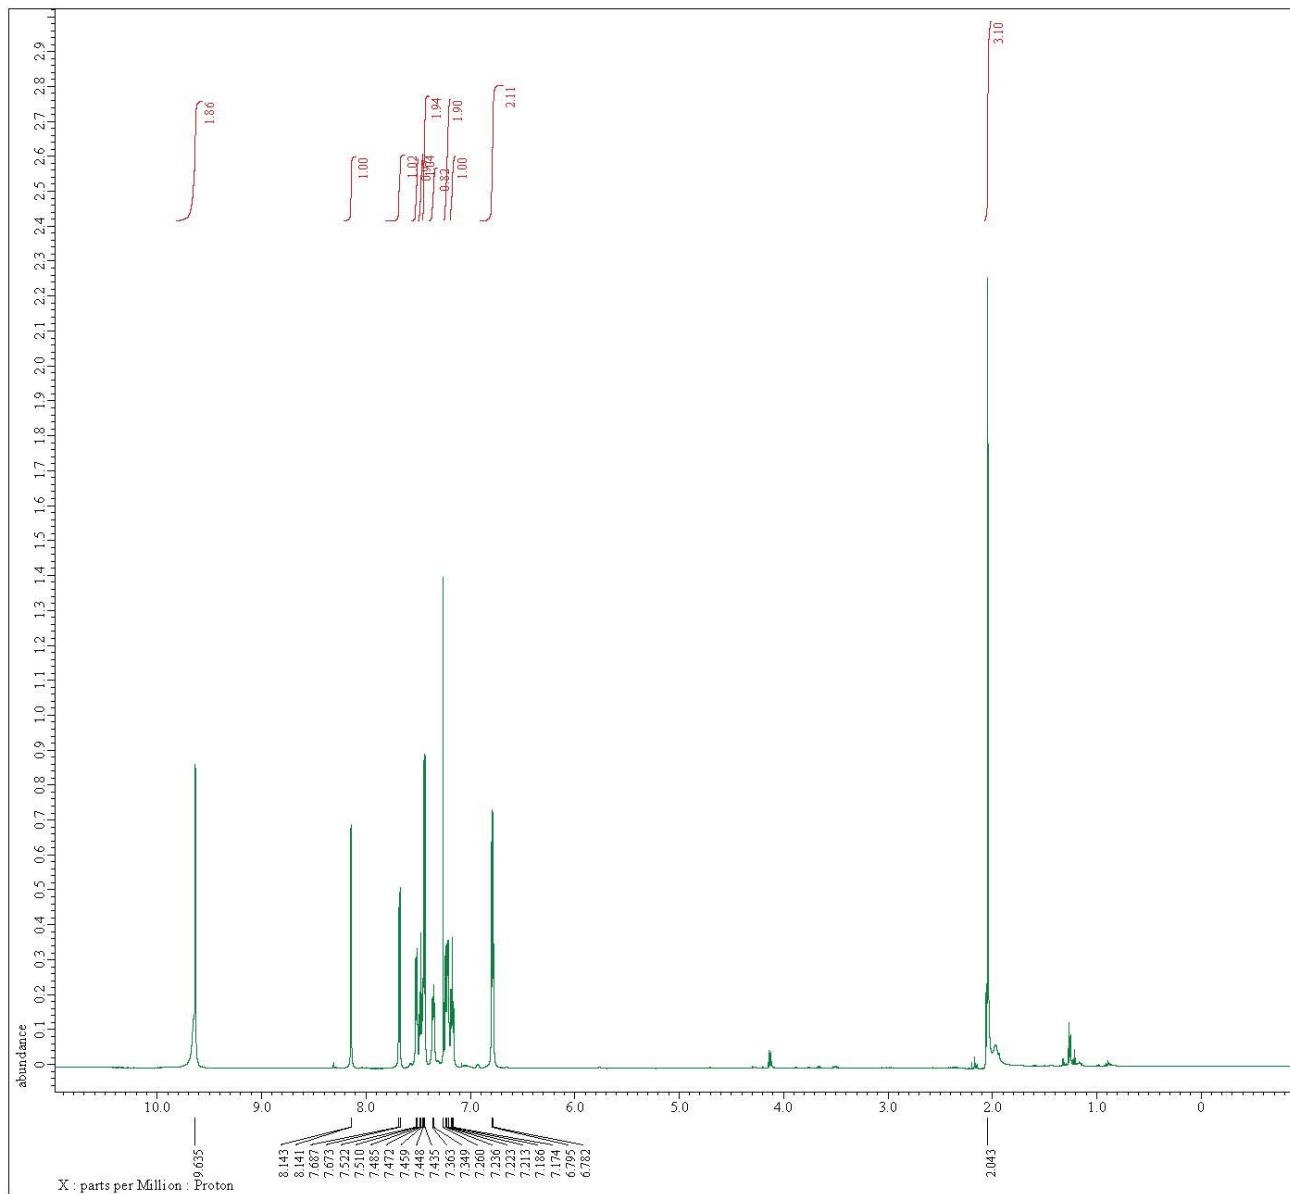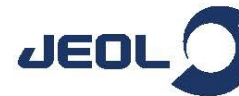

---- PROCESSING PARAMETERS ----  
 sexp( 0.2[Hz], 0.0[s] )  
 trapezoid( 0[Hz], 0[Hz], 80[Hz], 100[Hz] )  
 zerofill( 1, 1000 )  
 ifs( 1, TRUE, TRUE )  
 machinephase  
 ppm

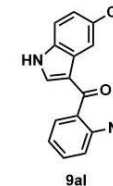

Filename = MR-6-125-1 proton-1-3.jdf  
 Author = delta  
 Experiment = proton.jsp  
 Sample\_Id = MR-6-125-1  
 Solvent = CHLOROFORM-D  
 Actual\_Start\_Time = 26-JUN-2024 22:39:20  
 Revision\_Time = 28-JUN-2024 16:33:44

Data Format = 1D COMPLEX  
 Dim\_Size = 32214  
 X\_Domain = Proton  
 Dim\_Title = Proton  
 Dim\_Units = [ppm]  
 Dimensions = X  
 Spectrometer = JNM-EZ600R/S3

Field\_Strength = 14.09636928[T] (600[MHz])  
 X\_Acq\_Duration = 2.18365952[s]  
 X\_Domain = Proton  
 X\_Freq = 600.1723046[MHz]  
 X\_Offset = 5[ppm]  
 X\_Points = 32768  
 X\_Prescans = 1  
 X\_Resolution = 0.45794685[Hz]  
 X\_Sweep = 15.0060024[kHz]  
 X\_Sweep\_Clippped = 12.00480192[kHz]  
 Itr\_Domain = Proton  
 Itr\_Freq = 600.1723046[MHz]  
 Itr\_Offset = 5[ppm]  
 Tri\_Domain = Proton  
 Tri\_Freq = 600.1723046[MHz]  
 Tri\_Offset = 5[ppm]  
 Blanking = 5.0[us]  
 Clipped = FALSE  
 Scans = 4  
 Total\_Scans = 4

Relaxation\_Delay = 2[s]  
 Recvr\_Gain = 36  
 Temp\_Set = 20.9[degC]  
 X\_90\_Width = 9.9[us]  
 X\_Acq\_Time = 2.18365952[s]  
 X\_Angle = 45[deg]  
 X\_Atn = 8.1[dB]  
 X\_Pulse = 4.95[us]  
 Itr\_Mode = Off  
 Tri\_Mode = Off  
 Dante\_Loop = 200  
 Dante\_Preset = FALSE  
 Decimation\_Rate = 0  
 Initial\_Wait = 1[s]  
 Phase = ( 0, 90, 270, 180, 180, 270, 90, 0 )  
 Preset\_Time = 2[s]  
 Preset\_Time\_Flow = FALSE  
 Relaxation\_Delay\_Calc = 0[s]  
 Relaxation\_Delay\_Temp = 2[s]  
 Repetition\_Time = 4.18365952[s]

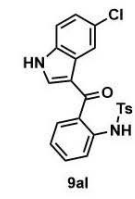

---- PROCESSING PARAMETERS ----  
blip\_cld(15, 64, 1)  
sezp(2.0[Hz], 0.0[s])  
fit(1, TRUE, TRUE)  
machinephase  
ppm

Filename = TK-6-125-1\_carbon-1-2.jdf  
Author = delta  
Experiment = carbon.jsp  
Sample Id = TK-6-125-1  
Solvent = CHLOROFORM-D  
Actual\_Start\_Time = 25-JUN-2024 22:41:24  
Revision\_Time = 25-JUN-2024 22:39:39

Data Format = 1D COMPLEX  
Dia\_Size = 2624  
X\_Domain = Carbon13  
Dia\_Title = Carbon13  
Dia\_Units = (ppm)  
Dimensions = X  
Spectrometer = JNM-ECZ600R/S3

Field\_Strength = 14.05636928(T) (600[MHz])  
X\_Acq\_Duration = 0.69206016[s]  
X\_Domain = Carbon13  
X\_Freq = 150.91343039[MHz]  
X\_Offset = 100[ppm]  
X\_Points = 32768  
X\_Prescans = 1  
X\_Resolution = 1.44496109[Hz]  
X\_Sweep = 47.34848485[kHz]  
X\_Sweep\_Clipped = 37.87878788[kHz]  
Irr\_Domain = Proton  
Irr\_Freq = 600.1723046[MHz]  
Irr\_Offset = 5[ppm]  
Blanking = 15.0[us]  
Clipped = FALSE  
Scans = 32  
Total\_Scans = 32

Relaxation\_Delay = 1[s]  
Recvr\_Gain = 56  
Temp\_Gst = 21.5[degC]  
X\_90\_Width = 8.1[us]  
X\_Acq\_Time = 0.69206016[s]  
X\_Angle = 30[deg]  
X\_Atn = 11[dB]  
X\_Pulse = 2.7[us]  
Irr\_Atn\_Dec = 25.803[dB]  
Irr\_Atn\_Dec\_Calc = 25.803[dB]  
Irr\_Atn\_Dec\_Default\_Calc = 25.803[dB]  
Irr\_Dec\_Bandwidth\_Hz = 7.23684211[kHz]  
Irr\_Dec\_Bandwidth\_Ppm = 12.05794078[ppm]  
Irr\_Dec\_Freq = 600.1723046[MHz]  
Irr\_Dec\_Merit\_Factor = 2.2  
Irr\_Decoupling = TRH  
Irr\_Noise = FALSE  
Irr\_Noise = WAIT2  
Irr\_Offset\_Default = 5[ppm]  
Irr\_Pwidth = 76[us]  
Irr\_Pwidth\_Default = 76[us]  
Irr\_Pwidth\_Default\_Calc = 76[us]  
Irr\_Pwidth\_Templ = 76[us]  
Irr\_Wurst = FALSE  
Destination\_Rate = 0  
Initial\_Wait = 1[s]  
Noe\_Time = 1[s]  
Noe\_Time\_Play = FALSE  
Relaxation\_Delay\_Calc = 0[s]  
Relaxation\_Delay\_Temp = 1[s]  
Repetition\_Time = 1.69206016[s]

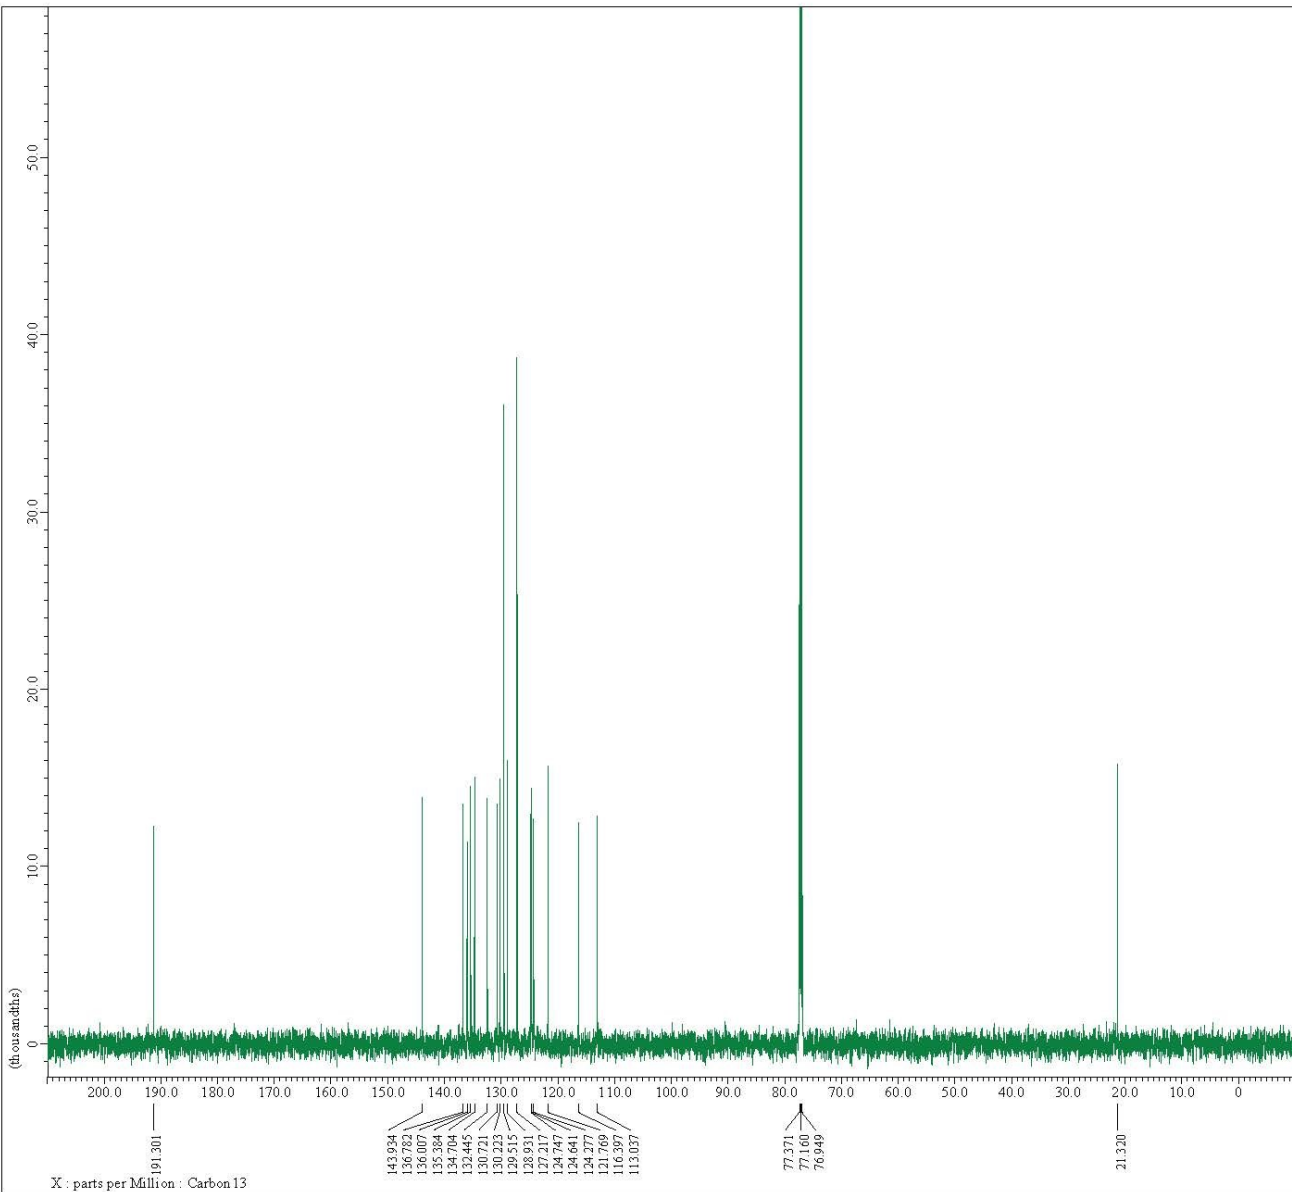

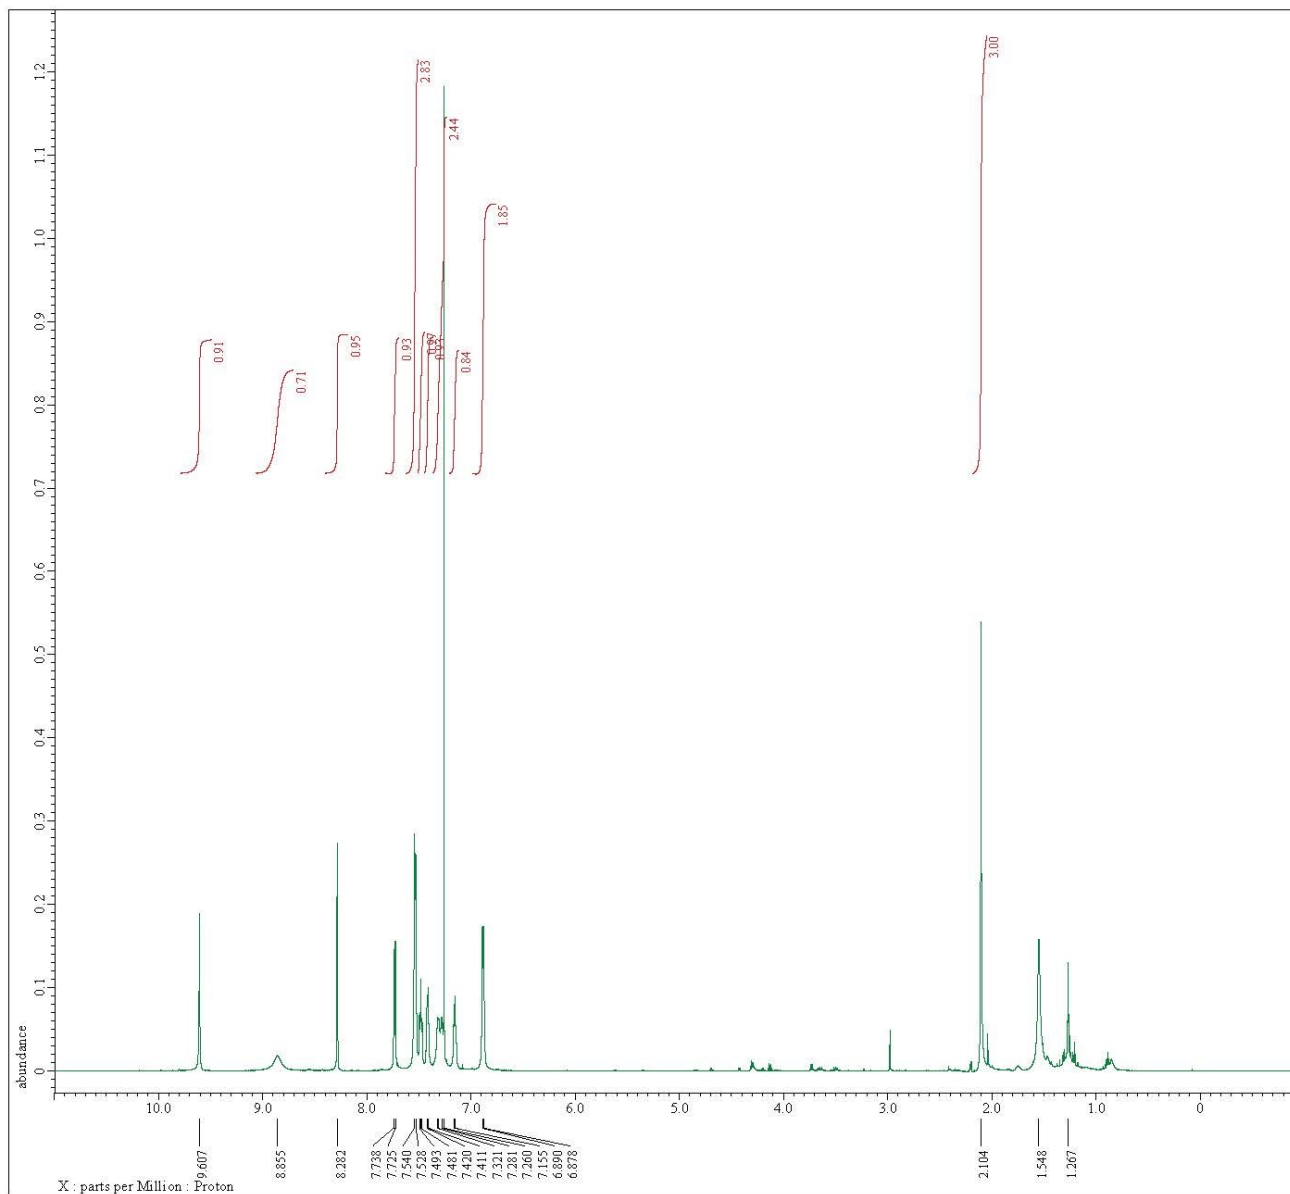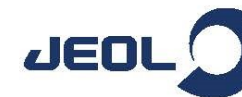

```

---- PROCESSING PARAMETERS ----
sexp( 0.2[Hz], 0.0[s] )
trapezoid( 0[%], 0[%], 80[%], 100[%] )
zerofill( 1, TRUE )
fft( 1, TRUE, TRUE )
machinesphase
ppm
base_correct( Akima, 5, 0, FALSE, 3, None, FALSE )

```

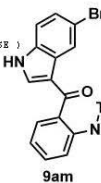

```

Filename      = TW-6-137-5-2_proton-4-3.jdf
Author        = delta
Experiment    = proton.jxp
Sample_id     = TW-6-137-5-2
Solvent       = CHLOROFORM-D
Actual_Start_Time = 1-JUL-2024 20:12:29
Revision_Time  = 1-JUL-2024 20:23:35

Data Format    = 1D REAL
Dim Size      = 26214
X_Domain      = Proton
Dim Title     = Proton
Dim Units     = (ppm)
Dimensions    = X
Spectrometer  = JNM-EZ600R/S3

Field Strength = 14.09636928[T] (600[MHz])
X_AcqDuration  = 2.18365952[s]
X_Domain       = Proton
X_Freq         = 600.1723046[MHz]
X_Offset       = 5[ppm]
X_Points       = 32768
X_Prescans    = 1
X_Resolution  = 0.45794695[Hz]
X_Sweep       = 15.0060024[KHz]
X_Sweep_Clip  = 12.00480192[KHz]
Irr_Domain    = Proton
Irr_Freq      = 600.1723046[MHz]
Irr_Offset    = 5[ppm]
Tri_Domain    = Proton
Tri_Freq      = 600.1723046[MHz]
Tri_Offset    = 8[ppm]
Blanking      = 5.0[us]
Clipped       = FALSE
Scans         = 4
Total_scans   = 4

Relaxation_Delay = 2[s]
Recvr Gain       = 46
Temp Det         = 45[dc]
X_90Pulse       = 9.9[us]
X_Acq Time      = 2.18365952[s]
X_Angle         = 45[deg]
X_Atn           = 8.1[db]
X_Pulse         = 4.95[us]
Irr_Mode        = Off
Tri_Mode        = Off
Dante Loop      = 200
Dante_Preset   = FALSE
Decimation_Rate = 0
Initial_Wait    = 1[s]
Phase           = (0, 90, 270, 180, 180, 270, 90, 0)
Preset_Time     = 2[s]
Preset_Time_Play = FALSE
Relaxation_Delay_Calc = 0[s]
Relaxation_Delay_Temp = 2[s]
Repetition_Time = 4.18365952[s]

```





---- PROCESSING PARAMETERS ----  
blip\_cld( 16, 64, 1 )  
secp( 2.0[Hz], 0.0[s] )  
fft( 1, TRUE, TRUE )  
machinephase  
ppm

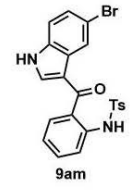

Filename = TK-6-137-1\_carbon-1-2.jdf  
Author = delta  
Experiment = carbon\_jsp  
Sample\_id = TK-6-137-1  
Solvent = CHLOROFORM-D  
Actual\_Start\_Time = 25-JUN-2024 22:56:54  
Revision\_Time = 25-JUN-2024 22:56:42

Data Format = 1D COMPLEX  
Data Size = 26214  
X\_Domain = Carbon13  
Data Title = Carbon13  
Data Units = [ppm]  
Dimensions = X  
Spectrometer = JNM-ECZ600R/S3

Field Strength = 14.09636928[T] (600 [MHz])  
X\_Acq\_Duration = 0.69206016[s]  
X\_Domain = Carbon13  
X\_Freq = 150.91343039 [MHz]  
X\_Offset = 100 [ppm]  
X\_Points = 32768  
X\_Prescans = 1  
X\_Resolution = 1.44496109 [Hz]  
X\_Sweep = 47.34848485 [kHz]  
X\_Sweep\_Clippped = 37.87878788 [kHz]  
Irr\_Domain = proton  
Irr\_Freq = 600.1723046 [MHz]  
Irr\_Offset = 5 [ppm]  
Blanking = 15.0 [us]  
Clipped = FALSE  
Scans = 64  
Total\_Scans = 64

Relaxation\_Delay = 1 [s]  
Recvs\_Gain = 56  
Temp\_Set = 20.9 [dC]  
X\_90\_Width = 0.11 [us]  
X\_Acq\_Time = 0.69206016 [s]  
X\_Angle = 30 [deg]  
X\_Am = 11 [dB]  
X\_Pulse = 2.7 [us]  
Irr\_Am\_Dec = 25.803 [dB]  
Irr\_Am\_Dec\_Calc = 25.803 [dB]  
Irr\_Am\_Dec\_Default\_Calc = 25.803 [dB]  
Irr\_Dec\_Bandwidth\_Hz = 7.23684211 [kHz]  
Irr\_Dec\_Bandwidth\_Ppm = 12.05794079 [ppm]  
Irr\_Dec\_Freq = 600.1723046 [MHz]  
Irr\_Dec\_Merit\_Factor = 2.2  
Irr\_Decoupling = TRUE  
Irr\_Noise = FALSE  
Irr\_Noise = WAIT2  
Irr\_Offset\_Default = 5 [ppm]  
Irr\_Per\_dch = 76 [us]  
Irr\_Per\_dch\_Default = 76 [us]  
Irr\_Per\_dch\_Default\_Calc = 76 [us]  
Irr\_Per\_dch\_Templ = 76 [us]  
Irr\_Wurst = FALSE  
Decimation\_Rate = 0  
Initial\_Wait = 1 [s]  
Noe\_Time = 1 [s]  
Noe\_Time\_Play = FALSE  
Relaxation\_Delay\_Calc = 0 [s]  
Relaxation\_Delay\_Temp = 1 [s]  
Repetition\_Time = 1.69206016 [s]

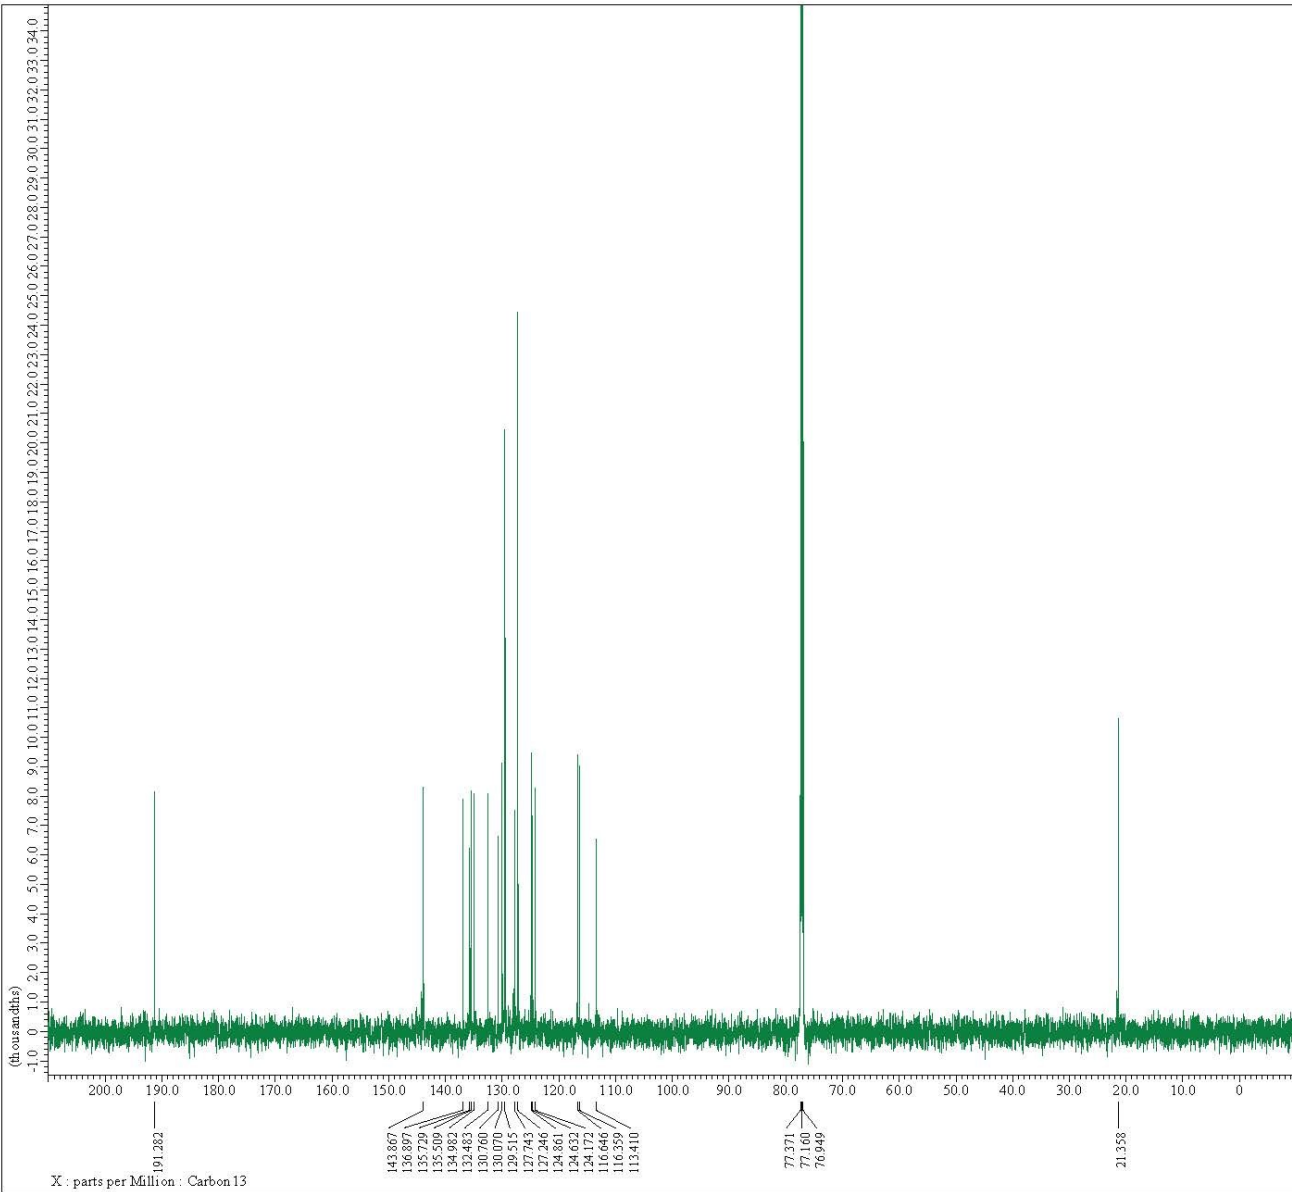

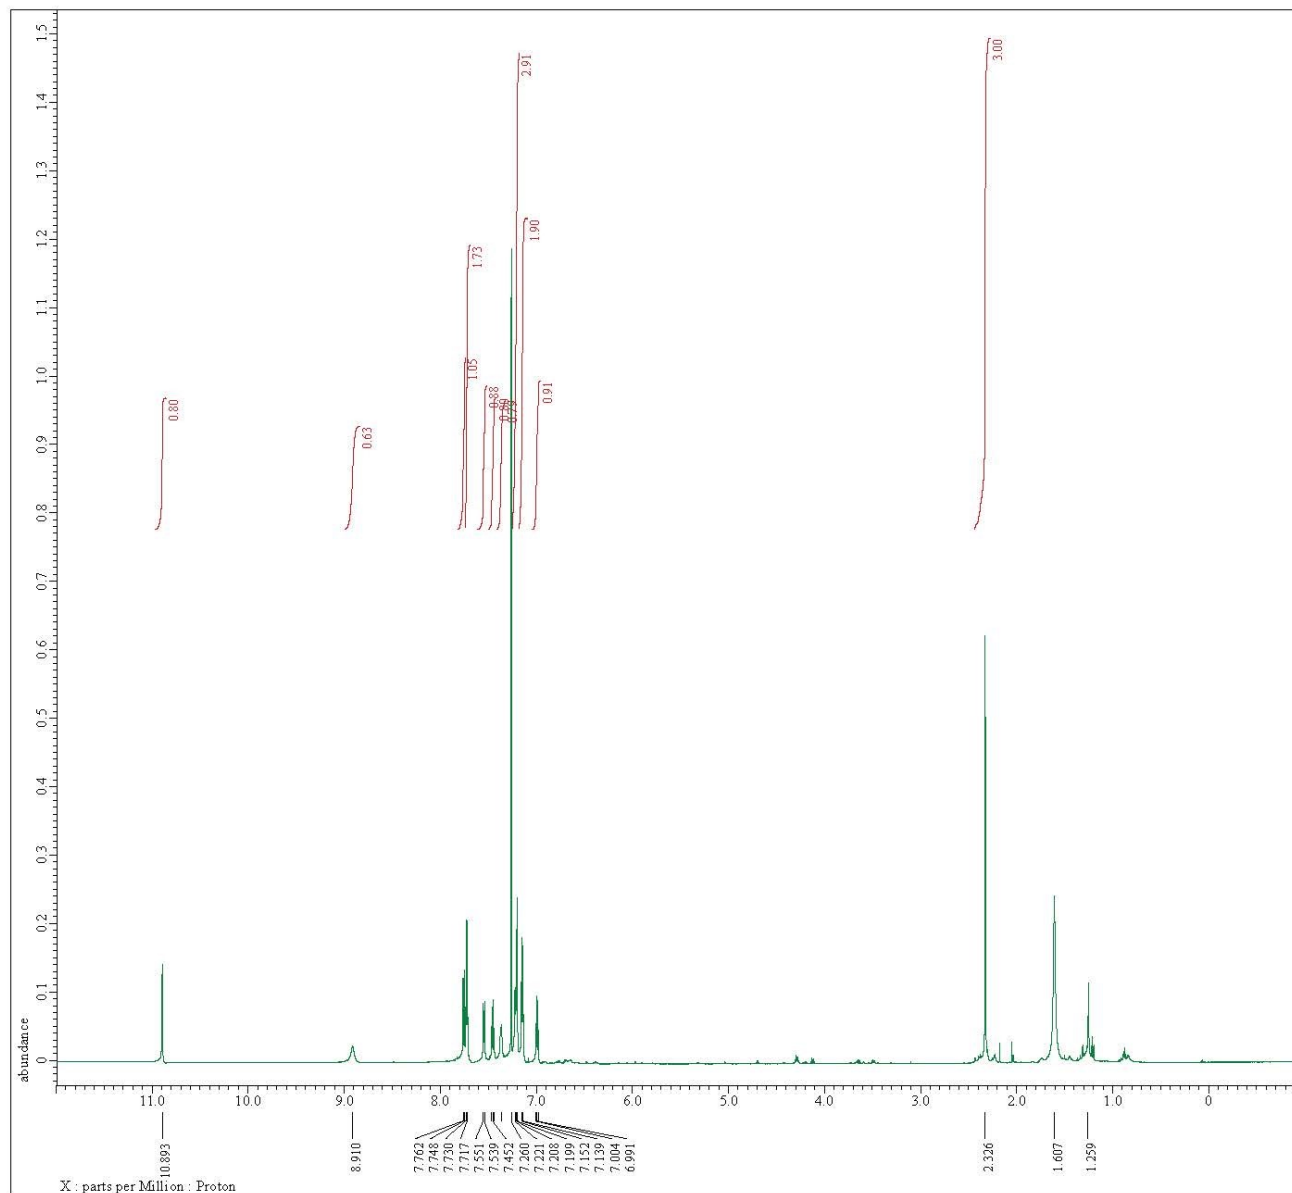

---- PROCESSING PARAMETERS ----  
 sexp( 0.2[Hz], 0.0[s] )  
 trapzoid( 0[Hz], 0[Hz], 80[Hz], 100[Hz] )  
 zerofill( 1, TRUE )  
 fft( 1, TRUE, TRUE )  
 machinphase  
 ppm

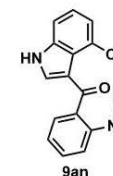

Filename = TR-6-128-5\_proton-1-3.jdf  
 Author = delta  
 Experiment = proton.jxp  
 Sample Id = TR-6-128-5  
 Solvent = CHLOROFORM-D  
 Actual\_Start\_Time = 20-JUN-2024 21:33:24  
 Revision\_Time = 25-JUN-2024 12:05:37

Data Format = 1D\_COMPLEX  
 Dia\_Size = 282.4  
 X\_Domain = Proton  
 Dia\_Title = Proton  
 Dia\_Units = (ppm)  
 Dimensions = X  
 Spectrometer = JNM-ECZ600R/S3

Field\_Strength = 14.09636928[T] (600[MHz])  
 X\_Acc\_Duration = 2.18365952[s]  
 X\_Domain = Proton  
 X\_Freq = 600.1723046[MHz]  
 X\_Offset = 8[ppm]  
 X\_Points = 32768  
 X\_Prescans = 1  
 X\_Resolution = 0.45794605[Hz]  
 X\_Sweep = 15.0060024[kHz]  
 X\_Sweep\_Clipped = 12.00480192[kHz]  
 Irf\_Domain = Proton  
 Irf\_Freq = 600.1723046[MHz]  
 Irf\_Offset = 8[ppm]  
 Tri\_Domain = Proton  
 Tri\_Freq = 600.1723046[MHz]  
 Tri\_Offset = 8[ppm]  
 Blanking = 5.0[us]  
 Clipped = FALSE  
 Scans = 4  
 Total\_Scans = 4

Relaxation\_Delay = 2[s]  
 Recvr\_Gain = 46  
 Temp\_Get = 20.7[degC]  
 X\_90\_Width = 9.9[us]  
 X\_Acc\_Time = 2.18365952[s]  
 X\_Angle = 45[deg]  
 X\_Atn = 8.1[db]  
 X\_Pulse = 4.35[us]  
 Irf\_Mode = Off  
 Tri\_Mode = Off  
 Danta\_Loop = 200  
 Danta\_Preset = FALSE  
 Decimation\_Rate = 0  
 Initial\_Wait = 1[s]  
 Phase = (0, 90, 270, 180, 180, 270, 90, 0)  
 Preset\_Time = 2[s]  
 Preset\_Time\_Flag = FALSE  
 Relaxation\_Delay\_Calc = 0[s]  
 Relaxation\_Delay\_Temp = 2[s]  
 Repetition\_Time = 4.18365952[s]



---- PROCESSING PARAMETERS ----

```
blip_cld( 16, 64, 1 )
secp( 2.0[Hz], 0.0[s] )
fft( 1, TRUE, TRUE )
machinephase
ppm
```

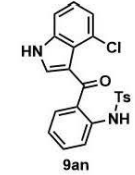

```
Filename = TK-6-128-5_carbon-1-2_jdf
Author = delta
Experiment = carbon_jep
Sample_id = TK-6-128-5
Solvent = CHLOROFORM-D
Actual_Start_Time = 20-JUN-2024 21:35:33
Revision_Time = 20-JUN-2024 21:58:37

Data_Format = 1D_COMPLEX
Data_Size = 26214
X_Domain = Carbon13
Data_Title = Carbon13
Data_Units = [ppm]
Dimensions = X
Spectrometer = JNM-ECZ600R/S3

Field_Strength = 14.09636928[T] (600[MHz])
X_Acq_Duration = 0.69206016[s]
X_Domain = Carbon13
X_Freq = 150.91343039[MHz]
X_Offset = 100[ppm]
X_Points = 32768
X_Prescans = 1
X_Resolution = 1.44496109[Hz]
X_Sweep = 47.34848485[kHz]
X_Sweep_Clipped = 37.87878788[kHz]
Irr_Domain = proton
Irr_Freq = 600.1723046[MHz]
Irr_Offset = 5[ppm]
Blanking = 15.0[us]
Clipped = FALSE
Scans = 512
Total_Scans = 512

Relaxation_Delay = 1[s]
Recvs_Gain = 56
Temp_Det = 21.1[dC]
X_90_Width = 0.11[us]
X_Acq_Time = 0.69206016[s]
X_Angle = 30[deg]
X_Am = 11[dB]
X_Pulse = 2.7[us]
Irr_Am_Dec = 25.803[dB]
Irr_Am_Dec_Calc = 25.803[dB]
Irr_Am_Dec_Default_Calc = 25.803[dB]
Irr_Am_Noise = 25.803[dB]
Irr_Dec_Bandwidth_Hz = 7.22694211[kHz]
Irr_Dec_Bandwidth_Ppm = 12.05794078[ppm]
Irr_Dec_Freq = 600.1723046[MHz]
Irr_Dec_Magic_Factor = 2.2
Irr_Decoupling = TRUE
Irr_Noise = TRUE
Irr_Offset_Default = 5[ppm]
Irr_Peakch = 76[us]
Irr_Peakch_Default = 76[us]
Irr_Peakch_Default_Calc = 76[us]
Irr_Peakch_Templ = 76[us]
Irr_Wurst = FALSE
Decimation_Rate = 0
Initial_Wait = 1[s]
Noe_Time = 1[s]
Noe_Time_Flag = FALSE
Relaxation_Delay_Calc = 0[s]
Relaxation_Delay_Temp = 1[s]
Repetition_Time = 1.69206016[s]
```

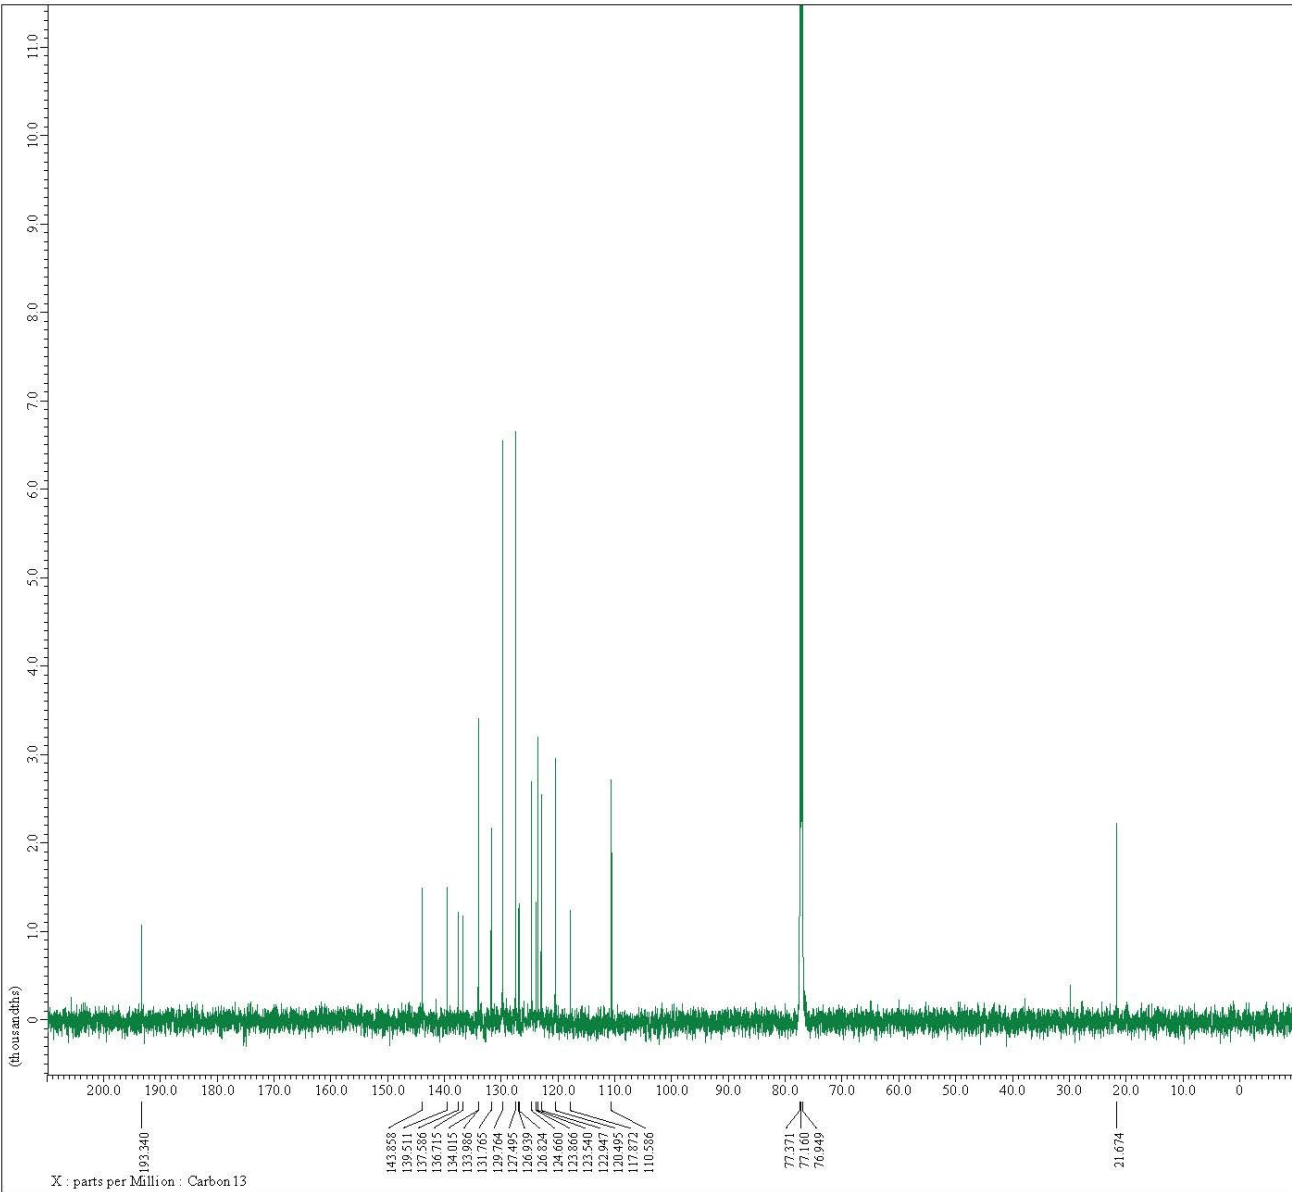



---- PROCESSING PARAMETERS ----  
sexp( 0.2[MHz], 0.0[s] )  
trapsoid( 0[Hz], 0[Hz], 80[Hz], 100[Hz] )  
zerofill( 1, TRUE )  
fit( 1, TRUE, TRUE )  
machephase  
ppm

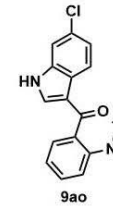

Filename = TR-6-221-1\_proton-1-3.jdf  
Author = delta  
Experiment = proton.jsp  
Sample\_Id = TR-6-221-1  
Solvent = CHLOROFORM-D  
Actual\_Start\_Time = 16-JUN-2024 20:40:54  
Revision\_Time = 17-JUN-2024 15:28:15

Data Format = 1D COMPLEX  
Da Size = 26214  
X\_Domain = Proton  
Da Title = Proton  
Da Units = (ppm)  
Dimensions = X  
Spectrometer = JNM-ECZ600R/S3

Field Strength = 14.09636928[T] (600[MHz])  
X\_Acq\_Duration = 2.18365952[s]  
X\_Domain = Proton  
X\_Freq = 600.1723046[MHz]  
X\_Offset = 8[ppm]  
X\_Points = 32768  
X\_Prescans = 1  
X\_Resolution = 0.45794605[Hz]  
X\_Sweep = 15.0060024[kHz]  
X\_Sweep\_Clippped = 12.00480192[kHz]  
Irr\_Domain = Proton  
Irr\_Freq = 600.1723046[MHz]  
Irr\_Offset = 8[ppm]  
Tri\_Domain = Proton  
Tri\_Freq = 600.1723046[MHz]  
Tri\_Offset = 8[ppm]  
Blanking = 5.0[us]  
Clipped = FALSE  
Scans = 4  
Total\_Scans = 4

Relaxation\_Delay = 2[s]  
Recvr\_Gain = 36  
Temp\_Get = 20.8[degC]  
X\_90\_Width = 9.9[us]  
X\_Acq\_Time = 2.18365952[s]  
X\_Angle = 45[deg]  
X\_Atn = 8.1[db]  
X\_Pulse = 4.35[us]  
Irr\_Mode = Off  
Tri\_Mode = Off  
Dante\_Loop = 200  
Dante\_Preset = FALSE  
Decimation\_Rate = 0  
Initial\_Wait = 1[s]  
Phase = (0, 90, 270, 180, 180, 270, 90, 0)  
Preset\_Time = 2[s]  
Preset\_Time\_Flag = FALSE  
Relaxation\_Delay\_Calc = 0[s]  
Relaxation\_Delay\_Temp = 2[s]  
Repetition\_Time = 4.18365952[s]

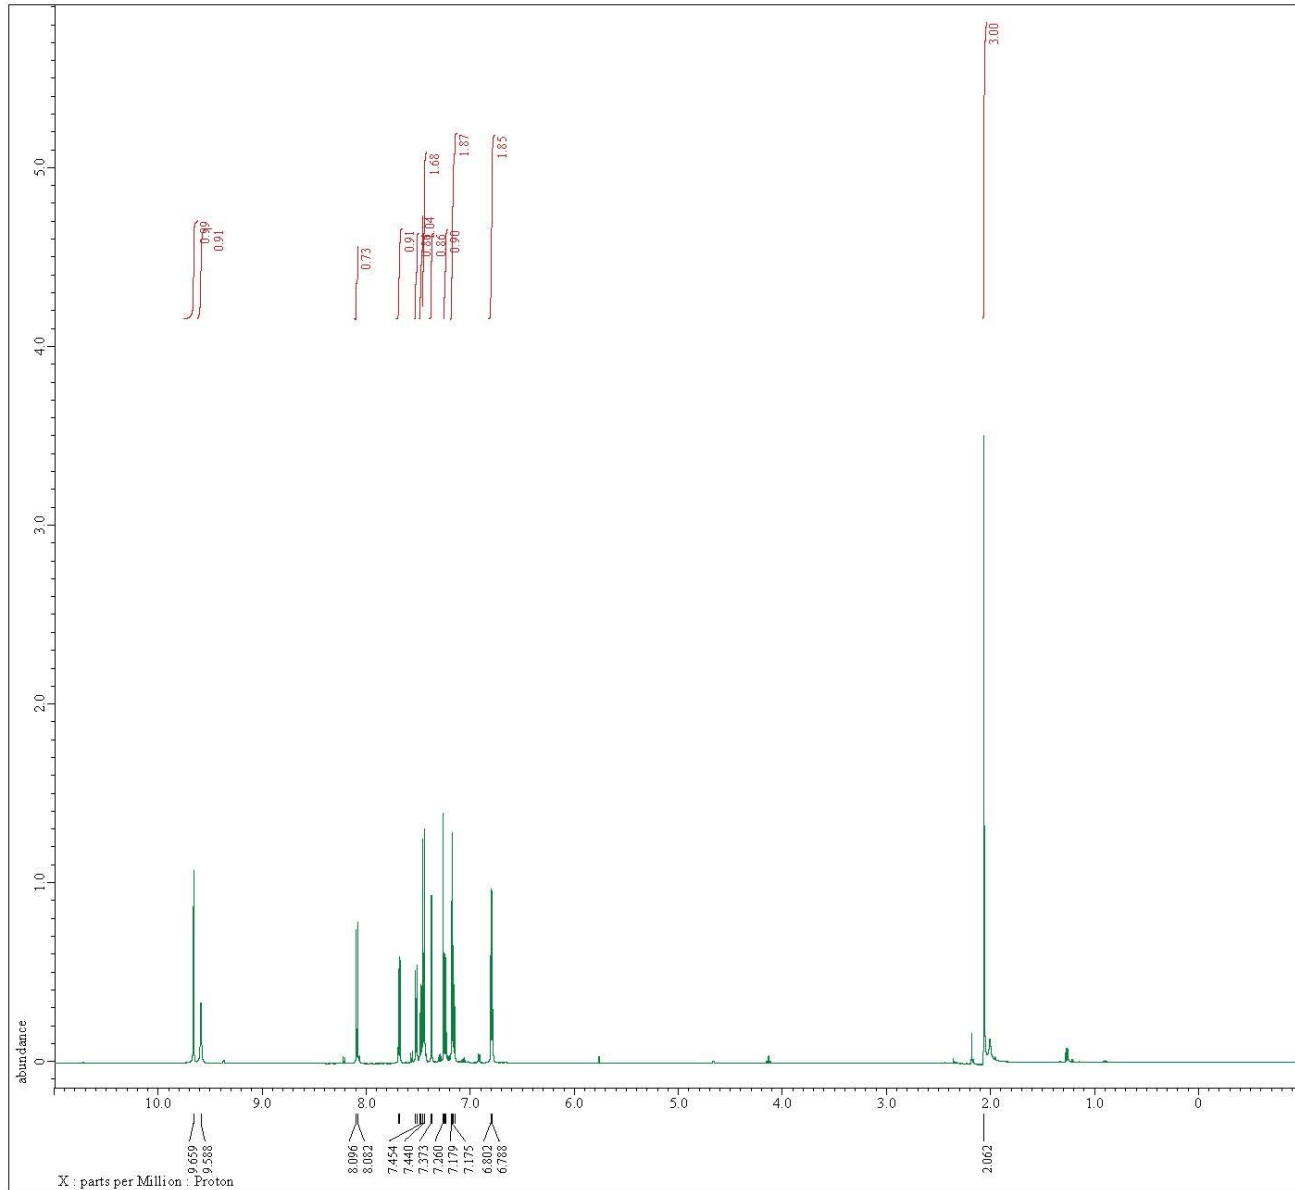

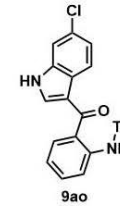

---- PROCESSING PARAMETERS ----

```
blip_cld( 16, 64, 1 )
secp( 2.0[MHz], 0.0[s] )
fft( 1, TRUE, TRUE )
machinephase
ppm
```

```
Filename = TK-6-221-1_carbon-1-2.jdf
Author = delta
Experiment = carbon_jsp
Sample_id = TK-6-221-1
Solvent = CHLOROFORM-D
Actual_Start_Time = 16-JUN-2024 20:43:03
Revision_Time = 16-JUN-2024 20:42:07

Data_Format = 1D_COMPLEX
Data_Size = 26214
X_Domain = Carbon13
Data_Title = Carbon13
Data_Units = [ppm]
Dimensions = X
Spectrometer = JNM-ECZ600R/S3

Field_Strength = 14.09636928[T] (600[MHz])
X_Acq_Duration = 0.69206016[s]
X_Domain = Carbon13
X_Freq = 150.91343039[MHz]
X_Offset = 100[ppm]
X Points = 32768
X_Prescans = 1
X_Resolution = 1.44496109[Hz]
X_Sweep = 47.34848485[kHz]
X_Sweep_Clipped = 37.87878788[kHz]
Irr_Domain = Proton
Irr_Freq = 600.1723046[MHz]
Irr_Offset = 5[ppm]
Blanking = 15.0[us]
Clipped = FALSE
Scans = 45
Total_Scans = 45

Relaxation_Delay = 1[s]
Recvs_Gain = 16
Temp_Det = 21.1[dC]
X_90_Width = 0.11[us]
X_Acq_Time = 0.69206016[s]
X_Angle = 30[deg]
X_Am = 11[dB]
X_Pulse = 2.7[us]
Irr_Am_Dec = 25.803[dB]
Irr_Am_Dec_Calc = 25.803[dB]
Irr_Am_Dec_Default_Calc = 25.803[dB]
Irr_Am_Noise = 25.803[dB]
Irr_Dec_Bandwidth_Hz = 7.22694211[kHz]
Irr_Dec_Bandwidth_Ppm = 12.05794078[ppm]
Irr_Dec_Freq = 600.1723046[MHz]
Irr_Dec_Magic_Factor = 2.2
Irr_Decoupling = TRUE
Irr_Noise = TRUE
Irr_Offset_Default = 5[ppm]
Irr_Peakch = 76[us]
Irr_Peakch_Default = 76[us]
Irr_Peakch_Default_Calc = 76[us]
Irr_Peakch_Templ = 76[us]
Irr_Wurst = FALSE
Decimation_Rate = 0
Initial_Wait = 1[s]
Noe_Time = 1[s]
Noe_Time_Flag = FALSE
Relaxation_Delay_Calc = 0[s]
Relaxation_Delay_Temp = 1[s]
Repetition_Time = 1.69206016[s]
```

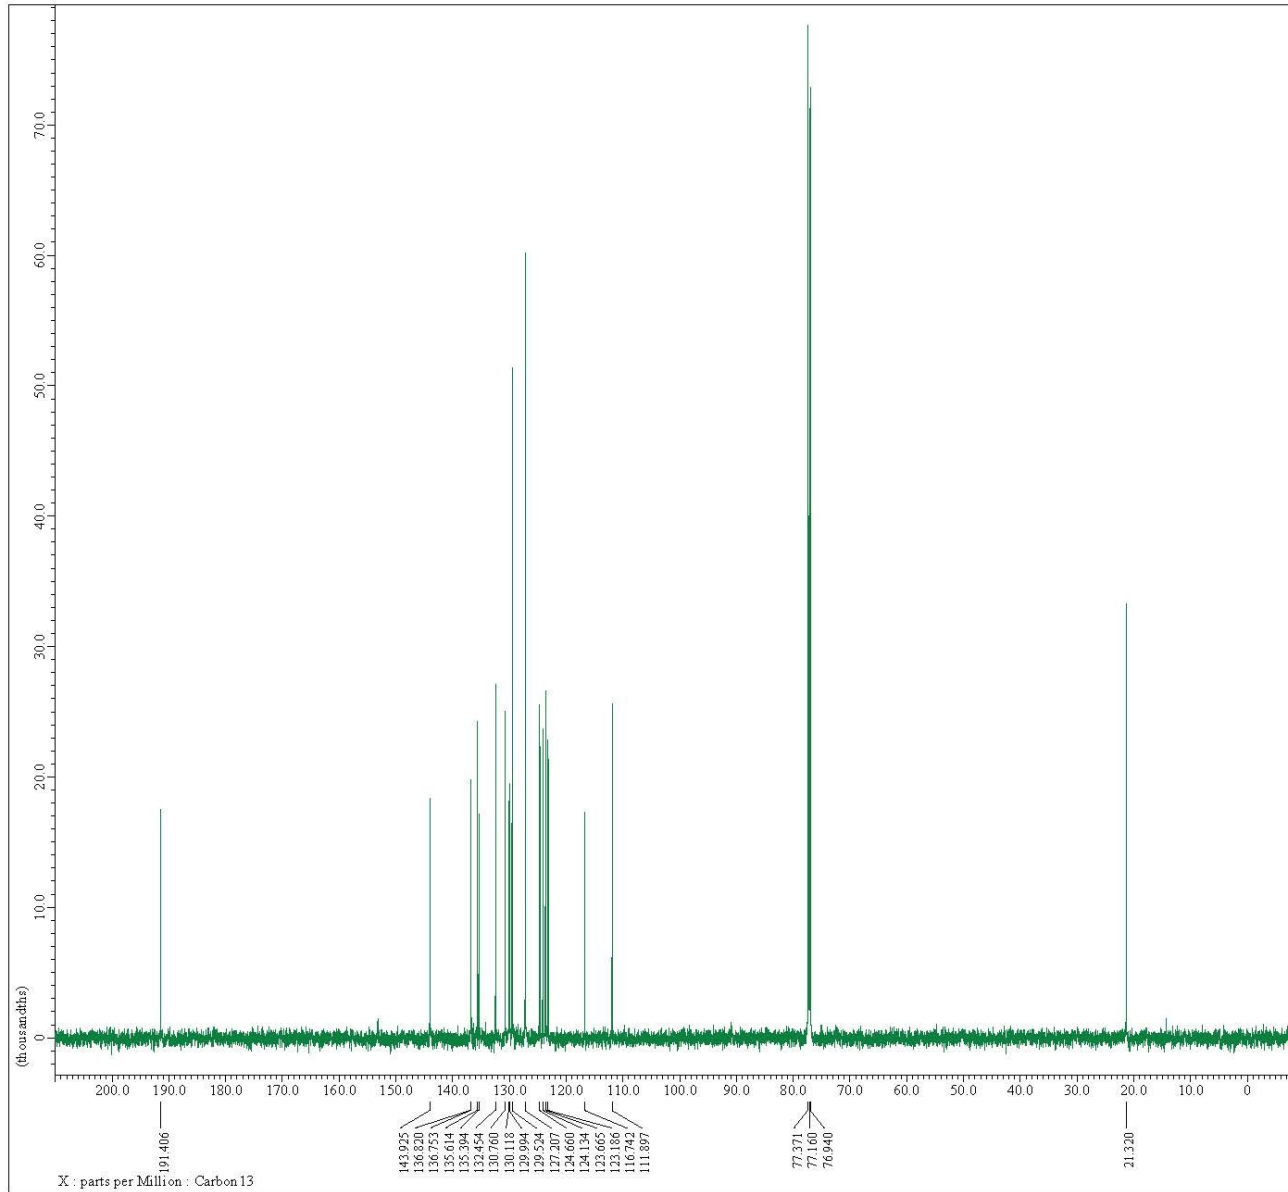

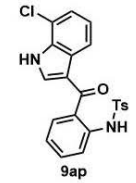

---- PROCESSING PARAMETERS ----  
sexp( 0.2[MHz], 0.0[s] )  
trapezoid( 0[Hz], 0[Hz], 80[Hz], 100[Hz] )  
zerofill( 1, TRUE )  
fft( 1, TRUE, TRUE )  
machephase  
ppm

Filename = TR-6-193-5\_proton-1-3.jdf  
Author = delta  
Experiment = proton.jxp  
Sample\_Id = TR-6-193-5  
Solvent = CHLOROFORM-D  
Actual\_Start\_Time = 25-JUN-2024 22:46:19  
Revision\_Time = 26-JUN-2024 12:46:57

Data Format = 1D COMPLEX  
Da Size = 26214  
X\_Domain = Proton  
Da Title = Proton  
Da Units = (ppm)  
Dimensions = X  
Spectrometer = JNM-ECZ600R/S3

Field Strength = 14.09636928[T] (600[MHz])  
X\_Acq\_Duration = 2.18365952[s]  
X\_Domain = Proton  
X\_Freq = 600.1723046[MHz]  
X\_Offset = 8[ppm]  
X\_Points = 32768  
X\_Prescans = 1  
X\_Resolution = 0.45794605[Hz]  
X\_Sweep = 15.0060024[kHz]  
X\_Sweep\_Clippped = 12.00480192[kHz]  
Irr\_Domain = Proton  
Irr\_Freq = 600.1723046[MHz]  
Irr\_Offset = 8[ppm]  
Tri\_Domain = Proton  
Tri\_Freq = 600.1723046[MHz]  
Tri\_Offset = 8[ppm]  
Blanking = 5.0[us]  
Clipped = FALSE  
Scans = 4  
Total\_Scans = 4

Relaxation\_Delay = 2[s]  
Recvr\_Gain = 36  
Temp\_Get = 22[degC]  
X\_90\_Width = 9.9[us]  
X\_Acq\_Time = 2.18365952[s]  
X\_Angle = 45[deg]  
X\_Atn = 8.1[dB]  
X\_Pulse = 4.35[us]  
Irr\_Mode = Off  
Tri\_Mode = Off  
Data\_Loop = 200  
Data\_Preset = FALSE  
Decimation\_Rate = 0  
Initial\_Wait = 1[s]  
Phase = (0, 90, 270, 180, 180, 270, 90, 0)  
Preset\_Time = 2[s]  
Preset\_Time\_Flag = FALSE  
Relaxation\_Delay\_Calc = 0[s]  
Relaxation\_Delay\_Temp = 2[s]  
Repetition\_Time = 4.18365952[s]

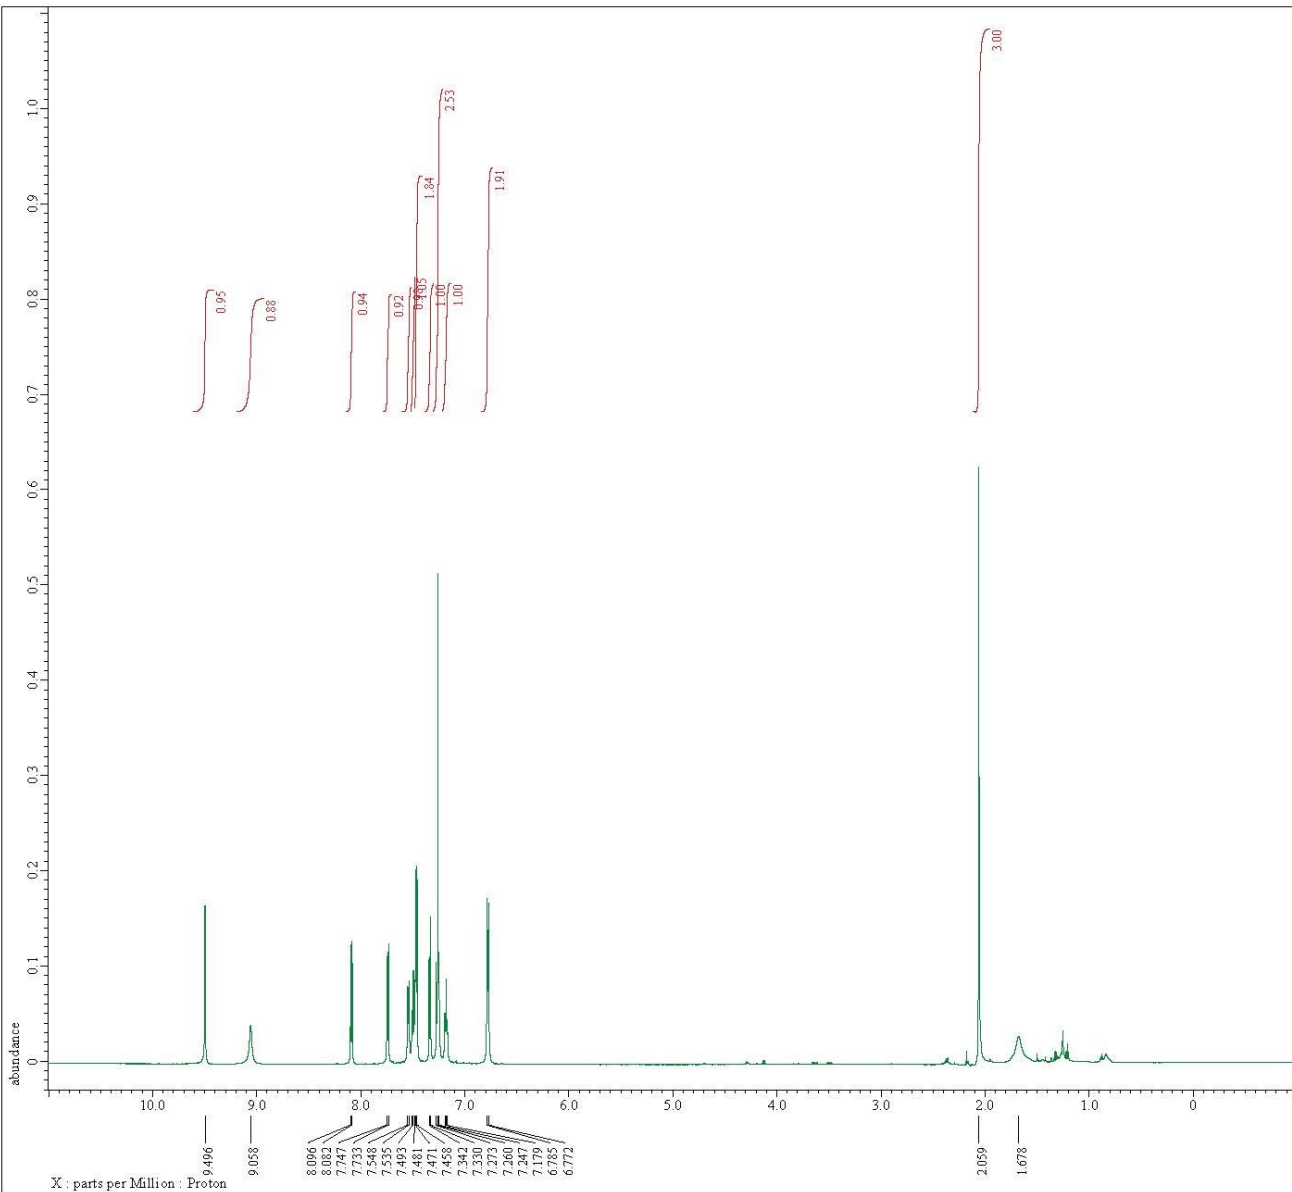



---- PROCESSING PARAMETERS ----  
blip\_cld(15, 64, 1)  
sezp(2.0[Hz], 0.0[s])  
fit(1, TRUE, TRUE)  
machinephase  
ppm

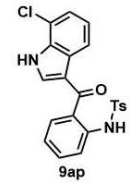

Filename = TK-6-133-5\_carbon-1-2.jdf  
Author = delta  
Experiment = carbon\_jsp  
Sample Id = TK-6-133-5  
Solvent = CHLOROFORM-D  
Actual\_Start\_Time = 25-JUN-2024 22:48:25  
Revision\_Time = 25-JUN-2024 22:49:12

Data Format = 1D COMPLEX  
Dir Size = 2624  
X\_Domain = Carbon13  
Dir Title = Carbon13  
Dir Units = (ppm)  
Dimensions = X  
Spectrometer = JNM-ECZ600R/S3

Field Strength = 14.05636928(T) (600(MHz))  
X\_Acq\_Duration = 0.69206016[s]  
X\_Domain = Carbon13  
X\_Freq = 150.91343039(MHz)  
X\_Offset = 100[ppm]  
X\_Points = 32768  
X\_Prescans = 1  
X\_Resolution = 1.44496109(Hz)  
X\_Sweep = 47.34848485(kHz)  
X\_Sweep\_Clippped = 37.87878788(kHz)  
Irr\_Domain = Proton  
Irr\_Freq = 600.1723046(MHz)  
Irr\_Offset = 5[ppm]  
Blanking = 15.0[us]  
Clipped = FALSE  
Scans = 64  
Total\_Scans = 64

Relaxation\_Delay = 1[s]  
Recvr\_Gain = 55  
Temp\_Get = 21.3(dC)  
X\_90\_Width = 6.1[us]  
X\_Acq\_Time = 0.69206016[s]  
X\_Angle = 30(deg)  
X\_Atn = 11(dB)  
X\_Pulse = 2.7[us]  
Irr\_Atn\_Dec = 25.803(dB)  
Irr\_Atn\_Dec\_Calc = 25.803(dB)  
Irr\_Atn\_Dec\_Default\_Calc = 25.803(dB)  
Irr\_Dec\_Bandwidth\_Hz = 7.23684211(kHz)  
Irr\_Dec\_Bandwidth\_Ppm = 12.05794078[ppm]  
Irr\_Dec\_Freq = 600.1723046(MHz)  
Irr\_Dec\_Merit\_Factor = 2.2  
Irr\_Decoupling = TRUE  
Irr\_Noise = FALSE  
Irr\_Offset\_Default = WAIT2  
Irr\_Pwidth = 76[us]  
Irr\_Pwidth\_Default = 76[us]  
Irr\_Pwidth\_Default\_Calc = 76[us]  
Irr\_Pwidth\_Templ = 76[us]  
Irr\_Wurst = FALSE  
Destination\_Rate = 0  
Initial\_Wait = 1[s]  
Noe\_Time = 1[s]  
Noe\_Time\_Play = FALSE  
Relaxation\_Delay\_Calc = 0[s]  
Relaxation\_Delay\_Temp = 1[s]  
Repetition\_Time = 1.69206016[s]

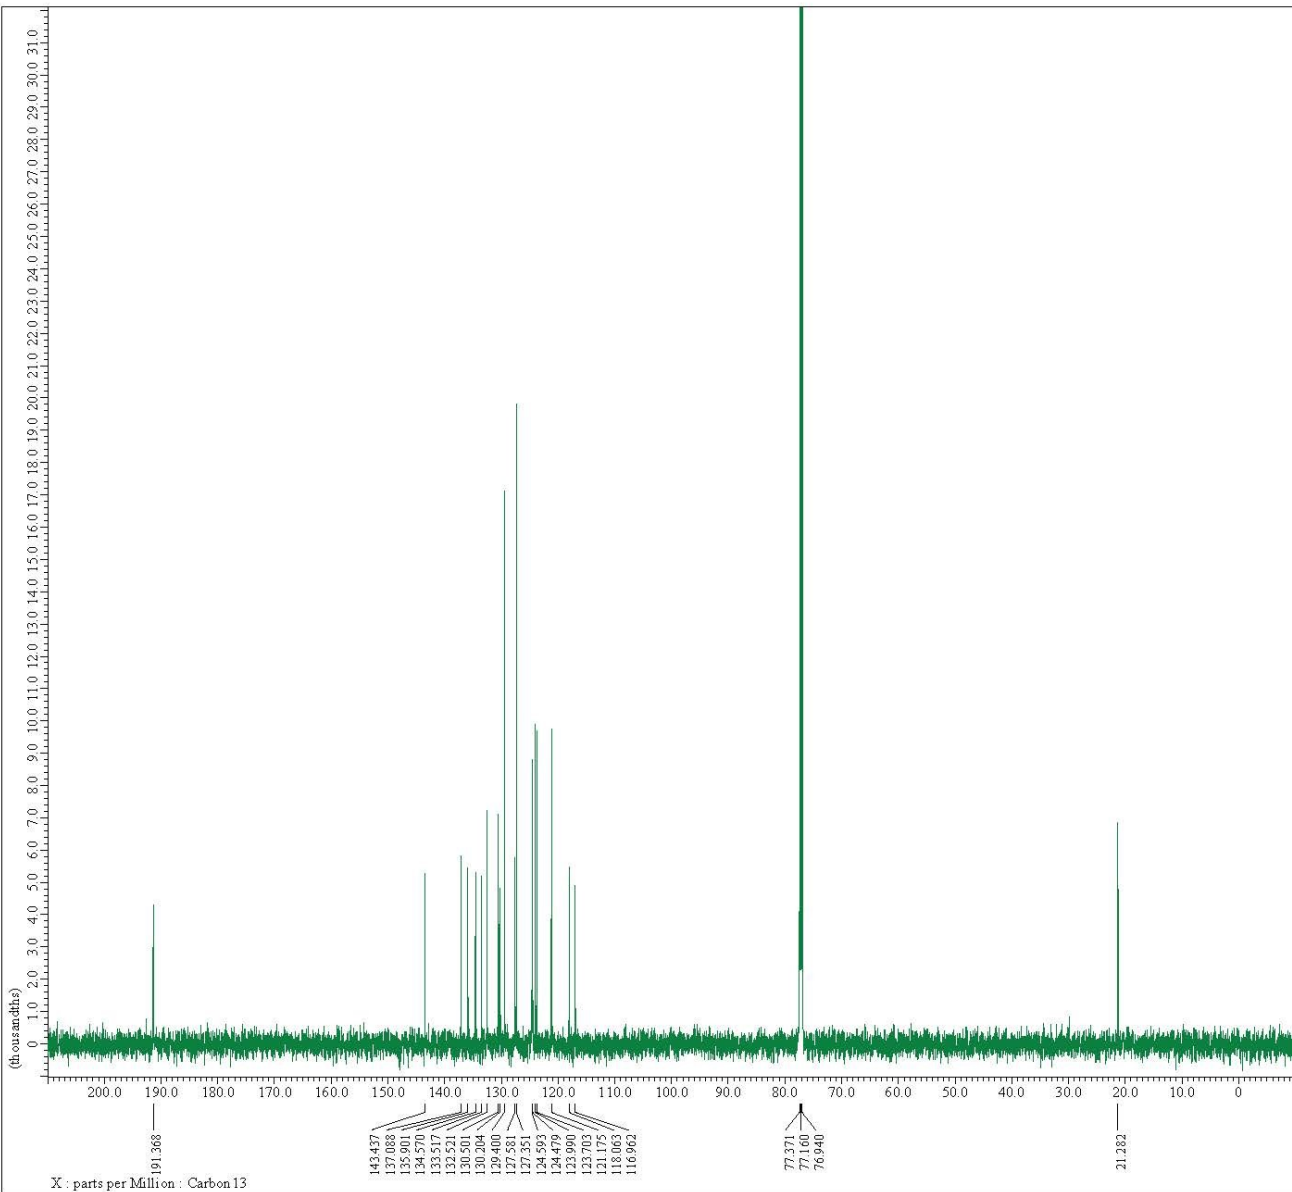

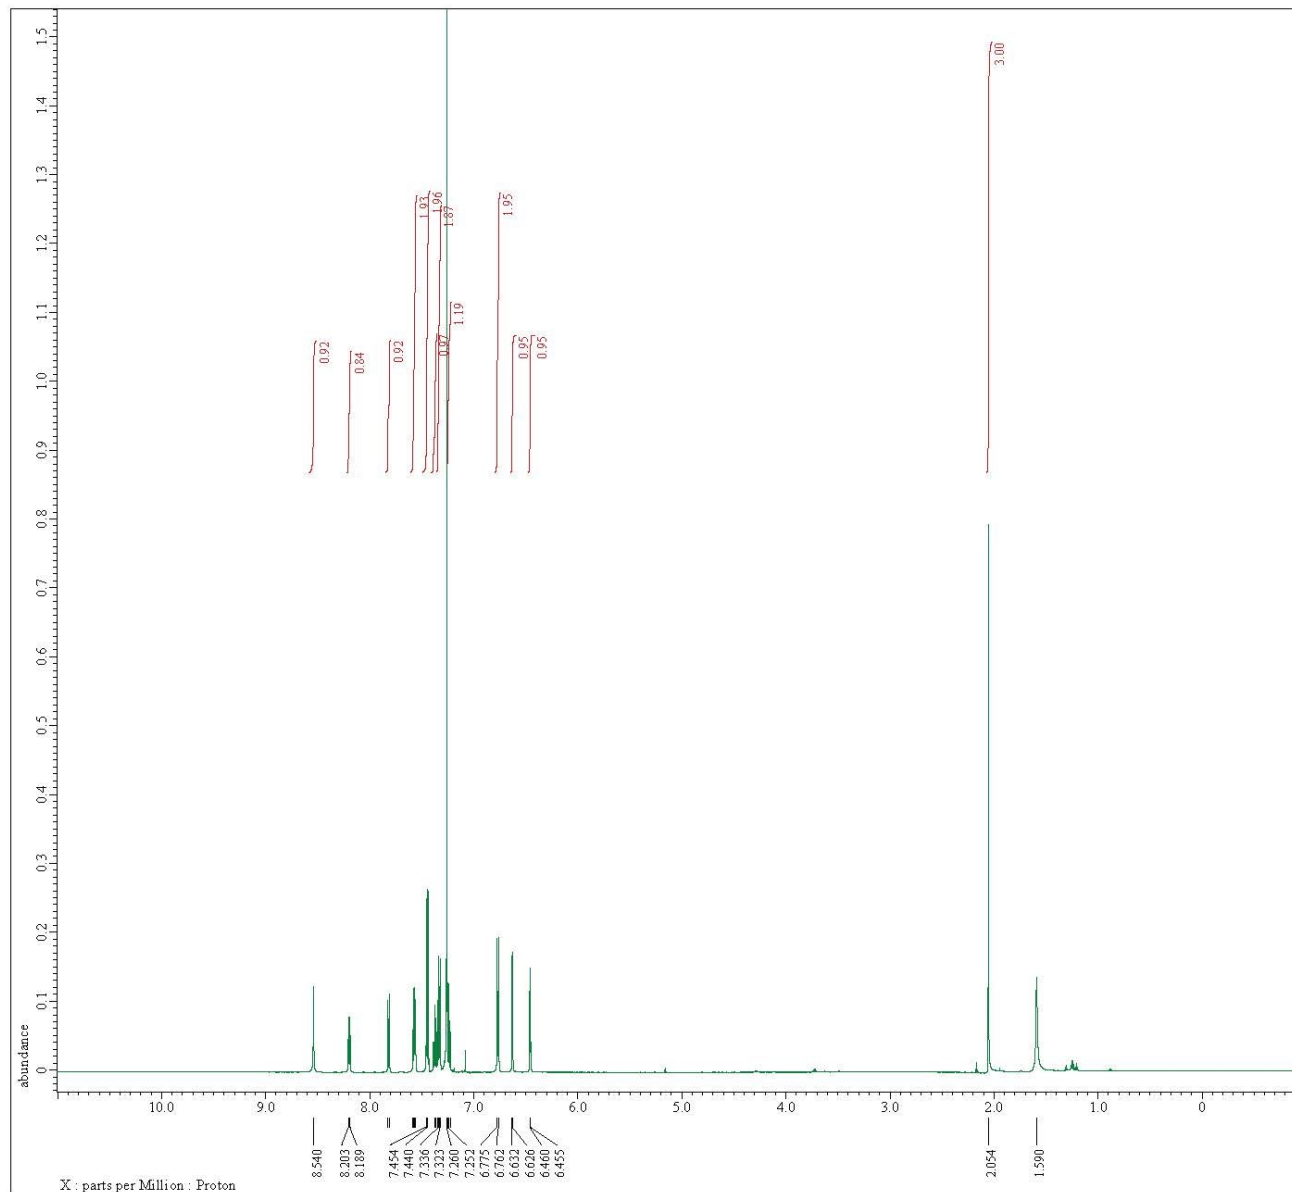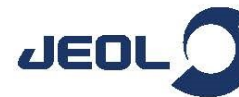

---- PROCESSING PARAMETERS ----  
 sexp( 0.2[Hz], 0.0[s] )  
 trapezoid( 0[Hz], 0[Hz], 80[Hz], 100[Hz] )  
 zerofill( 1, TRUE )  
 fft( 1, TRUE, TRUE )  
 machephase  
 ppm

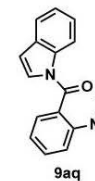

Filename = TW-6-126-5-4\_proton-1-3.jdf  
 Author = delta  
 Experiment = proton.jsp  
 Sample\_Id = TW-6-126-5-4  
 Solvent = CHLOROFORM-D  
 Actual\_Start\_Time = 23-JUN-2024 12:23:57  
 Revision\_Time = 24-JUN-2024 23:33:55

Data Format = 1D COMPLEX  
 Dia\_Size = 2824  
 X\_Domain = Proton  
 Dia\_Title = Proton  
 Dia\_Units = (ppm)  
 Dimensions = X  
 Spectrometer = JNM-ECZ600R/S3

Field\_Strength = 14.09636928[T] (600[MHz])  
 X\_Acq\_Duration = 2.18365952[s]  
 X\_Domain = Proton  
 X\_Freq = 600.1723046[MHz]  
 X\_Offset = 8[ppm]  
 X\_Points = 32768  
 X\_Prescans = 1  
 X\_Resolution = 0.45794605[Hz]  
 X\_Sweep = 15.0060024[kHz]  
 X\_Sweep\_Clippped = 12.00480192[kHz]  
 Itr\_Domain = Proton  
 Itr\_Freq = 600.1723046[MHz]  
 Itr\_Offset = 8[ppm]  
 Tri\_Domain = Proton  
 Tri\_Freq = 600.1723046[MHz]  
 Tri\_Offset = 8[ppm]  
 Blanking = 5.0[us]  
 Clipped = FALSE  
 Scans = 4  
 Total\_Scans = 4

Relaxation\_Delay = 2[s]  
 Recvr\_Gain = 36  
 Temp\_Get = 21.4[degC]  
 X\_90\_Width = 9.9[us]  
 X\_Acq\_Time = 2.18365952[s]  
 X\_Angle = 45[deg]  
 X\_Atn = 8.1[db]  
 X\_Pulse = 4.35[us]  
 Itr\_Mode = Off  
 Tri\_Mode = Off  
 Danta\_Loop = 200  
 Danta\_Preset = FALSE  
 Decimation\_Rate = 0  
 Initial\_Wait = 1[s]  
 Phase = (0, 90, 270, 180, 180, 270, 90, 0)  
 Preset\_Time = 2[s]  
 Preset\_Time\_Flag = FALSE  
 Relaxation\_Delay\_Calc = 0[s]  
 Relaxation\_Delay\_Temp = 2[s]  
 Repetition\_Time = 4.18365952[s]





---- PROCESSING PARAMETERS ----  
blip\_cld(15, 64, 1)  
sezp(2.0[Hz], 0.0[s])  
fit(1, TRUE, TRUE)  
machinephase  
ppm

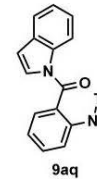

Filename = TK-6-126-5-4\_carbon-1-2.jdf  
Author = delta  
Experiment = carbon\_jsp  
Sample Id = TK-6-126-5-4  
Solvent = CHLOROFORM-D  
Actual\_Start\_Time = 23-JUN-2024 12:26:02  
Revision\_Time = 23-JUN-2024 13:26:05

Data Format = 1D COMPLEX  
Dim Size = 2624  
X\_Domain = Carbon13  
Dim Title = Carbon13  
Dim Units = (ppm)  
Dimensions = X  
Spectrometer = JNM-ECZ600R/S3

Field\_Strength = 14.05636928(T) (600[MHz])  
X\_Acq\_Duration = 0.69206016[s]  
X\_Domain = Carbon13  
X\_Freq = 150.91343039[MHz]  
X\_Offset = 100[ppm]  
X\_Points = 32768  
X\_Prescans = 1  
X\_Resolution = 1.44496109[Hz]  
X\_Sweep = 47.34848485[kHz]  
X\_Sweep\_Clippped = 37.87878788[kHz]  
Irr\_Domain = Proton  
Irr\_Freq = 600.1723046[MHz]  
Irr\_Offset = 5[ppm]  
Blanking = 15.0[us]  
Clipped = FALSE  
Scans = 512  
Total\_Scans = 512

Relaxation\_Delay = 1[s]  
Recvr\_Gain = 55  
Temp\_Cst = 21.6[degC]  
X\_90\_Width = 8.11[us]  
X\_Acq\_Time = 0.69206016[s]  
X\_Angle = 30[deg]  
X\_Atn = 11[dB]  
X\_Pulse = 2.7[us]  
Irr\_Atn\_Dec = 25.803[dB]  
Irr\_Atn\_Dec\_Calc = 25.803[dB]  
Irr\_Atn\_Dec\_Default\_Calc = 25.803[dB]  
Irr\_Atn\_Noise = 25.803[dB]  
Irr\_Dec\_Bandwidth\_Hz = 7.23684211[kHz]  
Irr\_Dec\_Bandwidth\_Ppm = 12.05784078[ppm]  
Irr\_Dec\_Freq = 600.1723046[MHz]  
Irr\_Dec\_Haric\_Factor = 2.2  
Irr\_Decoupling = TRUE  
Irr\_Noise = TRUE  
Irr\_Offset\_Default = 5[ppm]  
Irr\_Pwldch = 76[us]  
Irr\_Pwldch\_Default = 76[us]  
Irr\_Pwldch\_Default\_Calc = 76[us]  
Irr\_Pwldch\_Templ = 76[us]  
Irr\_Wurst = FALSE  
Decimation\_Rate = 0  
Initial\_Wait = 1[s]  
Noe\_Time = 1[s]  
Noe\_Time\_Flag = FALSE  
Relaxation\_Delay\_Calc = 0[s]  
Relaxation\_Delay\_Temp = 1[s]  
Repetition\_Time = 1.69206016[s]

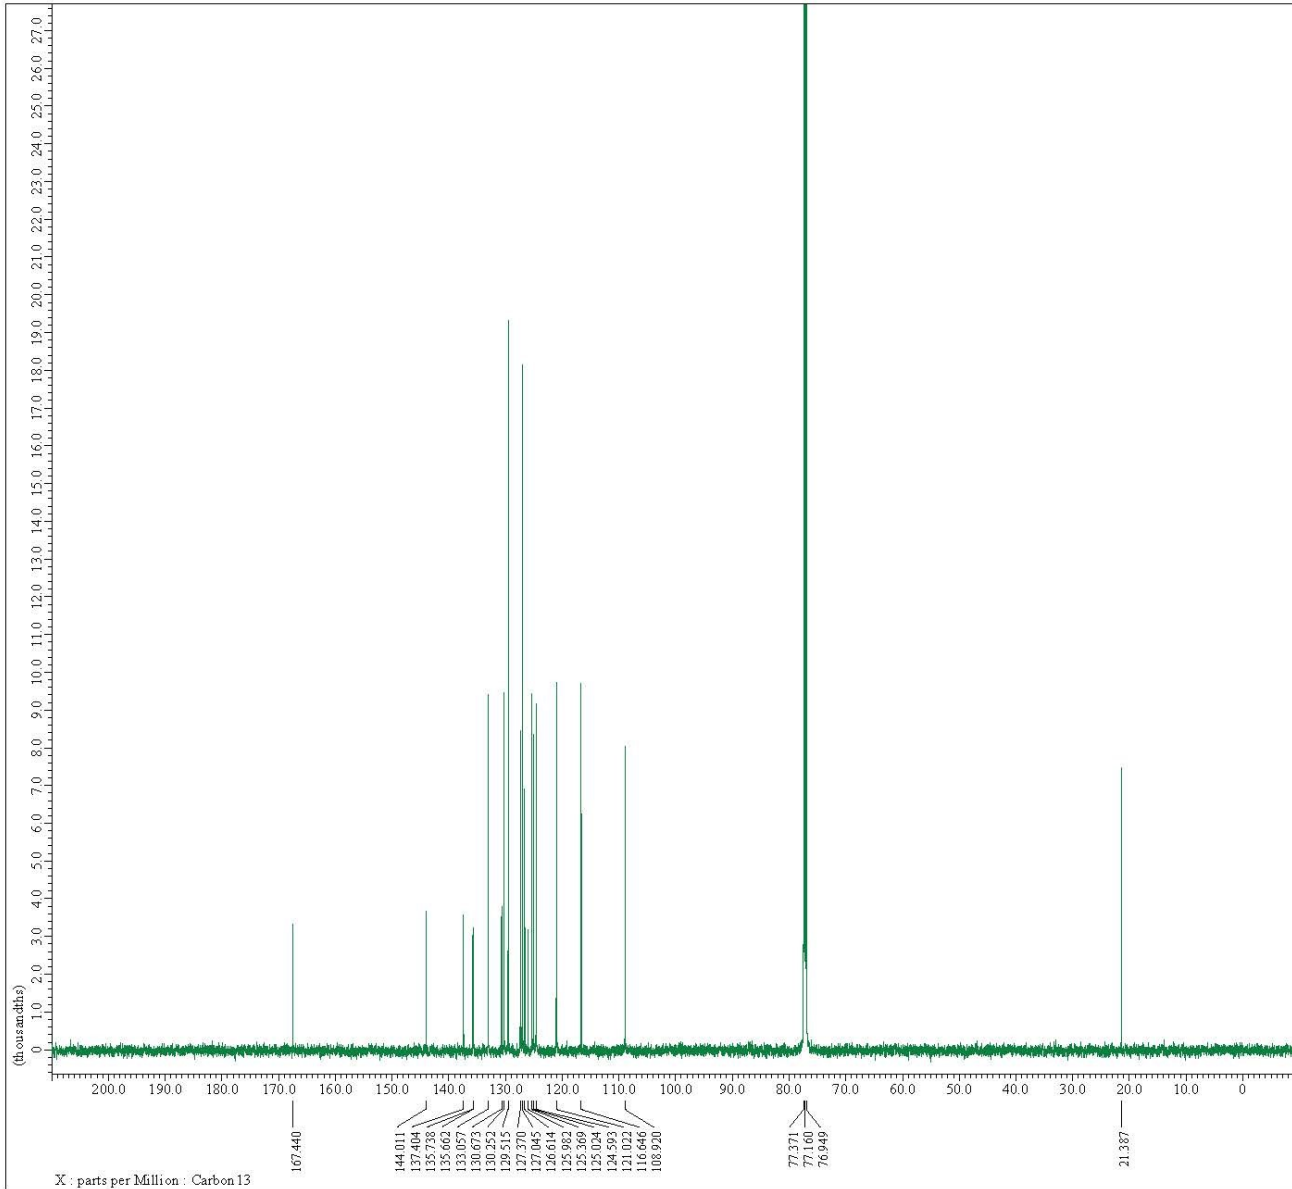



---- PROCESSING PARAMETERS ----  
sexp( 0.2[Hz], 0.0[s] )  
trapzoid( 0[Hz], 0[Hz], 80[Hz], 100[Hz] )  
zerofill( 1, TRUE )  
fit( 1, TRUE, TRUE )  
machanephase  
ppm

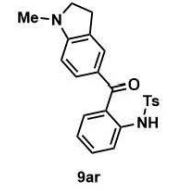

Filename = TW-6-192-1\_proton-2-3.jdf  
Author = delta  
Experiment = proton.jsp  
Sample Id = TW-6-192-1  
Solvent = CHLOROFORM-D  
Actual\_Start\_Time = 11-JUN-2024 22:28:36  
Revision\_Time = 9-JUL-2024 13:17:37

Data Format = 1D COMPLEX  
Da Size = 26214  
X\_Domain = Proton  
Da Title = Proton  
Da Units = (ppm)  
Dimensions = X  
Spectrometer = JNM-ECZ600R/S3

Field Strength = 14.09636928[T] (600[MHz])  
X\_Acq\_Duration = 2.18365952[s]  
X\_Domain = Proton  
X\_Freq = 600.1723046[MHz]  
X\_Offset = 8[ppm]  
X\_Points = 32768  
X\_Prescans = 1  
X\_Resolution = 0.45794605[Hz]  
X\_Sweep = 15.0060024[kHz]  
X\_Sweep\_Clippped = 12.00480192[kHz]  
Irr\_Domain = Proton  
Irr\_Freq = 600.1723046[MHz]  
Irr\_Offset = 8[ppm]  
Tri\_Domain = Proton  
Tri\_Freq = 600.1723046[MHz]  
Tri\_Offset = 8[ppm]  
Blanking = 5.0[us]  
Clipped = FALSE  
Scans = 4  
Total\_Scans = 4

Relaxation\_Delay = 2[s]  
Recvr\_Gain = 36  
Temp\_Get = 21.8[degC]  
X\_90\_Width = 9.9[us]  
X\_Acq\_Time = 2.18365952[s]  
X\_Angle = 45[deg]  
X\_Atn = 8.1[db]  
X\_Pulse = 4.35[us]  
Irr\_Mode = Off  
Tri\_Mode = Off  
Data\_Loop = 200  
Data\_Preset = FALSE  
Decimation\_Rate = 0  
Initial\_Wait = 1[s]  
Phase = (0, 90, 270, 180, 180, 270, 90, 0)  
Preset\_Time = 2[s]  
Preset\_Time\_Flag = FALSE  
Relaxation\_Delay\_Calc = 0[s]  
Relaxation\_Delay\_Temp = 2[s]  
Repetition\_Time = 4.18365952[s]

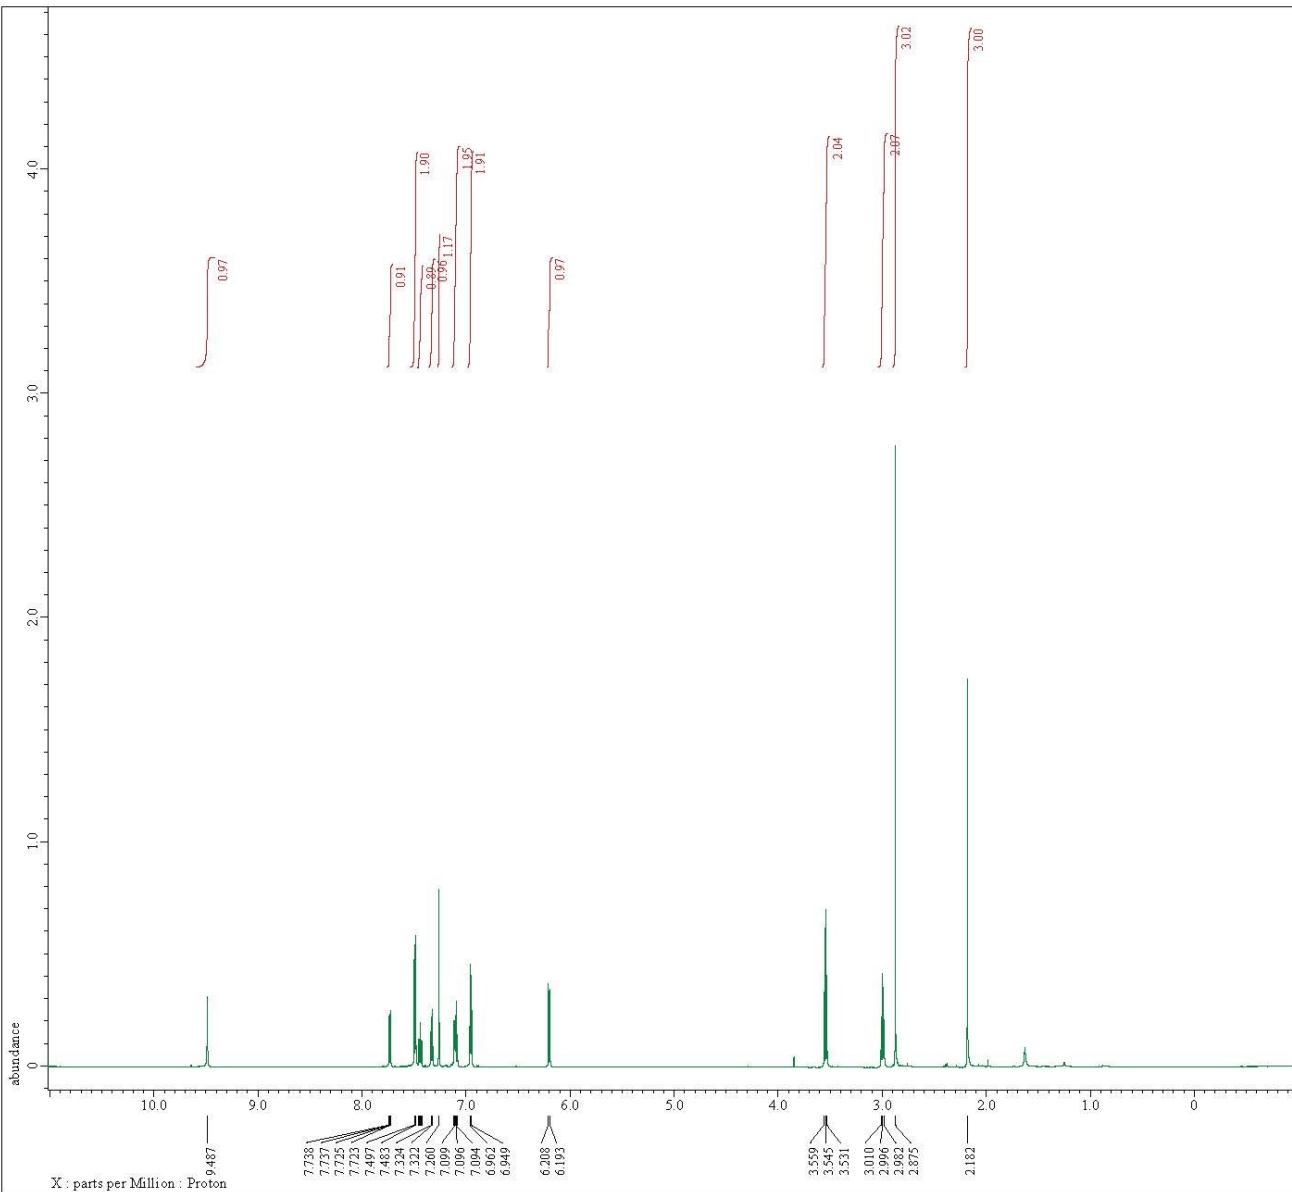



---- PROCESSING PARAMETERS ----  
blip\_cld(15, 64, 1)  
sezp( 2.0[Hz], 0.0[s] )  
fit( 1, TRUE, TRUE )  
machinephase  
ppm

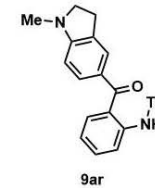

Filename = TK-6-132-1\_carbon-1-2.jdf  
Author = delta  
Experiment = carbon\_1.jp  
Sample Id = TK-6-132-1  
Solvent = CHLOROFORM-D  
Actual\_Start\_Time = 11-JUN-2024 22:47:54  
Revision\_Time = 11-JUN-2024 22:51:35  
Comment = NPPH3  
Data\_Format = 1D COMPLEX  
Dim\_Size = 26214  
X\_Domain = Carbon13  
Dim\_Title = Carbon13  
Dim\_Units = [ppm]  
Dimensions = X  
Spectrometer = JNM-EC2600R/S3  
Field\_Strength = 14.09636328 [T] (600 [MHz])  
X\_Acq\_Duration = 0.69206016 [s]  
X\_Domain = Carbon13  
X\_Freq = 150.91343039 [MHz]  
X\_Offset = 100 [ppm]  
X\_Points = 32768  
X\_Prescans = 1  
X\_Resolution = 1.44496109 [Hz]  
X\_Sweep = 47.34848488 [kHz]  
X\_Sweep\_Clipped = 37.87978788 [kHz]  
Irr\_Domain = Proton  
Irr\_Freq = 600.1723046 [MHz]  
Irr\_Offset = 5 [ppm]  
Blanking = 15.0 [us]  
Clipped = FALSE  
Scans = 128  
Total\_Scans = 128  
Relaxation\_Delay = 2 [s]  
Recvr\_Gain = 56  
Temp\_Dec = 21.1 [dC]  
X\_90\_Width = 9.11 [us]  
X\_Acq\_Time = 0.69206016 [s]  
X\_Angle = 30 [deg]  
X\_Ara = 11 [dB]  
X\_Pulse = 2.7 [us]  
Irr\_Atn\_Dec = 25.803 [dB]  
Irr\_Atn\_Dec\_Calc = 25.803 [dB]  
Irr\_Atn\_Dec\_Default\_Calc = 25.803 [dB]  
Irr\_Atn\_Noise = 25.803 [dB]  
Irr\_Dec\_Bandwidth\_Hz = 7.28894211 [kHz]  
Irr\_Dec\_Bandwidth\_Ppm = 12.05794078 [ppm]  
Irr\_Dec\_Freq = 600.1723046 [MHz]  
Irr\_Dec\_Merit\_Factor = 2.2  
Irr\_Decoupling = TRUE  
Irr\_Noise = TRUE  
Irr\_Noise = WALTZ  
Irr\_Offset\_Default = 5 [ppm]  
Irr\_Width = 96 [us]  
Irr\_Width\_Default = 76 [us]  
Irr\_Width\_Default\_Calc = 76 [us]  
Irr\_Width\_Templ = 96 [us]  
Irr\_Wurst = FALSE  
Decimation\_Rate = 0  
Initial\_Wait = 1 [s]  
Noe\_Time = 2 [s]  
Noe\_Time\_Flag = FALSE  
Relaxation\_Delay\_Calc = 0 [s]  
Relaxation\_Delay\_Temp = 2 [s]  
Repetition\_Time = 2.69206016 [s]

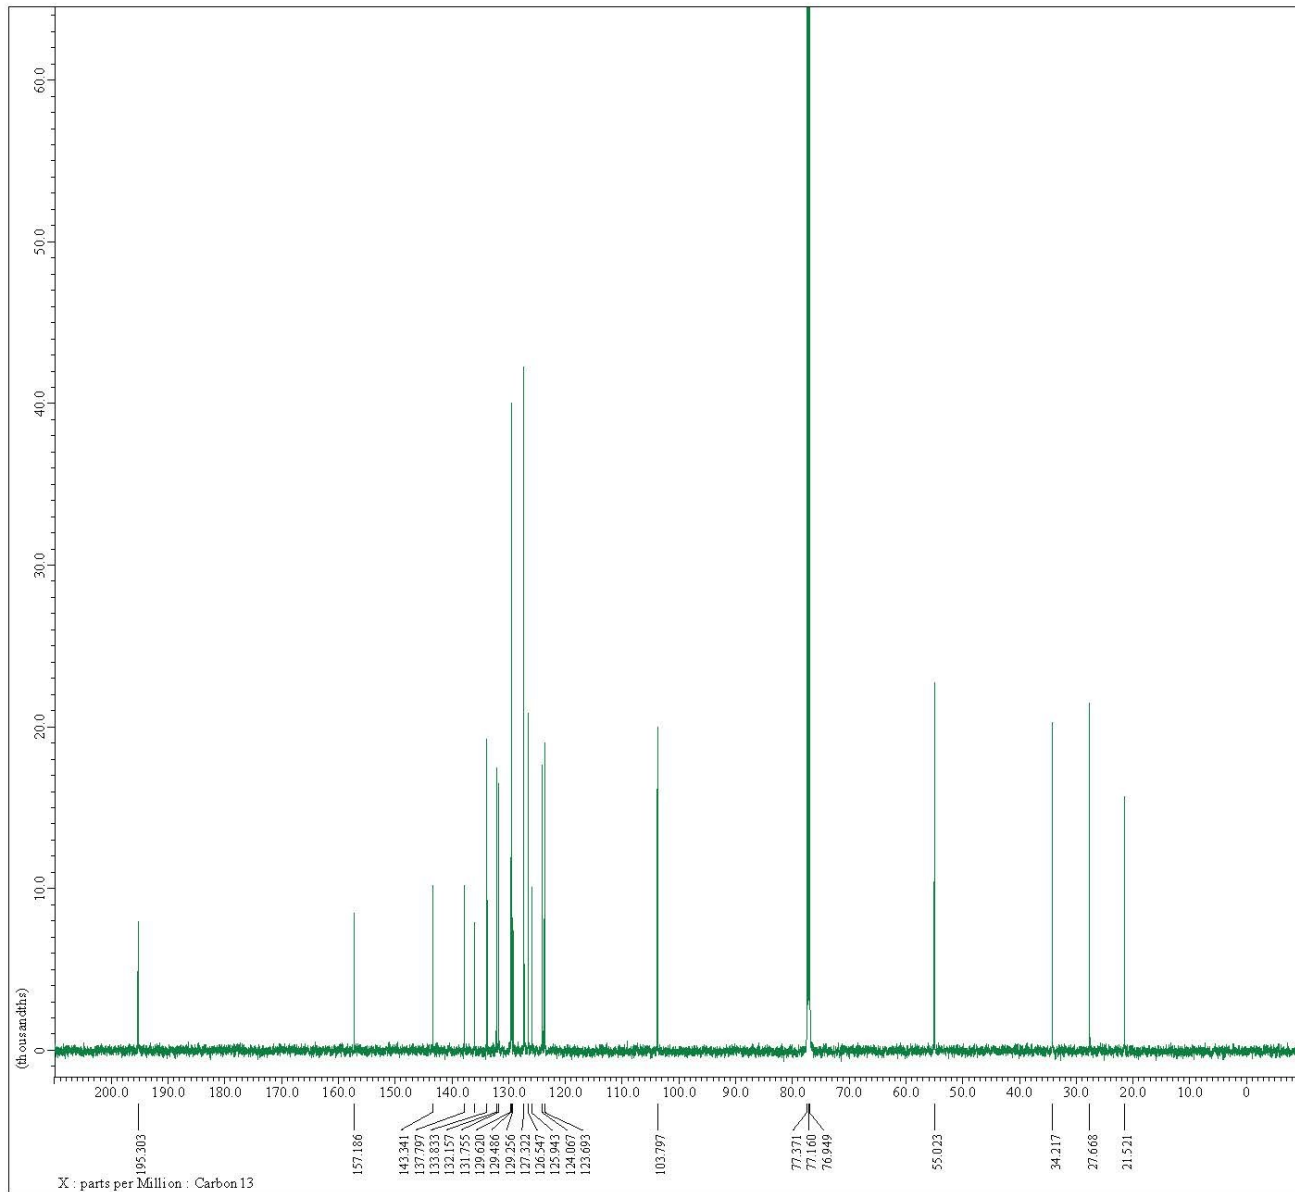

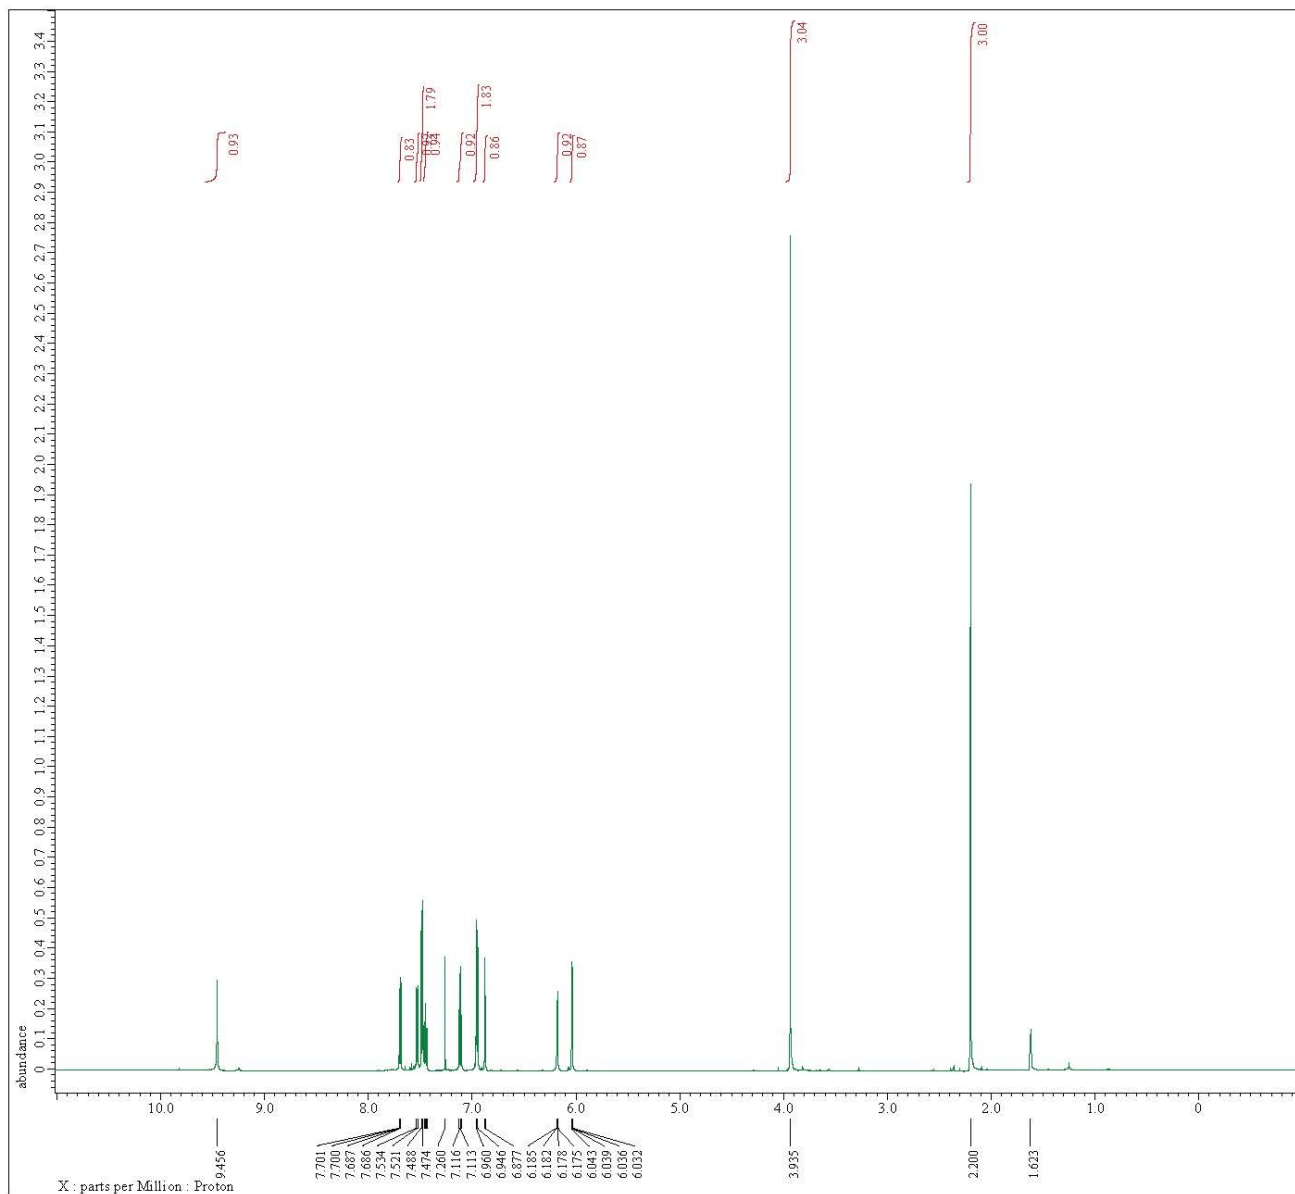

---- PROCESSING PARAMETERS ----  
 sexp( 0.2[Hz], 0.0[s] )  
 trapezoid( 0[Hz], 0[Hz], 80[Hz], 100[Hz] )  
 zerofill( 1, TRUE )  
 fft( 1, TRUE, TRUE )  
 machinephase  
 ppa

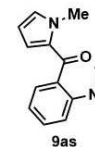

Filename = TW-6-136-1-2\_proton-1-3.jdf  
 Author = delta  
 Experiment = proton.jxp  
 Sample\_id = TW-6-136-1-2  
 Solvent = CHLOROFORM-D  
 Actual\_Start\_Time = 21-JUN-2024 22:54:58  
 Version\_Time = 24-JUN-2024 22:44:19

Data Format = 1D COMPLEX  
 Data Size = 26214  
 X\_Domain = Proton  
 Y\_Domain = Proton  
 Data Units = (ppm)  
 Dimensions = X  
 Spectrometer = JNM-EZ600R/S3

Field Strength = 14.09636928[T] (600[MHz])  
 X\_AcqDuration = 2.18365952[s]  
 X\_Domain = Proton  
 X\_Freq = 600.1723046[MHz]  
 X\_Offset = 5[ppm]  
 X\_Points = 32768  
 X\_Prescans = 1  
 X\_Resolution = 0.45794695[Hz]  
 X\_Sweep = 15.0060024[KHz]  
 X\_Sweep\_Clippped = 12.00480192[KHz]  
 Irf\_Domain = Proton  
 Irf\_Freq = 600.1723046[MHz]  
 Irf\_Offset = 5[ppm]  
 Tri\_Domain = Proton  
 Tri\_Freq = 600.1723046[MHz]  
 Tri\_Offset = 5[ppm]  
 Blanking = 5.0[us]  
 Clipped = FALSE  
 Scans = 8  
 Total\_Scans = 8

Relaxation\_Delay = 2[s]  
 Recvr Gain = 36  
 Temp\_Det = 21.9[degC]  
 X\_90Width = 9.9[us]  
 X\_Acq Time = 2.18365952[s]  
 X\_Angle = 45[deg]  
 X\_Atn = 8.1[dB]  
 X\_Pulse = 4.95[us]  
 Irf\_Mode = Off  
 Tri\_Mode = Off  
 Dante\_Loop = 200  
 Dante\_Preset = FALSE  
 Decimation\_Rate = 0  
 Initial\_Wait = 1[s]  
 Phase = (0, 90, 270, 180, 180, 270, 90, 0)  
 Preset\_Time = 2[s]  
 Preset\_Time\_Play = FALSE  
 Relaxation\_Delay\_Calc = 0[s]  
 Relaxation\_Delay\_Temp = 2[s]  
 Repetition\_Time = 4.18365952[s]



---- PROCESSING PARAMETERS ----  
blip\_cld(15, 64, 1)  
sezp( 2.0[Hz], 0.0[s] )  
ft( 1, TRUE, TRUE )  
machinephase  
ppm

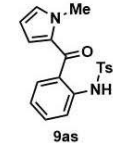

Filename = TK-6-136-1-2\_carbon-1-3.jdf  
Author = delta  
Experiment = carbon\_jsp  
Sample Id = TK-6-136-1-2  
Solvent = CHLOROFORM-D  
Actual\_Start\_Time = 21-JUN-2024 22:54:24  
Revision\_Time = 24-JUN-2024 23:46:21

Data Format = 1D COMPLEX  
Dim Size = 2624  
X\_Domain = Carbon13  
Dim Title = Carbon13  
Dim Units = (ppm)  
Dimensions = X  
Spectrometer = JNM-ECZ600R/S3

Field\_Strength = 14.05636928[T] (600[MHz])  
X\_Acq\_Duration = 0.69206016[s]  
X\_Domain = Carbon13  
X\_Freq = 150.91343039[MHz]  
X\_Offset = 100[ppm]  
X\_Points = 32768  
X\_Prescans = 1  
X\_Resolution = 1.44496109[Hz]  
X\_Sweep = 47.34848485[kHz]  
X\_Sweep\_Clippped = 37.87878788[kHz]  
Irr\_Domain = Proton  
Irr\_Freq = 600.1723046[MHz]  
Irr\_Offset = 5[ppm]  
Blanking = 15.0[us]  
Clipped = FALSE  
Scans = 130  
Total\_Scans = 130

Relaxation\_Delay = 1[s]  
Recvr\_Gain = 55  
Temp\_Cst = 21.8[dC]  
X\_90\_Width = 8.11[us]  
X\_Acq\_Time = 0.69206016[s]  
X\_Angle = 30[deg]  
X\_Atn = 11[dB]  
X\_Pulse = 2.7[us]  
Irr\_Atn\_Dec = 25.803[dB]  
Irr\_Atn\_Dec\_Calc = 25.803[dB]  
Irr\_Atn\_Dec\_Default\_Calc = 25.803[dB]  
Irr\_Atn\_Noise = 25.803[dB]  
Irr\_Dec\_Bandwidth\_Hz = 7.23684211[kHz]  
Irr\_Dec\_Bandwidth\_Ppm = 12.05784078[ppm]  
Irr\_Dec\_Freq = 600.1723046[MHz]  
Irr\_Dec\_Haric\_Factor = 2.2  
Irr\_Decoupling = TRUE  
Irr\_Noise = TRUE  
Irr\_Noise = WAIT  
Irr\_Offset\_Default = 5[ppm]  
Irr\_Pwldch = 76[us]  
Irr\_Pwldch\_Default = 76[us]  
Irr\_Pwldch\_Default\_Calc = 76[us]  
Irr\_Pwldch\_Templ = 76[us]  
Irr\_Thurst = FALSE  
Declination\_Rate = 0  
Initial\_Wait = 1[s]  
Noe\_Time = 1[s]  
Noe\_Time\_Flag = FALSE  
Relaxation\_Delay\_Calc = 0[s]  
Relaxation\_Delay\_Temp = 1[s]  
Repetition\_Time = 1.69206016[s]

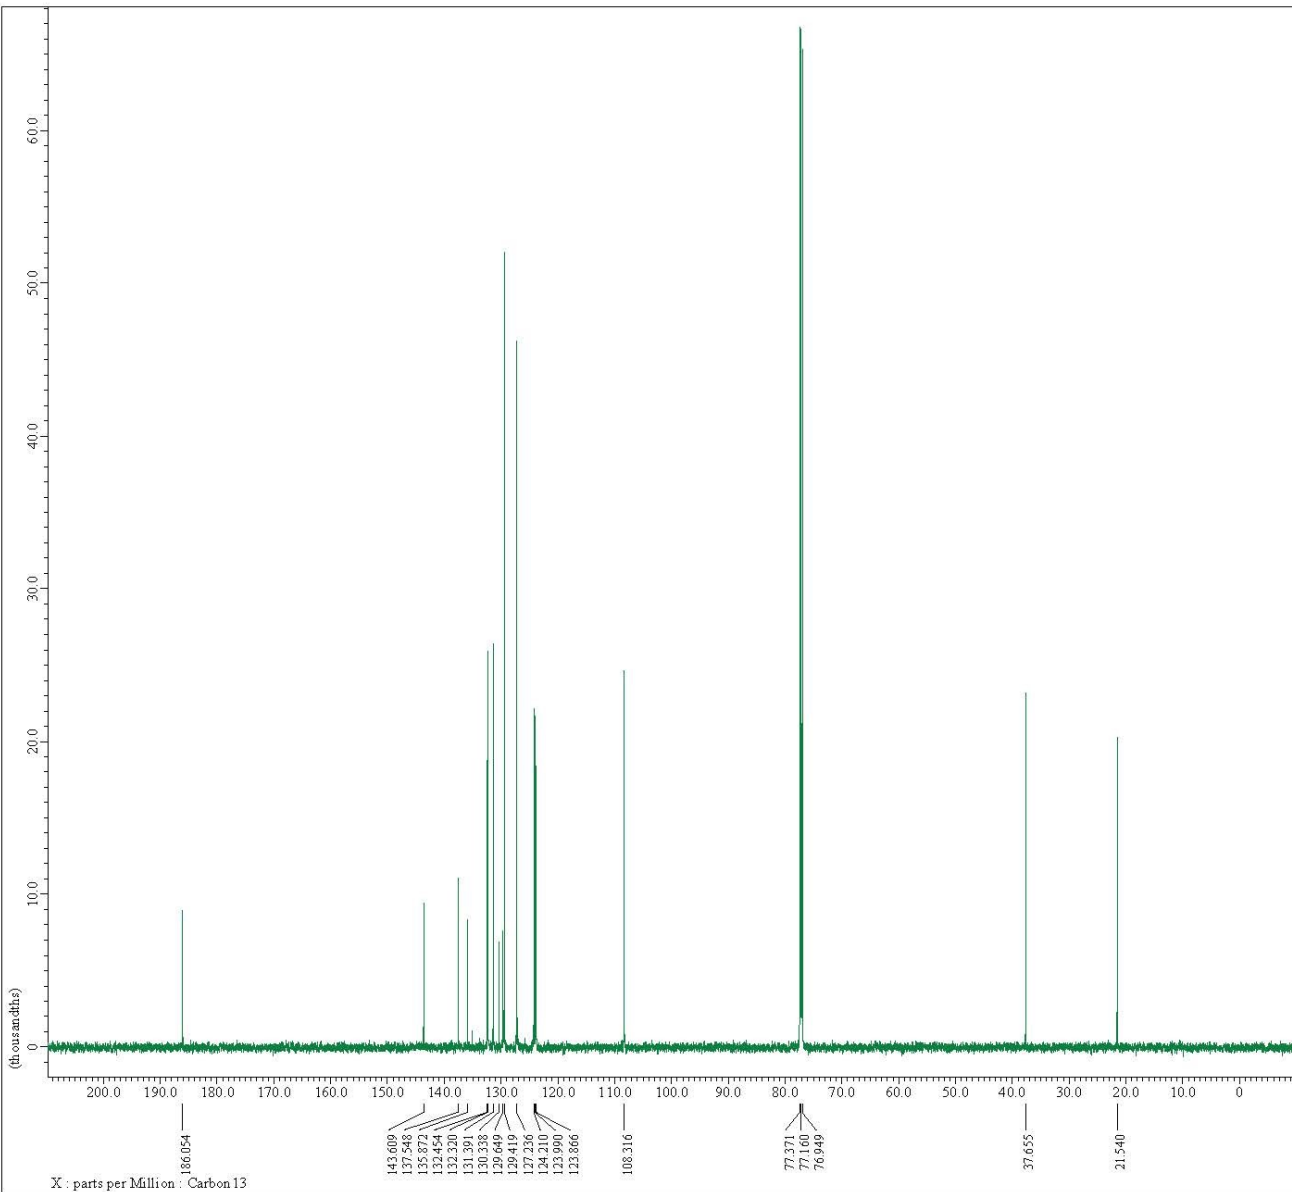



---- PROCESSING PARAMETERS ----  
sexp( 0.2[Hz], 0.0[s] )  
trapezoid( 0[Hz], 0[Hz], 80[Hz], 100[Hz] )  
zerofill( 1, TRUE )  
fft( 1, TRUE, TRUE )  
machinphase  
ppa  
reference( 7.24864[ppm], 7.26[ppm] )  
thresh( 3.47868[Hz], 1, )  
以下由名: KY-1-058-7 proton-2-1.jdf

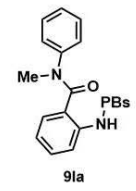

Filename = KY-1-058-7\_proton-2-2.jdf  
Author = delta  
Experiment = proton.jxp  
Sample\_id = KY-1-058-7  
Solvent = CHLOROFORM-D  
Actual\_Start\_Time = 20-JUN-2024 22:42:37  
Version\_Time = 21-JUN-2024 08:01:03  
Data\_Format = 1D\_COMPLEX  
Data\_Size = 26214  
X\_Domain = Proton  
Data\_Title = Proton  
Data\_Units = (ppm)  
Dimensions = X  
Spectrometer = JNM-ECZ600R/S3  
Field\_Strength = 14.0963628(T) (600(MHz))  
X\_Acq\_Duration = 2.18365952(s)  
X\_Domain = Proton  
X\_Freq = 600.1723046(MHz)  
X\_Offset = 5[ppm]  
X\_Points = 32768  
X\_Prescans = 1  
X\_Resolution = 0.45794695(Hz)  
X\_Sweep = 15.0060024(KHz)  
X\_Sweep\_Clippped = 12.00480192(KHz)  
Irr\_Domain = Proton  
Irr\_Freq = 600.1723046(MHz)  
Irr\_Offset = 5[ppm]  
Tri\_Domain = Proton  
Tri\_Freq = 600.1723046(MHz)  
Tri\_Offset = 5[ppm]  
Blanking = 5.0[us]  
Clipped = FALSE  
Scans = 4  
Total\_Scans = 4  
Relaxation\_Delay = 2[s]  
Recvr\_Gain = 46  
Temp\_Set = 21.1[degC]  
X\_90\_Pulse = 9.9[us]  
X\_Acq\_Time = 2.18365952[s]  
X\_Angle = 45[deg]  
X\_Atn = 8.1[dB]  
X\_Pulse = 4.95[us]  
Irr\_Mode = Off  
Tri\_Mode = Off  
Dante\_Loop = 200  
Dante\_Preset = FALSE  
Decimation\_Rate = 0  
Initial\_Wait = 1[s]  
Phase = (0, 90, 270, 180, 180, 270, 90, 0)  
Preset\_Time = 2[s]  
Preset\_Time\_Play = FALSE  
Relaxation\_Delay\_Calc = 0[s]  
Relaxation\_Delay\_Temp = 2[s]  
Repetition\_Time = 4.18365952[s]

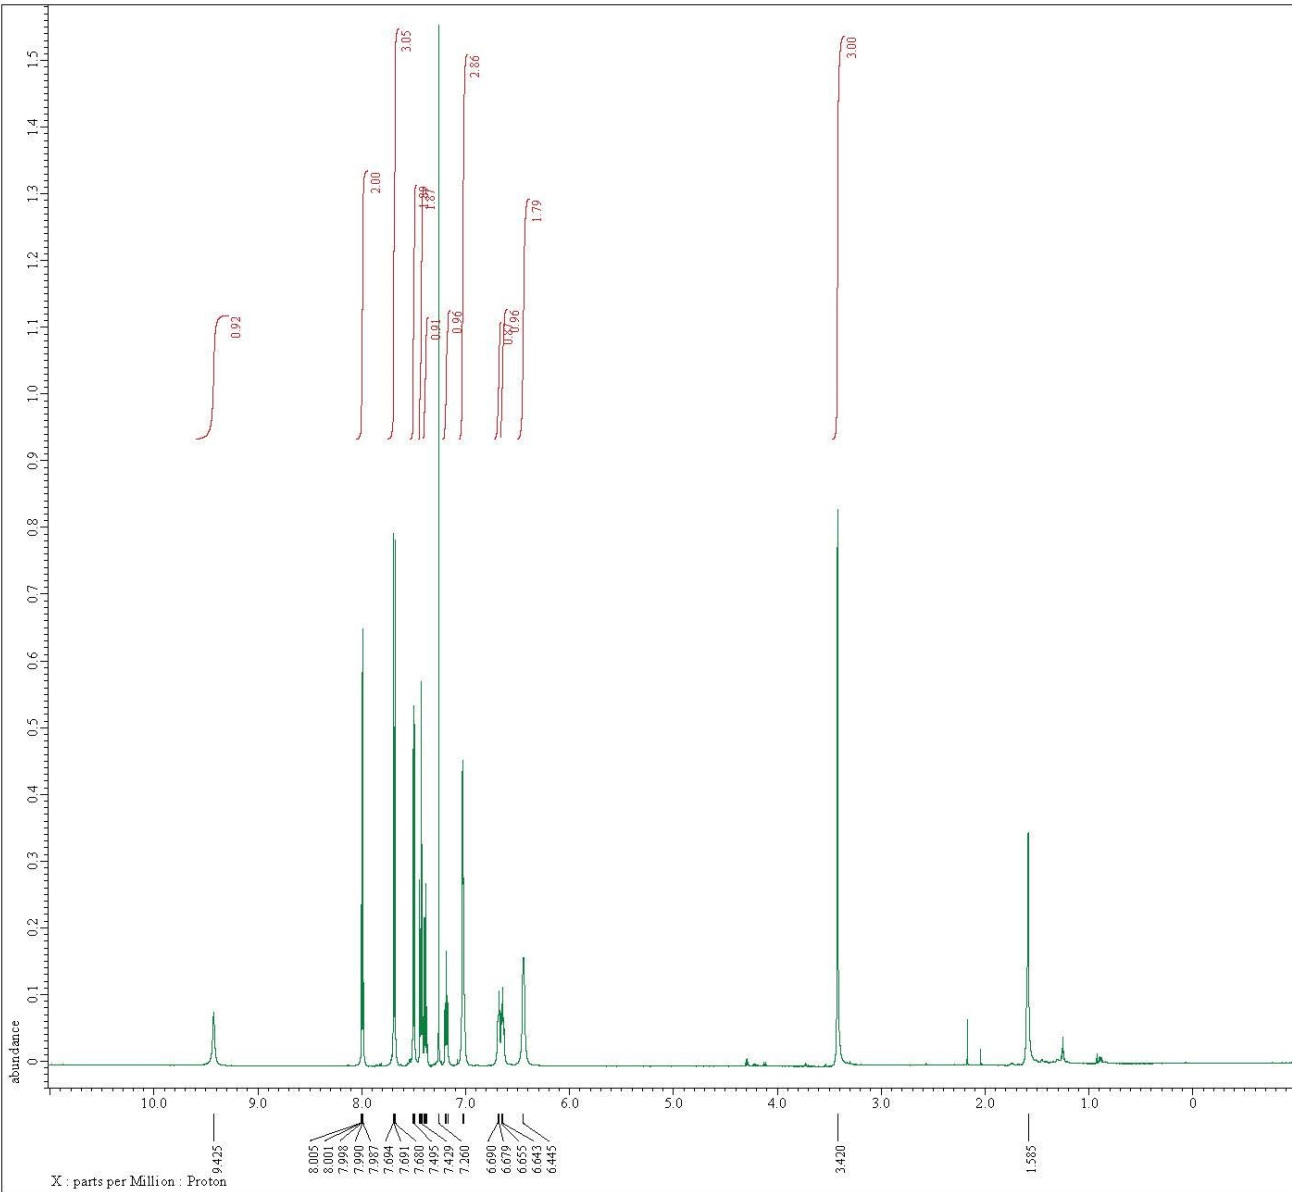



---- PROCESSING PARAMETERS ----  
blip\_cld(15, 64, 1)  
sezp(2.0[Hz], 0.0[s])  
fit(1, TRUE, TRUE)  
machinephase  
ppm

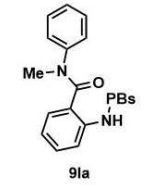

Filename = KY-1-058-7\_carbon-1-2.jdf  
Author = delta  
Experiment = carbon.jsp  
Sample Id = KY-1-058-7  
Solvent = CHLOROFORM-D  
Actual\_Start\_Time = 19-JUN-2024 22:25:13  
Revision\_Time = 19-JUN-2024 22:28:18

Data Format = 1D COMPLEX  
Dir\_Size = 2624  
X\_Domain = Carbon13  
Dir\_Title = Carbon13  
Dir\_Units = (ppm)  
Dimensions = X  
Spectrometer = JNM-ECZ600R/S3

Field\_Strength = 14.05636928(T) (600[MHz])  
X\_Acq\_Duration = 0.63206016[s]  
X\_Domain = Carbon13  
X\_Freq = 150.91343039[MHz]  
X\_Offset = 100[ppm]  
X\_Points = 32768  
X\_Prescans = 1  
X\_Resolution = 1.44496109[Hz]  
X\_Sweep = 47.34848485[kHz]  
X\_Sweep\_Clippped = 37.87878788[kHz]  
Irr\_Domain = Proton  
Irr\_Freq = 600.1723046[MHz]  
Irr\_Offset = 5[ppm]  
Blanking = 15.0[us]  
Clipped = FALSE  
Scans = 130  
Total\_Scans = 130

Relaxation\_Delay = 1.5[s]  
Recvr\_Gain = 55  
Temp\_Cst = 55[dC]  
X\_90\_Width = 8.1[us]  
X\_Acq\_Time = 0.63206016[s]  
X\_Angle = 30[deg]  
X\_Atn = 11[dB]  
X\_Pulse = 2.7[us]  
Irr\_Atn\_Dec = 25.803[dB]  
Irr\_Atn\_Dec\_Calc = 25.803[dB]  
Irr\_Atn\_Dec\_Default\_Calc = 25.803[dB]  
Irr\_Atn\_Noise = 25.803[dB]  
Irr\_Dec\_Bandwidth\_Hz = 7.23684211[kHz]  
Irr\_Dec\_Bandwidth\_Ppm = 12.05784078[ppm]  
Irr\_Dec\_Freq = 600.1723046[MHz]  
Irr\_Dec\_Haric\_Factor = 2.2  
Irr\_Decoupling = TRUE  
Irr\_Noise = TRUE  
Irr\_Offset\_Default = 5[ppm]  
Irr\_Pwldch = 76[us]  
Irr\_Pwldch\_Default = 76[us]  
Irr\_Pwldch\_Default\_Calc = 76[us]  
Irr\_Pwldch\_Templ = 76[us]  
Irr\_Thurst = FALSE  
Declination\_Rate = 0  
Initial\_Wait = 1[s]  
Noe\_Time = 1.5[s]  
Noe\_Time\_Flag = FALSE  
Relaxation\_Delay\_Calc = 0[s]  
Relaxation\_Delay\_Temp = 1.5[s]  
Repetition\_Time = 2.19206016[s]

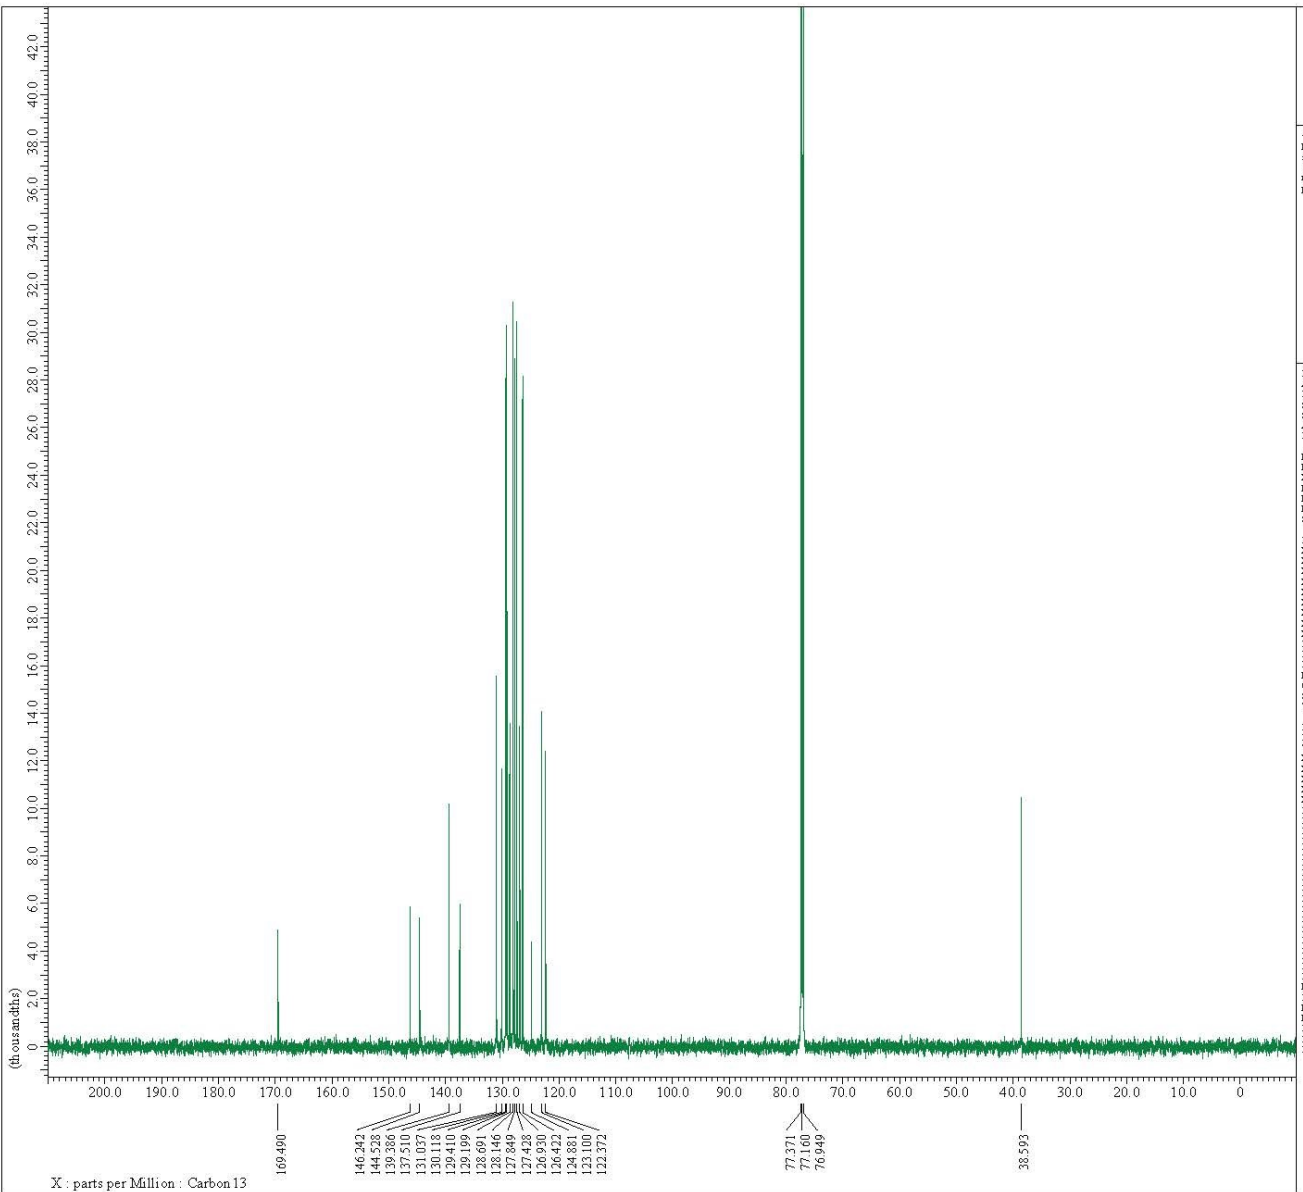

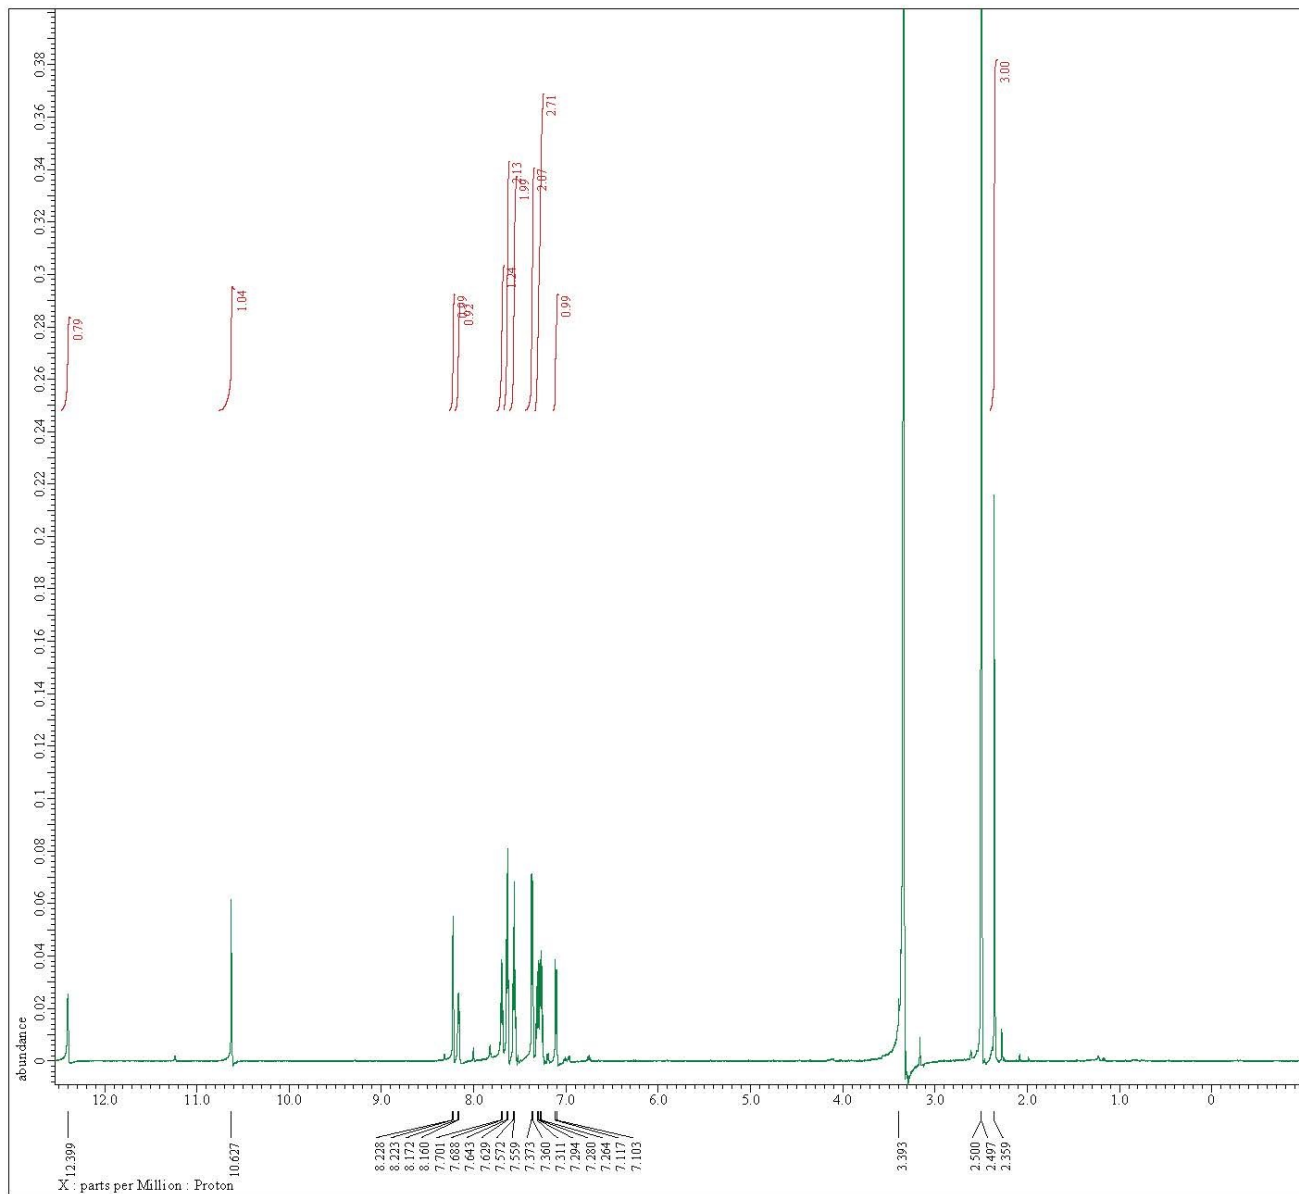





**11ai**

```

---- PROCESSING PARAMETERS ----
sexp( 0.2[MHz], 0.0[s] )
trapzoid( 0[Hz], 0[Hz], 80[Hz], 100[Hz] )
zerofill( 1, TRUE )
fft( 1, TRUE, TRUE )
machephase
ppm
base_correct( Akima, 5, 0, FALSE, 3, None, FALSE )

Filename      = TR-6-094-1_proton-2-3.jdf
Author        = delta
Experiment    = proton.jsp
Sample_Id     = TR-6-094-1
Solvent       = DMSO-d6
Actual_Start_Time = 26-JUN-2024 22:47:55
Revision_Time  = 27-JUN-2024 23:45:18

Data Format    = 1D REAL
Daq_Size      = 26214
X_Domain      = Proton
Daq_Title     = Proton
Daq_Units     = (ppm)
Dimensions    = X
Spectrometer  = JNM-ECZ600R/S3

Field_Strength = 14.09636928[T] (600[MHz])
X_AcqDuration  = 2.91110912[s]
X_Domain       = Proton
X_Freq         = 600.1723046[MHz]
X_Offset       = 5[ppm]
X_Points       = 32768
X_Prescans     = 1
X_Resolution   = 0.34351169[Hz]
X_Sweep        = 11.2561909[kHz]
X_Sweep_Clippped = 9.00495272[kHz]
IR_Domain     = Proton
IR_Freq       = 600.1723046[MHz]
IR_Offset     = 5[ppm]
Tri_Domain    = Proton
Tri_Freq      = 600.1723046[MHz]
Tri_Offset    = 5[ppm]
Blanking      = 5.0[us]
Clipped       = FALSE
Scans         = 4
Total_Scans   = 4

Relaxation_Delay = 2[s]
Recvr_Gain       = 46
Temp_Get        = 21[degC]
X_90_Width      = 9.9[us]
X_Acq_Time      = 2.91110912[s]
X_Angle         = 45[deg]
X_Att          = 8.1[dB]
X_Pulse        = 4.35[us]
IR_Mode         = Off
Tri_Mode        = Off
Danta_Loop     = 200
Danta_Preset   = FALSE
Decimation_Rate = 0
Initial_Wait    = 1[s]
Phase          = (0, 90, 270, 180, 180, 270, 90, 0)
Preset_Time    = 2[s]
Preset_Time_Flag = FALSE
Relaxation_Delay_Calc = 0[s]
Relaxation_Delay_Temp = 2[s]
Repetition_Time = 4.91110912[s]

```





---- PROCESSING PARAMETERS ----  
blip\_cld(15, 64, 1)  
sezp(2.0[Hz], 0.0[s])  
fit(1, TRUE, TRUE)  
machinephase  
ppm

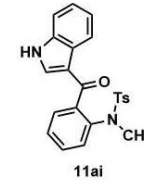

Filename = JK-6-084-1-5\_carbon-1-2.jdf  
Author = delta  
Experiment = carbon\_jsp  
Sample Id = JK-6-084-1-5  
Solvent = DMSO-D6  
Actual\_Start\_Time = 27-JUN-2024 21:58:13  
Revision\_Time = 27-JUN-2024 23:13:37

Data Format = 1D COMPLEX  
Dir\_Size = 2624  
X\_Domain = Carbon13  
Dir\_Title = Carbon13  
Dir\_Units = (ppm)  
Dimensions = X  
Spectrometer = JNM-ECZ600R/S3

Field\_Strength = 14.05636928(T) (600[MHz])  
X\_Acq\_Duration = 0.69206016[s]  
X\_Domain = Carbon13  
X\_Freq = 150.91343039[MHz]  
X\_Offset = 100[ppm]  
X\_Points = 32768  
X\_Prescans = 1  
X\_Resolution = 1.44496109[Hz]  
X\_Sweep = 47.34848485[kHz]  
X\_Sweep\_Clipped = 37.87878788[kHz]  
Irr\_Domain = Proton  
Irr\_Freq = 600.1723046[MHz]  
Irr\_Offset = 5[ppm]  
Blanking = 15.0[us]  
Clipped = FALSE  
Scans = 1024  
Total\_Scans = 1024

Relaxation\_Delay = 1[s]  
Recvr\_Gain = 56  
Temp\_Get = 20.6[degC]  
X\_90\_Width = 8.1[us]  
X\_Acq\_Time = 0.69206016[s]  
X\_Angle = 30[deg]  
X\_Atn = 11[dB]  
X\_Pulse = 2.7[us]  
Irr\_Atn\_Dec = 25.803[dB]  
Irr\_Atn\_Dec\_Calc = 25.803[dB]  
Irr\_Atn\_Dec\_Default\_Calc = 25.803[dB]  
Irr\_Dec\_Bandwidth\_Hz = 7.23684211[kHz]  
Irr\_Dec\_Bandwidth\_Ppm = 12.05794078[ppm]  
Irr\_Dec\_Freq = 600.1723046[MHz]  
Irr\_Dec\_Merit\_Factor = 2.2  
Irr\_Decoupling = NONE  
Irr\_Noise = FALSE  
Irr\_Noise = WAIT2  
Irr\_Offset\_Default = 5[ppm]  
Irr\_Pwrdth = 76[us]  
Irr\_Pwrdth\_Default = 76[us]  
Irr\_Pwrdth\_Default\_Calc = 76[us]  
Irr\_Pwrdth\_Temp1 = 76[us]  
Irr\_Wurst = FALSE  
Denatation\_Rate = 0  
Initial\_Wait = 1[s]  
Noe\_Time = 1[s]  
Noe\_Time\_Play = FALSE  
Relaxation\_Delay\_Calc = 0[s]  
Relaxation\_Delay\_Temp = 1[s]  
Repetition\_Time = 1.69206016[s]

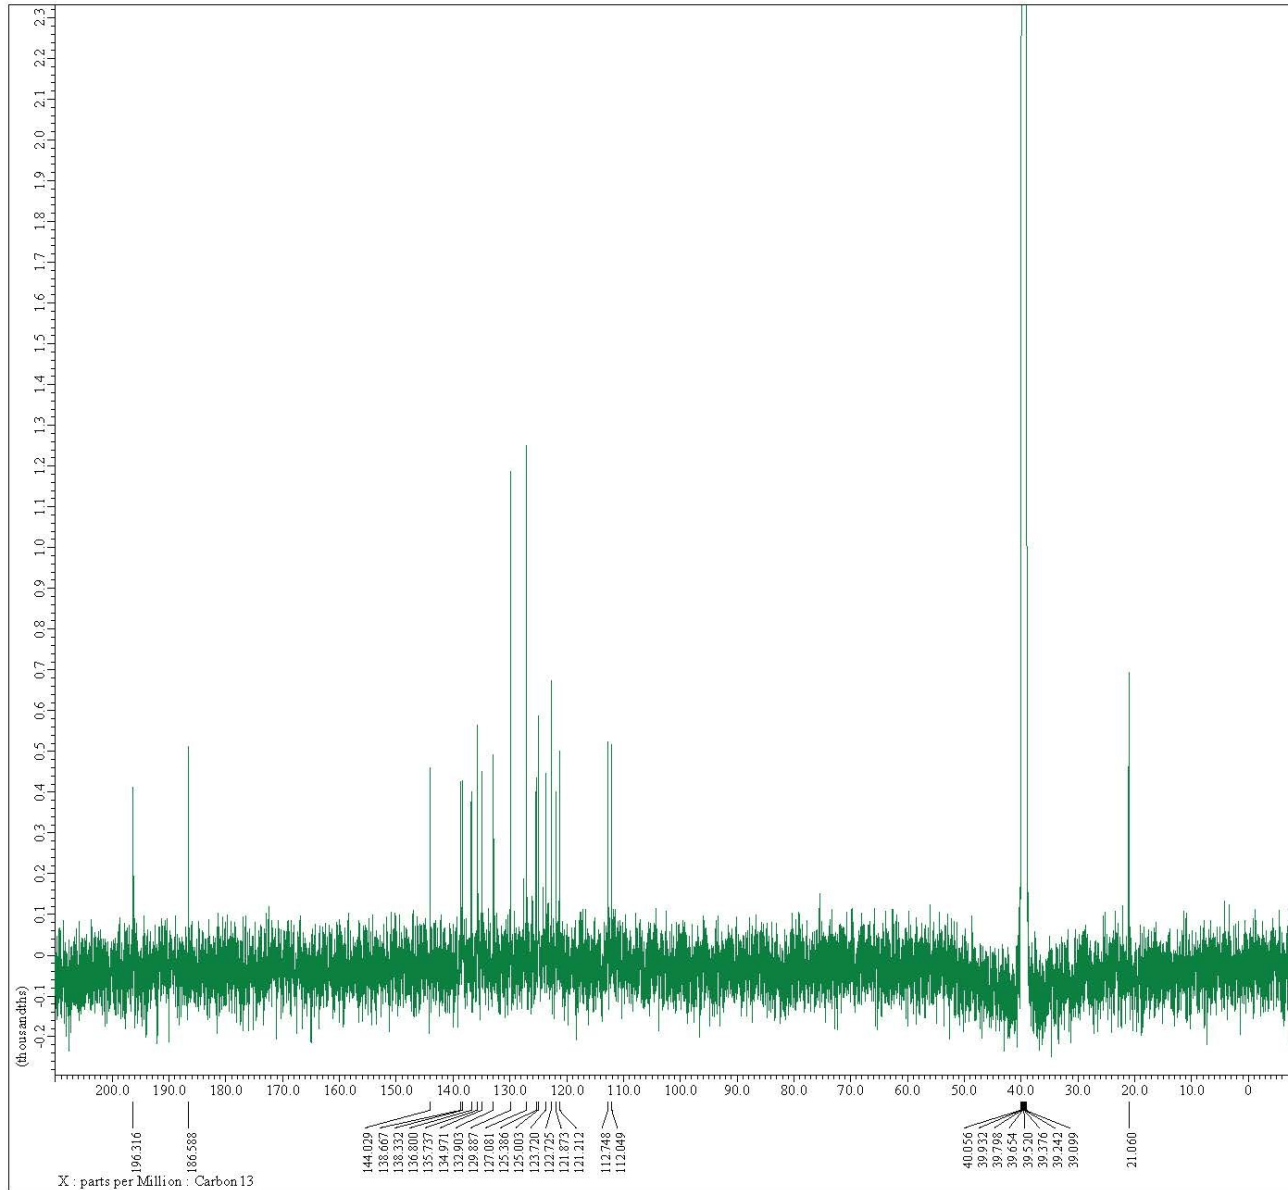



---- PROCESSING PARAMETERS ----  
sepf( 0.2[Hz], 0.0[s] )  
trapezoid( 0[Hz], 0[Hz], 80[Hz], 100[Hz] )  
zerofill( 1, TRUE )  
fft( 1, TRUE, TRUE )  
machinphase  
ppa

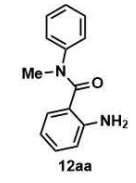

Filename = TW-6-028-2-1\_proton-1-2.jdf  
Author = delta  
Experiment = proton.jxp  
Sample\_id = TW-6-028-2-1  
Solvent = CHLOROFORM-D  
Actual\_Start\_Time = 7-MAR-2024 22:36:16  
Revision\_Time = 7-MAR-2024 22:38:47  
Comment = single pulse  
Data\_Format = 1D COMPLEX  
Dim\_Size = 26214  
X\_Domain = Proton  
Dim\_Title = Proton  
Dim\_Units = [ppm]  
Dimensions = X  
Spectrometer = JNM-ECZ600R/S3  
Field\_Strength = 14.09636928(T) (600(MHz))  
X\_Acq\_Duration = 2.18103808[s]  
X\_Domain = Proton  
X\_Freq = 600.1723046(MHz)  
X\_Offset = 5[ppm]  
X\_Points = 32768  
X\_Prescans = 1  
X\_Resolution = 0.45849272[Hz]  
X\_Sweep = 15.02403846[KHz]  
X\_Sweep\_Clipped = 12.01823077[KHz]  
Irr\_Domain = Proton  
Irr\_Freq = 600.1723046(MHz)  
Irr\_Offset = 5[ppm]  
Tri\_Domain = Proton  
Tri\_Freq = 600.1723046(MHz)  
Tri\_Offset = 5[ppm]  
Blanking = 5.0[us]  
Clipped = FALSE  
Scans = 4  
Total\_Scans = 4  
Relaxation\_Delay = 2[s]  
Recvr\_Gain = 36  
Temp\_Set = 20.0[AC]  
X\_90\_Width = 9.9[us]  
X\_Acq\_Time = 2.18103808[s]  
X\_Angle = 45[deg]  
X\_Atn = 8.1[dB]  
X\_Pulse = 4.95[us]  
Irr\_Mode = Off  
Tri\_Mode = Off  
Dante\_Loop = 200  
Dante\_Preset = FALSE  
Decimation\_Rate = 0  
Initial\_Wait = 1[s]  
Phase = (0, 90, 270, 180, 180, 270, 90, 0)  
Preset\_Time = 2[s]  
Preset\_Time\_Flag = FALSE  
Relaxation\_Delay\_Calc = 0[s]  
Relaxation\_Delay\_Temp = 2[s]  
Repetition\_Time = 4.18103808[s]

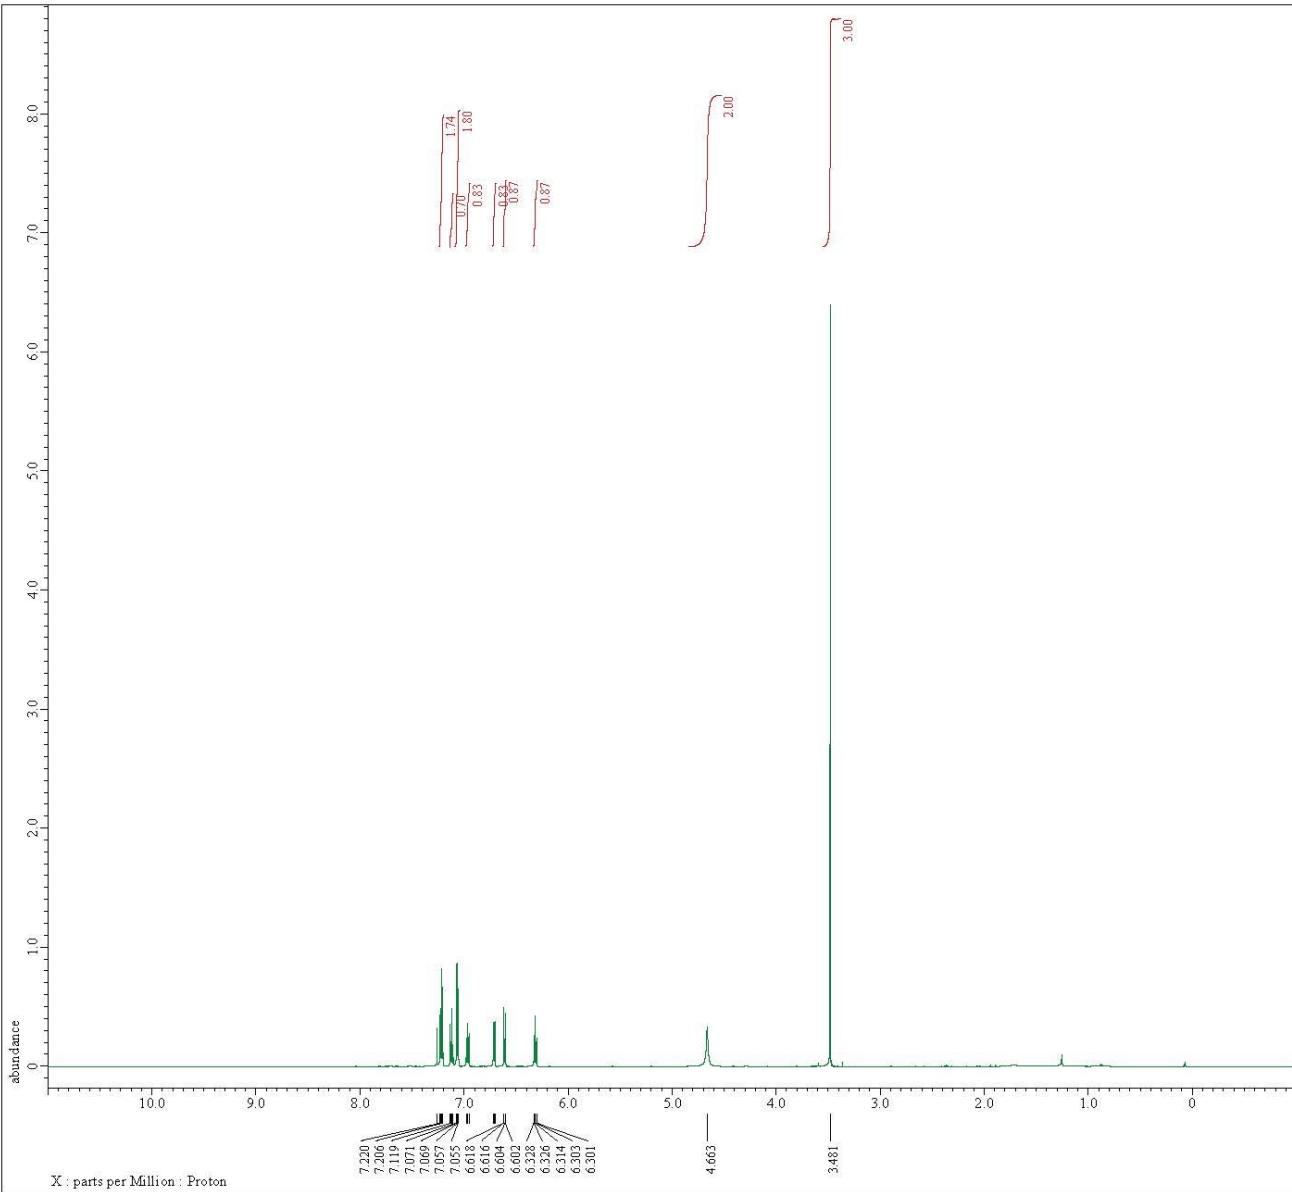



---- PROCESSING PARAMETERS ----

blip\_cld( 16, 64, 1 )  
secp( 2.0[MHz], 0.0[s] )  
fft( 1, TRUE, TRUE )  
machinephase  
ppm  
reference( 147.04034[ppm], 77.16[ppm] )

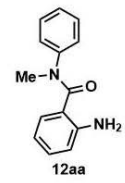

Filename = TK-6-028-2-1\_carbon-1-2.jdf  
Author = delta  
Experiment = carbon\_jcp  
Sample\_id = TK-6-028-2-1  
Solvent = CHLOROFORM-D  
Actual\_Start\_Time = 7-MAR-2024 22:38:43  
Revision\_Time = 7-MAR-2024 22:43:03  
Comment = single pulse decoupled gated NOE  
Data\_Format = 1D COMPLEX  
Dim\_Size = 26214  
X\_Domain = Carbon13  
Dim\_Title = Carbon13  
Dim\_Units = [ppm]  
Dimensions = X  
Spectrometer = JNM-ECZ600R/S3  
Field\_Strength = 14.09636928[T] (600[MHz])  
X\_Acq\_Duration = 0.69206016[s]  
X\_Domain = Carbon13  
X\_Freq = 150.91343039[MHz]  
X\_Offset = 100[ppm]  
X\_Points = 32768  
X\_Prescans = 4  
X\_Resolution = 1.44496109[Hz]  
X\_Sweep = 47.34848488[kHz]  
X\_Sweep\_Clipped = 37.87878788[kHz]  
Irr\_Domain = Proton  
Irr\_Freq = 600.1723046[MHz]  
Irr\_Offset = 0[ppm]  
Blanking = 15.0[us]  
Clipped = FALSE  
Scans = 64  
Total\_Scans = 64  
Relaxation\_Delay = 1[s]  
Recvr\_Gain = 56  
Temp\_Set = 20.0[degC]  
X\_P0\_Width = 8.1[us]  
X\_Acq\_Time = 0.69206016[s]  
X\_Angle = 30[deg]  
X\_Phn = 11[deg]  
X\_Pulse = 2.7[us]  
Irr\_Atn\_Dec = 25.803[dB]  
Irr\_Atn\_Dec\_Calc = 25.803[dB]  
Irr\_Atn\_Dec\_Default\_Calc = 25.803[dB]  
Irr\_Atn\_Max = 25.803[dB]  
Irr\_Dec\_Bandwidth\_Hz = 7.23684211[kHz]  
Irr\_Dec\_Bandwidth\_Ppm = 12.05794078[ppm]  
Irr\_Dec\_Freq = 600.1723046[MHz]  
Irr\_Dec\_Merit\_Factor = 2.2  
Irr\_Decoupling = TRUE  
Irr\_Noise = TRUE  
Irr\_Noise = WALTZ  
Irr\_Offset\_Default = 5[ppm]  
Irr\_Pwidth = 76[us]  
Irr\_Pwidth\_Default = 76[us]  
Irr\_Pwidth\_Default\_Calc = 76[us]  
Irr\_Pwidth\_Temp1 = 76[us]  
Irr\_Wurst = FALSE  
Decimation\_Rate = 0  
Initial\_Wait = 1[s]  
Noe\_Time = 1[s]  
Noe\_Time\_Play = FALSE  
Relaxation\_Delay\_Calc = 0[s]  
Relaxation\_Delay\_Temp = 1[s]  
Repetition\_Time = 1.69206016[s]

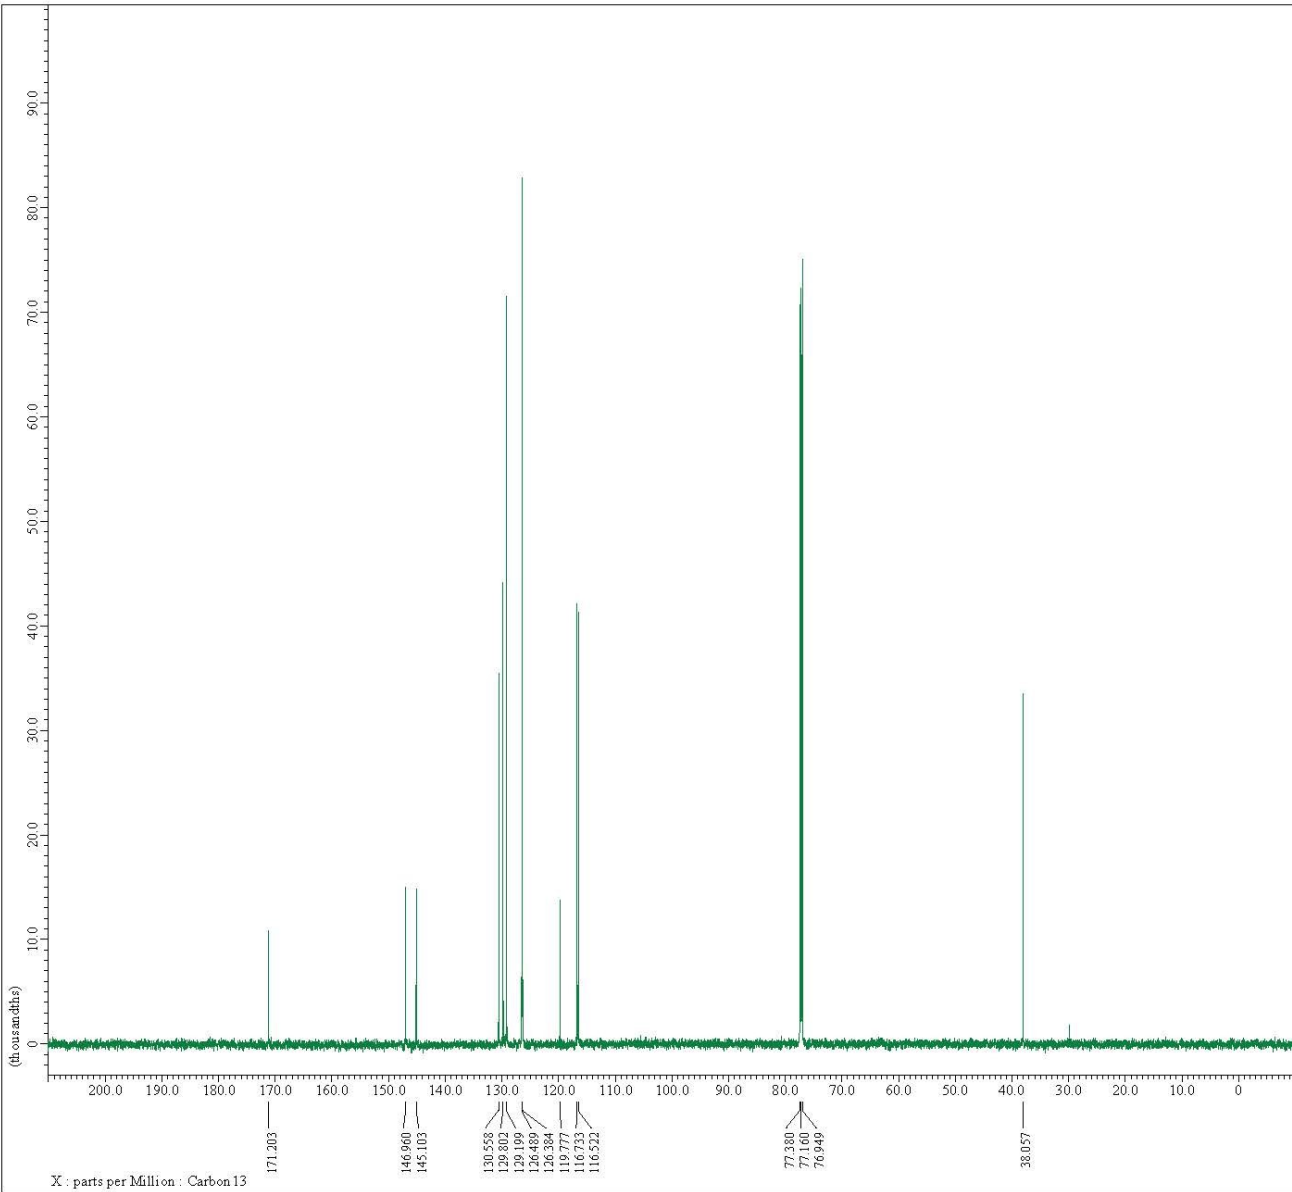

X : parts per Million : Carbon13

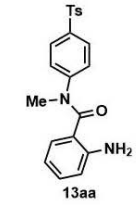

---- PROCESSING PARAMETERS ----  
sexp( 0.2[Hz], 0.0[s] )  
trapzoid( 0[Hz], 0[Hz], 80[Hz], 100[Hz] )  
zerofill( 1, TRUE )  
fft( 1, TRUE, TRUE )  
machephase  
ppm

Filename = TR-6-028-1-2\_proton-1-3.jdf  
Author = delta  
Experiment = proton.jsp  
Sample\_Id = TR-6-028-1-2  
Solvent = CHLOROFORM-D  
Actual\_Start\_Time = 7-MAR-2024 22:21:21  
Revision\_Time = 8-MAR-2024 10:50:56  
Comment = single pulse  
Data\_Format = 1D\_COMPLEX  
Dim\_Size = 26214  
X\_Domain = Proton  
Y\_Domain = Proton  
X\_Offset = 5[ppm]  
X\_Points = 32768  
X\_Frequencies = 1  
X\_Resolution = 0.45849727[Hz]  
X\_Sweep = 15.02403846[kHz]  
X\_Sweep\_Clipped = 12.01923077[kHz]  
IFR\_Domain = Proton  
IFR\_Freq = 600.1723046[MHz]  
IFR\_Offset = 5[ppm]  
Tri\_Domain = Proton  
Tri\_Freq = 600.1723046[MHz]  
Tri\_Offset = 5[ppm]  
Blanking = 5.0[us]  
Clipped = FALSE  
Scans = 4  
Total\_Scans = 4  
Relaxation\_Delay = 2[s]  
Recvr\_Gain = 36  
Temp\_Set = 20.9[degC]  
X\_90\_Pulse = 9.9[us]  
X\_Acq\_Time = 2.18103808[s]  
X\_Angle = 45[deg]  
X\_Arc = 8.1[deg]  
X\_Pulse = 4.95[us]  
IFR\_Mode = Off  
Tri\_Mode = Off  
Dante\_Loop = 200  
Dante\_Preset = FALSE  
Decimation\_Rate = 0  
Initial\_Wait = 1[s]  
Phase = ( 0, 90, 270, 180, 180, 270, 90, 0 )  
Preset\_Time = 2[s]  
Preset\_Time\_Flag = FALSE  
Relaxation\_Delay\_Calc = 0[s]  
Relaxation\_Delay\_Temp = 2[s]  
Repetition\_Time = 4.18103808[s]

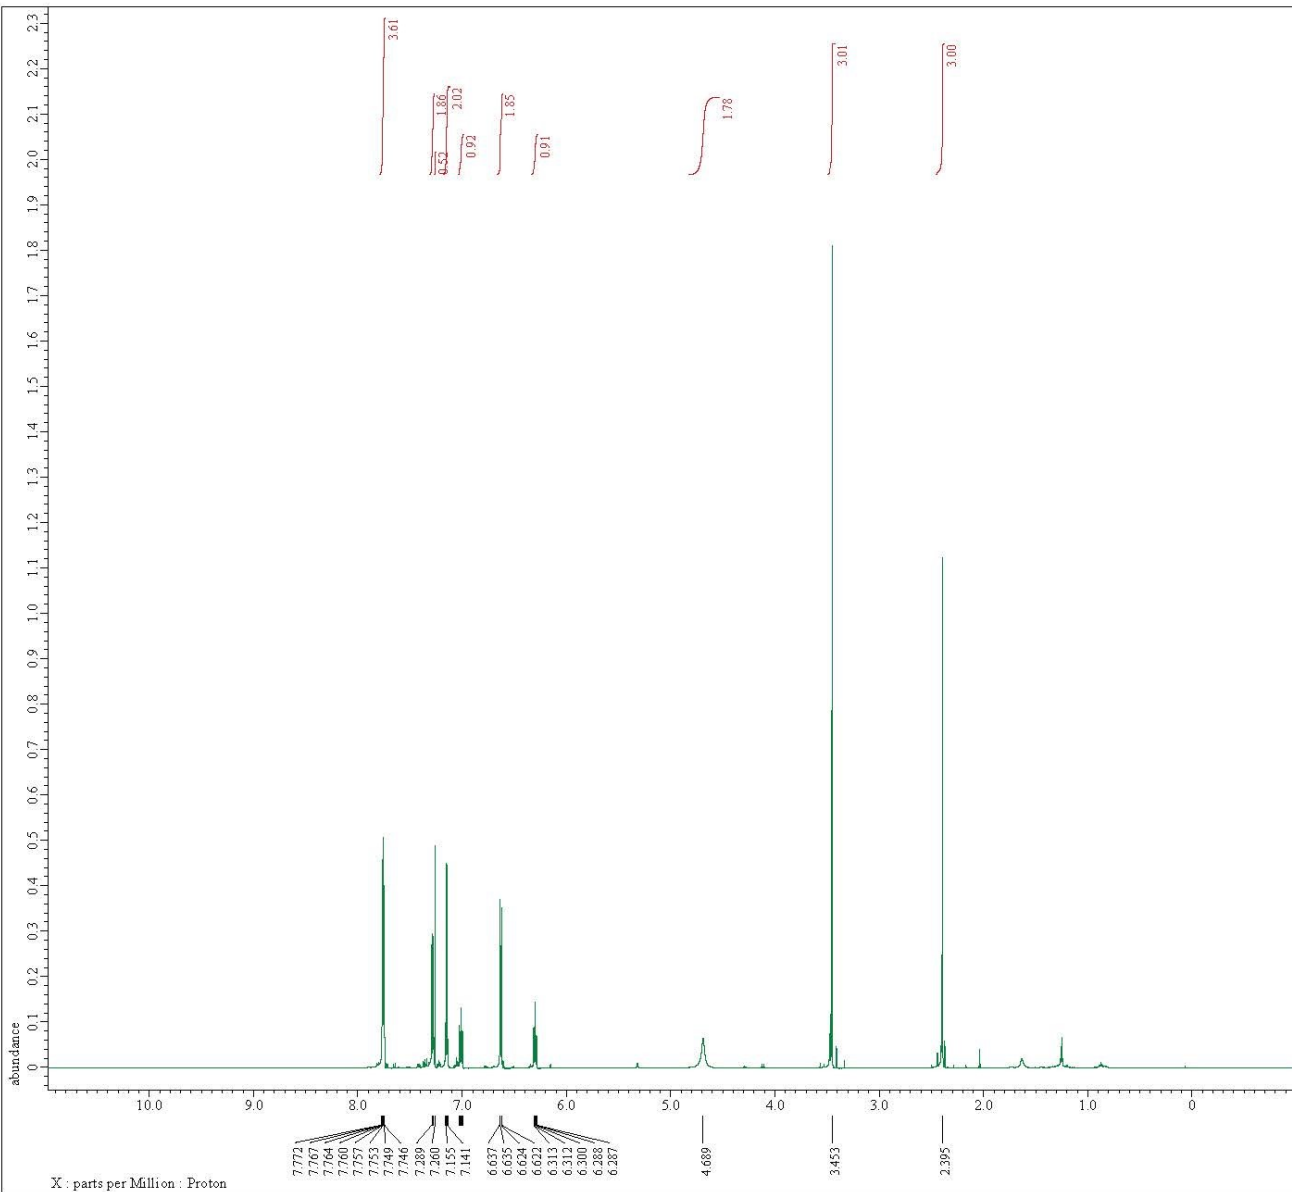



---- PROCESSING PARAMETERS ----  
blip\_cld(15, 64, 1)  
sezp( 2.0[Hz], 0.0[s] )  
fit( 1, TRUE, TRUE )  
machinephase  
ppm

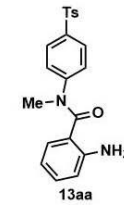

Filename = TK-6-028-1-2\_carbon-1-2.jdf  
Author = delta  
Experiment = carbon\_jsp  
Sample Id = TK-6-028-1-2  
Solvent = CHLOROFORM-D  
Actual\_Start\_Time = 7-MAR-2024 22:23:36  
Revision\_Time = 7-MAR-2024 22:26:29

Comment = single pulse decoupled gated NOE  
Data\_Format = 1D COMPLEX  
Dim\_Size = 26214  
X\_Domain = Carbon13  
Y\_Domain = Carbon13  
Dim\_Units = [ppm]  
Dimensions = X  
Spectrometer = JNM-EC2600R/S3

Field\_Strength = 14.0963628[T] (600[MHz])  
X\_Acq\_Duration = 0.69206016[s]  
X\_Domain = Carbon13  
X\_Freq = 150.91343039[MHz]  
X\_Offset = 100[ppm]  
X\_Points = 32768  
X\_Prescans = 4  
X\_Resolution = 1.44496109[Hz]  
X\_Sweep = 47.34848488[kHz]  
X\_Sweep\_Clipped = 37.87878788[kHz]  
Irr\_Domain = Proton  
Irr\_Freq = 600.1723046[MHz]  
Irr\_Offset = 5[ppm]  
BLANKING = 15.0[us]  
Clipped = FALSE  
Scans = 47  
Total\_Scans = 47

Relaxation\_Delay = 1[s]  
Recvr\_Gain = 56  
Temp\_Dec = 20.9[deg]  
X\_90\_Width = 0.11[us]  
X\_Acq\_Time = 0.69206016[s]  
X\_Angle = 30[deg]  
X\_Pns = 11[dB]  
X\_Pulse = 2.7[us]  
Irr\_Atn\_Dec = 25.803[dB]  
Irr\_Atn\_Dec\_Calc = 25.803[dB]  
Irr\_Atn\_Dec\_Default\_Calc = 25.803[dB]  
Irr\_Atn\_Noise = 25.803[dB]  
Irr\_Dec\_Bandwidth\_Hz = 7.28842111[kHz]  
Irr\_Dec\_Bandwidth\_Ppm = 12.05794078[ppm]  
Irr\_Dec\_Freq = 600.1723046[MHz]  
Irr\_Dec\_Merit\_Factor = 2.2  
Irr\_Decoupling = TRUE  
Irr\_Noise = TRUE  
Irr\_Noise = WALTZ  
Irr\_Offset\_Default = 5[ppm]  
Irr\_Width = 76[us]  
Irr\_Width\_Default = 76[us]  
Irr\_Width\_Default\_Calc = 76[us]  
Irr\_Width\_Templ = 76[us]  
Irr\_Wurst = FALSE  
Decimation\_Rate = 0  
Initial\_Wait = 1[s]  
Noe\_Time = 1[s]  
Noe\_Time\_Flag = FALSE  
Relaxation\_Delay\_Calc = 0[s]  
Relaxation\_Delay\_Temp = 1[s]  
Repetition\_Time = 1.69206016[s]

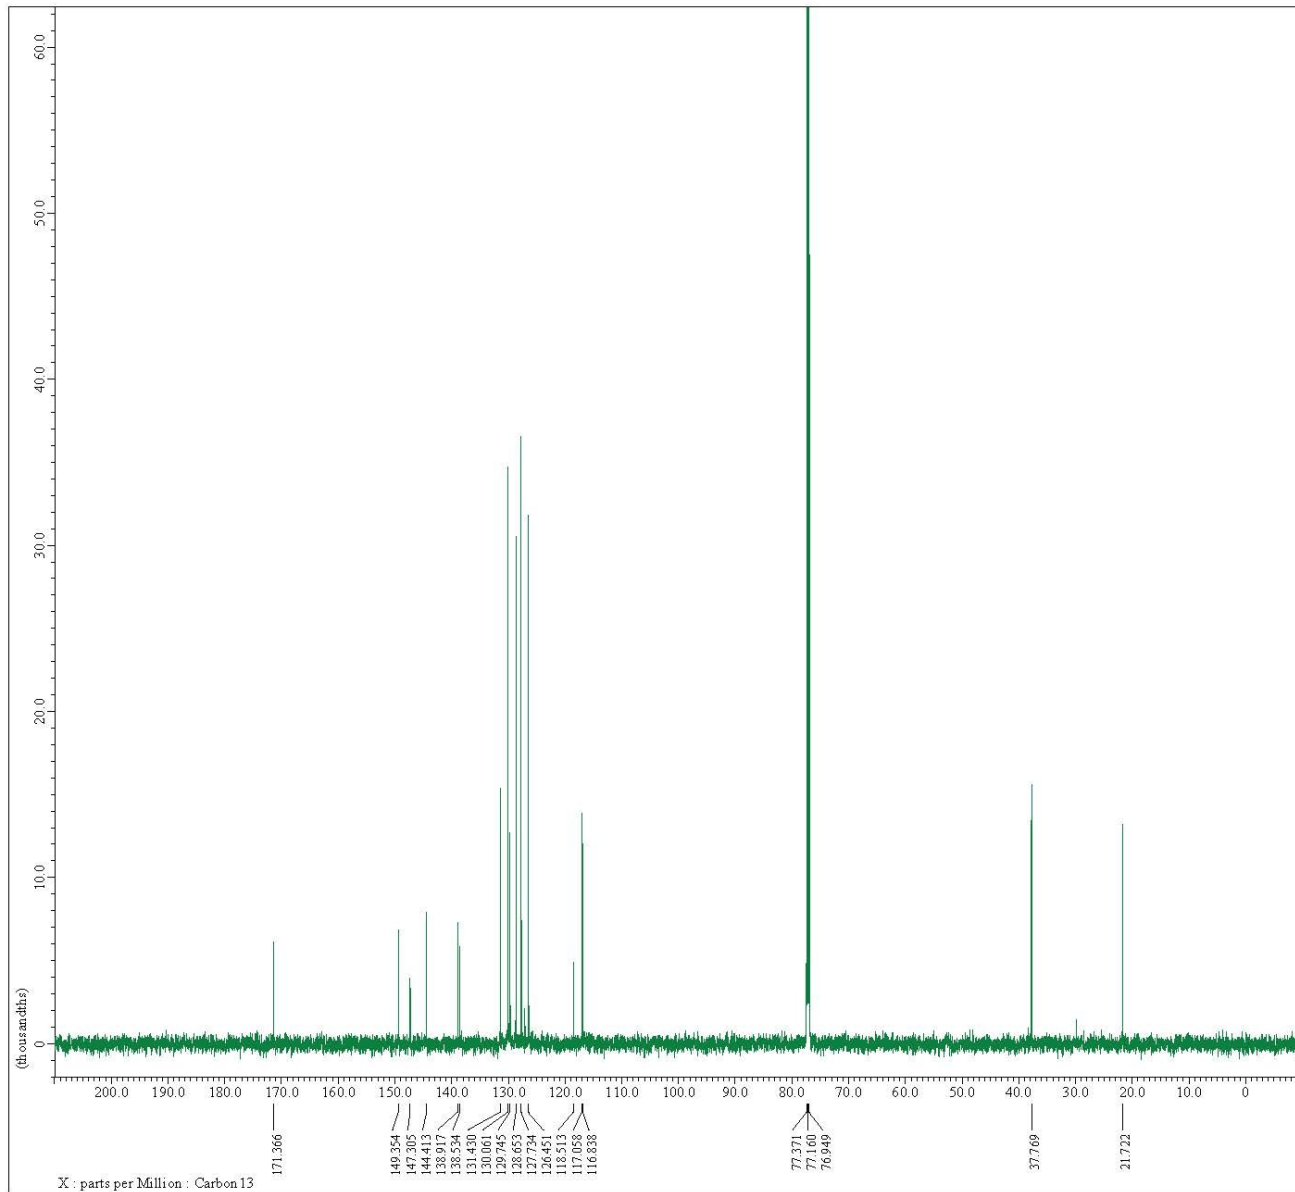

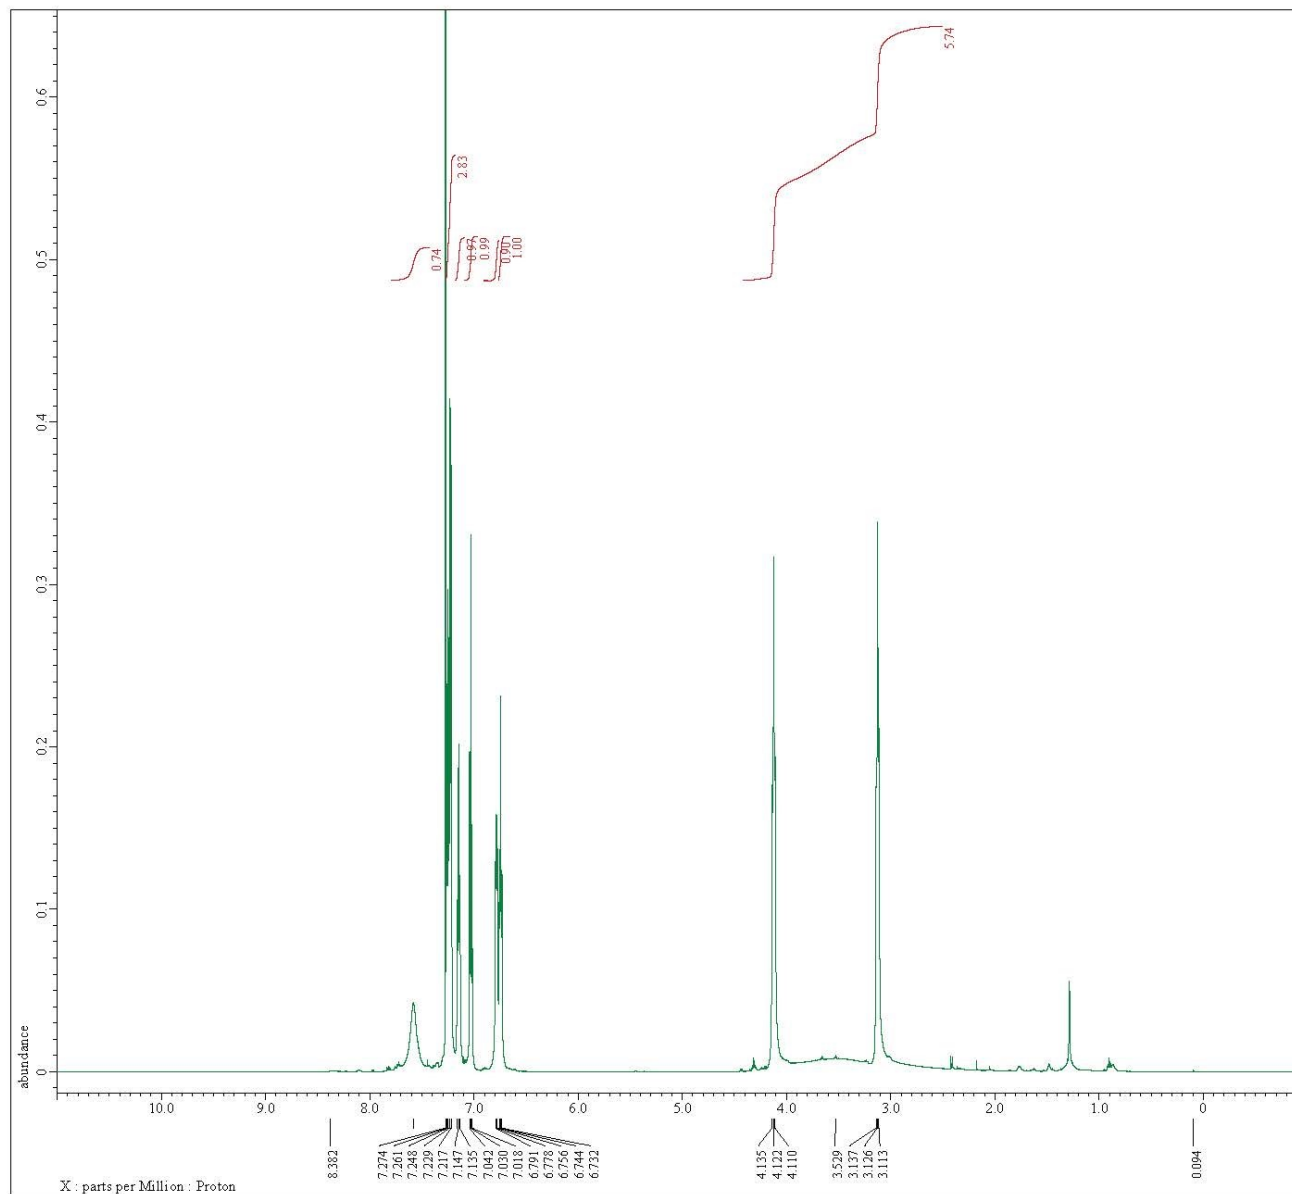

---- PROCESSING PARAMETERS ----

```

sexp( 0.2[Hz], 0.0[s] )
trapezoid( 0[Hz], 0[Hz], 80[Hz], 100[Hz] )
zerofill( 1, TRUE )
fft( 1, TRUE, TRUE )
machinephase
ppa
chresh( 0.93356[Hz], 1, )
base_correct( Akima, 5, 0, FALSE, 3, None, FALSE )
reference( 7.2463[ppm], 7.26[ppm] )

```

以下由来自: TK-6-074-1-5 proton-2-1.jdf

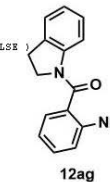

```

Filename      = TK-6-074-1-5_proton-2-3.jdf
Author        = delta
Experiment    = proton.j2p
Sample_id     = TK-6-074-1-5
Solvent       = CHLOROFORM-D
Actual_Start_Time = 23-JUN-2024 22:38:22
Version_Time  = 1-JUL-2024 20:52:20

Data Format    = 1D REAL
Data Size     = 26214
X_Domain      = Proton
Data Title    = Proton
Data Units    = (ppm)
Dimensions    = X
Spectrometer  = JNM-ECZ600R/S3

Field Strength = 14.09636928[T] (600[MHz])
Acq_Duration   = 2.18365952[s]
X_Domain       = Proton
X_Freq         = 600.1723046[MHz]
X_Offset       = 8[ppm]
X_Points       = 32768
X_Prescans     = 1
X_Resolution   = 0.45794695[Hz]
X_Sweep        = 15.0060024[KHz]
X_Sweep_Clippped = 12.00480192[KHz]
Irr_Domain     = Proton
Irr_Freq       = 600.1723046[MHz]
Irr_Offset     = 8[ppm]
Tri_Domain     = Proton
Tri_Freq       = 600.1723046[MHz]
Tri_Offset     = 8[ppm]
Blanking       = 5.0[us]
Clipped        = FALSE
Scans          = 32
Total_Scans    = 32

Relaxation_Delay = 2[s]
Recvr Gain       = 46
Temp Det        = 45[degC]
X_90_Pulse      = 9.9[us]
X_Acq Time      = 2.18365952[s]
X_Angle         = 45[deg]
X_Atn           = 8.1[dB]
X_Pulse         = 4.95[us]
Irr_Mode        = Off
Tri_Mode        = Off
Dante Loop      = 200
Dante_Preset    = FALSE
Decimation_Rate = 0
Initial_Wait    = 1[s]
Phase           = (0, 90, 270, 180, 180, 270, 90, 0)
Preset_Time     = 2[s]
Preset_Time_Play = FALSE
Relaxation_Delay_Calc = 0[s]
Relaxation_Delay_Temp = 2[s]
Repetition_Time = 4.18365952[s]

```



---- PROCESSING PARAMETERS ----  
blip\_cld(15, 64, 1)  
sezp(2.0[Hz], 0.0[s])  
fit(1, TRUE, TRUE)  
machinephase  
ppm

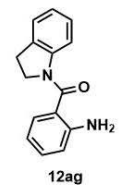

Filename = TK-6-074-1-5\_carbon-1-3.jdf  
Author = delta  
Experiment = carbon\_jsp  
Sample Id = TK-6-074-1-5  
Solvent = CHLOROFORM-D  
Actual\_Start\_Time = 29-JUN-2024 21:41:53  
Revision\_Time = 1-JUL-2024 20:47:14

Data Format = 1D COMPLEX  
Dia\_Size = 2624  
X\_Domain = Carbon13  
Dia\_Title = Carbon13  
Dia\_Units = (ppm)  
Dimensions = X  
Spectrometer = JNM-ECZ600R/S3

Field\_Strength = 14.05636928[T] (600[MHz])  
X\_Acq\_Duration = 0.69206016[s]  
X\_Domain = Carbon13  
X\_Freq = 150.91343039[MHz]  
X\_Offset = 100[ppm]  
X\_Points = 32768  
X\_Prescans = 1  
X\_Resolution = 1.44496109[Hz]  
X\_Sweep = 47.34848485[kHz]  
X\_Sweep\_Clippped = 37.87878788[kHz]  
Irr\_Domain = Proton  
Irr\_Freq = 600.1723046[MHz]  
Irr\_Offset = 5[ppm]  
Blanking = 15.0[us]  
Clipped = FALSE  
Scans = 128  
Total\_Scans = 128

Relaxation\_Delay = 1[s]  
Recvr\_Gain = 55  
Temp\_Get = 21.9[dC]  
X\_90\_Width = 8.1[us]  
X\_Acq\_Time = 0.69206016[s]  
X\_Angle = 30[deg]  
X\_Atn = 11[dB]  
X\_Pulse = 2.7[us]  
Irr\_Atn\_Dec = 25.803[dB]  
Irr\_Atn\_Dec\_Calc = 25.803[dB]  
Irr\_Atn\_Dec\_Default\_Calc = 25.803[dB]  
Irr\_Dec\_Bandwidth\_Hz = 7.23684211[kHz]  
Irr\_Dec\_Bandwidth\_Ppm = 12.05794078[ppm]  
Irr\_Dec\_Freq = 600.1723046[MHz]  
Irr\_Dec\_Merit\_Factor = 2.2  
Irr\_Decoupling = TRUE  
Irr\_Noise = FALSE  
Irr\_Noise = WAIT2  
Irr\_Offset\_Default = 5[ppm]  
Irr\_Peakth = 76[us]  
Irr\_Peakth\_Default = 76[us]  
Irr\_Peakth\_Default\_Calc = 76[us]  
Irr\_Peakth\_Templ = 76[us]  
Irr\_Wurst = FALSE  
Decoupling\_Rate = 0  
Initial\_Wait = 1[s]  
Noe\_Time = 1[s]  
Noe\_Time\_Play = FALSE  
Relaxation\_Delay\_Calc = 0[s]  
Relaxation\_Delay\_Temp = 1[s]  
Repetition\_Time = 1.69206016[s]

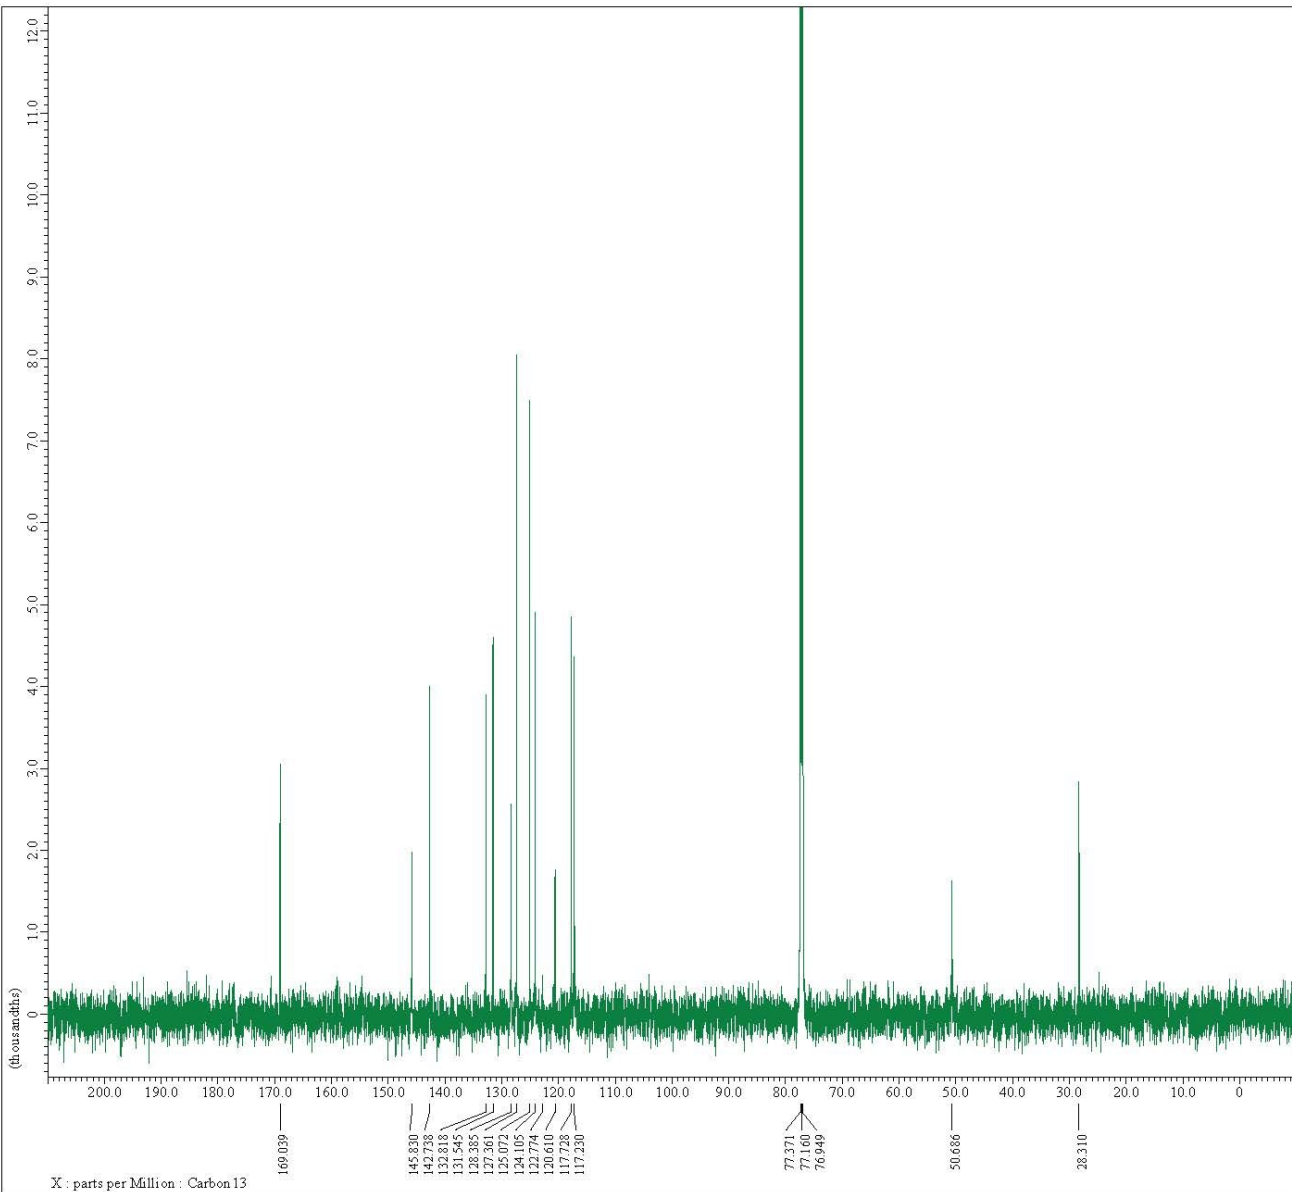

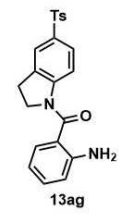

---- PROCESSING PARAMETERS ----

```
sexp( 0.2[Hz], 0.0[s] )
trapezoid( 0[Hz], 0[Hz], 80[Hz], 100[Hz] )
zerofill( 1, TRUE )
fft( 1, TRUE, TRUE )
machinephase
ppa
```

```
Filename      = TW-6-094-2_proton-1-3.jdf
Author       = delta
Experiment    = proton.jxp
Sample_id    = TW-6-094-2
Solvent      = CHLOROFORM-D
Actual_Start_Time = 24-APR-2024 16:39:18
Repetition_Time = 24-APR-2024 18:28:56

Comment      = single pulse
Data_Format  = 1D COMPLEX
Dim_Size     = 26214
X_Domain     = Proton
Dim_Title    = Proton
Dim_Units    = [ppm]
Dimensions   = X
Spectrometer = JNM-ECZ600R/S3

Field_Strength = 14.09636928(T) (600[MHz])
X_Acq_Duration = 2.90455552[s]
X_Domain       = Proton
X_Freq         = 600.1723046[MHz]
X_Offset       = 5[ppm]
X_Points       = 32768
X_Prescans     = 1
X_Resolution   = 0.34428676[Hz]
X_Sweep        = 11.28158845[kHz]
X_Sweep_Clipped = 9.0527076[MHz]
Irr_Domain     = Proton
Irr_Freq       = 600.1723046[MHz]
Irr_Offset     = 5[ppm]
Tri_Domain     = Proton
Tri_Freq       = 600.1723046[MHz]
Tri_Offset     = 5[ppm]
Blanking       = 5.0[us]
Clipped        = FALSE
Scans          = 4
Total_Scans    = 4

Relaxation_Delay = 2[s]
Recvr_Gain       = 26
Temp_Set         = 21.6[degC]
X_90_Width      = 9.9[us]
X_Acq_Time      = 2.90455552[s]
X_Angle         = 45[deg]
X_Atn           = 8.1[dB]
X_Pulse         = 4.95[us]
Irr_Mode        = Off
Tri_Mode        = Off
Dante_Loop      = 200
Dante_Preset    = FALSE
Decimation_Rate = 0
Initial_Wait    = 1[s]
Phase           = ( 0, 90, 270, 180, 180, 270, 90, 0 )
Preset_Time     = 2[s]
Preset_Time_Play = FALSE
Relaxation_Delay_Calc = 0[s]
Relaxation_Delay_Temp = 2[s]
Repetition_Time = 4.90455552[s]
```

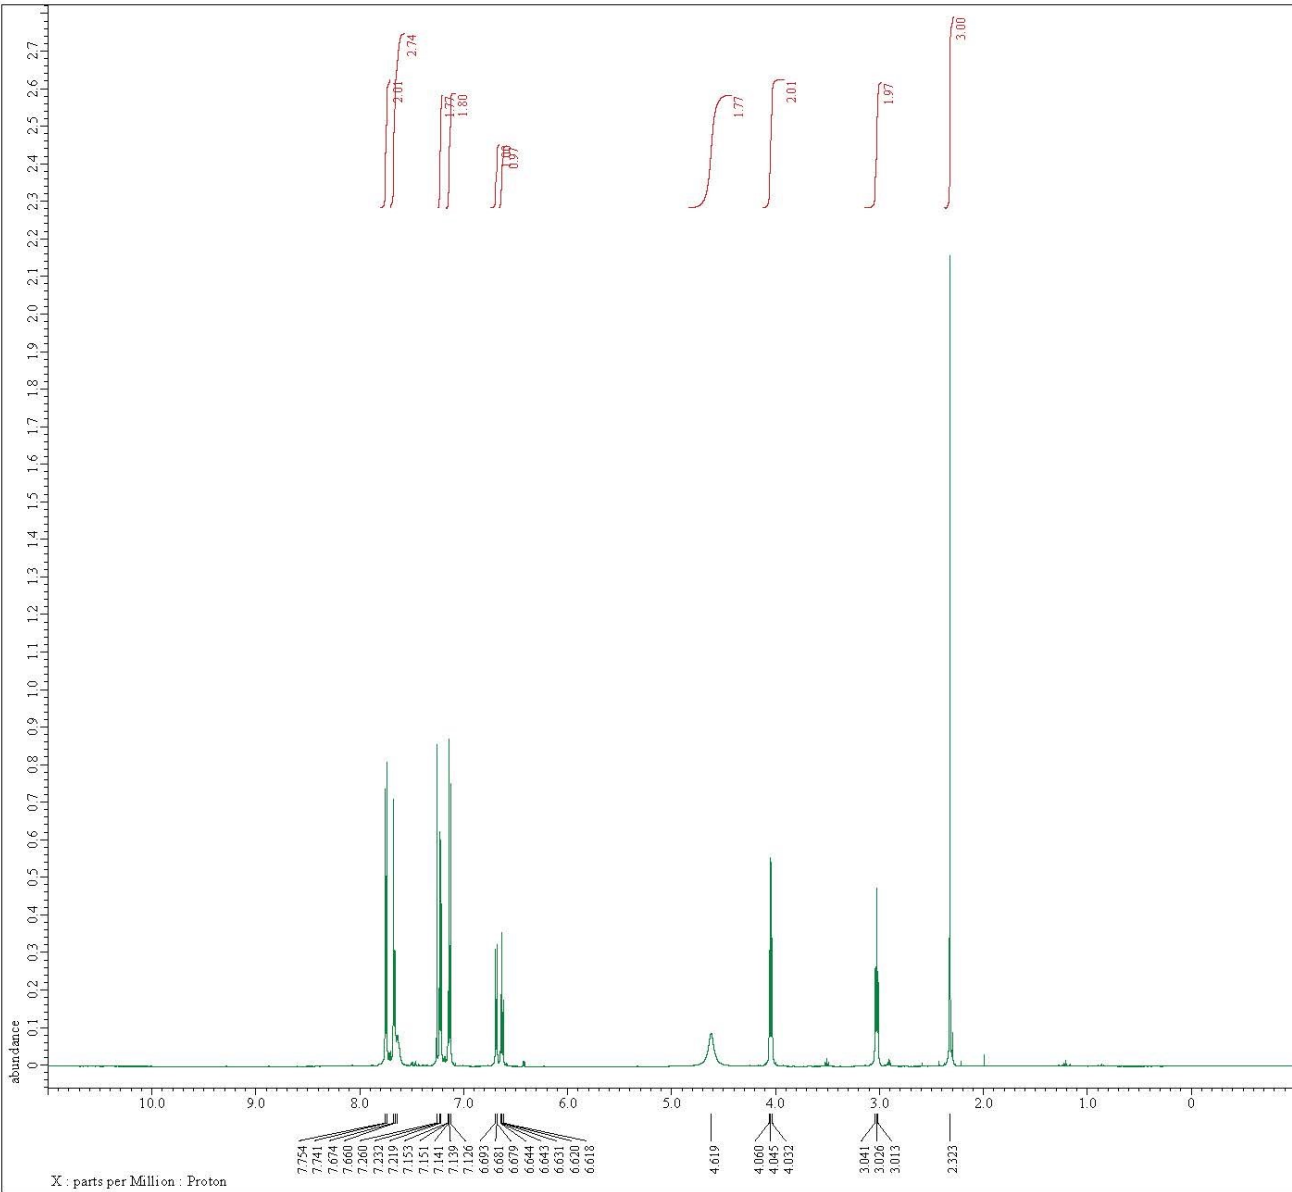



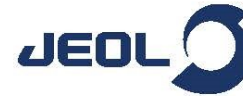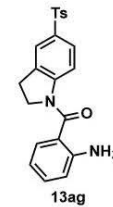

---- PROCESSING PARAMETERS ----  
blip\_cld(15, 64, 1)  
sezp(2.0[Hz], 0.0[s])  
fit(1, TRUE, TRUE)  
machinephase  
ppm

Filename = TK-6-094-2\_carbon-1-2.jdf  
Author = delta  
Experiment = carbon\_jsp  
Sample Id = TK-6-094-2  
Solvent = CHLOROFORM-D  
Actual\_Start\_Time = 24-APR-2024 16:40:15  
Revision\_Time = 24-APR-2024 16:46:55  
Comment = single pulse decoupled gated NOE  
Data\_Format = 1D COMPLEX  
Dim\_Size = 26214  
X\_Domain = Carbon13  
Y\_Domain = Carbon13  
Dim\_Units = [ppm]  
Dimensions = X  
Spectrometer = JNM-EC2600R/S3  
Field\_Strength = 14.09636328 [T] (600 [MHz])  
X\_Acq\_Duration = 0.69206016 [s]  
X\_Domain = Carbon13  
X\_Freq = 150.91343039 [MHz]  
X\_Offset = 100 [ppm]  
X\_Points = 32768  
X\_Pressure = 4  
X\_Resolution = 1.44496109 [Hz]  
X\_Sweep = 47.34848488 [kHz]  
X\_Sweep\_Clipped = 37.87978788 [kHz]  
Irr\_Domain = Proton  
Irr\_Freq = 600.1723046 [MHz]  
Irr\_Offset = 5 [ppm]  
Blanking = 15.0 [us]  
Clipped = FALSE  
Scans = 172  
Total\_Scans = 172  
Relaxation\_Delay = 1 [s]  
Recvr\_Gain = 56  
Temp\_Dec = 22 [dC]  
X\_90\_Width = 0.11 [us]  
X\_Acq\_Time = 0.69206016 [s]  
X\_Angle = 30 [deg]  
X\_Ara = 11 [dB]  
X\_Pulse = 2.7 [us]  
Irr\_Atn\_Dec = 25.803 [dB]  
Irr\_Atn\_Dec\_Calc = 25.803 [dB]  
Irr\_Atn\_Dec\_Default\_Calc = 25.803 [dB]  
Irr\_Atn\_Noise = 25.803 [dB]  
Irr\_Dec\_Bandwidth\_Hz = 7.25894211 [kHz]  
Irr\_Dec\_Bandwidth\_Ppm = 12.05794078 [ppm]  
Irr\_Dec\_Freq = 600.1723046 [MHz]  
Irr\_Dec\_Merit\_Factor = 2.2  
Irr\_Decoupling = TRUE  
Irr\_Noise = TRUE  
Irr\_Noise = WALTZ  
Irr\_Offset\_Default = 5 [ppm]  
Irr\_Pwidth = 76 [us]  
Irr\_Pwidth\_Default = 76 [us]  
Irr\_Pwidth\_Default\_Calc = 76 [us]  
Irr\_Pwidth\_Templ = 76 [us]  
Irr\_Wurst = FALSE  
Decimation\_Rate = 0  
Initial\_Wait = 1 [s]  
Noe\_Time = 1 [s]  
Noe\_Time\_Flag = FALSE  
Relaxation\_Delay\_Calc = 0 [s]  
Relaxation\_Delay\_Temp = 1 [s]  
Repetition\_Time = 1.69206016 [s]

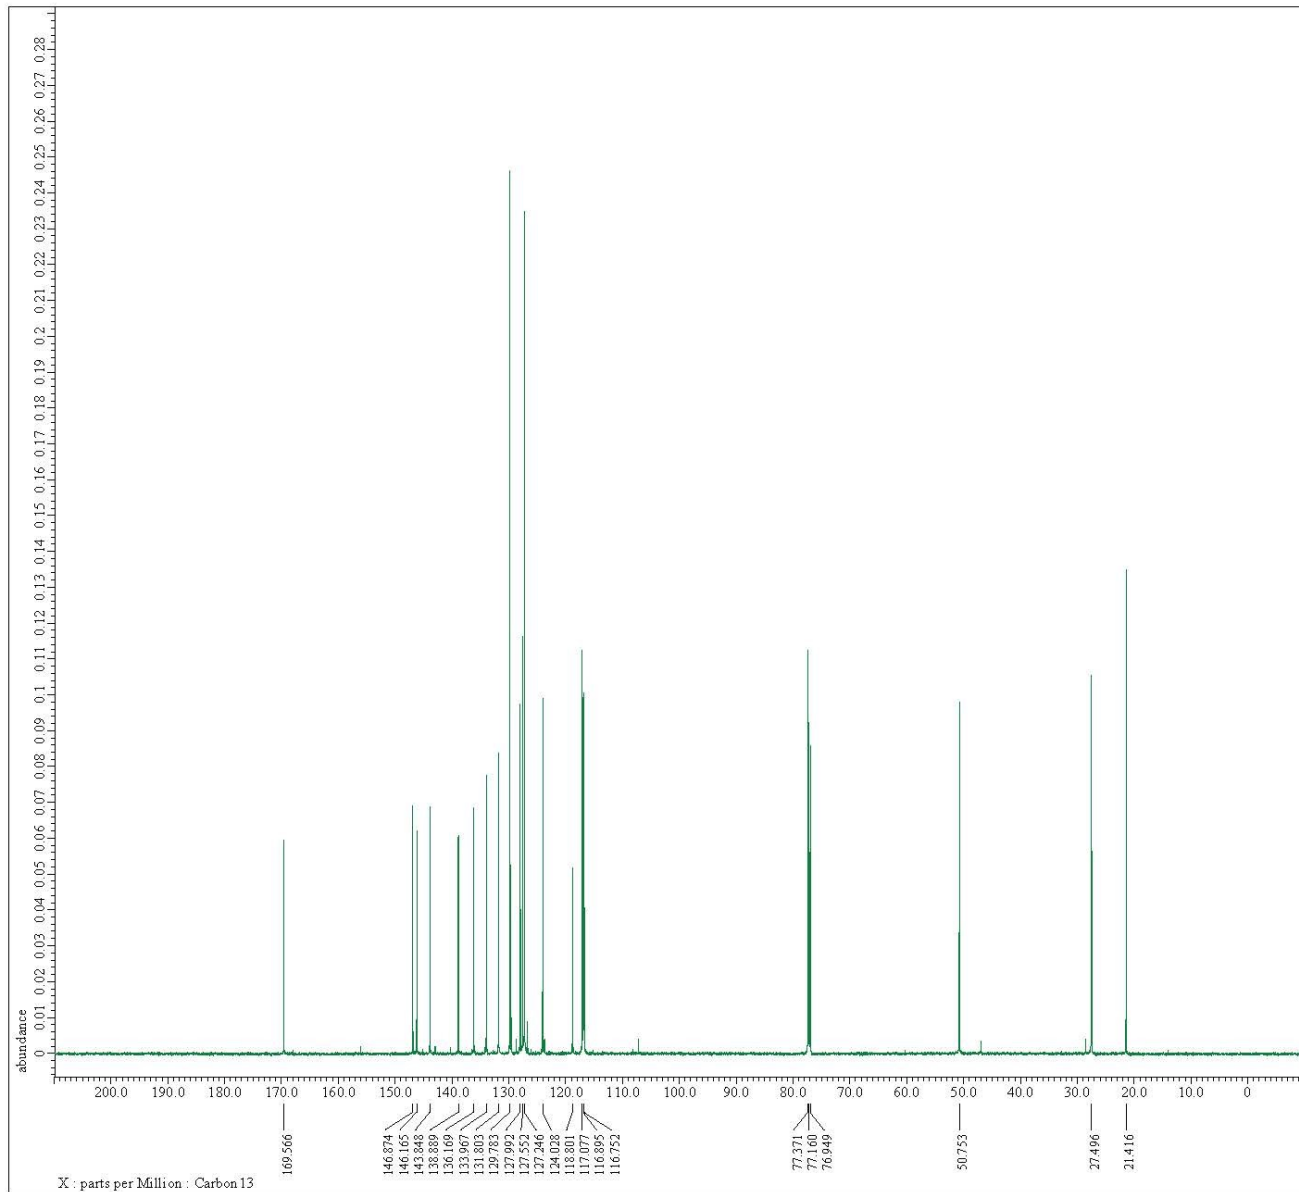



---- PROCESSING PARAMETERS ----  
sexp( 0.2[MHz], 0.0[s] )  
trapsoid( 0[Hz], 0[Hz], 80[Hz], 100[Hz] )  
zerofill( 1, TRUE )  
fit( 1, TRUE, TRUE )  
machinphase  
ppm

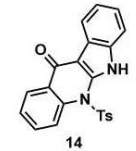

Filename = TR-6-143-1\_proton-1-3.jdf  
Author = delta  
Experiment = proton.jxp  
Sample\_Id = TR-6-143-1  
Solvent = CHLOROFORM-D  
Actual\_Start\_Time = 19-JUN-2024 21:42:44  
Revision\_Time = 20-JUN-2024 08:13:45

Data Format = 1D COMPLEX  
Da Size = 26214  
X\_Domain = Proton  
Da Title = Proton  
Da Units = (ppm)  
Dimensions = X  
Spectrometer = JNM-ECZ600R/S3

Field Strength = 14.09636928[T] (600[MHz])  
X\_AccDuration = 2.18365952[s]  
X\_Domain = Proton  
X\_Freq = 600.1723046[MHz]  
X\_Offset = 8[ppm]  
X\_Points = 32768  
X\_Prescans = 1  
X\_Resolution = 0.45794605[Hz]  
X\_Sweep = 15.0060024[kHz]  
X\_Sweep\_Clippped = 12.00480192[kHz]  
Irr\_Domain = Proton  
Irr\_Freq = 600.1723046[MHz]  
Irr\_Offset = 8[ppm]  
Tri\_Domain = Proton  
Tri\_Freq = 600.1723046[MHz]  
Tri\_Offset = 8[ppm]  
Blanking = 5.0[us]  
Clipped = FALSE  
Scans = 4  
Total\_Scans = 4

Relaxation\_Delay = 2[s]  
Recvr\_Gain = 36  
Temp\_Get = 21[degC]  
X\_90\_Width = 9.9[us]  
X\_Acc\_Time = 2.18365952[s]  
X\_Angle = 45[deg]  
X\_Atn = 8.1[db]  
X\_Pulse = 4.35[us]  
Irr\_Mode = Off  
Tri\_Mode = Off  
Danta\_Loop = 200  
Danta\_Preset = FALSE  
Decimation\_Rate = 0  
Initial\_Wait = 1[s]  
Phase = (0, 90, 270, 180, 180, 270, 90, 0)  
Preset\_Time = 2[s]  
Preset\_Time\_Flag = FALSE  
Relaxation\_Delay\_Calc = 0[s]  
Relaxation\_Delay\_Temp = 2[s]  
Repetition\_Time = 4.18365952[s]

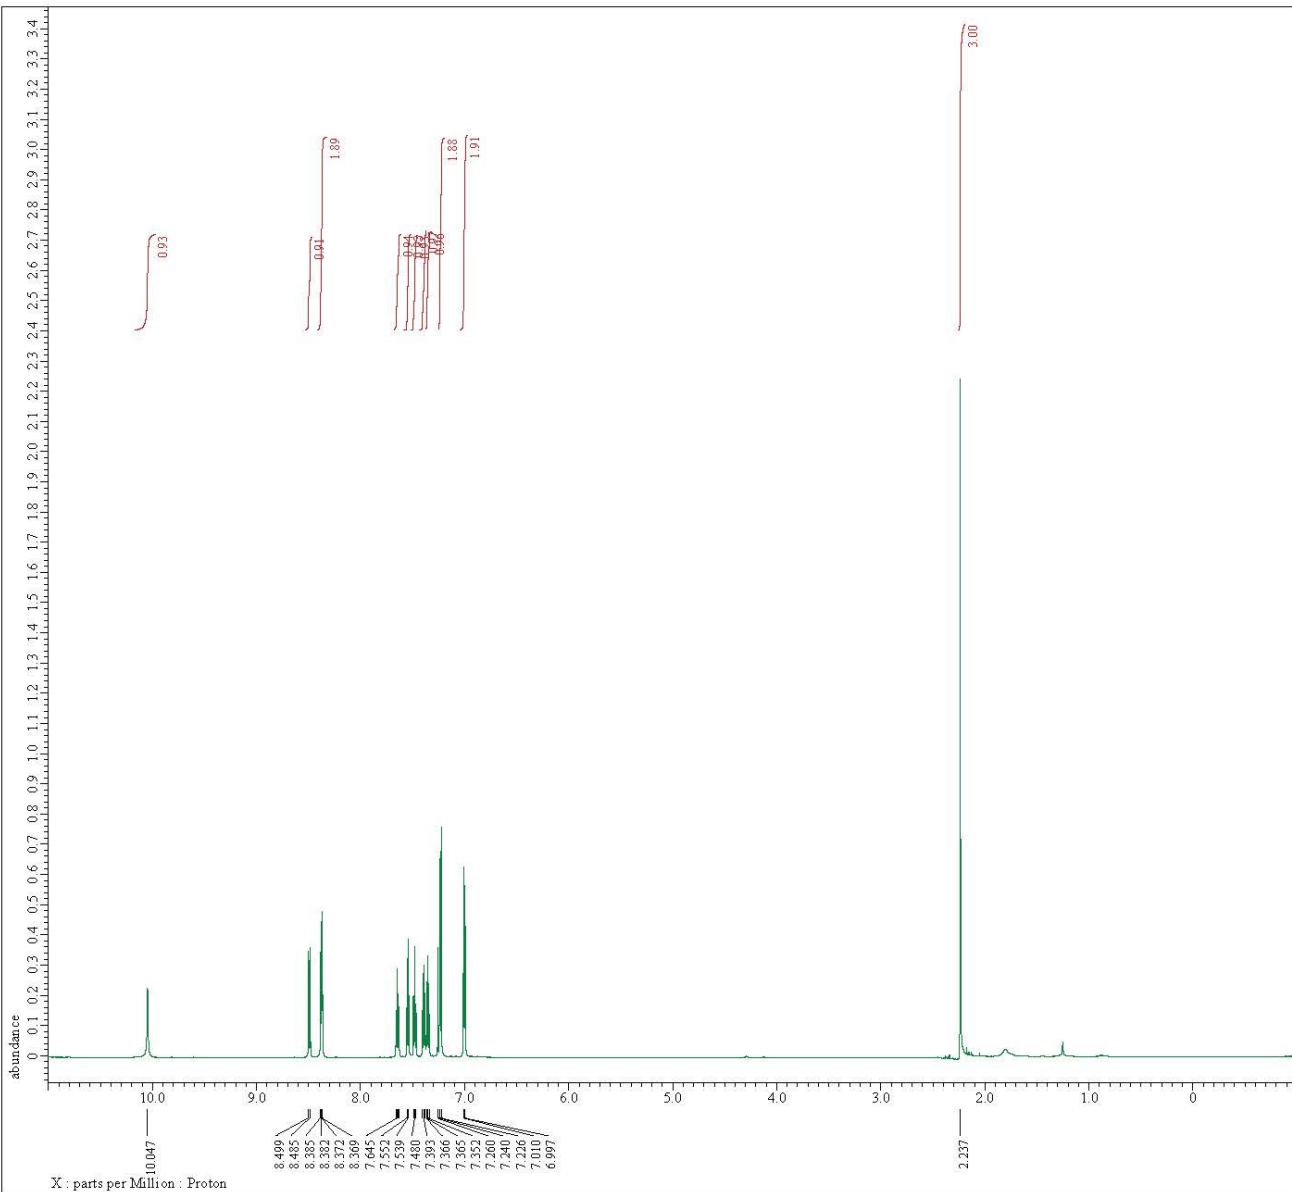



---- PROCESSING PARAMETERS ----  
blip\_cld(15, 64, 1)  
sezp(2.0[Hz], 0.0[s])  
fit(1, TRUE, TRUE)  
machinephase  
ppm

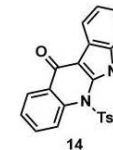

Filename = TK-6-143-1\_carbon-1-2.jdf  
Author = delta  
Experiment = carbon\_jsp  
Sample Id = TK-6-143-1  
Solvent = CHLOROFORM-D  
Actual\_Start\_Time = 19-JUN-2024 21:44:49  
Revision\_Time = 19-JUN-2024 22:04:08

Data Format = 1D COMPLEX  
Dir\_Size = 2624  
X\_Domain = Carbon13  
Dir\_Title = Carbon13  
Dir\_Units = (ppm)  
Dimensions = X  
Spectrometer = JNM-ECZ600R/S3

Field\_Strength = 14.05636928(T) (600[MHz])  
X\_Acq\_Duration = 0.69206016[s]  
X\_Domain = Carbon13  
X\_Freq = 150.91343039[MHz]  
X\_Offset = 100[ppm]  
X\_Points = 32768  
X\_Prescans = 1  
X\_Resolution = 1.44496109[Hz]  
X\_Sweep = 47.34848485[kHz]  
X\_Sweep\_Clipped = 37.87878788[kHz]  
Irr\_Domain = Proton  
Irr\_Freq = 600.1723046[MHz]  
Irr\_Offset = 5[ppm]  
Blanking = 15.0[us]  
Clipped = FALSE  
Scans = 256  
Total\_Scans = 256

Relaxation\_Delay = 1.5[s]  
Recvr\_Gain = 55  
Temp\_Get = 21.6[degC]  
X\_90\_Width = 8.1[us]  
X\_Acq\_Time = 0.69206016[s]  
X\_Angle = 30[deg]  
X\_Att = 11[dB]  
X\_Pulse = 2.7[us]  
Irr\_Atn\_Dec = 25.803[dB]  
Irr\_Atn\_Dec\_Calc = 25.803[dB]  
Irr\_Atn\_Dec\_Default\_Calc = 25.803[dB]  
Irr\_Atn\_Noise = 25.803[dB]  
Irr\_Dec\_Bandwidth\_Hz = 7.23684211[kHz]  
Irr\_Dec\_Bandwidth\_Ppm = 12.05746078[ppm]  
Irr\_Dec\_Freq = 600.1723046[MHz]  
Irr\_Dec\_Haric\_Factor = 2.2  
Irr\_Decoupling = TRUE  
Irr\_Noise = TRUE  
Irr\_Noise = WAIT  
Irr\_Offset\_Default = 5[ppm]  
Irr\_Pwldch = 76[us]  
Irr\_Pwldch\_Default = 76[us]  
Irr\_Pwldch\_Default\_Calc = 76[us]  
Irr\_Pwldch\_Templ = 76[us]  
Irr\_Whrst = FALSE  
Decimation\_Rate = 0  
Initial\_Wait = 1[s]  
Noe\_Time = 1.5[s]  
Noe\_Time\_Flag = FALSE  
Relaxation\_Delay\_Calc = 0[s]  
Relaxation\_Delay\_Temp = 1.5[s]  
Repetition\_Time = 2.19206016[s]

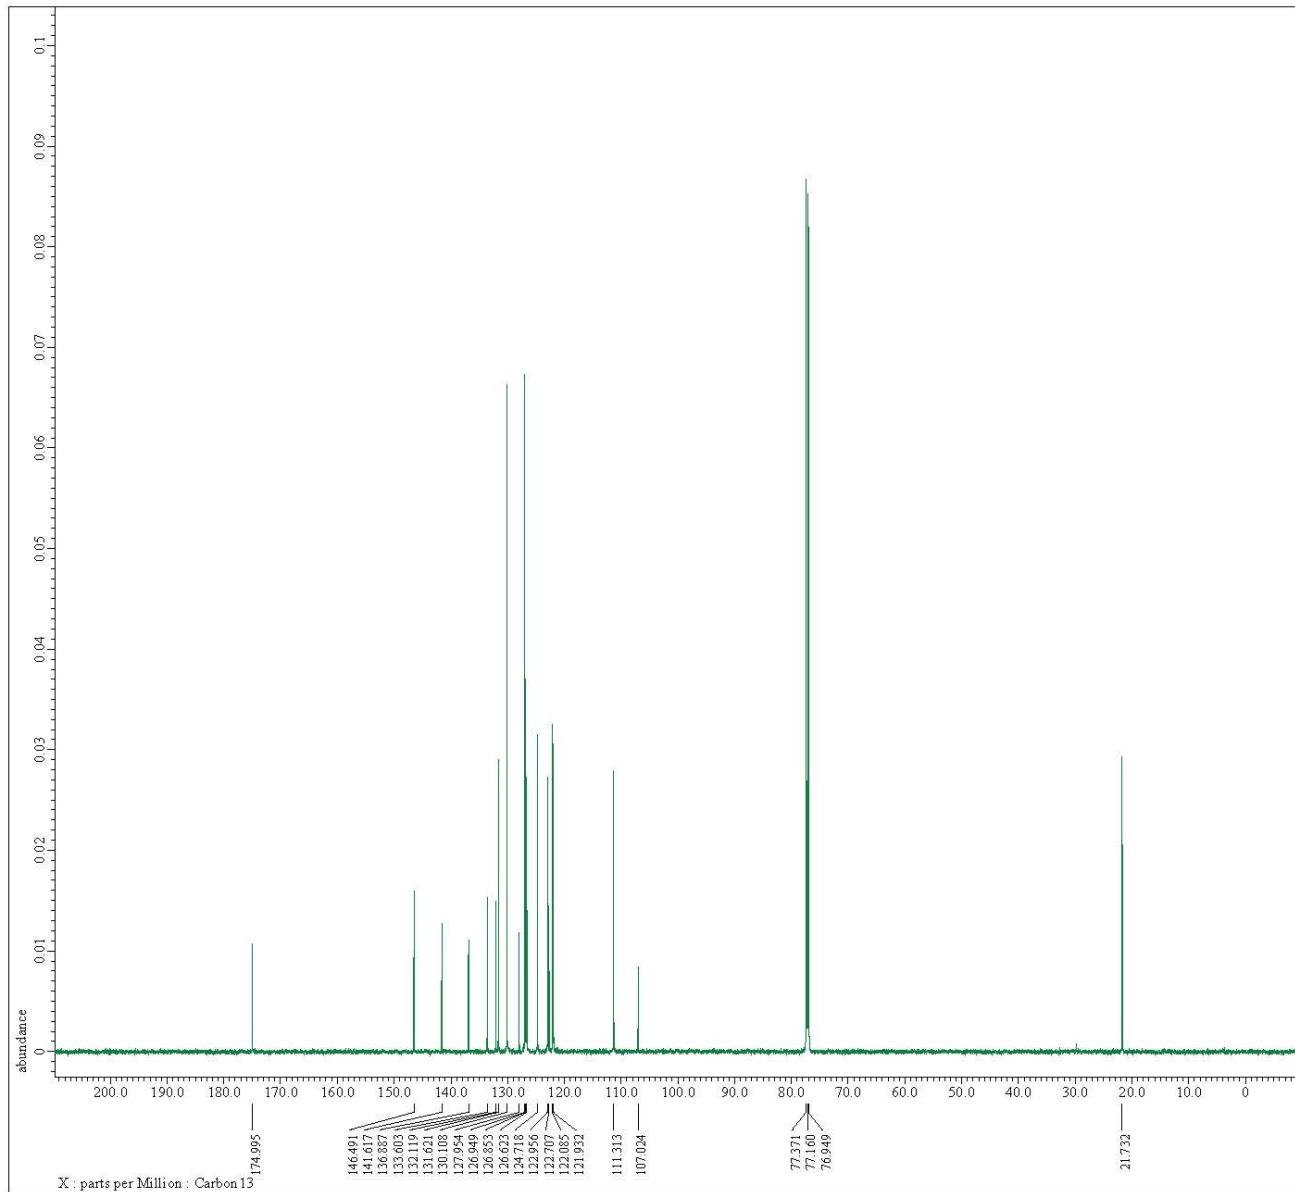



---- PROCESSING PARAMETERS ----  
sexp( 0.2[Hz], 0.0[s] )  
trapsoid( 0[Hz], 0[Hz], 80[Hz], 100[Hz] )  
zerofill( 1, TRUE )  
fft( 1, TRUE, TRUE )  
machinephase  
ppm  
base\_correct( Akima, 5, 0, FALSE, 3, None, FA  
auto\_phase( 10[Hz], FALSE, 0[Hz], 0[Hz] )

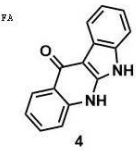

Filename = Th-6-146-1-7\_proton-2-3.jdf  
Author = delta  
Experiment = proton.jxp  
Sample\_Id = Th-6-146-1-7  
Solvent = DMSO-D6  
Actual\_Start\_Time = 23-JUN-2024 21:36:34  
Revision\_Time = 3-JUL-2024 14:13:35  
Data\_Format = 1D REAL  
Dim\_Size = 26214  
X\_Domain = Proton  
Dim\_Title = Proton  
Dim\_Units = (ppm)  
Dimensions = X  
Spectrometer = JNM-ECZ600R/S3  
Field\_Strength = 14.09636928[T] (600[MHz])  
X\_Acc\_Duration = 2.18365952[s]  
X\_Domain = Proton  
X\_Freq = 600.1723046[MHz]  
X\_Offset = 8[ppm]  
X\_Points = 32768  
X\_Prescans = 1  
X\_Resolution = 0.45794605[Hz]  
X\_Sweep = 15.0060024[kHz]  
X\_Sweep\_Clipped = 12.00480192[kHz]  
Irr\_Domain = Proton  
Irr\_Freq = 600.1723046[MHz]  
Irr\_Offset = 8[ppm]  
Tri\_Domain = Proton  
Tri\_Freq = 600.1723046[MHz]  
Tri\_Offset = 8[ppm]  
Blanking = 5.0[us]  
Clipped = FALSE  
Scans = 8  
Total\_Scans = 8  
Relaxation\_Delay = 2[s]  
Recvr\_Gain = 46  
Temp\_Get = 50[degC]  
X\_90\_Width = 9.9[us]  
X\_Acc\_Time = 2.18365952[s]  
X\_Angle = 45[deg]  
X\_Atn = 8.1[db]  
X\_Pulse = 4.35[us]  
Irr\_Mode = Off  
Tri\_Mode = Off  
Dante\_Loop = 200  
Dante\_Preset = FALSE  
Decimation\_Rate = 0  
Initial\_Wait = 1[s]  
Phase = (0, 90, 270, 180, 180, 270, 90, 0)  
Preset\_Time = 2[s]  
Preset\_Time\_Flag = FALSE  
Relaxation\_Delay\_Calc = 0[s]  
Relaxation\_Delay\_Temp = 2[s]  
Repetition\_Time = 4.18365952[s]

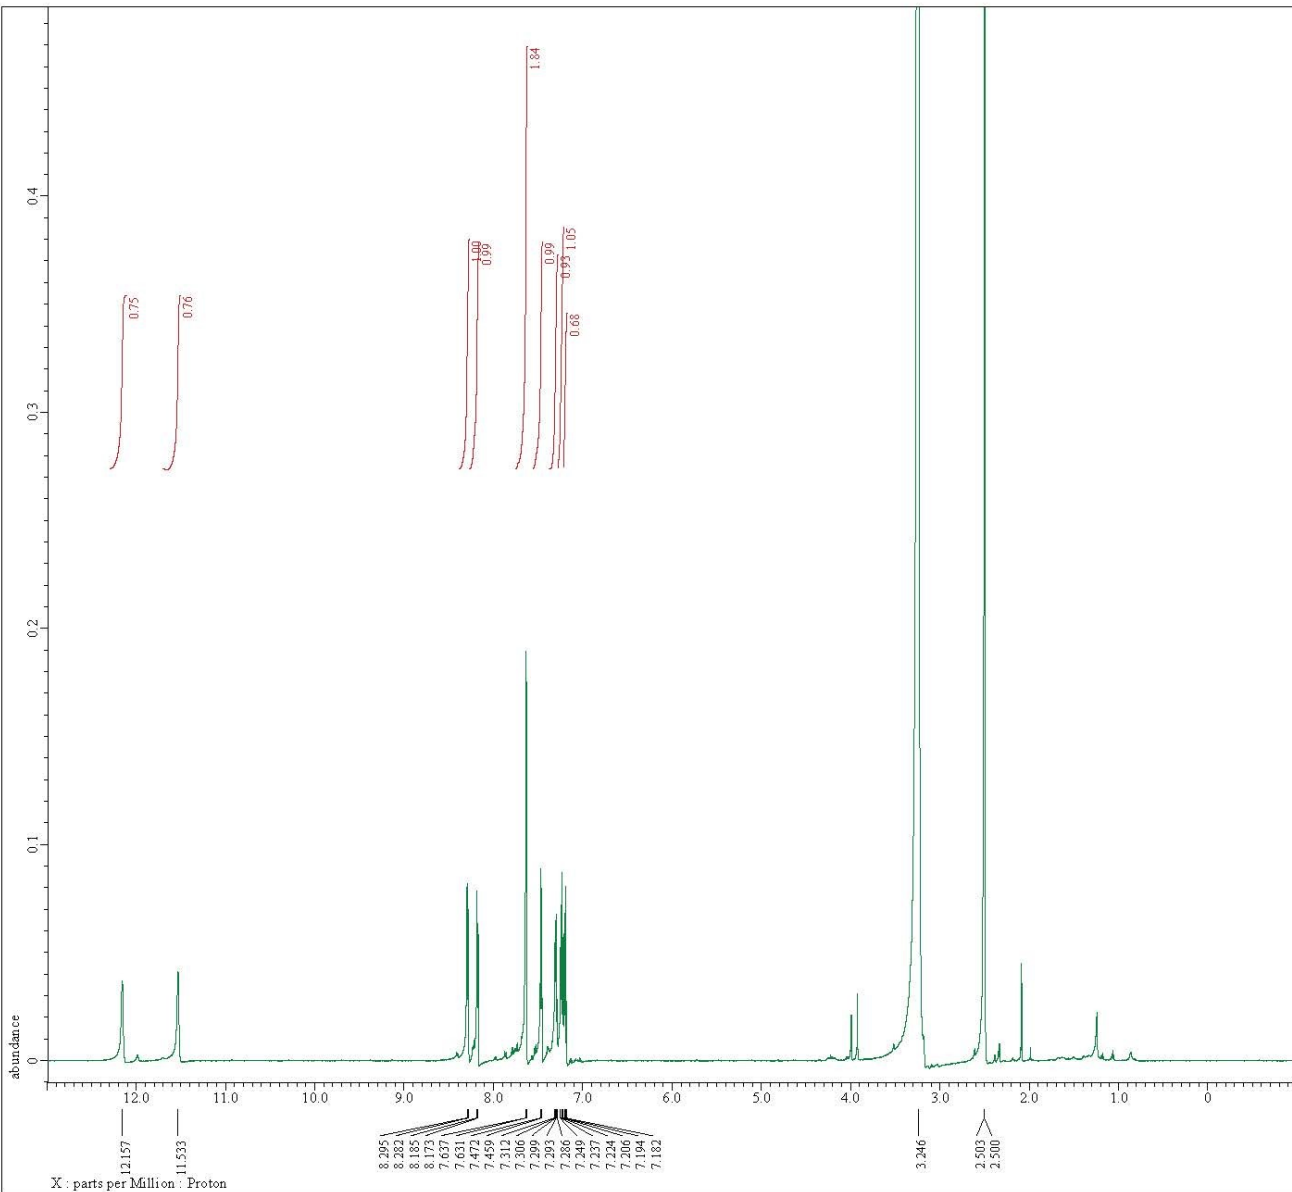



---- PROCESSING PARAMETERS ----  
blip\_cld( 16, 64, 1 )  
serp( 2.0[Hz], 0.0[s] )  
fft( 1, TRUE, TRUE )  
machinephase  
PPM  
reference( 40.01408[ppm], 39.52[ppm] )  
phase( -0.25, 0, 20[°] )  
lbase\_correct( , FALSE, FALSE, FALSE )

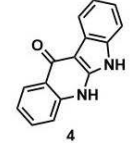

Filename = TK-6-146-1-7\_carbon-1-2.jdf  
Author = delta  
Experiment = carbon\_jsp  
Sample\_id = TK-6-146-1-7  
Solvent = DMSO-D6  
Actual\_Start\_Time = 28-JUN-2024 22:09:17  
Revision\_Time = 28-JUN-2024 22:58:51

Data Format = 1D REAL  
Data Size = 26214  
X\_Domain = Carbon13  
Data Title = Carbon13  
Data Units = [ppm]  
Dimensions = X  
Spectrometer = JNM-ECZ600R/S3

Field Strength = 14.09636928[T] (600[MHz])  
X\_Acq\_Duration = 0.69206016[s]  
X\_Domain = Carbon13  
X\_Freq = 150.91343039[MHz]  
X\_Offset = 100[ppm]  
X\_Points = 32768  
X\_Prescans = 1  
X\_Resolution = 1.44496109[Hz]  
X\_Sweep = 47.34848485[kHz]  
X\_Sweep\_Clippped = 37.87878788[kHz]  
Irr\_Domain = proton  
Irr\_Freq = 600.1723046[MHz]  
Irr\_Offset = 5[ppm]  
Blanking = 15.0[us]  
Clipped = TRUE  
Scans = 1024  
Total\_Scans = 1024

Relaxation\_Delay = 1[s]  
Recvs\_Gain = 16  
Temp\_Det = 21[°C]  
X\_90\_Width = 0.11[us]  
X\_Acq\_Time = 0.69206016[s]  
X\_Angle = 30[deg]  
X\_Am = 11[dB]  
X\_Pulse = 2.7[us]  
Irr\_Am\_Dec = 25.803[dB]  
Irr\_Am\_Dec\_Calc = 25.803[dB]  
Irr\_Am\_Dec\_Default\_Calc = 25.803[dB]  
Irr\_Dec\_Bandwidth\_Hz = 7.23684211[kHz]  
Irr\_Dec\_Bandwidth\_Ppm = 12.05794079[ppm]  
Irr\_Dec\_Freq = 600.1723046[MHz]  
Irr\_Dec\_Merit\_Factor = 2.2  
Irr\_Decoupling = TRUE  
Irr\_Noise = FALSE  
Irr\_Noise = WALTZ  
Irr\_Offset\_Default = 5[ppm]  
Irr\_Period = 76[us]  
Irr\_Period\_Default = 76[us]  
Irr\_Period\_Default\_Calc = 76[us]  
Irr\_Period\_Templ = 76[us]  
Irr\_Wurst = FALSE  
Decimation\_Rate = 0  
Initial\_Wait = 1[s]  
Noe\_Time = 1[s]  
Noe\_Time\_Play = FALSE  
Relaxation\_Delay\_Calc = 0[s]  
Relaxation\_Delay\_Temp = 1[s]  
Repetition\_Time = 1.69206016[s]

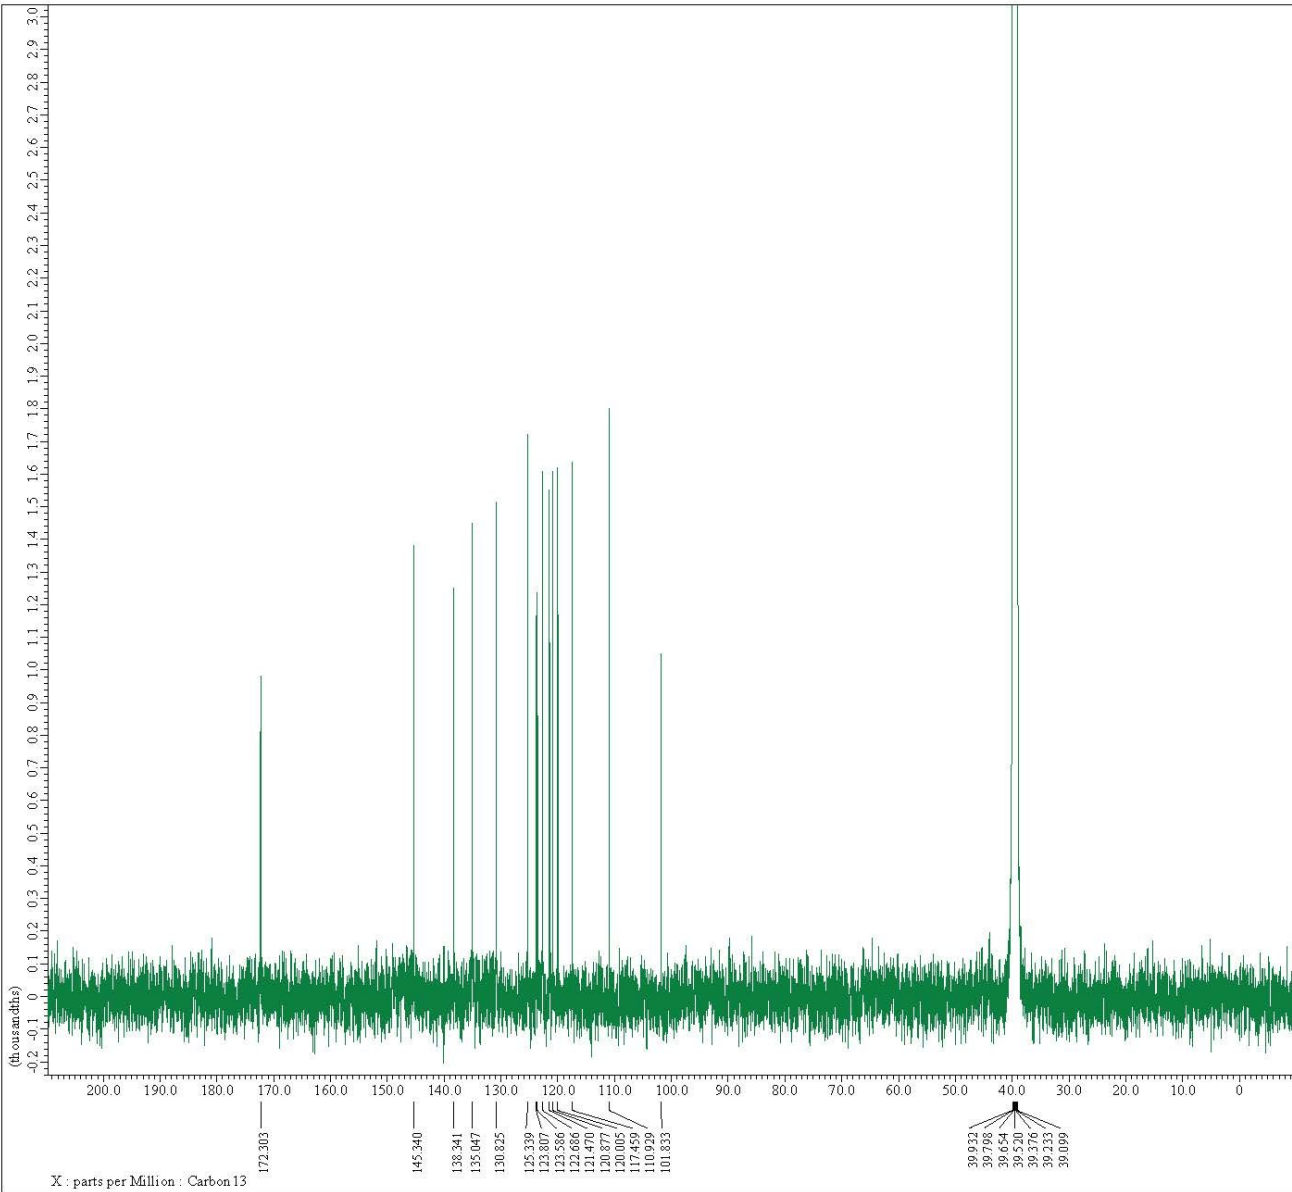



---- PROCESSING PARAMETERS ----  
sepf( 0.2[Hz], 0.0[s] )  
trapezoid( 0[Hz], 0[Hz], 80[Hz], 100[Hz] )  
zerofill( 1, TRUE )  
fft( 1, TRUE, TRUE )  
machinephase  
ppa

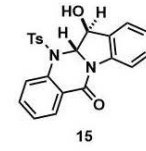

以下由表: TK-6-148-2-2\_proton-1-1.jdf

Filename = TK-6-148-2-2\_proton-1-3.jdf  
Author = delta  
Experiment = proton.jsp  
Sample\_id = TK-6-148-2-2  
Solvent = CHLOROFORM-D  
Actual\_Start\_Time = 26-JUN-2024 22:06:07  
Version\_Time = 3-JUL-2024 14:47:21

Data Format = 1D COMPLEX  
Data Size = 26214  
X\_Domain = Proton  
Data Title = Proton  
Data Units = (ppm)  
Dimensions = X  
Spectrometer = JNM-ECZ600R/S3

Field Strength = 14.09636928[T] (600[MHz])  
Acq\_Duration = 2.91110912[s]  
X\_Domain = Proton  
X\_Freq = 600.1723046[MHz]  
X\_Offset = 5[ppm]  
X\_Points = 32768  
X\_Prescans = 1  
X\_Resolution = 0.34351169[Hz]  
X\_Sweep = 11.2561909[kHz]  
X\_Sweep\_Clippped = 9.00495272[kHz]  
F1\_Domain = Proton  
F1\_Freq = 600.1723046[MHz]  
F1\_Offset = 5[ppm]  
F1\_Domain = Proton  
F1\_Freq = 600.1723046[MHz]  
F1\_Offset = 5[ppm]  
Blanking = 5.0[us]  
Clipped = FALSE  
Scans = 4  
Total\_Scans = 4

Relaxation\_Delay = 2[s]  
Recvr Gain = 56  
Temp\_Set = 21[degC]  
X\_90\_Width = 9.9[us]  
X\_Acq Time = 2.91110912[s]  
X\_Angle = 45[deg]  
X\_Atn = 8.1[dB]  
X\_Pulse = 4.95[us]  
F1\_Mode = Off  
F1\_Mode = Off  
Dante\_Loop = 200  
Dante\_Preset = FALSE  
Decimation\_Rate = 0  
Initial\_Wait = 1[s]  
Phase = (0, 90, 270, 180, 180, 270, 90, 0)  
Preset\_Time = 2[s]  
Preset\_Time\_Play = FALSE  
Relaxation\_Delay\_Calc = 0[s]  
Relaxation\_Delay\_Temp = 2[s]  
Repetition\_Time = 4.91110912[s]

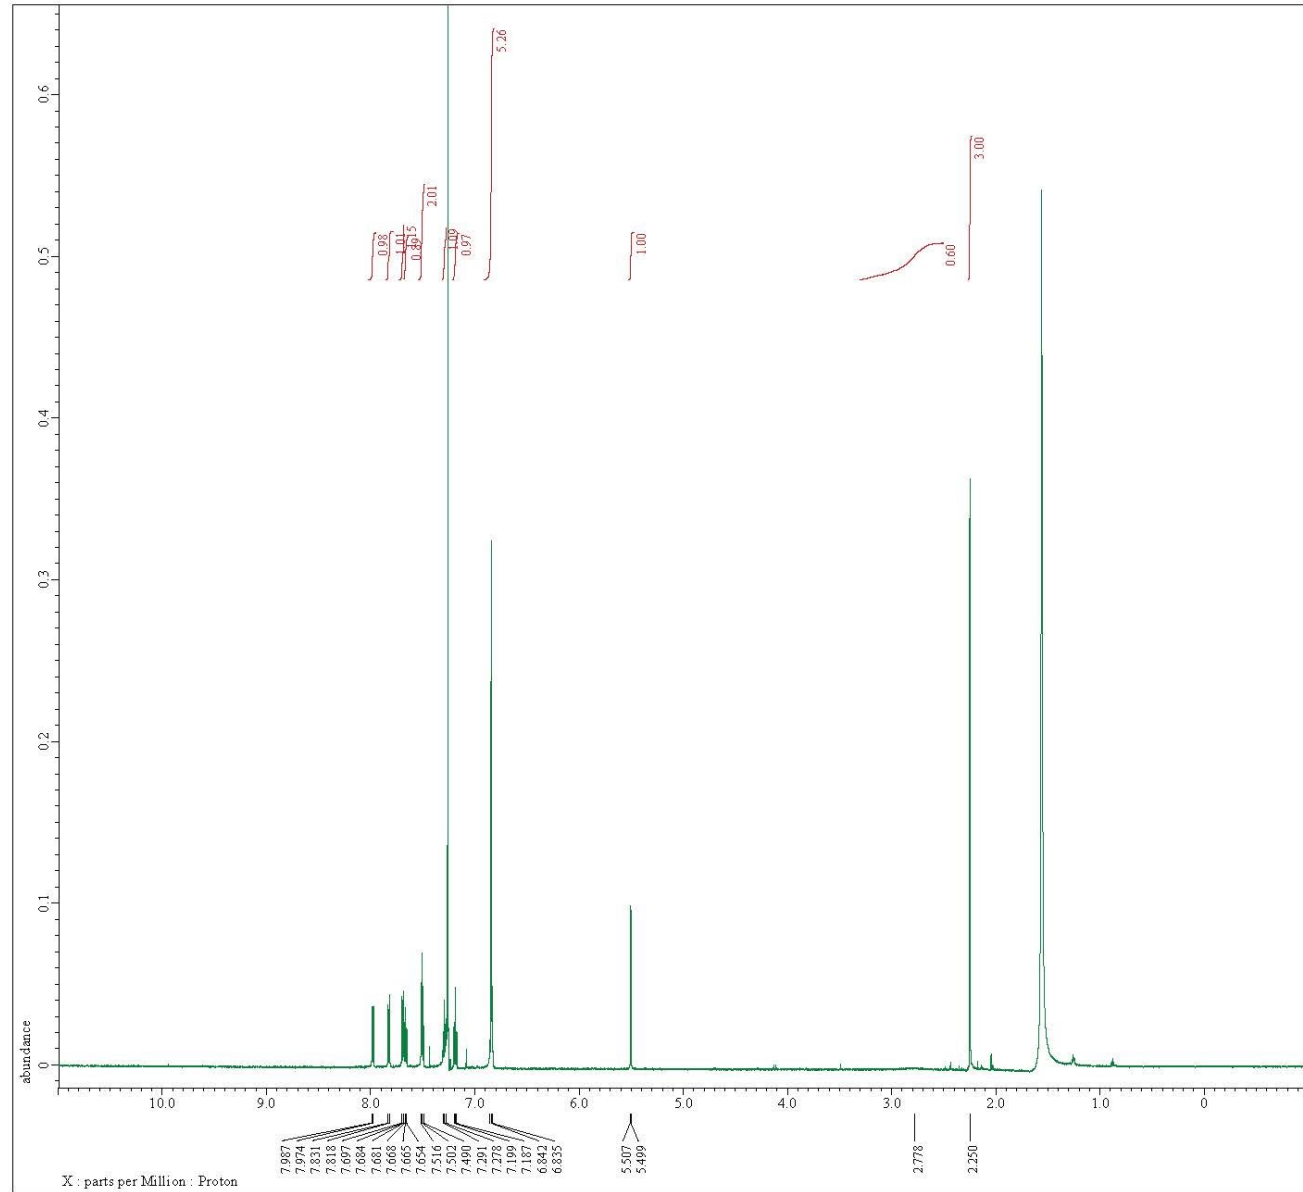



---- PROCESSING PARAMETERS ----  
blip\_cld( 16, 64, 1 )  
sexp( 2.0[Hz], 0.0[s] )  
fft( 1, TRUE, TRUE )  
machinephase  
ppm

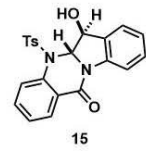

Filename = TK-6-148-2\_carbon-1-2\_jdf  
Author = delta  
Experiment = carbon\_jsp  
Sample\_id = TK-6-148-2  
Solvent = CHLOROFORM-D  
Actual\_Start\_Time = 25-JUN-2024 21:48:12  
Revision\_Time = 25-JUN-2024 21:49:50

Data Format = 1D COMPLEX  
Data Size = 26214  
X\_Domain = Carbon13  
Data Title = Carbon13  
Data Units = [ppm]  
Dimensions = X  
Spectrometer = JNM-ECZ600R/S3

Field Strength = 14.09636928 [T] (600 [MHz])  
X\_Acq\_Duration = 0.69206016 [s]  
X\_Domain = Carbon13  
X\_Freq = 150.91343039 [MHz]  
X\_Offset = 100 [ppm]  
X\_Points = 32768  
X\_Prescans = 1  
X\_Resolution = 1.44496109 [Hz]  
X\_Sweep = 47.34848485 [kHz]  
X\_Sweep\_Clippped = 37.87878788 [kHz]  
Irr\_Domain = proton  
Irr\_Freq = 600.1723046 [MHz]  
Irr\_Offset = 5 [ppm]  
Blanking = 15.0 [us]  
Clipped = FALSE  
Scans = 129  
Total\_Scans = 129

Relaxation\_Delay = 1 [s]  
Recvs\_Gain = 56  
Temp\_Dec = 21.1 [dC]  
X\_90\_Width = 0.11 [us]  
X\_Acq\_Time = 0.69206016 [s]  
X\_Angle = 30 [deg]  
X\_Am = 11 [dB]  
X\_Pulse = 2.7 [us]  
Irr\_Am\_Dec = 25.803 [dB]  
Irr\_Am\_Dec\_Calc = 25.803 [dB]  
Irr\_Am\_Dec\_Default\_Calc = 25.803 [dB]  
Irr\_Dec\_Bandwidth\_Hz = 7.23684211 [kHz]  
Irr\_Dec\_Bandwidth\_Ppm = 12.05794079 [ppm]  
Irr\_Dec\_Freq = 600.1723046 [MHz]  
Irr\_Dec\_Merit\_Factor = 2.2  
Irr\_Decoupling = TRUE  
Irr\_Noise = FALSE  
Irr\_Noise = WAITZ  
Irr\_Offset\_Default = 5 [ppm]  
Irr\_Per\_dch = 76 [us]  
Irr\_Per\_dch\_Default = 76 [us]  
Irr\_Per\_dch\_Default\_Calc = 76 [us]  
Irr\_Per\_dch\_Templ = 76 [us]  
Irr\_Wurst = FALSE  
Decimation\_Rate = 0  
Initial\_Wait = 1 [s]  
Noe\_Time = 1 [s]  
Noe\_Time\_Play = FALSE  
Relaxation\_Delay\_Calc = 0 [s]  
Relaxation\_Delay\_Temp = 1 [s]  
Repetition\_Time = 1.69206016 [s]

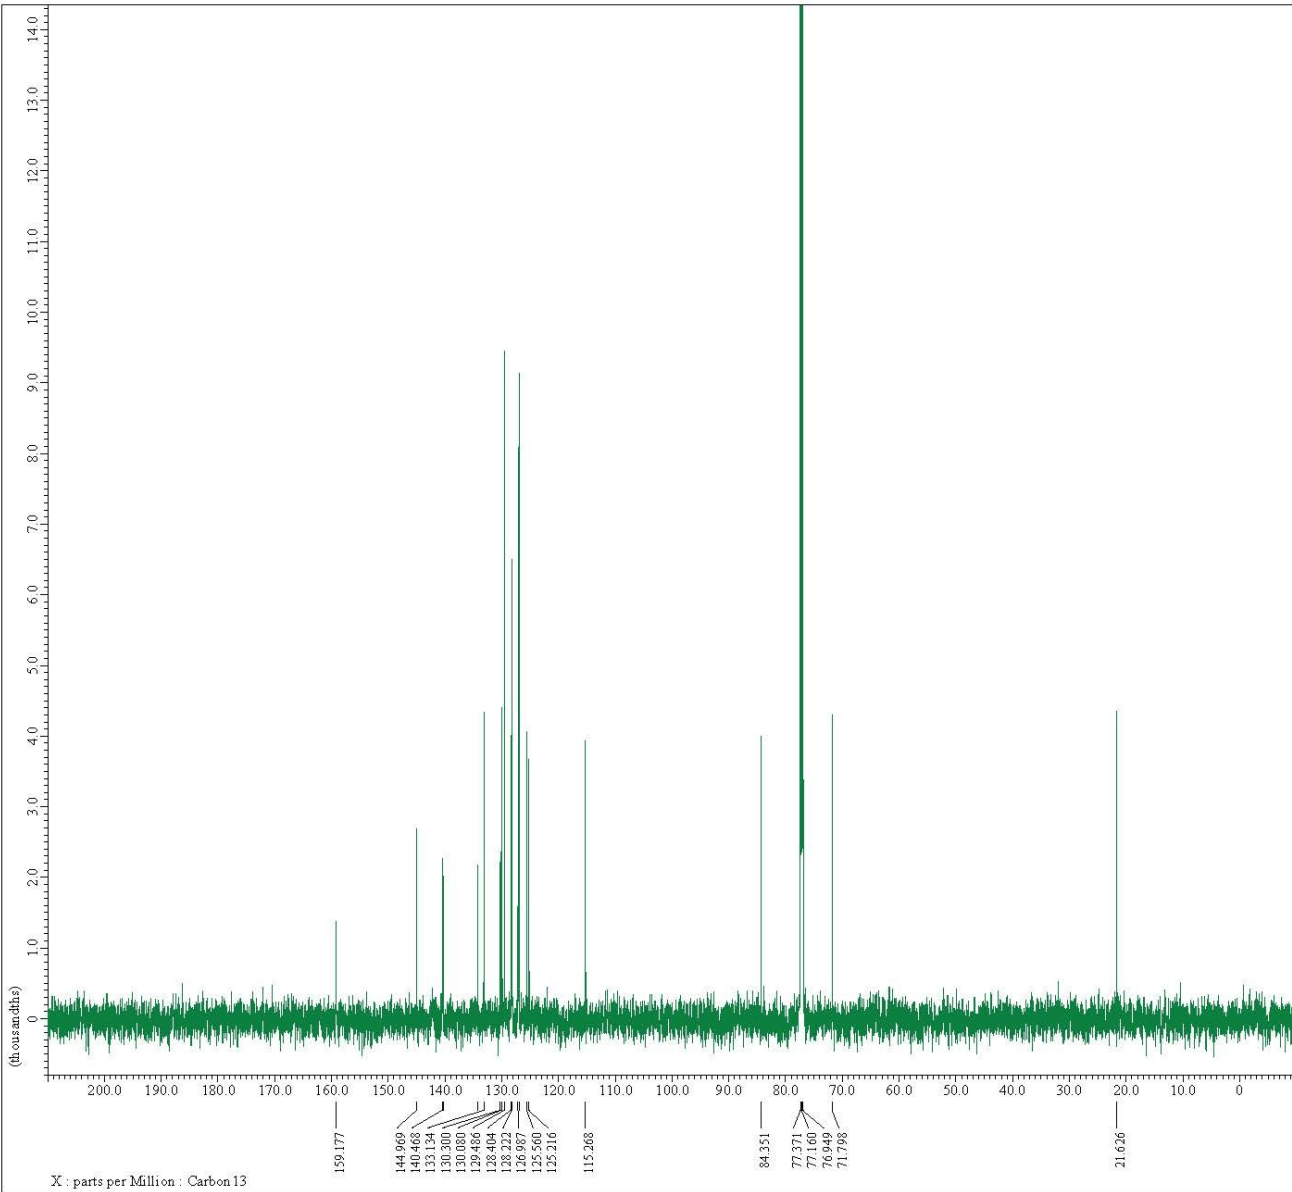

Supplement: d4ob01218f1.pdf [file d4ob01218f1.pdf]
